# Supplementary material for: Theoretical understanding of stability of mechanically interlocked carbon nanotubes and their precursors
Source: Royal Society of Chemistry journal article supplement (doi:10.1039/d2cp04738a), 2023-01-01
Supplement: d2cp04738a1.pdf [file d2cp04738a1.pdf]

## Supporting Information

### Theoretical Understandings of Stability of Mechanically Interlocked Carbon Nanotubes and Their Precursors

Takashi Yumura,\* Nobuyuki Sugimori, and Shuta Fukuura

*Faculty of Materials Science and Engineering, Graduate School of Science and  
Technology, Kyoto Institute of Technology, Matsugasaki, Sakyo-ku, Kyoto, 606-8585,  
Japan*

1. Models of finite-length tubes (Figure S1)
2. Potential energy surfaces (PESs) of benzene approaching naphthalene (Figure S2 and Table S1)
3. Lengths of optimized UP- $n$  structures (Figures S3 and S4)
4. Optimized structures for UP-8-( $a,a$ ) and UP-9-( $a,a$ ) (Figures S5 & S6)
5. Energy decomposition analyses of  $E_{\text{stabilize}}$  values
6. Optimized structure for ( $a,a$ )@Cycle-8, ( $a,a$ )@Cycle-9 plus (10,10)@Cycle-9 (Figures S7, S8 and S9)
7. Optimized structure for ( $a,b$ )@Cycle- $n$  (Figures S10, S11 and S12)
8. Optimized lengths of  $sp^3$  CC bonds in the macrocycle in ( $m,m$ )@Cycle- $n$  (Table S2)
9. Full lists in Refs. 32 and 39
10. Energies of the optimized geometries, and their Cartesian Coordinates.

## 1. Models of finite-length tubes

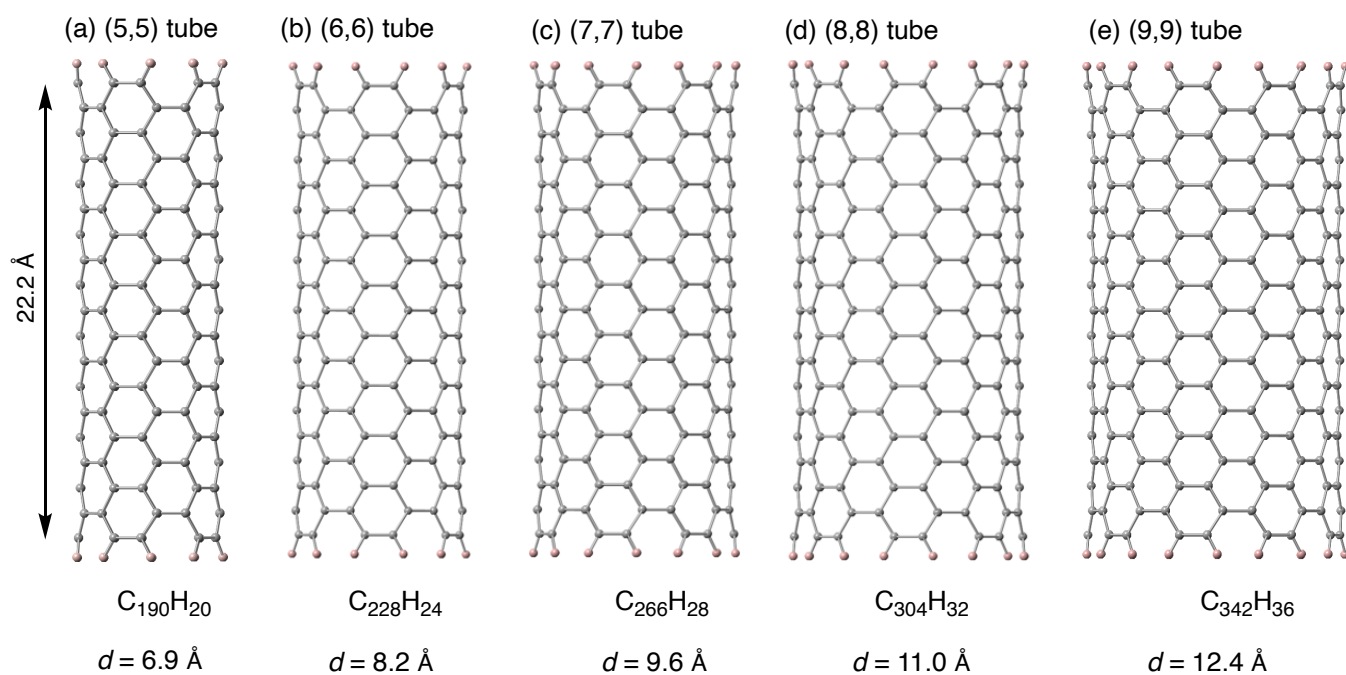

**Fig. S1** Optimized structures for finite-length ( $a,a$ ) tubes: (a)  $a = 5$ , (b)  $a = 6$ , (c)  $a = 7$ , (d)  $a = 8$ , and (e)  $a = 9$ . Their tube lengths are 22.2 Å. The optimized tube diameters ( $d$ ) are also given.

## 2 Potential energy surfaces (PESs) of benzene approaching naphthalene

Figure S2 shows PESs of benzene approaching naphthalene in T-shaped and stacking alignments, obtained from our previous study (Ref. 53). According to the energy scanning analyses in Ref. 53, we found attractive interactions originated from CH- $\pi$  and  $\pi$ - $\pi$  interactions between benzene and naphthalene, represented by  $E_{\min}$  values. The local minima of the T-shaped and stacking complexes have the  $E_{\min}$  values of -4.6 and -3.2 kcal/mol at the equilibrium internuclear separations ( $S_e$ ) of 2.87 and 3.65 Å, respectively. Their key parameters are summarized in Table S1. With respect to both equilibrium structures, we newly obtained the height of C<sub>6</sub>H<sub>6</sub> from C<sub>8</sub>H<sub>10</sub> is also given as  $H_e$ . In the equilibrium T-shaped structure, the distance of an H benzene atom neighboring to naphthalene, from the naphthalene plane is defined as the height. In the equilibrium stacking complex, the distance of the center of benzene from that of naphthalene is defined as the height. By using the definition, the  $H_e$  values in the T-shaped and stacking complexes are 2.5 and 3.6 Å, respectively.

In addition, we focus on C<sub>6</sub>H<sub>6</sub>-C<sub>8</sub>H<sub>10</sub> complexes that are energetically identical to the dissociation limit toward C<sub>6</sub>H<sub>6</sub> and C<sub>8</sub>H<sub>10</sub> to represent the internuclear separation denoting the  $S_0$  value. The  $S_0$  values in the T-shaped and stacking complexes are 2.50 and 3.19 Å, respectively, according to Ref. 53. The corresponding  $H_0$  values are newly listed in Table S1: The  $H_0$  values in the T-shaped and stacking structures are 2.1 and 3.1, respectively. When separations between benzene and naphthalene further decrease from the  $S_0$  and  $H_0$  value, benzene and naphthalene begin to interact in repulsive manners. Thus,

the  $S_0$  value is the smallest limit of internuclear separation between  $C_6H_6$  and  $C_8H_{10}$  without any long-range repulsive interactions.

**Table S1.** Key parameters in the potential energy surfaces of benzene approaching naphthalene with two orientation models given in Figure S2.

| Models                       | Stacking model <sup>a</sup> | T-shaped model <sup>a</sup> |
|------------------------------|-----------------------------|-----------------------------|
| Interactions                 | $\pi$ - $\pi$ interactions  | CH- $\pi$ interactions      |
| $S_0$ ( $H_0$ ) <sup>b</sup> | 3.15 (3.1)                  | 2.50 (2.1)                  |
| $S_c$ ( $H_c$ ) <sup>c</sup> | 3.65 (3.6)                  | 2.86 (2.5)                  |
| $E_{\min}$ <sup>d</sup>      | -3.2                        | -4.6                        |

- a) The two models can be seen in Figure S2.
- b) Internuclear separation ( $S_0$  in Å) in a  $C_6H_6$ - $C_8H_{10}$  complex is energetically identical to the dissociation limit toward  $C_6H_6$  and  $C_8H_{10}$ . In T-shaped models, their heights, defined in Figure S2, are given as  $H_0$  in parentheses whose units are in Å.
- c) Internuclear separation ( $S_c$  in Å) in the local minimum of a  $C_6H_6$ - $C_8H_{10}$  complex. In T-shaped models, their heights, defined in Figure S2, are given as  $H_c$  in parentheses whose unit in Å.
- d) Stabilization energy ( $E_{\min}$  in kcal/mol) of the local minimum of a  $C_6H_6$ - $C_8H_{10}$  complex, measured from the dissociation limit toward  $C_6H_6$  and  $C_8H_{10}$ .



(a) stacking orientation stabilized by  $\pi$ - $\pi$  interactions

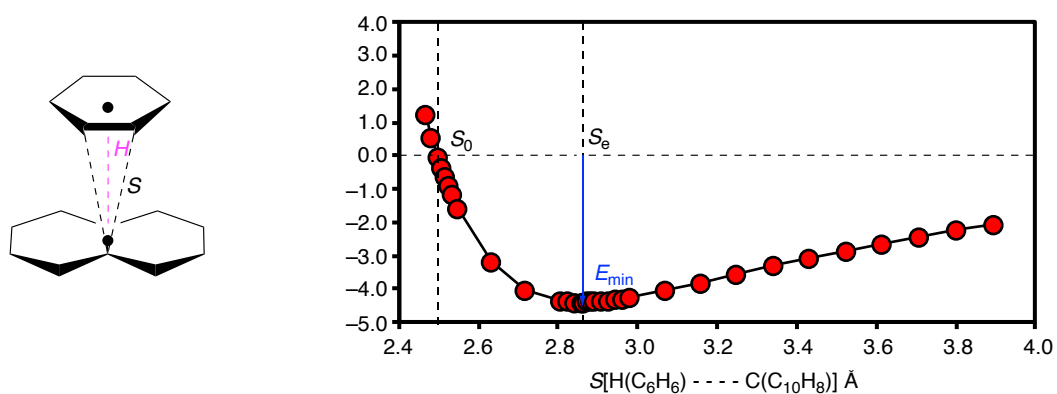

(b) T-shaped orientation stabilized by CH- $\pi$  interactions

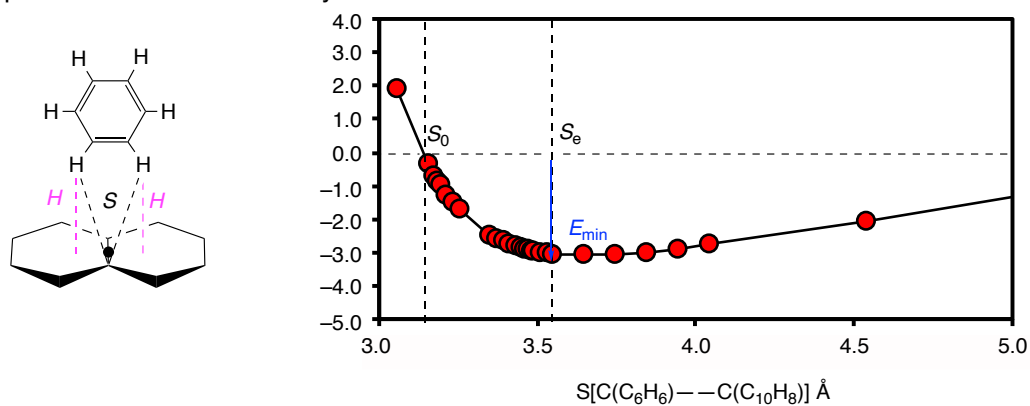

**Fig. S2** Potential energy surfaces (PESs) for benzene approaching naphthalene as a function of atom separations ( $S$ ), obtained from B97D calculations. We also define height of benzene from naphthalene as  $H$  in this figure. There are two types of orientation constructed by benzene and naphthalene: (a) stacking orientation and (b) T-shaped orientation that are stabilized by  $\pi$ - $\pi$  and CH- $\pi$  interactions, respectively. Key parameters in PESs ( $E_{\text{min}}$ , as well as  $S_0$  and  $S_e$  and their corresponding height ( $H_0$  and  $H_e$ )) are defined in this figure and listed in Table S1.

### 3. Lengths of optimized UP- $n$ structures ( $L$ )

Lengths of optimized UP- $n$  structures in Å are calculated according to Figure S3. Then, we plotted lengths of optimized UP- $n$  structures are a function of  $n$  ( $6 \leq n \leq 9$ ) in Figure S4. Then, we found that the  $L$  values increase in a linear fashion against  $n$ , fitted by the following equation.

$$L = 2.52 \times n + 28.55 \quad (\text{S1})$$

The fitting equation can be used for predicting lengths of optimized UP- $n$  structures, even when  $n$  is large than 9.

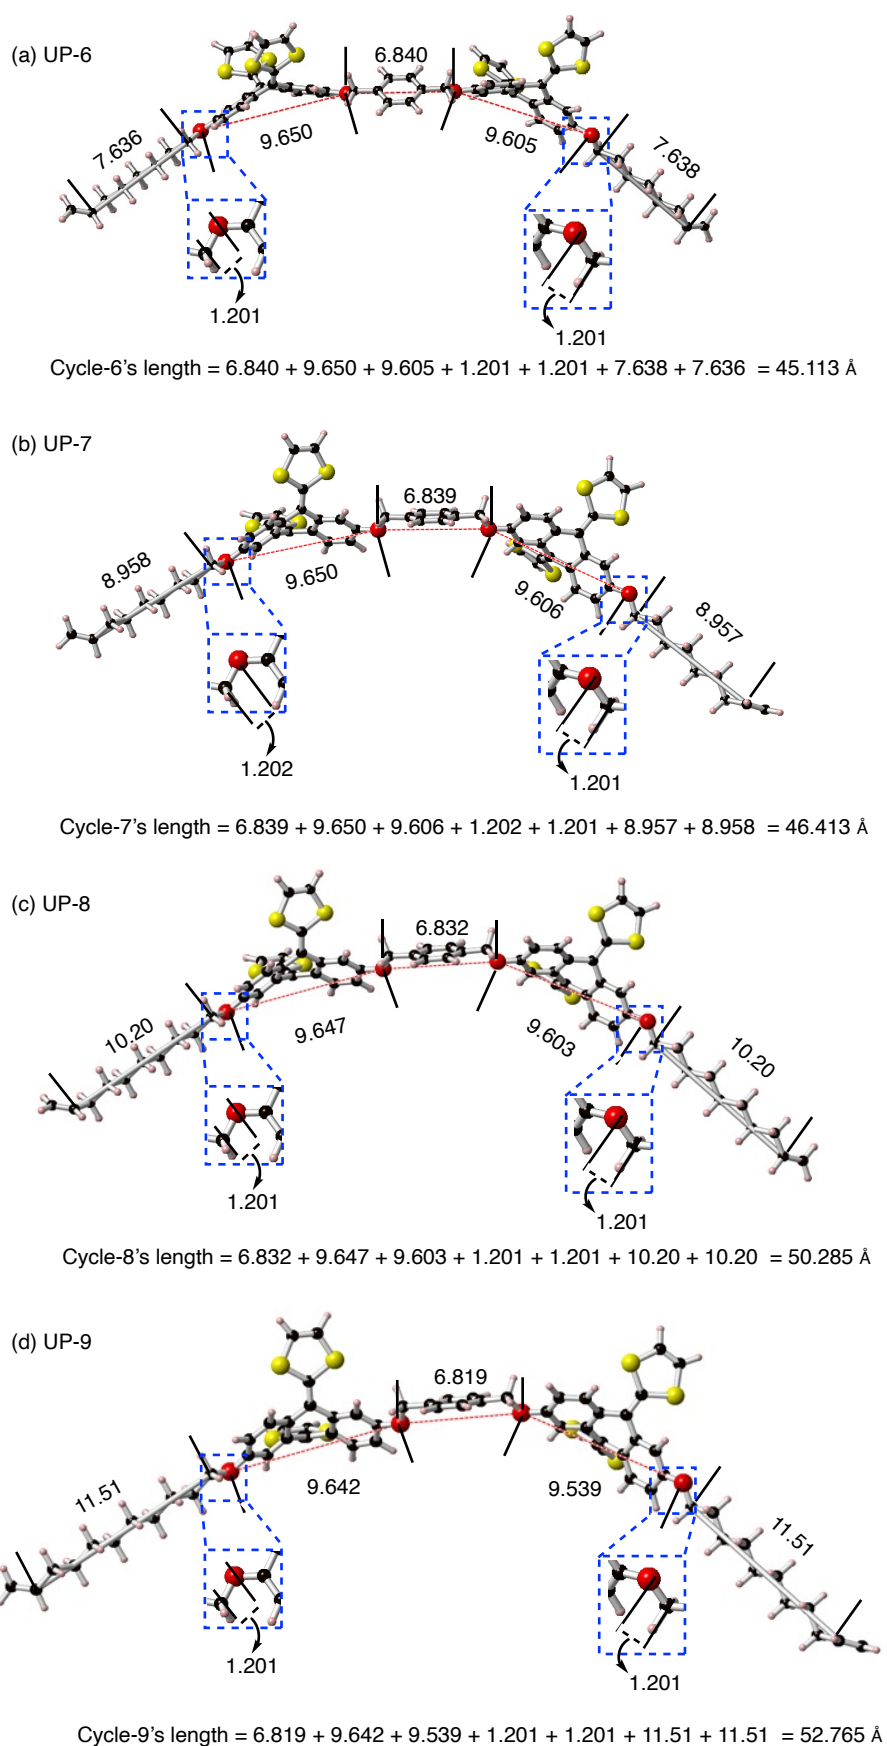

**Fig. S3** Three optimized structures for a UP-shaped precursor of *p*-xylene-linked bis-exTTF terminated by an alkyl ( $C_nH_{2n}$ ) linker with terminate ethene (UP-*n*), where *n* is 6~9.

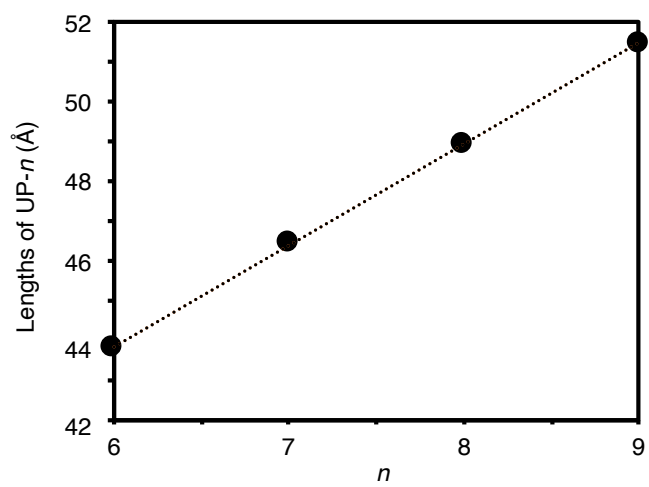

**Fig. S4** Lengths of UP- $n$  in Å are plotted as a function of  $n$ .

#### 4. Optimized structures for UP-8-( $a,a$ ) and UP-9-( $a,a$ )

(a) UP-8-(5,5)

$$E_{\text{stabilize}} = -70.2 \text{ kcal/mol}$$

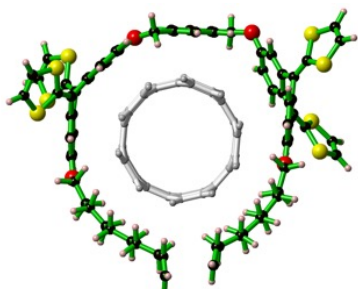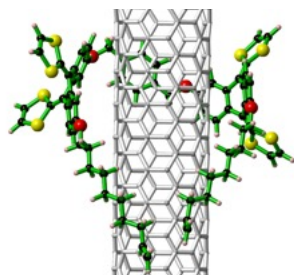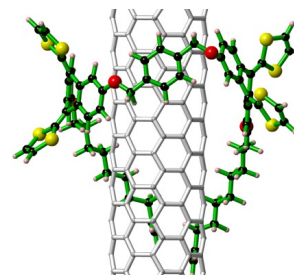

(b) UP-8-(6,6)

$$E_{\text{stabilize}} = -71.2 \text{ kcal/mol}$$

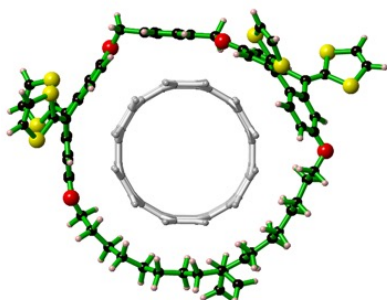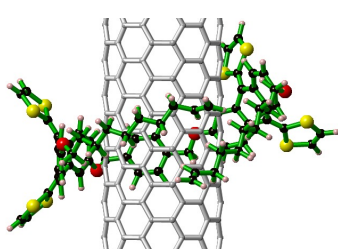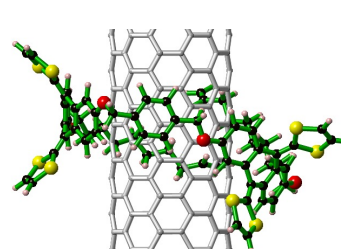

(c) UP-8-(7,7)

$$E_{\text{stabilize}} = -74.2 \text{ kcal/mol}$$

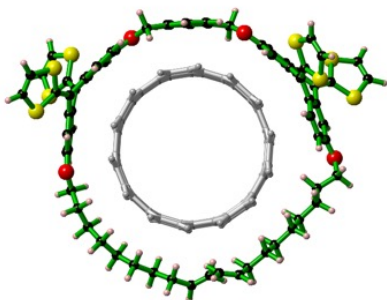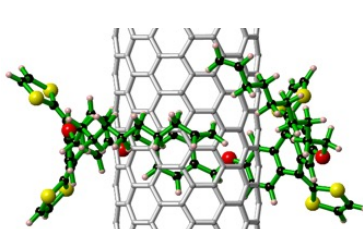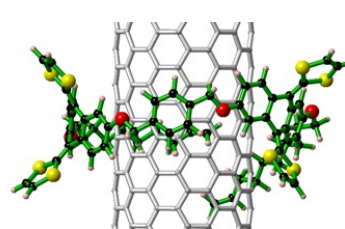

(d) UP-8-(8,8)

$$E_{\text{stabilize}} = -78.5 \text{ kcal/mol}$$

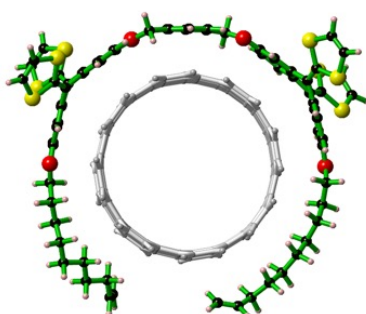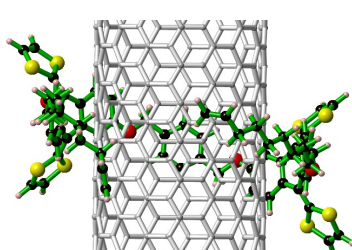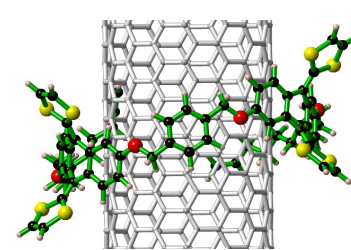

(e) UP-8-(9,9)

$$E_{\text{stabilize}} = -79.4 \text{ kcal/mol}$$

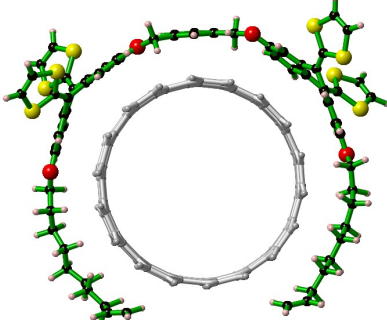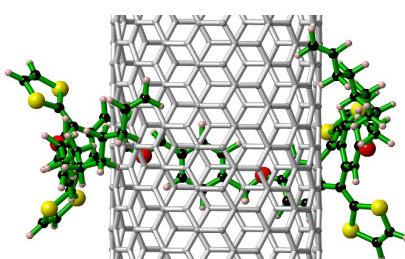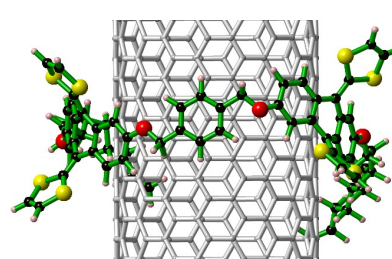

**Fig. S5** Optimized structures for an ( $a,a$ ) tube weakly bound by a UP-shaped bis-exTTF precursor (UP- $n$ ) where  $n$  is 8 (UP-8-( $a,a$ )): (a)  $a = 5$ , (b)  $a = 6$ , (c)  $a = 7$ , (d)  $a = 8$ , and (e)  $a = 9$ . Their stabilization energies ( $E_{\text{stabilize}}$  values) are given.



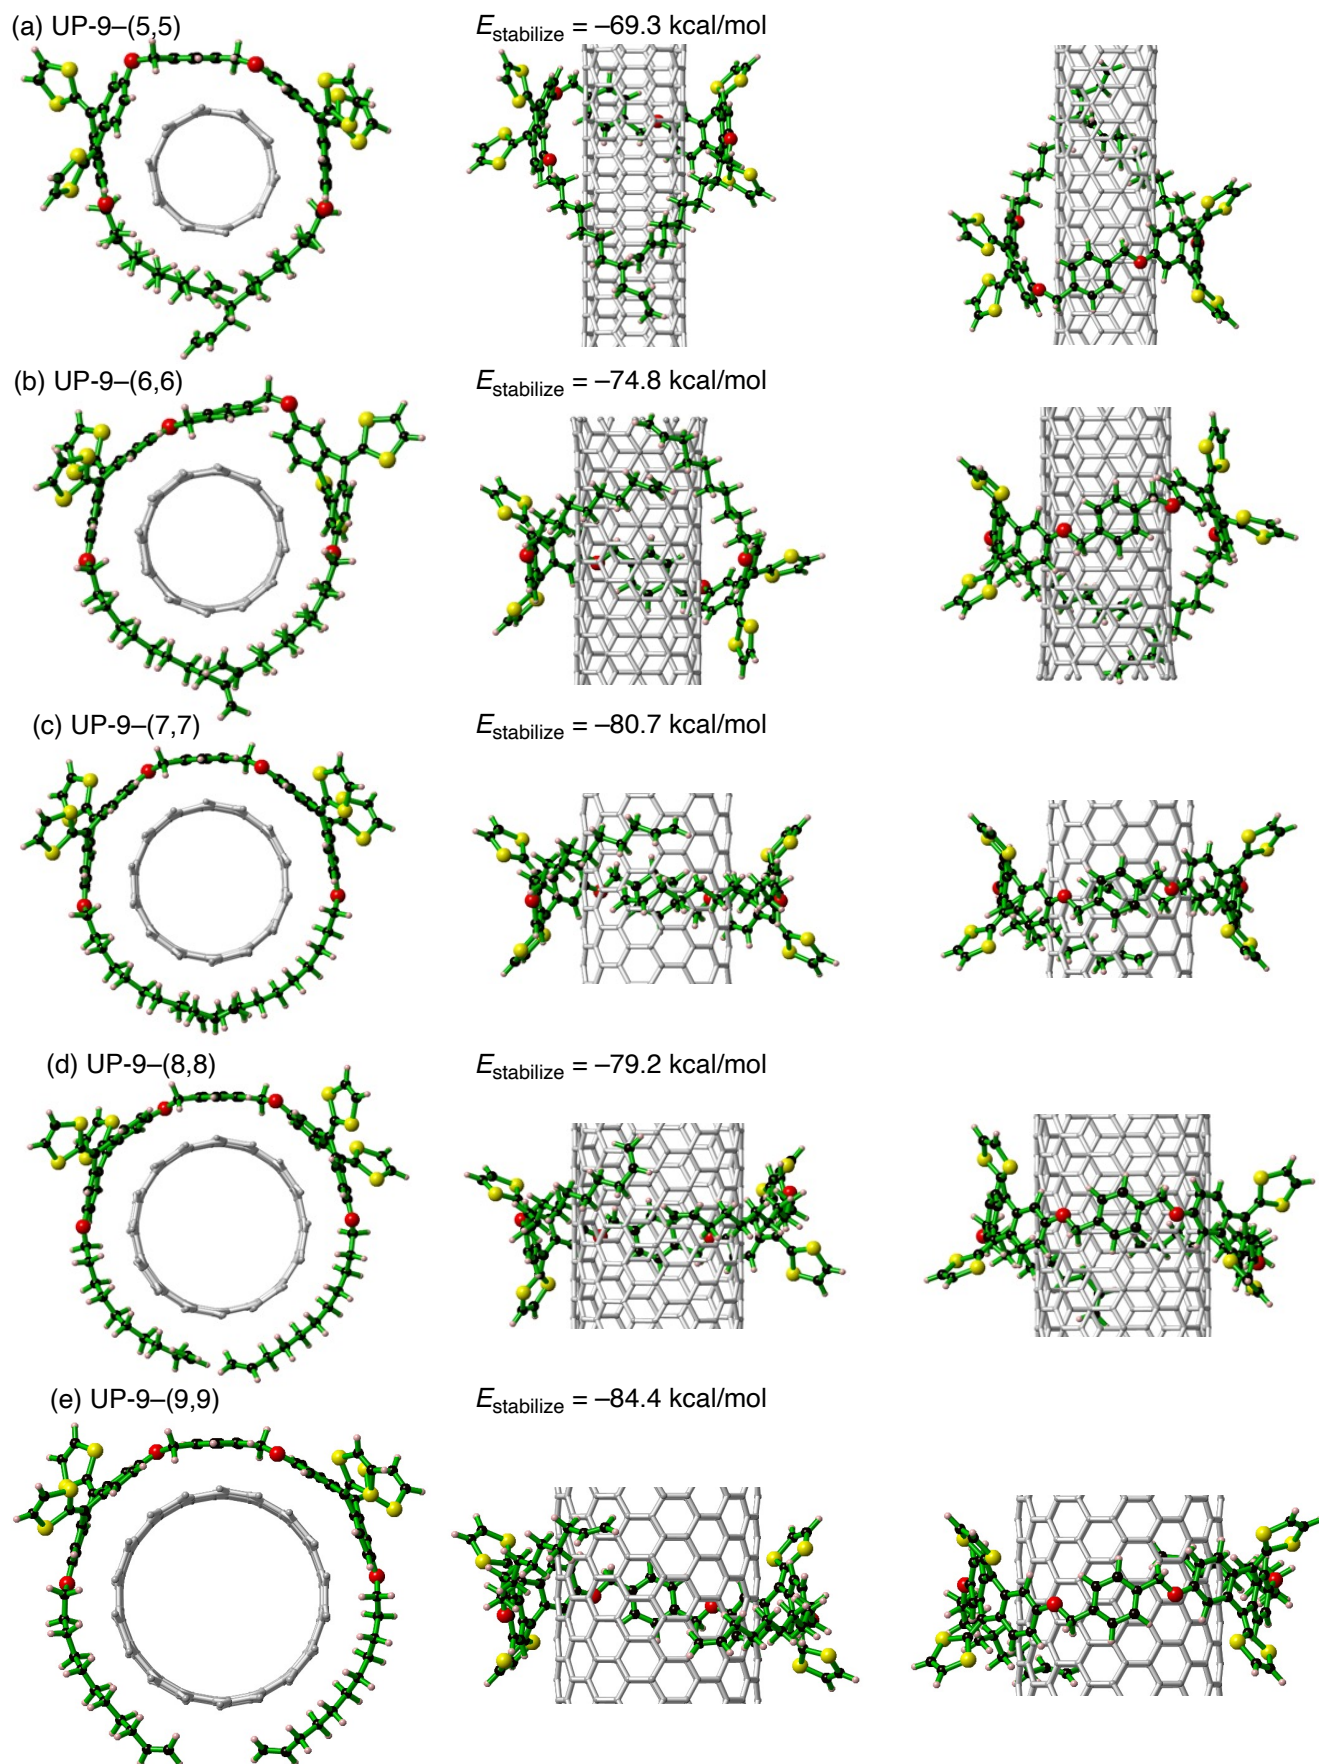

**Fig. S6** Optimized structures for an  $(a,a)$  tube weakly bound by a UP-shaped bis-exTTF precursor (UP- $n$ ) where  $n$  is 9 (UP-9- $(a,a)$ ): (a)  $a = 5$ , (b)  $a = 6$ , (c)  $a = 7$ , (d)  $a = 8$ , and (e)  $a = 9$ . Their stabilization energies ( $E_{\text{stabilize}}$  values) are given.

## 5. Energy decomposition analyses of $E_{\text{stabilize}}$ values

The stabilization energies of the UP- $n$ -( $a,a$ ) structures ( $E_{\text{stabilize}}$ ), defined in the equation (1), are decomposed to three energy components, host-guest interactions between the UP- $n$  and ( $a,a$ ) tube ( $E_{\text{long-range}}$ ), and both the energy penalties required for the deformation of a UP- $n$  or a tube, when a UP- $n$  wraps around a tube to form a UP- $n$ -( $m,m$ ) structure ( $E_{\text{deform(UP)}}$  and  $E_{\text{deform(tube)}}$ , respectively). The three energy components are defined in the following equations.

$$E_{\text{long-range}}(\text{UP-}n\text{-(}a,a\text{)}) = E(\text{UP-}n\text{-(}a,a\text{)}) - E(\text{UP-}n \text{ from UP-}n\text{-(}a,a\text{)}) - E(\text{tube from UP-}n\text{-(}a,a\text{)}) \quad (\text{S2})$$

$$E_{\text{deform(UP)}} = E(\text{UP-}n \text{ from UP-}n\text{-(}a,a\text{)}) - E(\text{UP-}n) \quad (\text{S3})$$

$$E_{\text{deform(tube)}} = E(\text{tube from UP-}n\text{-(}a,a\text{)}) - E(\text{tube}) \quad (\text{S4})$$

Here,  $E(\text{UP-}n \text{ from UP-}n\text{-(}a,a\text{)})$  and  $E(\text{tube from UP-}n\text{-(}a,a\text{)})$  are the total energies of a UP- $n$  and a tube taken from the optimized UP- $n$ -( $m,m$ ) structure, respectively, as well as  $E(\text{UP-}n)$  and  $E(\text{tube})$  are those of the optimized UP- $n$  and tube structures, respectively.

Similarly, the stabilization energy of an ( $a,b$ )@Cycle- $n$  structure ( $E_{\text{stabilize}}$ ), defined in the equation (2), are decomposed to three energy values, host-guest interactions between the Cycle- $n$  and ( $a,b$ ) tube ( $E_{\text{long-range}}$ ), and both the energy penalties required for the

deformation of a Cycle- $n$  or a tube, when an  $(a,b)@Cycle-n$  structure is formed ( $E_{\text{deform}}(\text{Cycle})$  and  $E_{\text{deform}}(\text{tube})$ , respectively). We defined the three energy components, as follow.

$$E_{\text{long-range}}((a,b)@Cycle-n) = E((a,b)@Cycle-n) - E(\text{Cycle-}n \text{ from } (a,b)@Cycle-n) - E(\text{tube from } (a,b)@Cycle-n) \quad (\text{S5})$$

$$E_{\text{deform}}(\text{Cycle}) = E(\text{Cycle-}n \text{ from } (a,b)@Cycle-n) + E(\text{C}_2\text{H}_4) - E(\text{UP-}n) \quad (\text{S6})$$

$$E_{\text{deform}}(\text{tube}) = E(\text{tube from } (a,b)@Cycle-n) - E(\text{tube}) \quad (\text{S7})$$

Here,  $E(\text{Cycle-}n \text{ from } (a,b)@Cycle-n)$  and  $E(\text{tube from } (a,b)@Cycle-n)$  are the total energies of a Cycle- $n$  and a tube taken from the optimized  $(a,b)@Cycle-n$  structure, respectively, as well as  $E(\text{C}_2\text{H}_4)$  is that of the optimized  $\text{C}_2\text{H}_4$  structure.



## 6. Optimized structures for $(a,a)$ @Cycle-8, $(a,a)$ @Cycle-9 plus $(10,10)$ @Cycle-9

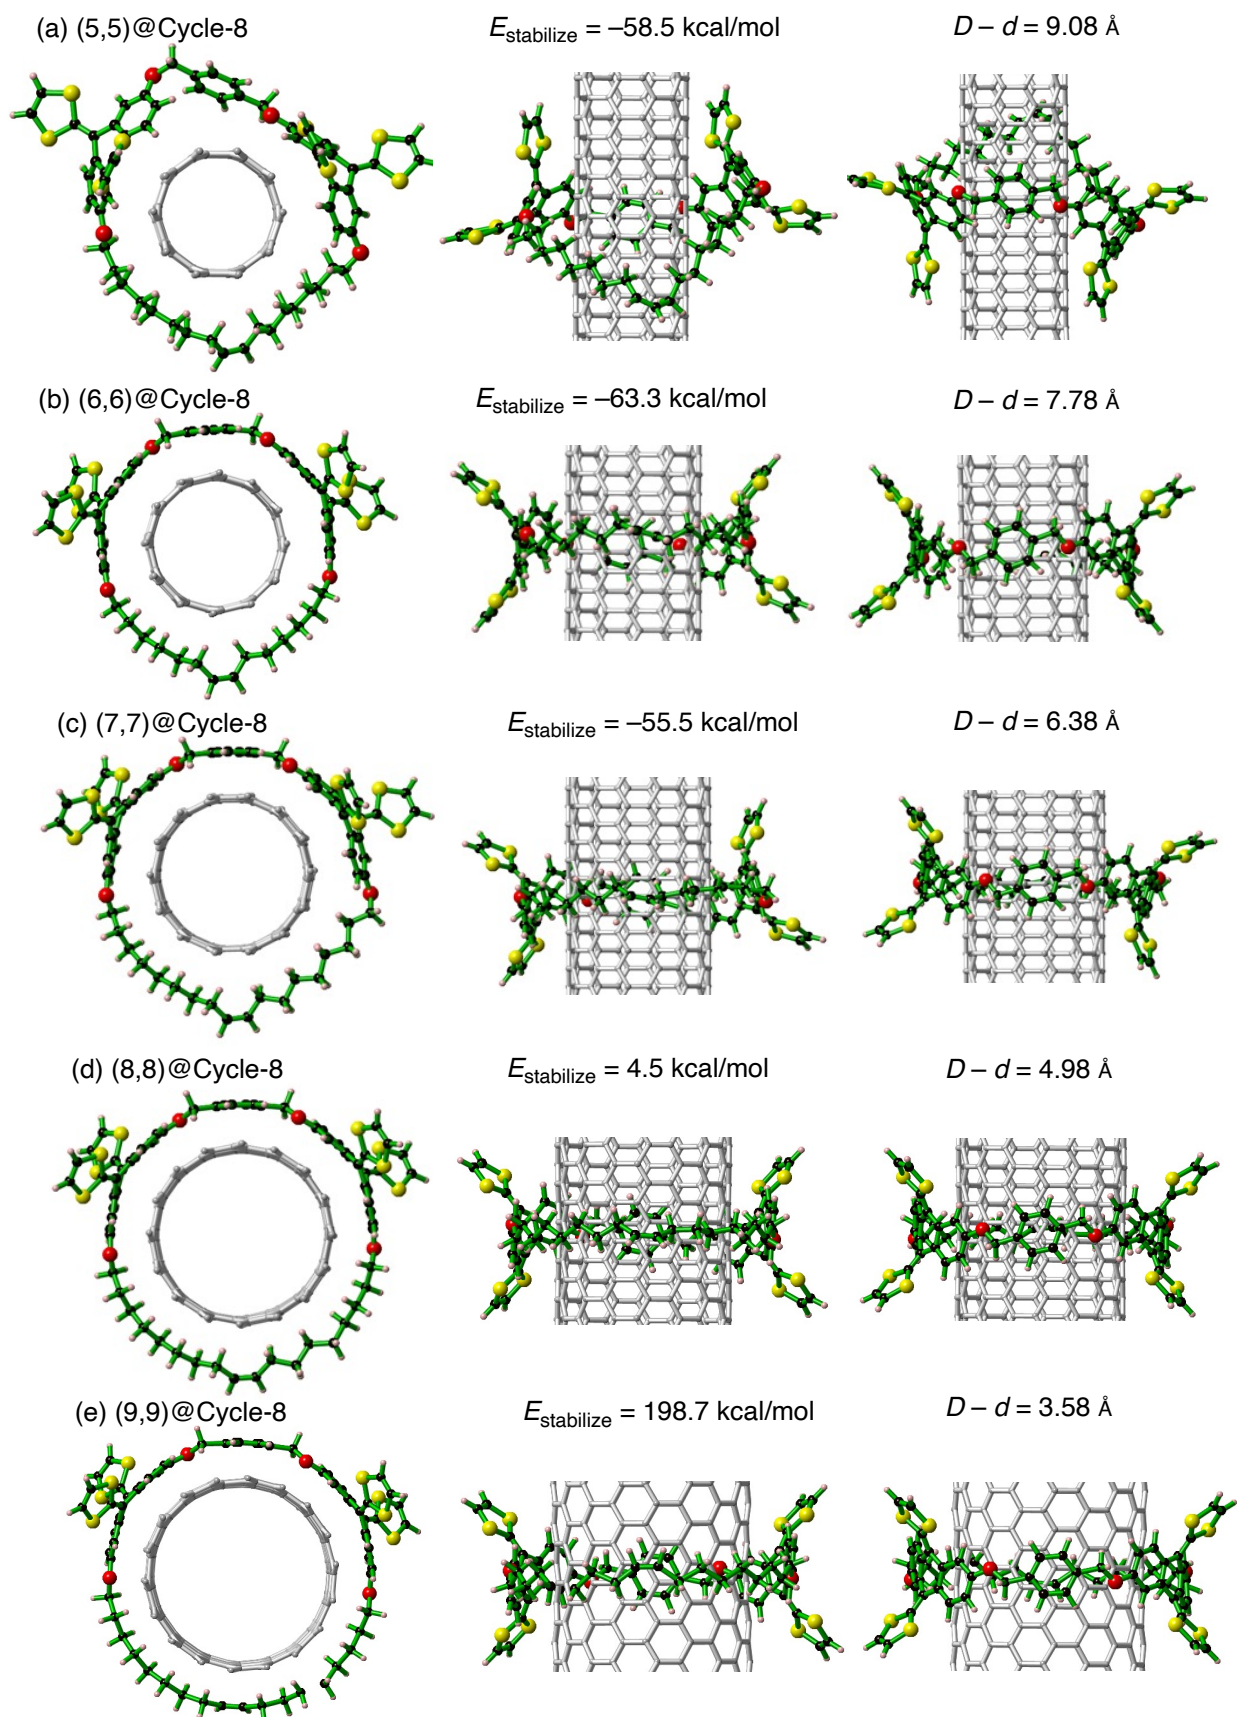

**Fig. S7** Optimized structures for an  $(a,a)$  tube inside the macrocycle formed by ring-closing metathesis of UP-8- $(a,a)$  ( $(a,a)$ @Cycle-8): (a)  $a = 5$ , (b)  $a = 6$ , (c)  $a = 7$ , (d)  $a = 8$ , and (e)  $a = 9$ . Their stabilization energies ( $E_{\text{stabilize}}$  values) and  $D - d$  values are given.

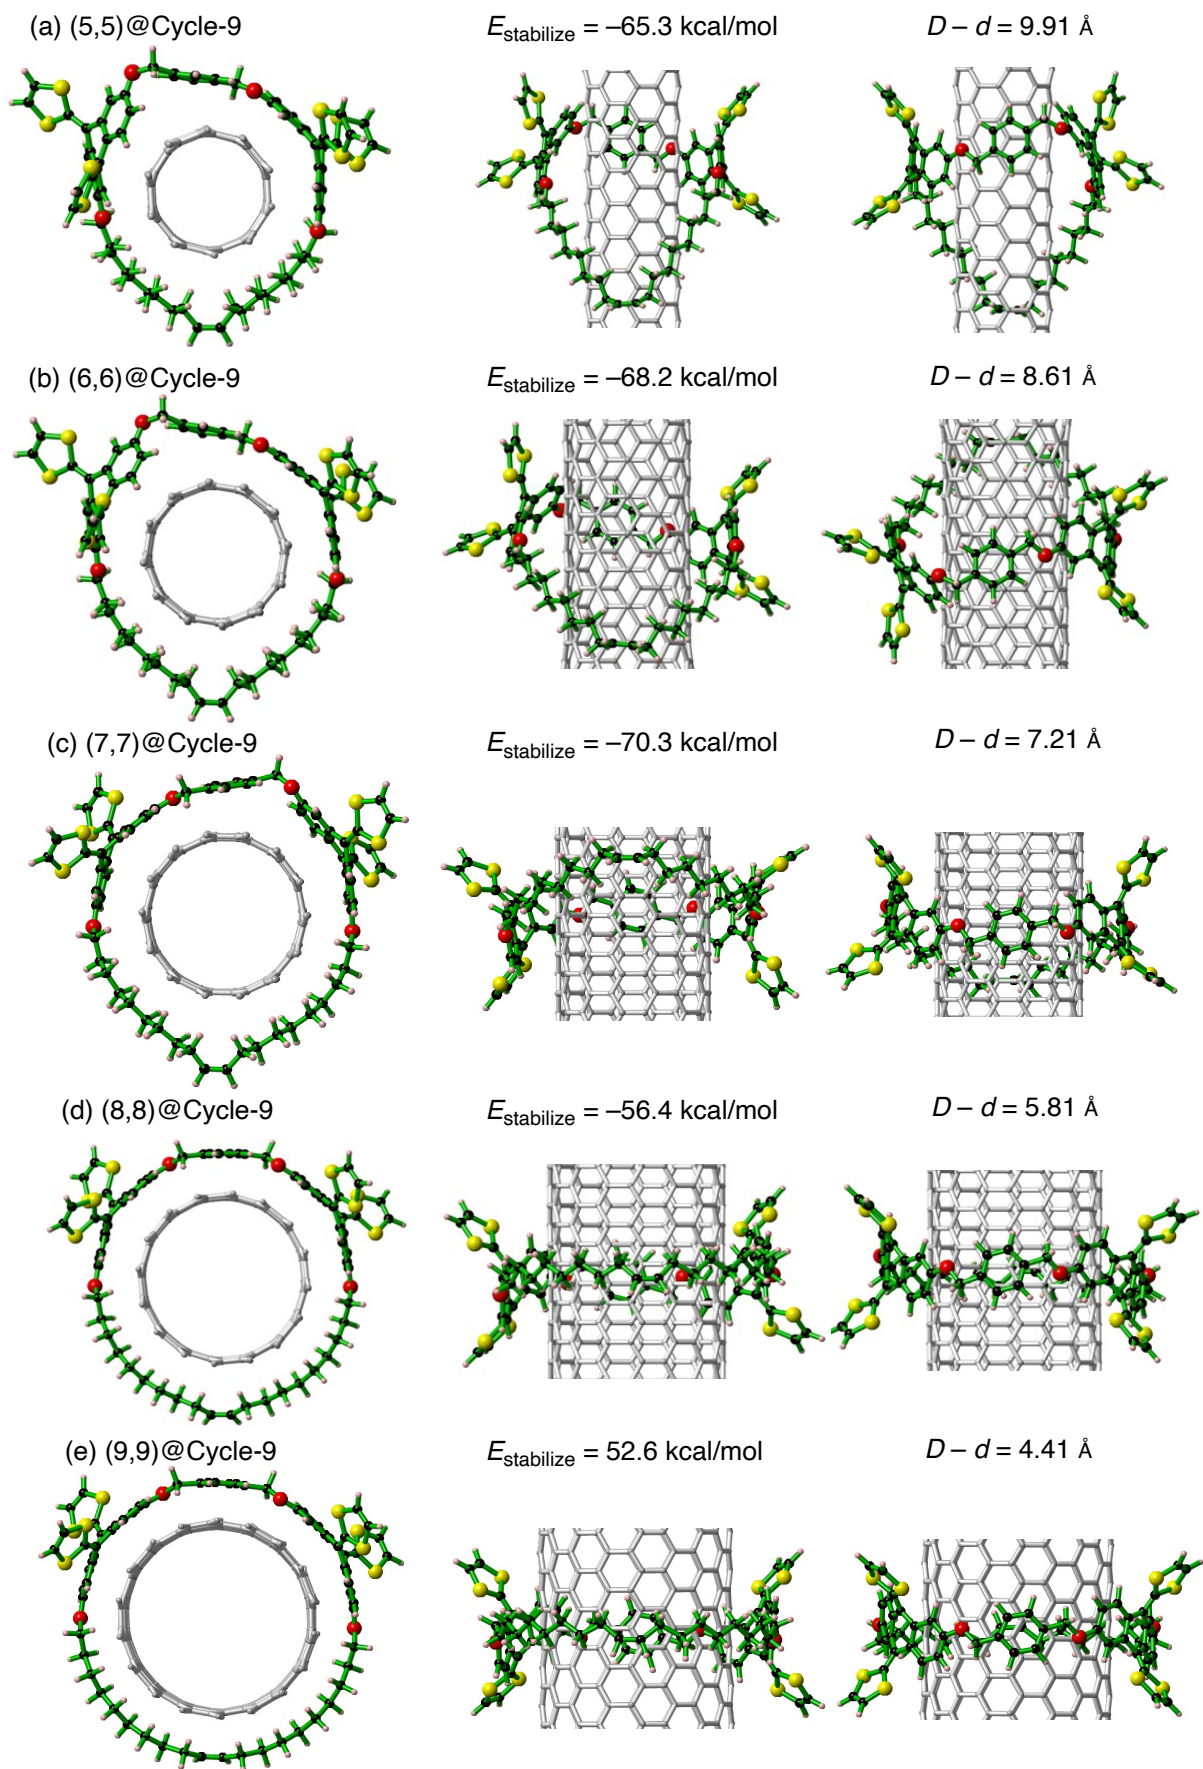

**Fig. S8** Optimized structures for an  $(a,a)$  tube inside the macrocycle formed by ring-closing metathesis of UP-9- $(a,a)$  ( $(a,a)$ @Cycle-9): (a)  $a = 5$ , (b)  $a = 6$ , (c)  $a = 7$ , (d)  $a = 8$ , and (e)  $a = 9$ . Their stabilization energies ( $E_{\text{stabilize}}$  values) and  $D - d$  values are given.

(10,10)@Cycle-9

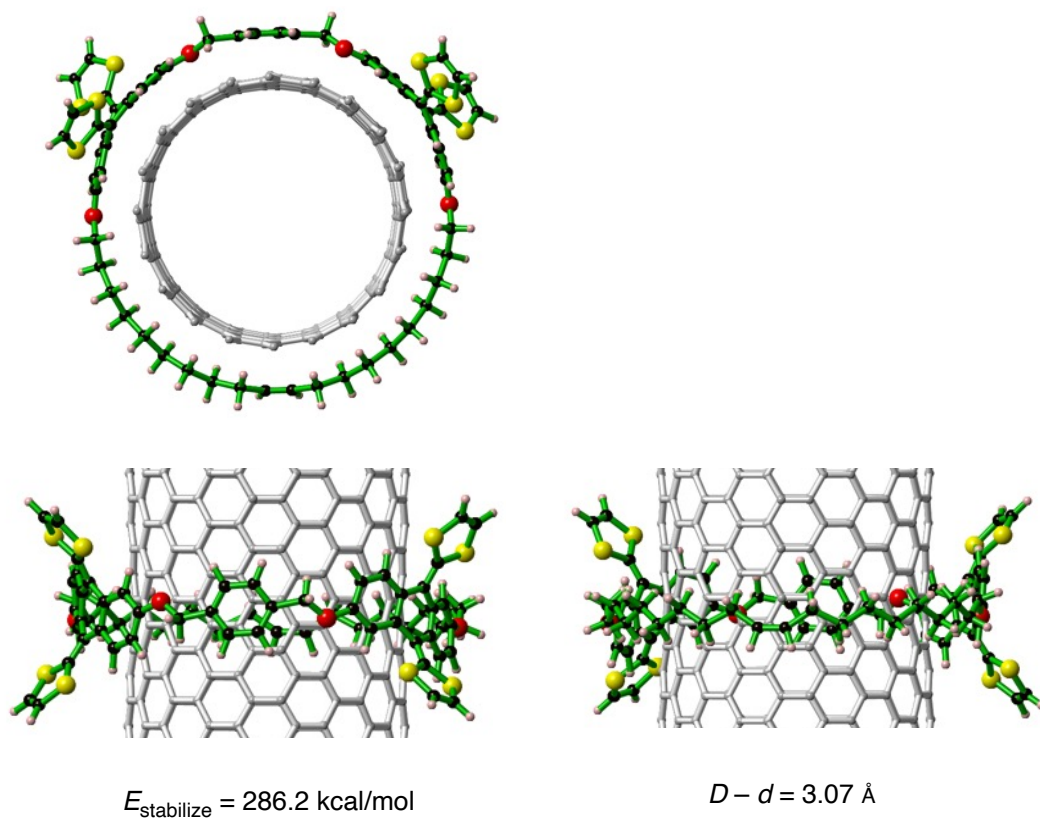

**Fig. S9** Optimized structures for (10,10)@Cycle-9. Their stabilization energies ( $E_{\text{stabilize}}$  values) and  $D - d$  values are given.



## 7. Optimized structures for $(a,b)$ @Cycle- $n$

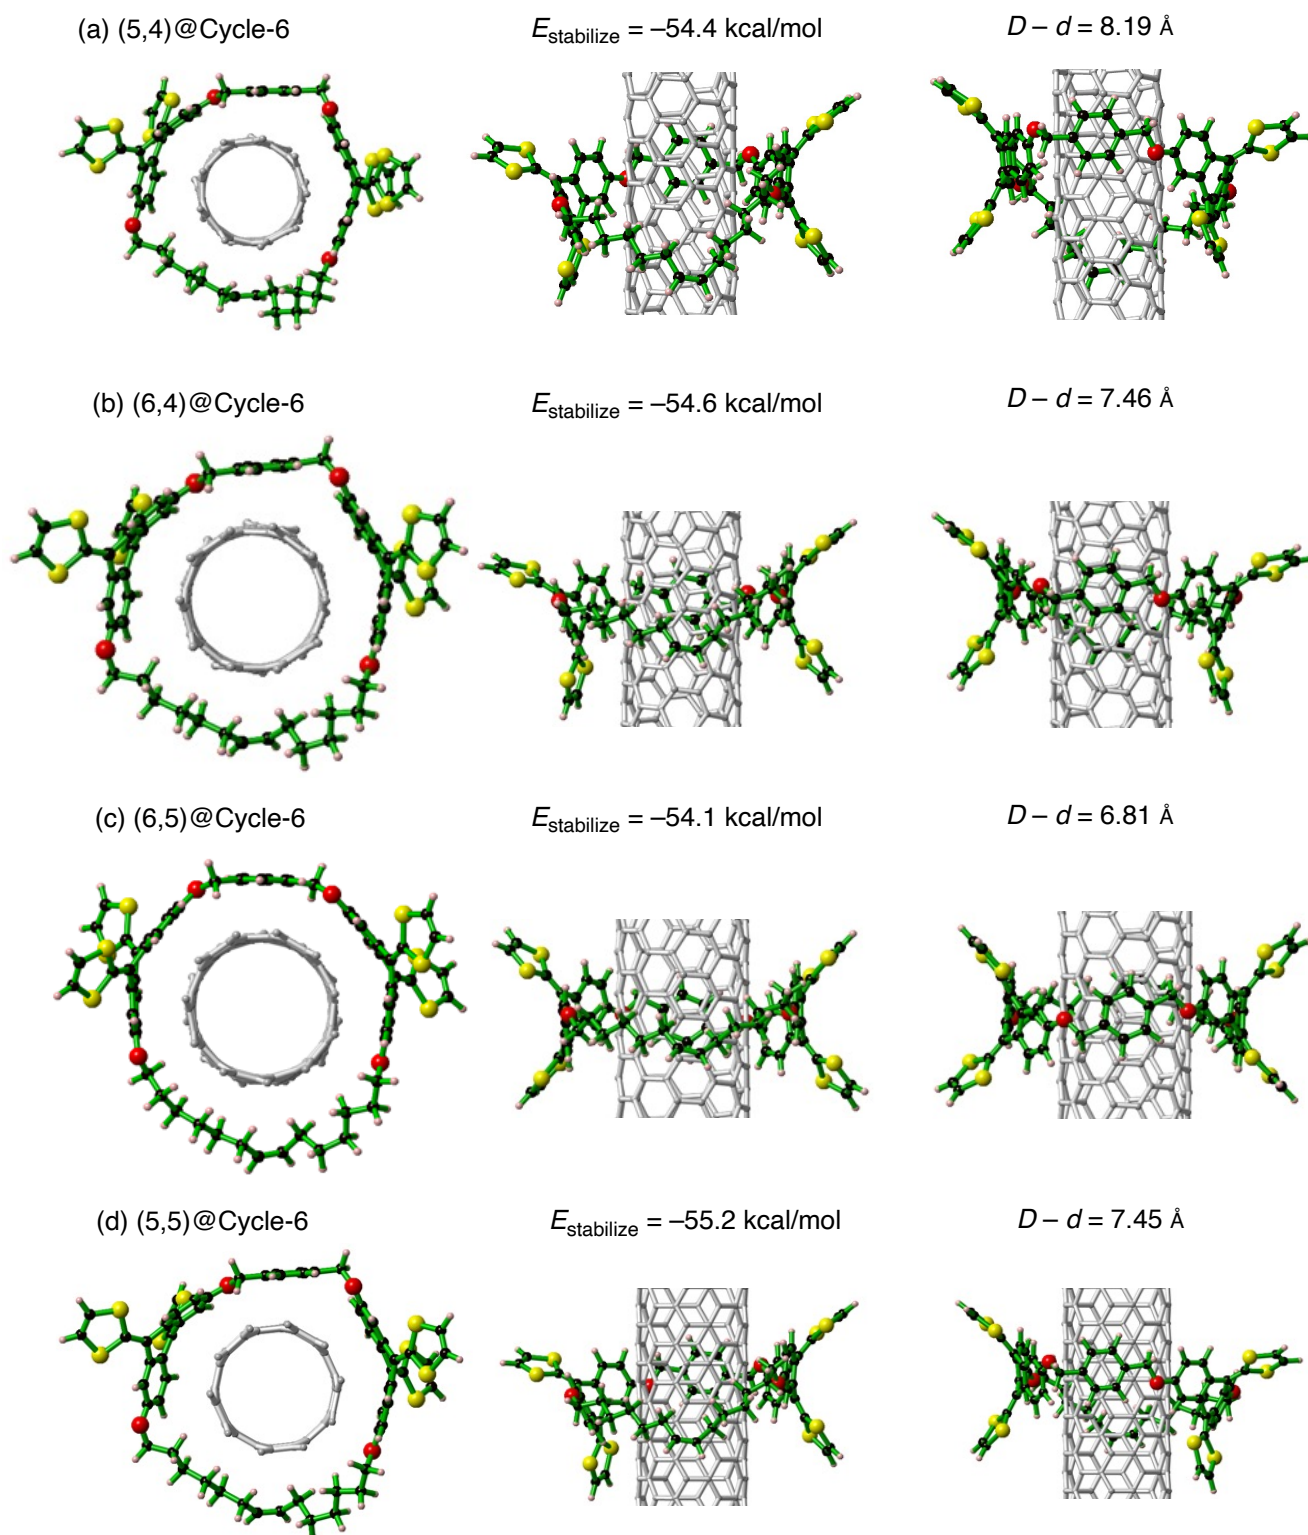

**Fig. S10** Optimized  $(a,b)$ @Cycle-6 structures having tube chirality near that of the armchair tube of the most stable (5,5)@Cycle-6 at  $n = 6$ : (a)  $(a,b) = (5,4)$ , (b)  $(a,b) = (6,4)$ , and (c)  $(a,b) = (6,5)$ . For comparison, the (5,5)@Cycle-6 structure is also given in (d). Their stabilization energies ( $E_{\text{stabilize}}$  values) and  $D - d$  values are given.

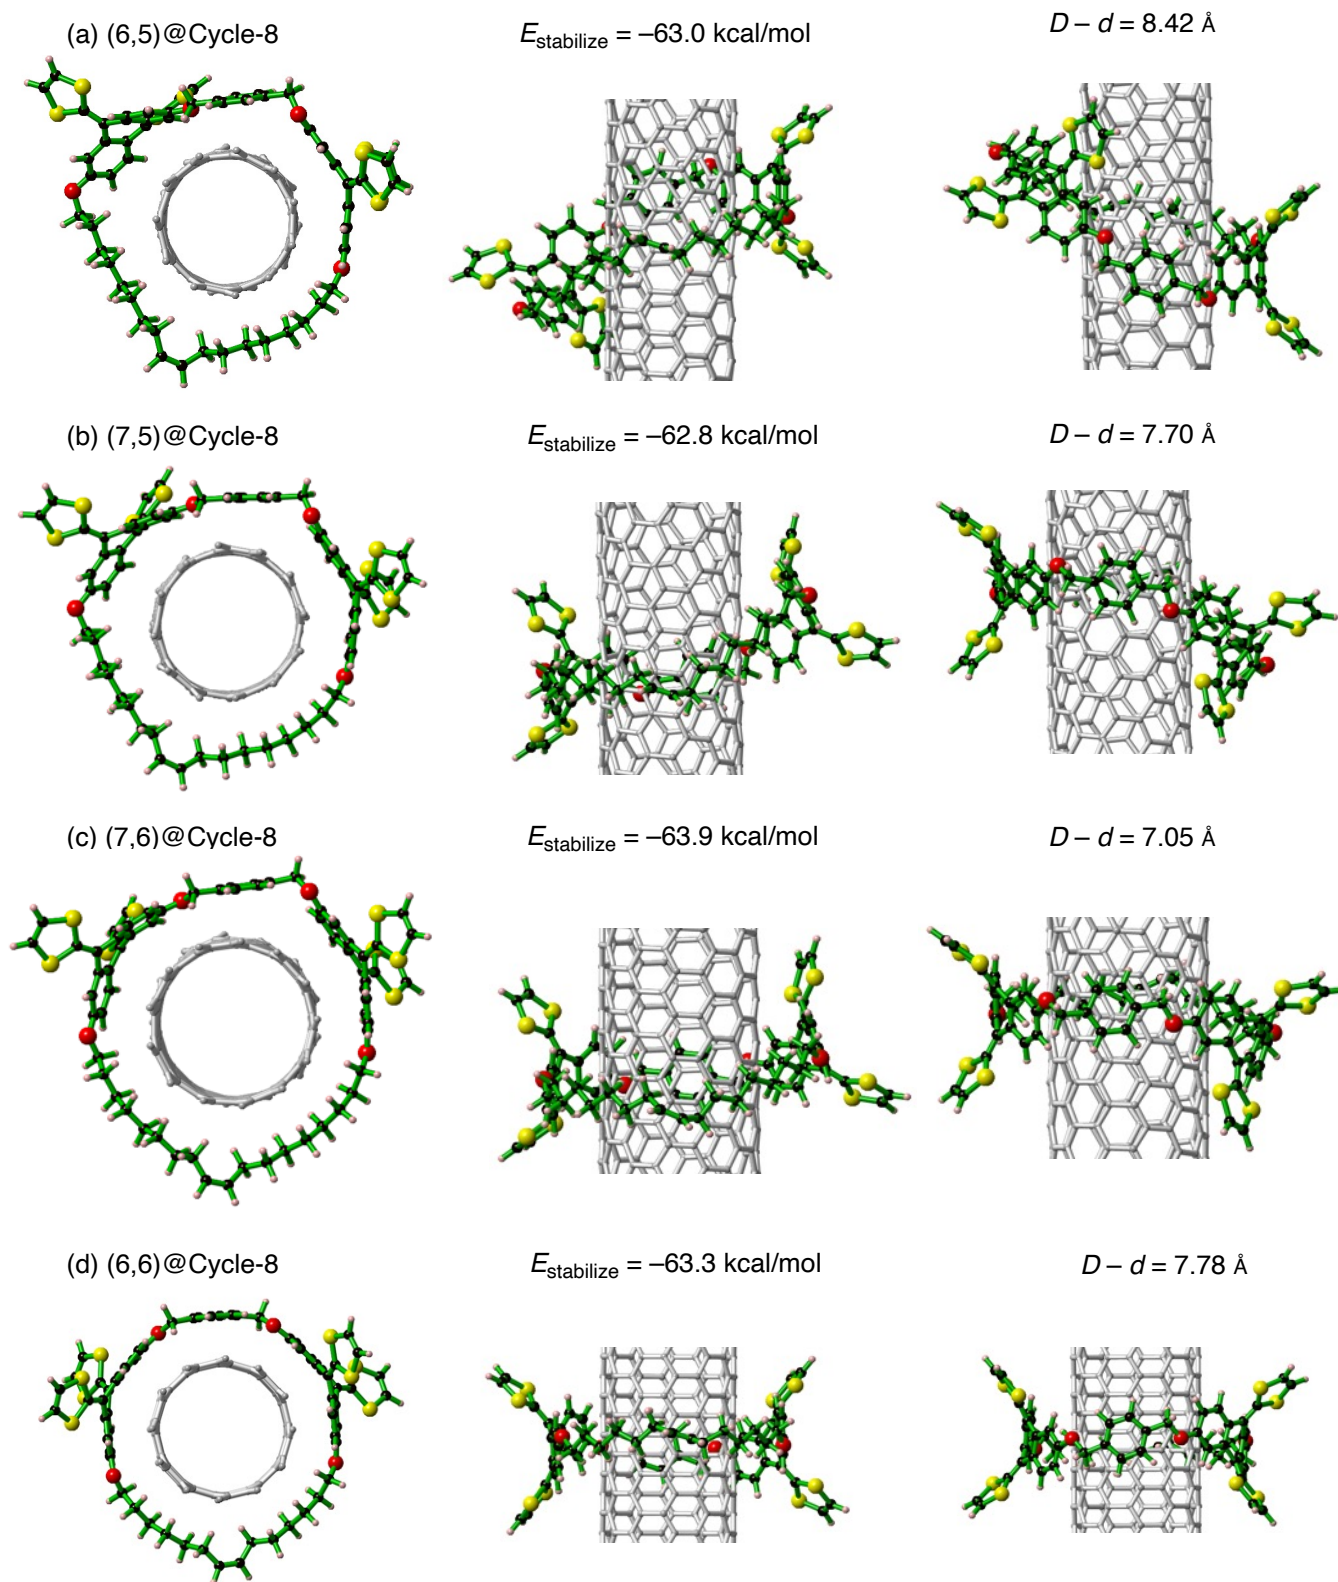

**Fig. S11** Optimized  $(a,b)$ @Cycle-8 structures having tube chirality near that of the armchair tube of the most stable (6,6)@Cycle-8 at  $n = 8$ : (a)  $(a,b) = (6,5)$ , (b)  $(a,b) = (7,5)$ , and (c)  $(a,b) = (7,6)$ . For comparison, the (6,6)@Cycle-8 structure is also given in (d). Their stabilization energies ( $E_{\text{stabilize}}$  values) and  $D - d$  values are given.



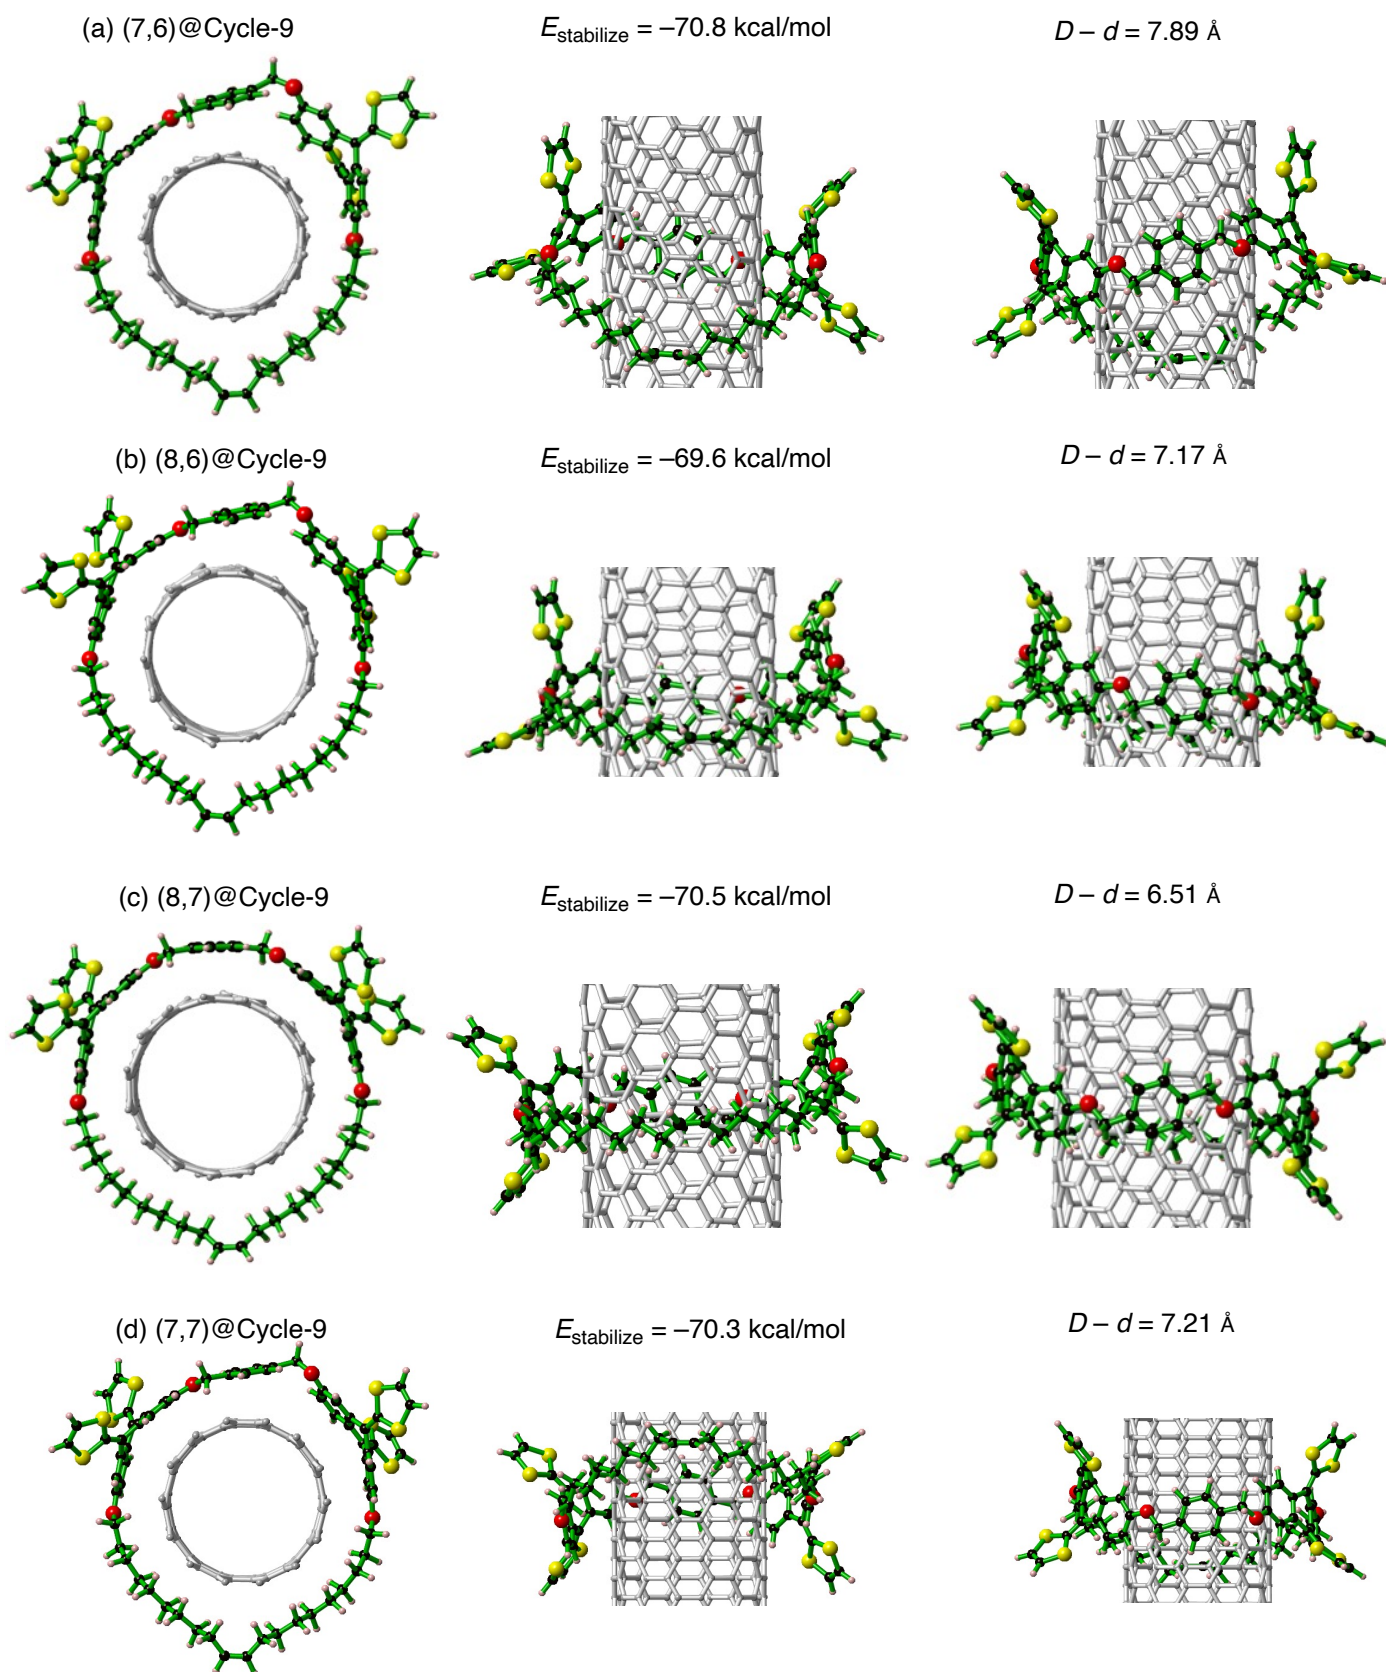

**Fig. S12** Optimized  $(a,b)$ @Cycle-9 structures having tube chirality near that of the armchair tube of the most stable  $(7,7)$ @Cycle-9 at  $n = 9$ : (a)  $(a,b) = (7,6)$ , (b)  $(a,b) = (8,6)$ , and (c)  $(a,b) = (8,7)$ . For comparison, the  $(7,7)$ @Cycle-9 structure is also given in (d). Their stabilization energies ( $E_{\text{stabilize}}$  values) and  $D - d$  values are given.

## 8. Optimized lengths of $sp^3$ CC bonds in the macrocycle in $(a,a)@Cycle-n$

With respect to the macrocycle deformation in the  $(a,a)@Cycle-n$  structures whose  $D - d$  values are less than 5 Å, we found significant elongation of  $sp^3$  CC bonds in alkyl chains (up to 1.67 Å), relative to those of structures whose  $D - d$  values are larger than 5 Å (around 1.55 Å, being close to the typical  $sp^3$  CC bonds<sup>59</sup>), as shown in Table S2. The  $sp^3$  CC bond elongation in alkyl chains causes high energy penalty, although it partially reduces the number of atom contacts between which repulsive CH- $\pi$  and  $\pi$ - $\pi$  interactions operate in  $(m,m)@Cycle-n$  structures. As a result, the  $(m,m)@Cycle-n$  structures whose  $D - d$  values are less than 5 Å are destabilized.

**Table S2.** Optimized lengths in Å of  $sp^3$  CC bonds in the macrocycle in  $(m,m)@Cycle-n$

|                                                            |                                                                                                                   |
|------------------------------------------------------------|-------------------------------------------------------------------------------------------------------------------|
| <b>(5,5)@Cycle-6</b><br><b>(<math>D-d = 7.45</math> Å)</b> | 1.538, 1.542, 1.542, 1.536, 1.544, 1.508, 1.510, 1.552, 1.540, 1.543, 1.541, 1.527                                |
| <b>(6,6)@Cycle-6</b><br><b>(<math>D-d = 6.15</math> Å)</b> | 1.536, 1.549, 1.548, 1.547, 1.558, 1.513, 1.510, 1.561, 1.554, 1.544, 1.549, 1.535                                |
| <b>(7,7)@Cycle-6</b><br><b>(<math>D-d = 4.75</math> Å)</b> | 1.581, 1.601, 1.595, 1.596, 1.600, 1.522, 1.541, 1.601, 1.613, 1.587, 1.601, 1.579                                |
| <b>(5,5)@Cycle-8</b><br><b>(<math>D-d = 9.11</math> Å)</b> | 1.530, 1.538, 1.536, 1.535, 1.536, 1.538, 1.546, 1.516, 1.508, 1.544, 1.539, 1.535, 1.538,<br>1.538, 1.543, 1.527 |
| <b>(6,6)@Cycle-8</b><br><b>(<math>D-d = 7.74</math> Å)</b> | 1.530, 1.538, 1.537, 1.537, 1.536, 1.538, 1.550, 1.511, 1.507, 1.548, 1.537, 1.537,<br>1.539, 1.539, 1.544, 1.528 |
| <b>(7,7)@Cycle-8</b><br><b>(<math>D-d = 6.37</math> Å)</b> | 1.535, 1.550, 1.543, 1.548, 1.548, 1.541, 1.553, 1.512, 1.513, 1.555, 1.545, 1.546,<br>1.548, 1.549, 1.550, 1.535 |
| <b>(8,8)@Cycle-8</b><br><b>(<math>D-d = 4.99</math> Å)</b> | 1.569, 1.583, 1.584, 1.581, 1.580, 1.585, 1.584, 1.541, 1.538, 1.590, 1.581, 1.575,<br>1.603, 1.576, 1.585, 1.566 |

|                                                 |                                                                                                                                 |
|-------------------------------------------------|---------------------------------------------------------------------------------------------------------------------------------|
| <b>(9,9)@Cycle-8</b><br><b>(D-d = 3.61 Å)</b>   | 1.632, 1.657, 1.638, 1.684, 1.646, 1.644, 1.665, 1.596, 1.595, 1.664, 1.642, 1.649,<br>1.651, 1.652, 1.646, 1.628               |
| <b>(5,5)@Cycle-9</b><br><b>(D-d = 9.25 Å)</b>   | 1.525, 1.539, 1.536, 1.538, 1.536, 1.536, 1.536, 1.551, 1.509, 1.510, 1.550, 1.537,<br>1.536, 1.536, 1.539, 1.537, 1.541, 1.525 |
| <b>(6,6)@Cycle-9</b><br><b>(D-d = 8.58 Å)</b>   | 1.526, 1.544, 1.538, 1.539, 1.538, 1.536, 1.538, 1.549, 1.508, 1.508, 1.550, 1.537,<br>1.537, 1.537, 1.539, 1.538, 1.540, 1.526 |
| <b>(7,7)@Cycle-9</b><br><b>(D-d = 7.21 Å)</b>   | 1.527, 1.541, 1.539, 1.538, 1.538, 1.537, 1.536, 1.547, 1.507, 1.507, 1.549, 1.535,<br>1.537, 1.538, 1.540, 1.540, 1.544, 1.528 |
| <b>(8,8)@Cycle-9</b><br><b>(D-d = 5.32 Å)</b>   | 1.545, 1.555, 1.556, 1.553, 1.555, 1.555, 1.550, 1.557, 1.520, 1.520, 1.557, 1.551,<br>1.553, 1.554, 1.554, 1.555, 1.553, 1.540 |
| <b>(9,9)@Cycle-9</b><br><b>(D-d = 4.45 Å)</b>   | 1.597, 1.600, 1.600, 1.596, 1.601, 1.602, 1.598, 1.609, 1.561, 1.559, 1.610, 1.595,<br>1.599, 1.600, 1.599, 1.600, 1.596, 1.583 |
| <b>(10,10)@Cycle-9</b><br><b>(D-d = 3.07 Å)</b> | 1.658, 1.680, 1.676, 1.682, 1.679, 1.683, 1.673, 1.695, 1.627, 1.628, 1.689, 1.679,<br>1.684, 1.681, 1.674, 1.680, 1.682, 1.669 |



## 9. Full lists in Refs. 32 and 39

(32) Balakrishna, B.; Menon, A.; Cao, K.; Gsänger, S.; Beil, S. B.; Villalva, J.; Shyshov, O.; Martin, O.; Hirsch, A.; Meyer, B.; Kaiser, U.; Guldi, D. M.; von Delius, M. Dynamic Covalent Formation of Concave Disulfide Macrocycles Mechanically Interlocked with Single-Walled Carbon Nanotubes. *Angew. Chem. Int. Ed.* **2020**, *59*, 18774-18785.

(39) Frisch, M. J.; Trucks, G. W.; Schlegel, H. B.; Scuseria, G. E.; Robb, M. A.; Cheeseman, J. R.; Scalmani, G.; Barone, V.; Petersson, G. A.; Nakatsuji, H.; Li, X.; Caricato, M.; Marenich, A. V.; Bloino, J.; Janesko, B. G.; Gomperts, R.; Mennucci, B.; Hratchian, H. P.; Ortiz, J. V.; Izmaylov, A. F.; Sonnenberg, J. L.; Williams-Young, D.; Ding, F.; Lipparini, F.; Egidi, F.; Goings, J.; Peng, B.; Petrone, A.; Henderson, T.; Ranasinghe, D.; Zakrzewski, V. G.; Gao, J.; Rega, N.; Zheng, G.; Liang, W.; Hada, M.; Ehara, M.; Toyota, K.; Fukuda, R.; Hasegawa, J.; Ishida, M.; Nakajima, T.; Honda, Y.; Kitao, O.; Nakai, H.; Vreven, T.; Throssell, K.; Montgomery, J. A., Jr.; Peralta, J. E.; Ogliaro, F.; Bearpark, M. J.; Heyd, J. J.; Brothers, E. N.; Kudin, K. N.; Staroverov, V. N.; Keith, T. A.; Kobayashi, R.; Normand, J.; Raghavachari, K.; Rendell, A. P.; Burant, J. C.; Iyengar, S. S.; Tomasi, J.; Cossi, M.; Millam, J. M.; Klene, M.; Adamo, C.; Cammi, R.; Ochterski, J. W.; Martin, R. L.; Morokuma, K.; Farkas, O.; Foresman, J. B.; Fox, D. J. Gaussian, Inc., Wallingford CT, 2016.

## 10. Energies of the optimized geometries, and their Cartesian Coordinates.

10-1. Energies in the optimized geometries for discussion in the main text.

|                 | Total energy in Hartree | BSSE-corrected energy in Hartree |
|-----------------|-------------------------|----------------------------------|
| UP-6            | -5958.00923548          | –                                |
| UP-8            | -6115.15997155          | –                                |
| UP-9            | -6193.73532113          | –                                |
| (5,5) tube      | -7247.38118947          | –                                |
| (6,6) tube      | -8697.28297945          | –                                |
| (7,7) tube      | -10147.1292194          | –                                |
| (8,8) tube      | -11596.9407313          | –                                |
| (9,9) tube      | -13046.7297408          | –                                |
| (10,10) tube    | -14496.5026810          | –                                |
| UP-6-(5,5)      | -13205.5257409          | -13205.491852397500              |
| UP-6-(6,6)      | -14655.4310638          | -14655.396681160210              |
| UP-6-(7,7)      | -16105.2864605          | -16105.251385023850              |
| UP-8-(5,5)      | -13362.689183           | -13362.653067247770              |
| UP-8-(6,6)      | -14812.5918457          | -14812.556456221300              |
| UP-8-(7,7)      | -16262.4447298          | -16262.407426582130              |
| UP-8-(8,8)      | -17712.2637525          | -17712.225754807740              |
| UP-8-(9,9)      | -19162.0545704          | -19162.016247263110              |
| UP-9-(5,5)      | -13441.2633574          | -13441.226911963220              |
| UP-9-(6,6)      | -14891.1724287          | -14891.137453582830              |
| UP-9-(7,7)      | -16341.0319202          | -16340.993122401110              |
| UP-9-(8,8)      | -17790.8417152          | -17790.802192140280              |
| UP-9-(9,9)      | -19240.6387520          | -19240.599589668050              |
| (5,5)@Cycle-6   | -13126.9756320          | -13126.943786812360              |
| (6,6)@Cycle-6   | -14576.8723805          | -14576.837236124260              |
| (7,7)@Cycle-6   | -16026.5872053          | -16026.543418953310              |
| (5,5)@Cycle-8   | -13284.1302190          | -13284.099701150940              |
| (6,6)@Cycle-8   | -14734.0418430          | -14734.009219679890              |
| (7,7)@Cycle-8   | -16183.8795256          | -16183.843035624120              |
| (8,8)@Cycle-8   | -17633.6034411          | -17633.558970019310              |
| (9,9)@Cycle-8   | -19083.1024704          | -19083.039120635000              |
| (5,5)@Cycle-9   | -13362.7201932          | -13362.685955405160              |
| (6,6)@Cycle-9   | -14812.6268124          | -14812.592379092070              |
| (7,7)@Cycle-9   | -16262.4771228          | -16262.441978316810              |
| (8,8)@Cycle-9   | -17712.2721613          | -17712.231320724580              |
| (9,9)@Cycle-9   | -19161.8967911          | -19161.846638860670              |
| (10,10)@Cycle-9 | -20611.3026259          | -20611.236189032180              |

10-2. Cartesian coordinates of the optimized geometries listed in the above table.

**UP-6**

|   |              |             |             |
|---|--------------|-------------|-------------|
| C | 0.49688500   | -1.15647300 | -3.16371900 |
| C | -0.88454600  | -1.02737600 | -2.95403900 |
| C | -1.45969200  | -1.42451000 | -1.73695100 |
| C | -0.62931600  | -1.94610400 | -0.72489500 |
| C | 0.74672100   | -2.07421900 | -0.93368200 |
| C | 1.32273100   | -1.68416600 | -2.15919800 |
| H | 0.93747800   | -0.83438300 | -4.10920900 |
| H | -1.51791800  | -0.60536800 | -3.73670500 |
| H | -1.07206200  | -2.23582100 | 0.22809000  |
| H | 1.39003700   | -2.46451700 | -0.14484600 |
| C | 2.80257400   | -1.86653700 | -2.40142200 |
| H | 3.10874900   | -1.37548200 | -3.34214800 |
| H | 3.05454700   | -2.94047400 | -2.48711000 |
| C | -2.95405100  | -1.33441100 | -1.53397200 |
| H | -3.42042100  | -0.73670900 | -2.33701100 |
| H | -3.41386400  | -2.34041900 | -1.55759200 |
| O | 3.52402900   | -1.30557900 | -1.29094500 |
| O | -3.21289200  | -0.73333800 | -0.25254500 |
| C | -4.51360100  | -0.70597800 | 0.18229700  |
| C | -5.61818100  | -1.10758400 | -0.58943600 |
| C | -4.71490100  | -0.19869300 | 1.48050600  |
| C | -6.92186000  | -1.05768500 | -0.05625600 |
| H | -5.48278300  | -1.41445400 | -1.62312300 |
| C | -6.00915800  | -0.11241500 | 1.99510400  |
| H | -3.85418300  | 0.14462800  | 2.05308400  |
| C | -8.11774300  | -1.46143100 | -0.83295900 |
| C | -7.13023500  | -0.55434700 | 1.26071400  |
| H | -6.15549800  | 0.33686200  | 2.97696300  |
| C | -9.28333400  | -0.57327800 | -0.61180800 |
| C | -8.52368800  | -0.46744600 | 1.75712600  |
| C | -10.15480300 | -0.16000400 | -1.63331400 |
| C | -9.49179500  | -0.06297200 | 0.70973400  |
| C | -11.23543500 | 0.70005400  | -1.38707200 |
| H | -9.97142600  | -0.48393600 | -2.65756400 |

|   |              |             |             |
|---|--------------|-------------|-------------|
| C | -10.55211600 | 0.82257300  | 0.94712700  |
| C | -11.43704900 | 1.19259200  | -0.08497500 |
| H | -11.88332900 | 0.99657500  | -2.20882300 |
| H | -10.69153800 | 1.27999800  | 1.92510600  |
| C | 4.88630700   | -1.47006000 | -1.27495000 |
| C | 5.54149300   | -0.93687600 | -0.14777200 |
| C | 5.63577800   | -2.08182100 | -2.29539800 |
| C | 6.93126200   | -1.04480600 | -0.00082000 |
| H | 4.93979800   | -0.40375400 | 0.58633600  |
| C | 7.03073100   | -2.16095800 | -2.16489200 |
| H | 5.16009900   | -2.46476600 | -3.19547200 |
| C | 7.66922600   | -0.49088600 | 1.15930300  |
| C | 7.70156100   | -1.67514700 | -1.03044800 |
| H | 7.60698800   | -2.58020900 | -2.98925000 |
| C | 8.96097200   | 0.13148500  | 0.78507900  |
| C | 9.17286800   | -1.72308000 | -0.86204400 |
| C | 9.44218000   | 1.32669000  | 1.34529200  |
| C | 9.72988900   | -0.49411400 | -0.24797600 |
| C | 10.66194500  | 1.89580600  | 0.94959300  |
| H | 8.83841000   | 1.85261500  | 2.08446400  |
| C | 10.93162500  | 0.09390900  | -0.66602100 |
| C | 11.41394500  | 1.27208500  | -0.06237200 |
| H | 10.99482000  | 2.82417200  | 1.40824700  |
| H | 11.50025500  | -0.32322700 | -1.49545700 |
| O | 12.60344700  | 1.73999400  | -0.55570600 |
| O | -12.43497000 | 2.05754600  | 0.27930900  |
| C | -8.89617100  | -0.83495400 | 3.02825900  |
| S | -10.59511700 | -0.85386600 | 3.61984900  |
| C | -8.98257400  | -2.03620700 | 5.38637400  |
| C | -10.26715100 | -1.75054600 | 5.09934900  |
| H | -8.64327300  | -2.56511500 | 6.27477000  |
| H | -11.11987400 | -2.01477500 | 5.72162200  |
| C | -8.17105500  | -2.60420200 | -1.59477600 |
| S | -9.66056700  | -3.18613400 | -2.42051000 |
| C | -7.75619600  | -5.05238000 | -2.51876200 |
| C | -9.04436200  | -4.78918800 | -2.81034800 |

|   |              |             |             |
|---|--------------|-------------|-------------|
| H | -7.24858300  | -5.99297000 | -2.72315300 |
| H | -9.73177900  | -5.48612700 | -3.28566300 |
| C | 7.25148600   | -0.64002800 | 2.46016800  |
| S | 5.74680100   | -1.49714300 | 2.94881700  |
| C | 7.24879600   | -0.96191000 | 5.08799400  |
| C | 6.13245200   | -1.58537800 | 4.66482700  |
| H | 7.58916300   | -0.92255200 | 6.12082500  |
| H | 5.43697900   | -2.12436000 | 5.30513400  |
| C | 9.92875400   | -2.83623500 | -1.14170400 |
| S | 11.69641300  | -2.96279600 | -0.83085500 |
| C | 10.69181500  | -5.34949900 | -1.47501100 |
| C | 11.80146100  | -4.70496100 | -1.06600000 |
| H | 10.62722700  | -6.41706900 | -1.67566900 |
| H | 12.76655200  | -5.17489000 | -0.88718000 |
| C | 13.12547200  | 2.95726400  | -0.00159500 |
| H | 13.27901200  | 2.83880300  | 1.08677900  |
| H | 12.40098000  | 3.77892700  | -0.15119500 |
| C | 14.44457900  | 3.26377800  | -0.70379600 |
| H | 15.13221900  | 2.41590100  | -0.55706400 |
| H | 14.26140500  | 3.34789200  | -1.78669600 |
| C | 15.08516800  | 4.55827600  | -0.17614300 |
| H | 15.25409200  | 4.47125300  | 0.91125200  |
| H | 14.38634100  | 5.40119700  | -0.31696000 |
| C | 16.41709500  | 4.88241300  | -0.87139600 |
| H | 17.11561300  | 4.03938100  | -0.73103800 |
| H | 16.24933200  | 4.96934100  | -1.95899900 |
| C | 17.06571300  | 6.17458500  | -0.35066900 |
| H | 17.23805900  | 6.09314700  | 0.73539900  |
| H | 16.36878800  | 7.01839600  | -0.49480600 |
| C | 18.40580000  | 6.49140500  | -1.05269800 |
| H | 19.11147100  | 5.65985000  | -0.89110900 |
| H | 18.21979500  | 6.54778000  | -2.14107300 |
| C | -13.34183100 | 2.50122000  | -0.74164300 |
| H | -13.85365300 | 1.63138800  | -1.19286700 |
| H | -12.78099100 | 3.01463400  | -1.54428800 |
| C | -14.34965600 | 3.44689500  | -0.09586900 |

|   |              |             |             |
|---|--------------|-------------|-------------|
| H | -14.87294600 | 2.91314200  | 0.71314800  |
| H | -13.80605800 | 4.28497200  | 0.36823600  |
| C | -15.36635100 | 3.98072200  | -1.11851500 |
| H | -15.89877200 | 3.13499500  | -1.58737600 |
| H | -14.83315800 | 4.50320200  | -1.93182500 |
| C | -16.39089900 | 4.93741300  | -0.48799000 |
| H | -16.92481100 | 4.41532100  | 0.32482200  |
| H | -15.85933500 | 5.78298400  | -0.01788300 |
| C | -17.40987500 | 5.47719600  | -1.50375200 |
| H | -17.94678400 | 4.63715700  | -1.97488400 |
| H | -16.87582200 | 6.00189700  | -2.31491700 |
| C | -18.43718900 | 6.43741100  | -0.86214200 |
| H | -18.98824700 | 5.90890900  | -0.06678700 |
| H | -17.88229300 | 7.26069700  | -0.37569900 |
| S | 8.21903000   | -0.11792300 | 3.88473400  |
| S | 9.23882700   | -4.38886900 | -1.73528900 |
| S | -7.75140200  | -1.48782200 | 4.25350100  |
| S | -6.80821200  | -3.76863400 | -1.77318400 |
| C | 19.01815100  | 7.78249000  | -0.57305500 |
| H | 18.41616700  | 8.68423600  | -0.73343100 |
| C | 20.20344100  | 7.88779600  | 0.04455600  |
| H | 20.82593600  | 7.00729900  | 0.22457100  |
| H | 20.59166800  | 8.84933100  | 0.38498500  |
| C | -19.40730300 | 7.00179300  | -1.86826700 |
| H | -18.96423600 | 7.59110400  | -2.67923300 |
| C | -20.73385700 | 6.80862200  | -1.84848200 |
| H | -21.38834000 | 7.23008200  | -2.61345300 |
| H | -21.20670500 | 6.22167000  | -1.05660000 |

**UP-8**

|   |             |             |             |
|---|-------------|-------------|-------------|
| C | 0.48187600  | -1.46878600 | -3.19206400 |
| C | -0.89799800 | -1.35310100 | -2.96475600 |
| C | -1.46734800 | -1.84289800 | -1.77916200 |
| C | -0.63290500 | -2.44516700 | -0.81638300 |
| C | 0.74148400  | -2.55997200 | -1.04267100 |
| C | 1.31180400  | -2.07558800 | -2.23685800 |

|   |              |             |             |
|---|--------------|-------------|-------------|
| H | 0.91814600   | -1.07435400 | -4.11178300 |
| H | -1.53458200  | -0.86913700 | -3.70794800 |
| H | -1.07101500  | -2.80784000 | 0.11352900  |
| H | 1.38805600   | -3.01274300 | -0.29071900 |
| C | 2.79047100   | -2.23869900 | -2.49900700 |
| H | 3.09156200   | -1.68114000 | -3.40359000 |
| H | 3.04355900   | -3.30334900 | -2.66215700 |
| C | -2.95955800  | -1.76140100 | -1.55809300 |
| H | -3.43005500  | -1.11006600 | -2.31568300 |
| H | -3.42434100  | -2.76173600 | -1.64340900 |
| O | 3.51622000   | -1.75696700 | -1.35454700 |
| O | -3.20403800  | -1.24472300 | -0.23744400 |
| C | -4.50163200  | -1.23277200 | 0.20720300  |
| C | -5.61508900  | -1.57432400 | -0.58052100 |
| C | -4.68956500  | -0.80630100 | 1.53615000  |
| C | -6.91486400  | -1.54412900 | -0.03642900 |
| H | -5.48942500  | -1.81784500 | -1.63216600 |
| C | -5.97959300  | -0.73923900 | 2.06401100  |
| H | -3.82173500  | -0.50816300 | 2.12312100  |
| C | -8.11990700  | -1.88515800 | -0.82883600 |
| C | -7.10987300  | -1.12212600 | 1.31081200  |
| H | -6.11493200  | -0.35055200 | 3.07291100  |
| C | -9.27360900  | -0.99923800 | -0.54512100 |
| C | -8.49940900  | -1.05091800 | 1.82073700  |
| C | -10.14552600 | -0.51252500 | -1.53328400 |
| C | -9.46869200  | -0.57040200 | 0.80703500  |
| C | -11.21418800 | 0.34308700  | -1.22687100 |
| H | -9.97153100  | -0.77312900 | -2.57701700 |
| C | -10.51699000 | 0.31076800  | 1.10619400  |
| C | -11.40274000 | 0.75560200  | 0.10472600  |
| H | -11.86290100 | 0.69811300  | -2.02440500 |
| H | -10.64579500 | 0.70657900  | 2.11214900  |
| C | 4.87962400   | -1.91233200 | -1.35977400 |
| C | 5.53936700   | -1.45545600 | -0.20214700 |
| C | 5.62568100   | -2.44473600 | -2.42619500 |
| C | 6.93101800   | -1.56189200 | -0.07337500 |

|   |              |             |             |
|---|--------------|-------------|-------------|
| H | 4.93932800   | -0.98063500 | 0.57223600  |
| C | 7.02220600   | -2.52134300 | -2.31168800 |
| H | 5.14577800   | -2.76740500 | -3.34743200 |
| C | 7.67371300   | -1.08518200 | 1.11758400  |
| C | 7.69813700   | -2.11086300 | -1.15083000 |
| H | 7.59557700   | -2.87748600 | -3.16720300 |
| C | 8.95687800   | -0.42598700 | 0.77864100  |
| C | 9.17122500   | -2.15706300 | -0.99745800 |
| C | 9.43186800   | 0.73117500  | 1.41830500  |
| C | 9.72258700   | -0.96941200 | -0.30216800 |
| C | 10.64301700  | 1.33853100  | 1.05458800  |
| H | 8.82955600   | 1.19749600  | 2.19759800  |
| C | 10.91530400  | -0.34154300 | -0.68693700 |
| C | 11.39228300  | 0.79536700  | -0.00485500 |
| H | 10.97088300  | 2.23531400  | 1.57537500  |
| H | 11.48038200  | -0.69264600 | -1.54868400 |
| O | 12.57349800  | 1.30861900  | -0.47233100 |
| O | -12.38762100 | 1.60848400  | 0.52797100  |
| C | -8.86892700  | -1.49298400 | 3.06875400  |
| S | -10.56458400 | -1.52892600 | 3.66886700  |
| C | -8.95643200  | -2.83801800 | 5.34788000  |
| C | -10.23907200 | -2.51990300 | 5.08757100  |
| H | -8.61849100  | -3.42523000 | 6.19940700  |
| H | -11.09136800 | -2.81237600 | 5.69767500  |
| C | -8.19130700  | -2.97746100 | -1.65991700 |
| S | -9.69280600  | -3.49006200 | -2.50958800 |
| C | -7.81129000  | -5.36826000 | -2.73650200 |
| C | -9.09819500  | -5.07298600 | -3.00173100 |
| H | -7.31620100  | -6.30019300 | -3.00210100 |
| H | -9.79693800  | -5.73149900 | -3.51390100 |
| C | 7.26772600   | -1.32969200 | 2.40766800  |
| S | 5.77395200   | -2.23203500 | 2.84568300  |
| C | 7.28879800   | -1.83645600 | 5.00611100  |
| C | 6.17409800   | -2.43799000 | 4.54823100  |
| H | 7.63710500   | -1.86727700 | 6.03658300  |
| H | 5.48814800   | -3.02681600 | 5.15398200  |



|   |              |             |             |
|---|--------------|-------------|-------------|
| C | 9.93452500   | -3.24046400 | -1.36119100 |
| S | 11.70581800  | -3.37211200 | -1.07381600 |
| C | 10.71691000  | -5.71662100 | -1.87750100 |
| C | 11.82414300  | -5.09223800 | -1.43226400 |
| H | 10.66003800  | -6.76790100 | -2.15266400 |
| H | 12.79473900  | -5.56463300 | -1.29441100 |
| C | 13.08934200  | 2.48674400  | 0.16615400  |
| H | 13.24864300  | 2.29069300  | 1.24242400  |
| H | 12.35775800  | 3.31118000  | 0.07967900  |
| C | 14.40307800  | 2.85560600  | -0.51574600 |
| H | 15.09877800  | 2.00551100  | -0.43422000 |
| H | 14.21575800  | 3.01861900  | -1.58888600 |
| C | 15.03270300  | 4.11299400  | 0.10618000  |
| H | 15.20317900  | 3.94632600  | 1.18414100  |
| H | 14.32544000  | 4.95721900  | 0.02948700  |
| C | 16.36101000  | 4.50284200  | -0.56188800 |
| H | 17.06855300  | 3.65906600  | -0.48524000 |
| H | 16.19174800  | 4.66926900  | -1.63989500 |
| C | 16.99681300  | 5.75894000  | 0.05450100  |
| H | 17.16333200  | 5.59222700  | 1.13312400  |
| H | 16.28860900  | 6.60247400  | -0.02310000 |
| C | 18.32645100  | 6.14860100  | -0.61064400 |
| H | 19.03443500  | 5.30495300  | -0.53291100 |
| H | 18.16079000  | 6.31575300  | -1.68949300 |
| C | -13.29307200 | 2.12636500  | -0.45894300 |
| H | -13.82090500 | 1.29278300  | -0.95768700 |
| H | -12.72833700 | 2.67749600  | -1.23332900 |
| C | -14.28245800 | 3.04837100  | 0.24662600  |
| H | -14.80897700 | 2.47762000  | 1.02782600  |
| H | -13.72365500 | 3.85098400  | 0.75342200  |
| C | -15.29666500 | 3.65358700  | -0.73797300 |
| H | -15.84732700 | 2.84312000  | -1.24661300 |
| H | -14.75966000 | 4.20840400  | -1.52708400 |
| C | -16.29962100 | 4.59449500  | -0.05143100 |
| H | -16.83696100 | 4.04121500  | 0.73823100  |
| H | -15.74903400 | 5.40495500  | 0.45693800  |

|   |              |             |             |
|---|--------------|-------------|-------------|
| C | -17.31657600 | 5.20414400  | -1.02927900 |
| H | -17.86838900 | 4.39292900  | -1.53561200 |
| H | -16.77763300 | 5.75360900  | -1.82098300 |
| C | -18.31680500 | 6.14965400  | -0.34546800 |
| H | -18.85542700 | 5.60074400  | 0.44673900  |
| H | -17.76535100 | 6.96173500  | 0.16019300  |
| S | 8.24254800   | -0.90134400 | 3.85836600  |
| S | 9.25344000   | -4.75351700 | -2.05821800 |
| S | -7.72518900  | -2.23458900 | 4.24341700  |
| S | -6.84320100  | -4.14367000 | -1.92042500 |
| C | -19.33339400 | 6.75821500  | -1.32434200 |
| H | -19.89185000 | 5.95256800  | -1.82931400 |
| H | -18.79535300 | 7.30905500  | -2.11534800 |
| C | -20.33481900 | 7.70870400  | -0.62939900 |
| H | -20.89002800 | 7.15562200  | 0.14617000  |
| H | -19.75837200 | 8.49691100  | -0.11085200 |
| C | 18.96168000  | 7.40452300  | 0.00664500  |
| H | 19.13286600  | 7.24361700  | 1.08401700  |
| H | 18.25622100  | 8.24964100  | -0.07510100 |
| C | 20.29963500  | 7.78765200  | -0.66592300 |
| H | 20.11501100  | 7.92351000  | -1.74756000 |
| H | 21.01414700  | 6.95395200  | -0.56547000 |
| C | 20.89731900  | 9.04561900  | -0.08968200 |
| H | 20.28517700  | 9.95007300  | -0.18235300 |
| C | 22.08102800  | 9.11782800  | 0.53576700  |
| H | 22.71352700  | 8.23344800  | 0.64993100  |
| H | 22.45794200  | 10.05537800 | 0.94826200  |
| C | -21.30152200 | 8.33924400  | -1.59875200 |
| H | -20.85302500 | 8.95591900  | -2.38609400 |
| C | -22.63173300 | 8.17322400  | -1.57553400 |
| H | -23.28350000 | 8.64300800  | -2.31426000 |
| H | -23.11035000 | 7.56029700  | -0.80712500 |

**UP-9**

|   |             |             |             |
|---|-------------|-------------|-------------|
| C | 0.48005500  | -1.77165900 | -3.20399800 |
| C | -0.89907300 | -1.66703200 | -2.96708200 |

|   |              |             |             |
|---|--------------|-------------|-------------|
| C | -1.46124200  | -2.19207500 | -1.79327500 |
| C | -0.62049700  | -2.82049800 | -0.85295800 |
| C | 0.75310200   | -2.92504200 | -1.08883800 |
| C | 1.31639200   | -2.40301400 | -2.27049200 |
| H | 0.91079700   | -1.34864400 | -4.11357400 |
| H | -1.54060800  | -1.16314300 | -3.69252200 |
| H | -1.05272600  | -3.21124500 | 0.06842500  |
| H | 1.40462300   | -3.39740600 | -0.35350900 |
| C | 2.79494700   | -2.54945400 | -2.54423400 |
| H | 3.09167300   | -1.94494500 | -3.41964500 |
| H | 3.05132800   | -3.60336100 | -2.76323100 |
| C | -2.95084500  | -2.11303500 | -1.55607900 |
| H | -3.43156300  | -1.46795700 | -2.31249000 |
| H | -3.41537000  | -3.11450600 | -1.62691900 |
| O | 3.52195600   | -2.12508900 | -1.37852200 |
| O | -3.17881200  | -1.58555900 | -0.23613600 |
| C | -4.47240700  | -1.55598300 | 0.21889400  |
| C | -5.59568600  | -1.89829400 | -0.55448300 |
| C | -4.64507800  | -1.10910100 | 1.54326800  |
| C | -6.89060800  | -1.84615200 | -0.00047300 |
| H | -5.48113900  | -2.15964900 | -1.60312800 |
| C | -5.92989300  | -1.02117900 | 2.08055700  |
| H | -3.76947700  | -0.81126000 | 2.11872400  |
| C | -8.10576900  | -2.18478000 | -0.77842500 |
| C | -7.07027600  | -1.40235300 | 1.34182900  |
| H | -6.05296300  | -0.61679900 | 3.08485000  |
| C | -9.24646300  | -1.28069700 | -0.49939200 |
| C | -8.45493300  | -1.30716600 | 1.86111900  |
| C | -10.11937300 | -0.79733300 | -1.48830300 |
| C | -9.42606400  | -0.82971200 | 0.84769900  |
| C | -11.17449100 | 0.07666500  | -1.18686300 |
| H | -9.95639200  | -1.07524600 | -2.52933600 |
| C | -10.46070600 | 0.06925400  | 1.14140800  |
| C | -11.34777800 | 0.51119200  | 0.13980600  |
| H | -11.82438200 | 0.42848300  | -1.98486200 |
| H | -10.57682600 | 0.48156100  | 2.14227500  |

|   |              |             |             |
|---|--------------|-------------|-------------|
| C | 4.88773800   | -2.25506100 | -1.40274800 |
| C | 5.54886700   | -1.84896900 | -0.22720300 |
| C | 5.63411500   | -2.71472700 | -2.50225200 |
| C | 6.94355800   | -1.93226500 | -0.11669900 |
| H | 4.94686300   | -1.42981400 | 0.57721900  |
| C | 7.03313100   | -2.76675300 | -2.40446900 |
| H | 5.15179500   | -2.99886800 | -3.43486800 |
| C | 7.68733200   | -1.50497700 | 1.09208500  |
| C | 7.71183100   | -2.40350400 | -1.22950200 |
| H | 7.60516100   | -3.06405800 | -3.28304700 |
| C | 8.95033000   | -0.79659300 | 0.77826400  |
| C | 9.18724700   | -2.42119700 | -1.09267700 |
| C | 9.40333600   | 0.33499900  | 1.47671600  |
| C | 9.71692600   | -1.25957700 | -0.33870600 |
| C | 10.59390700  | 0.99320700  | 1.13448700  |
| H | 8.79872900   | 0.74104300  | 2.28737300  |
| C | 10.88861000  | -0.58039300 | -0.70048900 |
| C | 11.34383800  | 0.52991300  | 0.03810800  |
| H | 10.90481700  | 1.86777000  | 1.70137500  |
| H | 11.45218900  | -0.86868600 | -1.58620100 |
| O | 12.50465100  | 1.10094300  | -0.41338000 |
| O | -12.31793700 | 1.38352200  | 0.55734700  |
| C | -8.81997100  | -1.72594100 | 3.11840200  |
| S | -10.51108600 | -1.73192600 | 3.73218300  |
| C | -8.90559000  | -3.03489200 | 5.41849900  |
| C | -10.18630000 | -2.70498300 | 5.16339200  |
| H | -8.56804600  | -3.61310900 | 6.27631700  |
| H | -11.03716300 | -2.97750500 | 5.78463400  |
| C | -8.19635300  | -3.28832000 | -1.59247900 |
| S | -9.70992000  | -3.79543800 | -2.42380400 |
| C | -7.85226900  | -5.69893400 | -2.63631600 |
| C | -9.13746800  | -5.39228400 | -2.89689500 |
| H | -7.37014800  | -6.64047600 | -2.89169400 |
| H | -9.84754000  | -6.04988300 | -3.39444800 |
| C | 7.30049700   | -1.83005400 | 2.37008800  |
| S | 5.83286300   | -2.79081100 | 2.77053100  |

|   |              |             |             |
|---|--------------|-------------|-------------|
| C | 7.36007400   | -2.47865800 | 4.93602500  |
| C | 6.25515900   | -3.08057200 | 4.45545800  |
| H | 7.71946600   | -2.55794400 | 5.96007900  |
| H | 5.58946300   | -3.71815400 | 5.03383500  |
| C | 9.97318800   | -3.46354100 | -1.52194500 |
| S | 11.75027500  | -3.56499200 | -1.25923600 |
| C | 10.81150600  | -5.88743500 | -2.17892700 |
| C | 11.90760300  | -5.25980400 | -1.71128200 |
| H | 10.77791000  | -6.92350100 | -2.50994900 |
| H | 12.89115000  | -5.71399300 | -1.60851200 |
| C | 12.98907600  | 2.26261800  | 0.27772100  |
| H | 13.17441600  | 2.01699700  | 1.33957600  |
| H | 12.22634000  | 3.06239300  | 0.24647600  |
| C | 14.27576800  | 2.71750500  | -0.40383800 |
| H | 15.00634700  | 1.89363000  | -0.37682800 |
| H | 14.06391600  | 2.92786800  | -1.46409500 |
| C | 14.86329500  | 3.96629400  | 0.27398800  |
| H | 15.06189200  | 3.75003500  | 1.33825000  |
| H | 14.11829400  | 4.78086800  | 0.25563300  |
| C | 16.15964700  | 4.45184100  | -0.39427200 |
| H | 16.90668100  | 3.63945100  | -0.37483900 |
| H | 15.96234400  | 4.66710700  | -1.45877900 |
| C | 16.74758700  | 5.70217100  | 0.27843600  |
| H | 16.94416700  | 5.48561000  | 1.34317000  |
| H | 15.99773100  | 6.51250600  | 0.26060800  |
| C | 18.04271000  | 6.19390400  | -0.38753800 |
| H | 18.79346600  | 5.38466100  | -0.36860500 |
| H | 17.84649700  | 6.40965400  | -1.45244400 |
| C | -13.22005400 | 1.90345900  | -0.43158700 |
| H | -13.76516200 | 1.07246900  | -0.91586700 |
| H | -12.65026000 | 2.43399200  | -1.21657600 |
| C | -14.18914700 | 2.85229300  | 0.26652800  |
| H | -14.72251400 | 2.30136900  | 1.05725900  |
| H | -13.61330100 | 3.65078200  | 0.76058900  |
| C | -15.19643100 | 3.46392200  | -0.72123300 |
| H | -15.76404200 | 2.65758300  | -1.21769300 |

|   |              |             |             |
|---|--------------|-------------|-------------|
| H | -14.65266800 | 3.99909000  | -1.51925200 |
| C | -16.17890300 | 4.43148800  | -0.04215000 |
| H | -16.72397300 | 3.89745300  | 0.75542900  |
| H | -15.61111100 | 5.23676700  | 0.45541800  |
| C | -17.18732900 | 5.05011400  | -1.02306000 |
| H | -17.75602800 | 4.24421100  | -1.51934400 |
| H | -16.64060600 | 5.58091600  | -1.82218400 |
| C | -18.16740300 | 6.02157800  | -0.34621700 |
| H | -18.71477400 | 5.49085400  | 0.45227900  |
| H | -17.59824300 | 6.82660500  | 0.15082300  |
| S | 8.27997900   | -1.45914500 | 3.83336000  |
| S | 9.32245900   | -4.95372600 | -2.29313600 |
| S | -7.67596600  | -2.46379500 | 4.29521300  |
| S | -6.86398000  | -4.47426200 | -1.84494200 |
| C | -19.17480900 | 6.64229000  | -1.32709700 |
| H | -19.74423600 | 5.83733700  | -1.82403400 |
| H | -18.62782300 | 7.17347900  | -2.12590800 |
| C | -20.15360100 | 7.61377100  | -0.64882900 |
| H | -20.70690100 | 7.08867700  | 0.14744400  |
| H | -19.58502900 | 8.42063800  | -0.15461300 |
| C | 18.62730600  | 7.44578700  | 0.28555600  |
| H | 18.82332200  | 7.22986300  | 1.35049300  |
| H | 17.87648500  | 8.25532100  | 0.26676400  |
| C | 19.92202200  | 7.93817800  | -0.38027800 |
| H | 19.72602600  | 8.15758400  | -1.44424400 |
| H | 20.67861100  | 7.13622500  | -0.36097600 |
| C | -21.16332400 | 8.23316100  | -1.64191900 |
| H | -21.74793900 | 7.43056000  | -2.12127000 |
| H | -20.59275900 | 8.73722400  | -2.44372400 |
| C | 20.50234200  | 9.19712400  | 0.30348700  |
| H | 20.72042100  | 8.97433100  | 1.36107600  |
| H | 19.72467900  | 9.98304800  | 0.29487000  |
| C | 21.74650500  | 9.70470600  | -0.37923100 |
| H | 21.62743200  | 10.00189800 | -1.42749000 |
| C | 22.95782400  | 9.78435000  | 0.18994200  |
| H | 23.11193700  | 9.49075200  | 1.23170700  |

|   |              |             |             |
|---|--------------|-------------|-------------|
| H | 23.82912700  | 10.14614400 | -0.35884300 |
| C | -22.09319100 | 9.21886600  | -0.98208400 |
| H | -21.61394200 | 10.08621700 | -0.51373300 |
| C | -23.42562300 | 9.08883400  | -0.90928500 |
| H | -23.93432700 | 8.23302000  | -1.36098000 |
| H | -24.04947300 | 9.82816100  | -0.40388600 |

**(5,5) tube**

|   |             |             |             |
|---|-------------|-------------|-------------|
| C | -3.47782000 | 11.10596500 | 0.69110000  |
| C | -3.47782000 | 11.10596500 | -0.69110000 |
| C | -3.19013500 | 9.90428800  | -1.41803600 |
| C | -3.36935500 | 8.67188000  | -0.72071600 |
| C | -3.36935500 | 8.67188000  | 0.72071600  |
| C | -3.19013500 | 9.90428800  | 1.41803600  |
| C | -3.14059500 | 7.42461800  | -1.40024300 |
| C | -2.30221900 | 7.42467800  | -2.55347100 |
| C | -1.72649500 | 8.67204500  | -2.98059700 |
| C | -2.33452500 | 9.90439700  | -2.59476600 |
| C | -0.35556600 | 8.67209200  | -3.42594000 |
| C | 0.36302800  | 9.90451500  | -3.47082100 |
| C | -0.41718700 | 11.10627900 | -3.51929300 |
| C | -1.73171400 | 11.10621200 | -3.09229200 |
| C | -3.14059500 | 7.42461800  | 1.40024300  |
| C | -3.37912500 | 6.18576200  | 0.71987800  |
| C | -3.37912500 | 6.18576200  | -0.71987800 |
| C | -3.15777100 | 4.95315400  | -1.40466800 |
| C | -2.31168100 | 4.95318800  | -2.56842600 |
| C | -1.72863100 | 6.18583300  | -2.99022600 |
| C | -0.35936000 | 6.18586600  | -3.43509800 |
| C | 0.36137300  | 7.42475900  | -3.41871200 |
| C | -3.15777100 | 4.95315400  | 1.40466800  |
| C | -3.37605900 | 3.71254900  | 0.71592100  |
| C | -3.37605900 | 3.71254900  | -0.71592100 |
| C | -3.15878900 | 2.47329300  | -1.40486600 |
| C | -2.31218500 | 2.47331200  | -2.56931900 |
| C | -1.72392700 | 3.71257200  | -2.98855200 |

|   |             |             |             |
|---|-------------|-------------|-------------|
| C | -0.36217900 | 3.71258600  | -3.43100300 |
| C | 0.36027400  | 4.95322200  | -3.43641400 |
| C | -3.15878900 | 2.47329300  | 1.40486600  |
| C | -3.15193000 | 0.00000500  | -1.40448800 |
| C | -2.30970700 | -0.00000300 | -2.56290000 |
| C | -1.72890900 | 1.23972700  | -2.99203200 |
| C | -0.36018500 | 1.23972000  | -3.43675300 |
| C | 0.36016900  | 2.47332700  | -3.43742500 |
| C | -3.15193000 | 0.00000500  | 1.40448800  |
| C | -3.38095700 | -1.23972200 | 0.71957900  |
| C | -3.38095700 | -1.23972200 | -0.71957900 |
| C | -3.15877400 | -2.47330300 | -1.40487300 |
| C | -2.31218000 | -2.47331700 | -2.56929700 |
| C | -1.72889200 | -1.23972200 | -2.99202300 |
| C | -0.36018600 | -1.23973100 | -3.43674300 |
| C | 0.36194000  | 0.00000500  | -3.43083200 |
| C | -3.15877400 | -2.47330300 | 1.40487300  |
| C | -3.37606600 | -3.71255100 | 0.71592500  |
| C | -3.37606600 | -3.71255100 | -0.71592500 |
| C | -3.15776100 | -4.95315000 | -1.40467000 |
| C | -2.31167700 | -4.95319900 | -2.56842000 |
| C | -1.72391600 | -3.71257300 | -2.98855000 |
| C | -0.36217800 | -3.71258000 | -3.43100300 |
| C | 0.36016800  | -2.47332700 | -3.43745400 |
| C | -3.15776100 | -4.95315000 | 1.40467000  |
| C | -3.37911500 | -6.18577400 | 0.71987300  |
| C | -3.37911500 | -6.18577400 | -0.71987300 |
| C | -3.14058900 | -7.42461400 | -1.40024900 |
| C | -2.30222400 | -7.42467400 | -2.55348000 |
| C | -1.72865000 | -6.18584300 | -2.99024300 |
| C | -0.35935900 | -6.18587500 | -3.43511500 |
| C | 0.36027900  | -4.95323100 | -3.43641100 |
| C | -3.14058900 | -7.42461400 | 1.40024900  |
| C | -3.36932800 | -8.67188100 | 0.72070100  |
| C | -3.36932800 | -8.67188100 | -0.72070100 |
| C | -3.19018100 | -9.90430400 | -1.41803900 |



|   |             |              |             |
|---|-------------|--------------|-------------|
| C | -2.33454200 | -9.90441000  | -2.59480700 |
| C | -1.72648100 | -8.67205300  | -2.98059200 |
| C | -0.35557300 | -8.67210100  | -3.42592000 |
| C | 0.36137200  | -7.42475400  | -3.41871200 |
| C | -3.19018100 | -9.90430400  | 1.41803900  |
| C | -3.47788100 | -11.10592900 | 0.69112000  |
| C | -3.47788100 | -11.10592900 | -0.69112000 |
| C | 0.36301600  | -9.90453000  | -3.47085600 |
| C | -0.41718100 | -11.10625600 | -3.51932300 |
| C | -1.73174200 | -11.10618800 | -3.09231200 |
| C | 1.71742300  | -7.42472200  | -2.97813100 |
| C | 2.30181700  | -8.67201600  | -2.56274200 |
| C | 1.74681200  | -9.90448900  | -3.02133200 |
| C | 1.72869500  | -4.95321200  | -2.99178800 |
| C | 2.31023200  | -6.18584400  | -2.56788900 |
| C | 3.15685100  | -6.18581200  | -1.40342100 |
| C | 3.36422200  | -7.42462900  | -0.71292900 |
| C | 3.14945100  | -8.67193900  | -1.39696200 |
| C | 3.41478000  | -9.90431500  | -0.72750500 |
| C | 3.21969800  | -11.10601500 | -1.48439500 |
| C | 2.40670500  | -11.10614000 | -2.60221300 |
| C | 3.36422200  | -7.42462900  | 0.71292900  |
| C | 3.14945100  | -8.67193900  | 1.39696200  |
| C | 3.41478000  | -9.90431500  | 0.72750500  |
| C | 3.38067300  | -4.95317800  | -0.71943600 |
| C | 3.38067300  | -4.95317800  | 0.71943600  |
| C | 3.15685100  | -6.18581200  | 1.40342100  |
| C | 2.31023200  | -6.18584400  | 2.56788900  |
| C | 1.71742300  | -7.42472200  | 2.97813100  |
| C | 2.30181700  | -8.67201600  | 2.56274200  |
| C | 1.74681200  | -9.90448900  | 3.02133200  |
| C | 2.40670500  | -11.10614000 | 2.60221300  |
| C | 3.21969800  | -11.10601500 | 1.48439500  |
| C | 0.36137200  | -7.42475400  | 3.41871200  |
| C | -0.35557300 | -8.67210100  | 3.42592000  |
| C | 0.36301600  | -9.90453000  | 3.47085600  |

|   |             |              |             |
|---|-------------|--------------|-------------|
| C | 1.72869500  | -4.95321200  | 2.99178800  |
| C | 0.36027900  | -4.95323100  | 3.43641100  |
| C | -0.35935900 | -6.18587500  | 3.43511500  |
| C | -1.72865000 | -6.18584300  | 2.99024300  |
| C | -2.30222400 | -7.42467400  | 2.55348000  |
| C | -1.72648100 | -8.67205300  | 2.98059200  |
| C | -2.33454200 | -9.90441000  | 2.59480700  |
| C | -1.73174200 | -11.10618800 | 3.09231200  |
| C | -0.41718100 | -11.10625600 | 3.51932300  |
| C | -2.31167700 | -4.95319900  | 2.56842000  |
| C | 3.15203000  | -3.71256300  | 1.40481600  |
| C | 2.31008200  | -3.71257600  | 2.56288000  |
| C | 3.15203000  | -3.71256300  | -1.40481600 |
| C | 2.31008200  | -3.71257600  | -2.56288000 |
| C | -0.36217800 | -3.71258000  | 3.43100300  |
| C | -1.72391600 | -3.71257300  | 2.98855000  |
| C | 3.38163900  | -2.47331300  | 0.71987700  |
| C | 3.38163900  | -2.47331300  | -0.71987700 |
| C | 1.72942200  | -2.47332100  | -2.99255300 |
| C | 1.72942200  | -2.47332100  | 2.99255300  |
| C | 0.36016800  | -2.47332700  | 3.43745400  |
| C | -2.31218000 | -2.47331700  | 2.56929700  |
| C | 3.15816100  | -1.23972400  | 1.40471900  |
| C | 2.31189600  | -1.23973200  | 2.56872300  |
| C | 3.15816100  | -1.23972400  | -1.40471900 |
| C | 2.31189600  | -1.23973200  | -2.56872300 |
| C | -0.36018600 | -1.23973100  | 3.43674300  |
| C | -1.72889200 | -1.23972200  | 2.99202300  |
| C | 3.37587500  | 0.00000400   | 0.71615800  |
| C | 3.37587500  | 0.00000400   | -0.71615800 |
| C | 1.72411800  | 0.00000300   | -2.98823700 |
| C | 1.72411800  | 0.00000300   | 2.98823700  |
| C | 0.36194000  | 0.00000500   | 3.43083200  |
| C | -2.30970700 | -0.00000300  | 2.56290000  |
| C | 3.15817700  | 1.23971800   | 1.40471800  |
| C | 2.31189800  | 1.23972500   | 2.56873400  |

|   |             |            |             |
|---|-------------|------------|-------------|
| C | 3.15817700  | 1.23971800 | -1.40471800 |
| C | 2.31189800  | 1.23972500 | -2.56873400 |
| C | -0.36018500 | 1.23972000 | 3.43675300  |
| C | -1.72890900 | 1.23972700 | 2.99203200  |
| C | 3.38162900  | 2.47330600 | 0.71986900  |
| C | 3.38162900  | 2.47330600 | -0.71986900 |
| C | 1.72940700  | 2.47331300 | -2.99254000 |
| C | 1.72940700  | 2.47331300 | 2.99254000  |
| C | 0.36016900  | 2.47332700 | 3.43742500  |
| C | -2.31218500 | 2.47331200 | 2.56931900  |
| C | 3.15203500  | 3.71257100 | 1.40481500  |
| C | 2.31008200  | 3.71258600 | 2.56287400  |
| C | 3.15203500  | 3.71257100 | -1.40481500 |
| C | 2.31008200  | 3.71258600 | -2.56287400 |
| C | -0.36217900 | 3.71258600 | 3.43100300  |
| C | -1.72392700 | 3.71257200 | 2.98855200  |
| C | 3.38069100  | 4.95317400 | 0.71944500  |
| C | 3.38069100  | 4.95317400 | -0.71944500 |
| C | 1.72870500  | 4.95320200 | -2.99178900 |
| C | 1.72870500  | 4.95320200 | 2.99178900  |
| C | 0.36027400  | 4.95322200 | 3.43641400  |
| C | -2.31168100 | 4.95318800 | 2.56842600  |
| C | 3.15683600  | 6.18580500 | 1.40342000  |
| C | 2.31022900  | 6.18583800 | 2.56786700  |
| C | 3.15683600  | 6.18580500 | -1.40342000 |
| C | 2.31022900  | 6.18583800 | -2.56786700 |
| C | -0.35936000 | 6.18586600 | 3.43509800  |
| C | -1.72863100 | 6.18583300 | 2.99022600  |
| C | 3.36422300  | 7.42464600 | 0.71292900  |
| C | 3.36422300  | 7.42464600 | -0.71292900 |
| C | 1.71742700  | 7.42472900 | -2.97813200 |
| C | 1.71742700  | 7.42472900 | 2.97813200  |
| C | 0.36137300  | 7.42475900 | 3.41871200  |
| C | -2.30221900 | 7.42467800 | 2.55347100  |
| C | 3.14946900  | 8.67193600 | 1.39696500  |
| C | 2.30182400  | 8.67201000 | 2.56276600  |

|   |             |              |             |
|---|-------------|--------------|-------------|
| C | 3.14946900  | 8.67193600   | -1.39696500 |
| C | 2.30182400  | 8.67201000   | -2.56276600 |
| C | -0.35556600 | 8.67209200   | 3.42594000  |
| C | -1.72649500 | 8.67204500   | 2.98059700  |
| C | 3.41473000  | 9.90431300   | 0.72748100  |
| C | 3.41473000  | 9.90431300   | -0.72748100 |
| C | 1.74677500  | 9.90447700   | -3.02131500 |
| C | 1.74677500  | 9.90447700   | 3.02131500  |
| C | 0.36302800  | 9.90451500   | 3.47082100  |
| C | -2.33452500 | 9.90439700   | 2.59476600  |
| C | 3.21965300  | 11.10604500  | 1.48440100  |
| C | 2.40668000  | 11.10616600  | 2.60219200  |
| C | 3.21965300  | 11.10604500  | -1.48440100 |
| C | 2.40668000  | 11.10616600  | -2.60219200 |
| C | -0.41718700 | 11.10627900  | 3.51929300  |
| C | -1.73171400 | 11.10621200  | 3.09229200  |
| C | -3.38098700 | 1.23972100   | -0.71960900 |
| C | -3.38098700 | 1.23972100   | 0.71960900  |
| H | 2.14328000  | -12.05809000 | 3.06206800  |
| H | 3.57602200  | -12.05787800 | 1.09185400  |
| H | -2.25079600 | -12.05802700 | 2.98417600  |
| H | 0.06622000  | -12.05815500 | 3.73681100  |
| H | -3.53534300 | -12.05781100 | -1.21810400 |
| H | -3.53534300 | -12.05781100 | 1.21810400  |
| H | 3.57602200  | -12.05787800 | -1.09185400 |
| H | 2.14328000  | -12.05809000 | -3.06206800 |
| H | 0.06622000  | -12.05815500 | -3.73681100 |
| H | -2.25079600 | -12.05802700 | -2.98417600 |
| H | 3.57606600  | 12.05787900  | 1.09187300  |
| H | 2.14327400  | 12.05808400  | 3.06213000  |
| H | 0.06624700  | 12.05814000  | 3.73688000  |
| H | -2.25084900 | 12.05801500  | 2.98422400  |
| H | -3.53534700 | 12.05780700  | 1.21815000  |
| H | -3.53534700 | 12.05780700  | -1.21815000 |
| H | -2.25084900 | 12.05801500  | -2.98422400 |
| H | 0.06624700  | 12.05814000  | -3.73688000 |

|   |            |             |             |
|---|------------|-------------|-------------|
| H | 2.14327400 | 12.05808400 | -3.06213000 |
| H | 3.57606600 | 12.05787900 | -1.09187300 |

**(6,6) tube**

|   |              |             |             |
|---|--------------|-------------|-------------|
| H | -12.06130100 | -0.23560700 | -4.41172000 |
| H | -12.06127800 | -2.53390500 | -3.61918000 |
| H | -12.06128200 | -3.93890200 | -2.00191400 |
| H | -12.06123800 | -4.40161100 | 0.38483000  |
| H | -12.06125300 | -3.70312600 | 2.41006900  |
| H | -12.06126900 | -1.86785400 | 4.00433200  |
| H | -12.06127000 | 1.86785300  | -4.00433200 |
| H | -12.06125300 | 3.70312500  | -2.41006900 |
| H | -12.06123800 | 4.40161200  | -0.38483000 |
| H | -12.06128200 | 3.93890300  | 2.00191300  |
| H | -12.06127900 | 2.53390400  | 3.61917900  |
| H | -12.06130100 | 0.23560700  | 4.41171900  |
| C | -11.10850100 | -0.71040200 | -4.18099100 |
| C | -11.10848400 | -2.01780000 | -3.73016800 |
| C | -11.10851000 | -3.97634100 | -1.47529000 |
| C | -11.10845900 | -4.23958600 | -0.11764500 |
| C | -11.10845100 | -3.26584800 | 2.70579700  |
| C | -11.10846400 | -2.22177100 | 3.61264100  |
| C | -11.10846500 | 2.22177100  | -3.61264100 |
| C | -11.10845100 | 3.26584700  | -2.70579700 |
| C | -11.10845900 | 4.23958700  | 0.11764500  |
| C | -11.10851000 | 3.97634200  | 1.47529000  |
| C | -11.10848500 | 2.01780000  | 3.73016800  |
| C | -11.10850100 | 0.71040200  | 4.18099000  |
| C | -9.90873400  | 0.06889200  | -4.17331000 |
| C | -9.90872400  | -2.62672800 | -3.24380600 |
| C | -9.90869700  | -3.58001300 | -2.14636000 |
| C | -9.90868200  | -4.12281100 | 0.65288700  |
| C | -9.90870100  | -3.64888900 | 2.02706900  |
| C | -9.90869200  | -1.49596400 | 3.89668100  |
| C | -9.90869200  | 1.49596300  | -3.89668000 |
| C | -9.90870100  | 3.64888900  | -2.02706800 |

|   |             |             |             |
|---|-------------|-------------|-------------|
| C | -9.90868200 | 4.12281200  | -0.65288700 |
| C | -9.90869700 | 3.58001300  | 2.14636000  |
| C | -9.90872400 | 2.62672800  | 3.24380600  |
| C | -9.90873400 | -0.06889200 | 4.17331000  |
| C | -8.67468400 | -0.64288600 | -4.07047000 |
| C | -8.67468800 | -2.00286700 | -3.60156700 |
| C | -8.67467000 | -3.84681100 | -1.47853900 |
| C | -8.67465100 | -4.12074900 | -0.06625500 |
| C | -8.67464700 | -3.20391900 | 2.59197500  |
| C | -8.67464900 | -2.11773500 | 3.53522400  |
| C | -8.67464900 | 2.11773500  | -3.53522400 |
| C | -8.67464700 | 3.20391900  | -2.59197500 |
| C | -8.67465100 | 4.12074900  | 0.06625500  |
| C | -8.67467000 | 3.84681100  | 1.47853900  |
| C | -8.67468800 | 2.00286600  | 3.60156700  |
| C | -8.67468400 | 0.64288600  | 4.07047000  |
| C | -7.42765500 | 0.07186200  | -4.11230700 |
| C | -7.42764100 | -2.59136500 | -3.19386900 |
| C | -7.42763600 | -3.52555500 | -2.11848400 |
| C | -7.42760700 | -4.06190700 | 0.64726900  |
| C | -7.42761000 | -3.59751500 | 1.99390900  |
| C | -7.42763300 | -1.47033500 | 3.84110500  |
| C | -7.42763300 | 1.47033500  | -3.84110500 |
| C | -7.42761000 | 3.59751500  | -1.99390900 |
| C | -7.42760700 | 4.06190700  | -0.64726900 |
| C | -7.42763600 | 3.52555500  | 2.11848400  |
| C | -7.42764100 | 2.59136500  | 3.19386900  |
| C | -7.42765400 | -0.07186200 | 4.11230700  |
| C | -6.18874300 | -0.64592200 | -4.07590500 |
| C | -6.18874200 | -2.00378000 | -3.60776500 |
| C | -6.18872600 | -3.85303800 | -1.47866700 |
| C | -6.18871500 | -4.12655100 | -0.06857100 |
| C | -6.18871600 | -3.20699100 | 2.59727000  |
| C | -6.18873100 | -2.12261500 | 3.53916700  |
| C | -6.18873200 | 2.12261500  | -3.53916700 |
| C | -6.18871600 | 3.20699100  | -2.59727000 |

|   |             |             |             |
|---|-------------|-------------|-------------|
| C | -6.18871500 | 4.12655100  | 0.06857100  |
| C | -6.18872600 | 3.85303800  | 1.47866700  |
| C | -6.18874200 | 2.00378000  | 3.60776500  |
| C | -6.18874300 | 0.64592200  | 4.07590500  |
| C | -4.95449700 | 0.06957400  | -4.12940100 |
| C | -4.95448100 | -2.60001000 | -3.20873100 |
| C | -4.95448300 | -3.54144800 | -2.12503000 |
| C | -4.95446600 | -4.07899800 | 0.64731600  |
| C | -4.95446800 | -3.61103800 | 2.00438700  |
| C | -4.95448600 | -1.47887400 | 3.85607200  |
| C | -4.95448600 | 1.47887400  | -3.85607200 |
| C | -4.95446800 | 3.61103800  | -2.00438700 |
| C | -4.95446600 | 4.07899800  | -0.64731600 |
| C | -4.95448300 | 3.54144800  | 2.12503000  |
| C | -4.95448100 | 2.60001000  | 3.20873100  |
| C | -4.95449700 | -0.06957400 | 4.12940200  |
| C | -3.71388800 | -0.64917400 | -4.07620000 |
| C | -3.71388800 | -2.00132600 | -3.61001600 |
| C | -3.71387400 | -3.85480200 | -1.47596500 |
| C | -3.71387100 | -4.12714500 | -0.07180600 |
| C | -3.71387000 | -3.20554300 | 2.60018900  |
| C | -3.71388200 | -2.12573200 | 3.53812400  |
| C | -3.71388200 | 2.12573200  | -3.53812400 |
| C | -3.71387000 | 3.20554300  | -2.60018900 |
| C | -3.71387100 | 4.12714500  | 0.07180600  |
| C | -3.71387400 | 3.85480200  | 1.47596500  |
| C | -3.71388800 | 2.00132600  | 3.61001600  |
| C | -3.71388800 | 0.64917400  | 4.07620000  |
| C | -2.47469300 | 0.06938000  | -4.13158200 |
| C | -2.47468900 | -2.60116100 | -3.21059300 |
| C | -2.47468700 | -3.54338700 | -2.12595100 |
| C | -2.47467900 | -4.08113400 | 0.64739500  |
| C | -2.47468000 | -3.61280100 | 2.00563200  |
| C | -2.47468500 | -1.47987900 | 3.85799000  |
| C | -2.47468500 | 1.47987900  | -3.85799000 |
| C | -2.47468000 | 3.61280100  | -2.00563200 |

|   |             |             |             |
|---|-------------|-------------|-------------|
| C | -2.47467900 | 4.08113400  | -0.64739500 |
| C | -2.47468700 | 3.54338700  | 2.12595100  |
| C | -2.47468900 | 2.60116000  | 3.21059300  |
| C | -2.47469300 | -0.06938000 | 4.13158200  |
| C | -1.23972800 | -0.64746200 | -4.08031400 |
| C | -1.23972900 | -2.00519100 | -3.61221900 |
| C | -1.23972600 | -3.85750000 | -1.47951100 |
| C | -1.23972400 | -4.13098600 | -0.06955800 |
| C | -1.23972100 | -3.20996400 | 2.60077100  |
| C | -1.23972600 | -2.12570000 | 3.54258400  |
| C | -1.23972600 | 2.12570000  | -3.54258400 |
| C | -1.23972100 | 3.20996400  | -2.60077100 |
| C | -1.23972400 | 4.13098600  | 0.06955800  |
| C | -1.23972600 | 3.85750000  | 1.47951100  |
| C | -1.23972900 | 2.00519100  | 3.61221900  |
| C | -1.23972800 | 0.64746200  | 4.08031400  |
| C | 0.00000000  | 0.07149500  | -4.12680600 |
| C | 0.00000000  | -2.59987800 | -3.20555300 |
| C | 0.00000000  | -3.53819000 | -2.12540300 |
| C | 0.00000000  | -4.07614700 | 0.64881200  |
| C | 0.00000000  | -3.60974900 | 2.00142300  |
| C | 0.00000000  | -1.47614500 | 3.85435800  |
| C | 0.00000000  | 1.47614500  | -3.85435800 |
| C | 0.00000000  | 3.60974900  | -2.00142300 |
| C | 0.00000000  | 4.07614700  | -0.64881300 |
| C | 0.00000000  | 3.53819000  | 2.12540300  |
| C | 0.00000000  | 2.59987800  | 3.20555300  |
| C | 0.00000000  | -0.07149500 | 4.12680600  |
| C | 1.23972800  | -0.64746200 | -4.08031300 |
| C | 1.23972900  | -2.00519100 | -3.61221900 |
| C | 1.23972600  | -3.85750000 | -1.47951100 |
| C | 1.23972400  | -4.13098600 | -0.06955800 |
| C | 1.23972100  | -3.20996400 | 2.60077100  |
| C | 1.23972600  | -2.12570000 | 3.54258400  |
| C | 1.23972600  | 2.12570000  | -3.54258400 |
| C | 1.23972100  | 3.20996400  | -2.60077100 |



|   |            |             |             |
|---|------------|-------------|-------------|
| C | 1.23972400 | 4.13098600  | 0.06955800  |
| C | 1.23972600 | 3.85750000  | 1.47951100  |
| C | 1.23972900 | 2.00519100  | 3.61221800  |
| C | 1.23972800 | 0.64746200  | 4.08031300  |
| C | 2.47469200 | 0.06938000  | -4.13158200 |
| C | 2.47468900 | -2.60116000 | -3.21059300 |
| C | 2.47468600 | -3.54338700 | -2.12595100 |
| C | 2.47467900 | -4.08113400 | 0.64739500  |
| C | 2.47468000 | -3.61280100 | 2.00563200  |
| C | 2.47468500 | -1.47987900 | 3.85799100  |
| C | 2.47468500 | 1.47987900  | -3.85799100 |
| C | 2.47468000 | 3.61280100  | -2.00563200 |
| C | 2.47467900 | 4.08113400  | -0.64739500 |
| C | 2.47468600 | 3.54338700  | 2.12595100  |
| C | 2.47468900 | 2.60116000  | 3.21059300  |
| C | 2.47469200 | -0.06938000 | 4.13158200  |
| C | 3.71388800 | -0.64917400 | -4.07620000 |
| C | 3.71388800 | -2.00132600 | -3.61001600 |
| C | 3.71387400 | -3.85480200 | -1.47596500 |
| C | 3.71387000 | -4.12714400 | -0.07180600 |
| C | 3.71387000 | -3.20554200 | 2.60018900  |
| C | 3.71388200 | -2.12573200 | 3.53812400  |
| C | 3.71388200 | 2.12573200  | -3.53812400 |
| C | 3.71387000 | 3.20554200  | -2.60018900 |
| C | 3.71387100 | 4.12714400  | 0.07180600  |
| C | 3.71387400 | 3.85480200  | 1.47596500  |
| C | 3.71388800 | 2.00132600  | 3.61001600  |
| C | 3.71388800 | 0.64917400  | 4.07620000  |
| C | 4.95449700 | 0.06957400  | -4.12940100 |
| C | 4.95448100 | -2.60001000 | -3.20873100 |
| C | 4.95448300 | -3.54144800 | -2.12503000 |
| C | 4.95446600 | -4.07899800 | 0.64731600  |
| C | 4.95446800 | -3.61103800 | 2.00438700  |
| C | 4.95448600 | -1.47887400 | 3.85607200  |
| C | 4.95448600 | 1.47887400  | -3.85607200 |
| C | 4.95446800 | 3.61103800  | -2.00438700 |

|   |            |             |             |
|---|------------|-------------|-------------|
| C | 4.95446600 | 4.07899800  | -0.64731600 |
| C | 4.95448300 | 3.54144800  | 2.12503000  |
| C | 4.95448100 | 2.60001000  | 3.20873100  |
| C | 4.95449700 | -0.06957400 | 4.12940100  |
| C | 6.18874300 | -0.64592200 | -4.07590600 |
| C | 6.18874200 | -2.00378000 | -3.60776500 |
| C | 6.18872500 | -3.85303800 | -1.47866700 |
| C | 6.18871500 | -4.12655100 | -0.06857100 |
| C | 6.18871600 | -3.20699100 | 2.59727000  |
| C | 6.18873100 | -2.12261500 | 3.53916800  |
| C | 6.18873100 | 2.12261500  | -3.53916800 |
| C | 6.18871600 | 3.20699100  | -2.59727100 |
| C | 6.18871500 | 4.12655100  | 0.06857100  |
| C | 6.18872500 | 3.85303800  | 1.47866700  |
| C | 6.18874200 | 2.00378000  | 3.60776500  |
| C | 6.18874300 | 0.64592200  | 4.07590600  |
| C | 7.42765400 | 0.07186200  | -4.11230800 |
| C | 7.42764100 | -2.59136600 | -3.19386900 |
| C | 7.42763600 | -3.52555500 | -2.11848400 |
| C | 7.42760800 | -4.06190800 | 0.64726900  |
| C | 7.42760900 | -3.59751600 | 1.99391000  |
| C | 7.42763300 | -1.47033500 | 3.84110600  |
| C | 7.42763300 | 1.47033500  | -3.84110600 |
| C | 7.42760900 | 3.59751600  | -1.99391000 |
| C | 7.42760800 | 4.06190700  | -0.64726900 |
| C | 7.42763600 | 3.52555500  | 2.11848500  |
| C | 7.42764100 | 2.59136600  | 3.19387000  |
| C | 7.42765400 | -0.07186200 | 4.11230800  |
| C | 8.67468400 | -0.64288600 | -4.07047000 |
| C | 8.67468800 | -2.00286700 | -3.60156800 |
| C | 8.67467000 | -3.84681100 | -1.47853900 |
| C | 8.67465100 | -4.12074900 | -0.06625500 |
| C | 8.67464700 | -3.20391900 | 2.59197500  |
| C | 8.67464900 | -2.11773500 | 3.53522500  |
| C | 8.67464900 | 2.11773500  | -3.53522500 |
| C | 8.67464700 | 3.20391900  | -2.59197500 |

|   |             |             |             |
|---|-------------|-------------|-------------|
| C | 8.67465100  | 4.12074900  | 0.06625500  |
| C | 8.67467000  | 3.84681100  | 1.47853900  |
| C | 8.67468800  | 2.00286700  | 3.60156800  |
| C | 8.67468400  | 0.64288600  | 4.07047100  |
| C | 9.90873400  | 0.06889200  | -4.17331200 |
| C | 9.90872500  | -2.62672900 | -3.24380700 |
| C | 9.90869800  | -3.58001400 | -2.14636000 |
| C | 9.90868200  | -4.12281200 | 0.65288800  |
| C | 9.90870200  | -3.64889000 | 2.02706900  |
| C | 9.90869200  | -1.49596400 | 3.89668200  |
| C | 9.90869200  | 1.49596400  | -3.89668200 |
| C | 9.90870200  | 3.64889000  | -2.02706900 |
| C | 9.90868200  | 4.12281200  | -0.65288800 |
| C | 9.90869800  | 3.58001400  | 2.14636000  |
| C | 9.90872500  | 2.62672800  | 3.24380700  |
| C | 9.90873400  | -0.06889200 | 4.17331100  |
| C | 11.10850200 | -0.71040200 | -4.18099200 |
| C | 11.10848500 | -2.01780000 | -3.73016900 |
| C | 11.10851000 | -3.97634200 | -1.47529000 |
| C | 11.10846000 | -4.23958700 | -0.11764500 |
| C | 11.10845200 | -3.26584800 | 2.70579800  |
| C | 11.10846500 | -2.22177200 | 3.61264300  |
| C | 11.10846500 | 2.22177100  | -3.61264200 |
| C | 11.10845200 | 3.26584800  | -2.70579800 |
| C | 11.10846000 | 4.23958800  | 0.11764500  |
| C | 11.10851000 | 3.97634200  | 1.47529000  |
| C | 11.10848500 | 2.01780000  | 3.73016900  |
| C | 11.10850200 | 0.71040200  | 4.18099200  |
| H | 12.06130200 | -0.23560700 | -4.41172100 |
| H | 12.06127900 | -2.53390500 | -3.61918100 |
| H | 12.06128200 | -3.93890300 | -2.00191300 |
| H | 12.06123900 | -4.40161300 | 0.38483100  |
| H | 12.06125300 | -3.70312700 | 2.41007100  |
| H | 12.06127000 | -1.86785500 | 4.00433500  |
| H | 12.06127000 | 1.86785400  | -4.00433400 |
| H | 12.06125300 | 3.70312600  | -2.41007000 |

|   |             |            |             |
|---|-------------|------------|-------------|
| H | 12.06123900 | 4.40161300 | -0.38483000 |
| H | 12.06128200 | 3.93890300 | 2.00191400  |
| H | 12.06127900 | 2.53390500 | 3.61918000  |
| H | 12.06130200 | 0.23560700 | 4.41172100  |

**(7,7) tube**

|   |              |             |             |
|---|--------------|-------------|-------------|
| H | -12.06287700 | 5.10292600  | -0.03658200 |
| H | -12.06290800 | 4.50870600  | -2.38972100 |
| H | -12.06272900 | 3.15290300  | -4.01253000 |
| H | -12.06267900 | 0.94272100  | -5.01533000 |
| H | -12.06269400 | -1.17164700 | -4.96701300 |
| H | -12.06266200 | -3.33362500 | -3.86407900 |
| H | -12.06289100 | -4.61337400 | -2.18076100 |
| H | -12.06290000 | -5.09924400 | 0.19709700  |
| H | -12.06280300 | 4.68012800  | 2.03502700  |
| H | -12.06272200 | 3.21016600  | 3.96640800  |
| H | -12.06270200 | 1.32670800  | 4.92742900  |
| H | -12.06265300 | -1.09970600 | 4.98301500  |
| H | -12.06271600 | -3.02490400 | 4.10918100  |
| H | -12.06283800 | -4.58177700 | 2.24727300  |
| C | -11.10946200 | 4.90876000  | -0.52583100 |
| C | -11.10945300 | 4.57002300  | -1.86702500 |
| C | -11.10933800 | 2.64913300  | -4.16521300 |
| C | -11.10930400 | 1.38944200  | -4.73682700 |
| C | -11.10929600 | -1.60510200 | -4.66834300 |
| C | -11.10929900 | -2.83732000 | -4.03968400 |
| C | -11.10945600 | -4.65064200 | -1.65576900 |
| C | -11.10947400 | -4.92763800 | -0.30047900 |
| C | -11.10939400 | 4.30936800  | 2.40866300  |
| C | -11.10936100 | 3.47155900  | 3.50941300  |
| C | -11.10928700 | 0.80343500  | 4.87050500  |
| C | -11.10926600 | -0.57952800 | 4.90219600  |
| C | -11.10934400 | -3.30701000 | 3.66469600  |
| C | -11.10938500 | -4.19440100 | 2.60351000  |
| C | -9.91082700  | 4.85451400  | 0.24990500  |
| C | -9.91082300  | 4.15373500  | -2.52390100 |

|   |             |             |             |
|---|-------------|-------------|-------------|
| C | -9.91078300 | 3.22160600  | -3.63868600 |
| C | -9.91072500 | 0.61624900  | -4.82090700 |
| C | -9.91071700 | -0.83652500 | -4.78768500 |
| C | -9.91075000 | -3.38501300 | -3.48744100 |
| C | -9.91079500 | -4.26498600 | -2.33102500 |
| C | -9.91084000 | -4.83797400 | 0.47200200  |
| C | -9.91079200 | 4.56361200  | 1.67363800  |
| C | -9.91074400 | 2.83097100  | 3.95030900  |
| C | -9.91071800 | 1.53653600  | 4.61062700  |
| C | -9.91068100 | -1.32367500 | 4.67618400  |
| C | -9.91069400 | -2.64696800 | 4.07579600  |
| C | -9.91079600 | -4.48219900 | 1.88095700  |
| C | -8.67610500 | 4.77926200  | -0.46521900 |
| C | -8.67609900 | 4.42716600  | -1.85883100 |
| C | -8.67604100 | 2.61545200  | -4.02540500 |
| C | -8.67601300 | 1.30654900  | -4.61941100 |
| C | -8.67600600 | -1.51689500 | -4.55477100 |
| C | -8.67602100 | -2.79724200 | -3.90151700 |
| C | -8.67609900 | -4.50756800 | -1.65406400 |
| C | -8.67611900 | -4.79550400 | -0.24577600 |
| C | -8.67605700 | 4.21368800  | 2.30178000  |
| C | -8.67603900 | 3.34311700  | 3.44556600  |
| C | -8.67598500 | 0.82728200  | 4.72885200  |
| C | -8.67597500 | -0.60974300 | 4.76177100  |
| C | -8.67602000 | -3.18171800 | 3.59501900  |
| C | -8.67605600 | -4.10385600 | 2.49239800  |
| C | -7.42935300 | 4.78418400  | 0.25035500  |
| C | -7.42934900 | 4.09156200  | -2.49085100 |
| C | -7.42932300 | 3.17804200  | -3.58312000 |
| C | -7.42926500 | 0.60323800  | -4.75133000 |
| C | -7.42926600 | -0.82032600 | -4.71877200 |
| C | -7.42930800 | -3.33892000 | -3.43387400 |
| C | -7.42933700 | -4.20133900 | -2.30081100 |
| C | -7.42936500 | -4.76775400 | 0.46930400  |
| C | -7.42933300 | 4.49898900  | 1.64545300  |
| C | -7.42928400 | 2.78664000  | 3.89535100  |

|   |             |             |             |
|---|-------------|-------------|-------------|
| C | -7.42927100 | 1.51823400  | 4.54238100  |
| C | -7.42925300 | -1.30846300 | 4.60712500  |
| C | -7.42926400 | -2.60516300 | 4.01881300  |
| C | -7.42933500 | -4.41903300 | 1.84987600  |
| C | -6.19040300 | 4.77995500  | -0.46693800 |
| C | -6.19040100 | 4.42860800  | -1.85765200 |
| C | -6.19035400 | 2.61451800  | -4.02681100 |
| C | -6.19033200 | 1.30832800  | -4.61953900 |
| C | -6.19033000 | -1.51866300 | -4.55478400 |
| C | -6.19034400 | -2.79635800 | -3.90292800 |
| C | -6.19039800 | -4.50892300 | -1.65277700 |
| C | -6.19040600 | -4.79627000 | -0.24742200 |
| C | -6.19036700 | 4.21357000  | 2.30348900  |
| C | -6.19034700 | 3.34478700  | 3.44487100  |
| C | -6.19032200 | 0.82583100  | 4.72977300  |
| C | -6.19031200 | -0.60821400 | 4.76255200  |
| C | -6.19033500 | -3.18341500 | 3.59439700  |
| C | -6.19036500 | -4.10367800 | 2.49410400  |
| C | -4.95518800 | 4.80068600  | 0.24876000  |
| C | -4.95518600 | 4.10687700  | -2.49730100 |
| C | -4.95516600 | 3.18713500  | -3.59695900 |
| C | -4.95512900 | 0.60770400  | -4.76712900 |
| C | -4.95513000 | -0.82551900 | -4.73436600 |
| C | -4.95515900 | -3.34862000 | -3.44724900 |
| C | -4.95518200 | -4.21691300 | -2.30652200 |
| C | -4.95519000 | -4.78432200 | 0.46848200  |
| C | -4.95517600 | 4.51354000  | 1.65331500  |
| C | -4.95513900 | 2.79810800  | 3.90716900  |
| C | -4.95513100 | 1.52111600  | 4.55860400  |
| C | -4.95512400 | -1.31058700 | 4.62345900  |
| C | -4.95513300 | -2.61606000 | 4.03112000  |
| C | -4.95517300 | -4.43321100 | 1.85840600  |
| C | -3.71458500 | 4.78391500  | -0.47051400 |
| C | -3.71458400 | 4.43380300  | -1.85639400 |
| C | -3.71455700 | 2.61419600  | -4.03205200 |
| C | -3.71454300 | 1.31252600  | -4.62269100 |

|   |             |             |             |
|---|-------------|-------------|-------------|
| C | -3.71454300 | -1.52300200 | -4.55772800 |
| C | -3.71455200 | -2.79627700 | -3.90816800 |
| C | -3.71458100 | -4.51403900 | -1.65126400 |
| C | -3.71458300 | -4.80037800 | -0.25080200 |
| C | -3.71456400 | 4.21576900  | 2.30825300  |
| C | -3.71455000 | 3.34999300  | 3.44565500  |
| C | -3.71453800 | 0.82344700  | 4.73446300  |
| C | -3.71453400 | -0.60561400 | 4.76713100  |
| C | -3.71454500 | -3.18856400 | 3.59541200  |
| C | -3.71456200 | -4.10565500 | 2.49897200  |
| C | -2.47543500 | 4.80440500  | 0.24871700  |
| C | -2.47543400 | 4.11017200  | -2.49903300 |
| C | -2.47542300 | 3.18942900  | -3.59984700 |
| C | -2.47540800 | 0.60838700  | -4.77070400 |
| C | -2.47540900 | -0.82636700 | -4.73790100 |
| C | -2.47542100 | -3.35104600 | -3.45002600 |
| C | -2.47543100 | -4.22028000 | -2.30809500 |
| C | -2.47543600 | -4.78804400 | 0.46861900  |
| C | -2.47542900 | 4.51693400  | 1.65476500  |
| C | -2.47541200 | 2.80042300  | 3.90999900  |
| C | -2.47540800 | 1.52207000  | 4.56213200  |
| C | -2.47540600 | -1.31137500 | 4.62703800  |
| C | -2.47540900 | -2.61823500 | 4.03405400  |
| C | -2.47542700 | -4.43654000 | 1.86002200  |
| C | -1.23970200 | 4.78743400  | -0.46872900 |
| C | -1.23970200 | 4.43604900  | -1.85963600 |
| C | -1.23969400 | 2.61777400  | -4.03364600 |
| C | -1.23968800 | 1.31138100  | -4.62642000 |
| C | -1.23968800 | -1.52202900 | -4.56150000 |
| C | -1.23969200 | -2.79992500 | -3.90959600 |
| C | -1.23970200 | -4.51642900 | -1.65439600 |
| C | -1.23970200 | -4.80381300 | -0.24885200 |
| C | -1.23969600 | 4.21969000  | 2.30795700  |
| C | -1.23969200 | 3.35076500  | 3.44948000  |
| C | -1.23968700 | 0.82610800  | 4.73732200  |
| C | -1.23968600 | -0.60813500 | 4.77010900  |

|   |             |             |             |
|---|-------------|-------------|-------------|
| C | -1.23969100 | -3.18915900 | 3.59927600  |
| C | -1.23969600 | -4.10958600 | 2.49886500  |
| C | 0.00000000  | 4.80069400  | 0.25052700  |
| C | 0.00000000  | 4.10604300  | -2.49886100 |
| C | 0.00000000  | 3.18852800  | -3.59579700 |
| C | 0.00000000  | 0.60594200  | -4.76735400 |
| C | 0.00000000  | -0.82376900 | -4.73466400 |
| C | 0.00000000  | -3.34996100 | -3.44602200 |
| C | 0.00000000  | -4.21614500 | -2.30811100 |
| C | 0.00000000  | -4.78425800 | 0.47026000  |
| C | 0.00000000  | 4.51423000  | 1.65163000  |
| C | 0.00000000  | 2.79668700  | 3.90820600  |
| C | 0.00000000  | 1.52282500  | 4.55804400  |
| C | 0.00000000  | -1.31231300 | 4.62298900  |
| C | 0.00000000  | -2.61458400 | 4.03209700  |
| C | 0.00000000  | -4.43398300 | 1.85677100  |
| C | 1.23970100  | 4.78743500  | -0.46872900 |
| C | 1.23970100  | 4.43604900  | -1.85963600 |
| C | 1.23969300  | 2.61777400  | -4.03364600 |
| C | 1.23968800  | 1.31138100  | -4.62642000 |
| C | 1.23968700  | -1.52202900 | -4.56150100 |
| C | 1.23969100  | -2.79992500 | -3.90959600 |
| C | 1.23970100  | -4.51642900 | -1.65439600 |
| C | 1.23970100  | -4.80381300 | -0.24885200 |
| C | 1.23969600  | 4.21969000  | 2.30795800  |
| C | 1.23969100  | 3.35076500  | 3.44948100  |
| C | 1.23968600  | 0.82610800  | 4.73732200  |
| C | 1.23968600  | -0.60813600 | 4.77010900  |
| C | 1.23969000  | -3.18915900 | 3.59927600  |
| C | 1.23969500  | -4.10958600 | 2.49886500  |
| C | 2.47543500  | 4.80440600  | 0.24871700  |
| C | 2.47543300  | 4.11017300  | -2.49903400 |
| C | 2.47542300  | 3.18943000  | -3.59984700 |
| C | 2.47540700  | 0.60838700  | -4.77070400 |
| C | 2.47540800  | -0.82636700 | -4.73790200 |
| C | 2.47542100  | -3.35104600 | -3.45002700 |



|   |            |             |             |
|---|------------|-------------|-------------|
| C | 2.47543100 | -4.22028100 | -2.30809500 |
| C | 2.47543500 | -4.78804500 | 0.46861900  |
| C | 2.47542800 | 4.51693400  | 1.65476500  |
| C | 2.47541100 | 2.80042300  | 3.91000000  |
| C | 2.47540800 | 1.52207000  | 4.56213300  |
| C | 2.47540600 | -1.31137500 | 4.62703800  |
| C | 2.47540800 | -2.61823500 | 4.03405400  |
| C | 2.47542600 | -4.43654100 | 1.86002200  |
| C | 3.71458500 | 4.78391700  | -0.47051400 |
| C | 3.71458300 | 4.43380400  | -1.85639400 |
| C | 3.71455600 | 2.61419700  | -4.03205300 |
| C | 3.71454300 | 1.31252600  | -4.62269100 |
| C | 3.71454200 | -1.52300200 | -4.55772800 |
| C | 3.71455200 | -2.79627800 | -3.90816900 |
| C | 3.71458100 | -4.51404000 | -1.65126500 |
| C | 3.71458300 | -4.80037900 | -0.25080200 |
| C | 3.71456400 | 4.21577000  | 2.30825300  |
| C | 3.71455000 | 3.34999300  | 3.44565600  |
| C | 3.71453800 | 0.82344700  | 4.73446400  |
| C | 3.71453400 | -0.60561400 | 4.76713200  |
| C | 3.71454500 | -3.18856500 | 3.59541300  |
| C | 3.71456100 | -4.10565600 | 2.49897200  |
| C | 4.95518700 | 4.80068700  | 0.24876000  |
| C | 4.95518600 | 4.10687800  | -2.49730100 |
| C | 4.95516600 | 3.18713500  | -3.59695900 |
| C | 4.95512800 | 0.60770500  | -4.76713000 |
| C | 4.95513000 | -0.82551900 | -4.73436700 |
| C | 4.95515900 | -3.34862000 | -3.44725000 |
| C | 4.95518200 | -4.21691400 | -2.30652300 |
| C | 4.95519000 | -4.78432300 | 0.46848200  |
| C | 4.95517600 | 4.51354100  | 1.65331500  |
| C | 4.95513800 | 2.79810900  | 3.90717000  |
| C | 4.95513000 | 1.52111600  | 4.55860500  |
| C | 4.95512400 | -1.31058700 | 4.62346000  |
| C | 4.95513300 | -2.61606100 | 4.03112000  |
| C | 4.95517200 | -4.43321200 | 1.85840600  |

|   |            |             |             |
|---|------------|-------------|-------------|
| C | 6.19040300 | 4.77995700  | -0.46693800 |
| C | 6.19040100 | 4.42860900  | -1.85765300 |
| C | 6.19035400 | 2.61451900  | -4.02681200 |
| C | 6.19033200 | 1.30832800  | -4.61953900 |
| C | 6.19033000 | -1.51866300 | -4.55478500 |
| C | 6.19034400 | -2.79635900 | -3.90292900 |
| C | 6.19039800 | -4.50892400 | -1.65277800 |
| C | 6.19040600 | -4.79627100 | -0.24742200 |
| C | 6.19036700 | 4.21357100  | 2.30349000  |
| C | 6.19034700 | 3.34478800  | 3.44487200  |
| C | 6.19032200 | 0.82583100  | 4.72977400  |
| C | 6.19031200 | -0.60821400 | 4.76255300  |
| C | 6.19033500 | -3.18341600 | 3.59439800  |
| C | 6.19036500 | -4.10367900 | 2.49410400  |
| C | 7.42935300 | 4.78418500  | 0.25035600  |
| C | 7.42934900 | 4.09156300  | -2.49085200 |
| C | 7.42932400 | 3.17804200  | -3.58312100 |
| C | 7.42926500 | 0.60323800  | -4.75133100 |
| C | 7.42926600 | -0.82032600 | -4.71877300 |
| C | 7.42930800 | -3.33892100 | -3.43387500 |
| C | 7.42933800 | -4.20134000 | -2.30081200 |
| C | 7.42936500 | -4.76775500 | 0.46930400  |
| C | 7.42933300 | 4.49899000  | 1.64545300  |
| C | 7.42928400 | 2.78664100  | 3.89535200  |
| C | 7.42927100 | 1.51823400  | 4.54238200  |
| C | 7.42925300 | -1.30846300 | 4.60712600  |
| C | 7.42926400 | -2.60516300 | 4.01881300  |
| C | 7.42933500 | -4.41903400 | 1.84987600  |
| C | 8.67610500 | 4.77926300  | -0.46521900 |
| C | 8.67610000 | 4.42716700  | -1.85883100 |
| C | 8.67604200 | 2.61545300  | -4.02540600 |
| C | 8.67601400 | 1.30654900  | -4.61941200 |
| C | 8.67600700 | -1.51689500 | -4.55477200 |
| C | 8.67602200 | -2.79724200 | -3.90151800 |
| C | 8.67610000 | -4.50756900 | -1.65406400 |
| C | 8.67611900 | -4.79550500 | -0.24577600 |

|   |             |             |             |
|---|-------------|-------------|-------------|
| C | 8.67605800  | 4.21368900  | 2.30178100  |
| C | 8.67603900  | 3.34311800  | 3.44556600  |
| C | 8.67598600  | 0.82728200  | 4.72885200  |
| C | 8.67597600  | -0.60974300 | 4.76177100  |
| C | 8.67602100  | -3.18171800 | 3.59502000  |
| C | 8.67605700  | -4.10385600 | 2.49239800  |
| C | 9.91082700  | 4.85451500  | 0.24990500  |
| C | 9.91082400  | 4.15373600  | -2.52390200 |
| C | 9.91078400  | 3.22160700  | -3.63868700 |
| C | 9.91072500  | 0.61624900  | -4.82090800 |
| C | 9.91071800  | -0.83652500 | -4.78768600 |
| C | 9.91075000  | -3.38501300 | -3.48744200 |
| C | 9.91079600  | -4.26498600 | -2.33102600 |
| C | 9.91084000  | -4.83797500 | 0.47200200  |
| C | 9.91079300  | 4.56361300  | 1.67363800  |
| C | 9.91074500  | 2.83097200  | 3.95031000  |
| C | 9.91071900  | 1.53653600  | 4.61062800  |
| C | 9.91068200  | -1.32367500 | 4.67618500  |
| C | 9.91069500  | -2.64696900 | 4.07579700  |
| C | 9.91079600  | -4.48220000 | 1.88095700  |
| C | 11.10946300 | 4.90876000  | -0.52583100 |
| C | 11.10945400 | 4.57002300  | -1.86702500 |
| C | 11.10933900 | 2.64913300  | -4.16521400 |
| C | 11.10930400 | 1.38944200  | -4.73682800 |
| C | 11.10929700 | -1.60510200 | -4.66834300 |
| C | 11.10930000 | -2.83732000 | -4.03968400 |
| C | 11.10945700 | -4.65064300 | -1.65576900 |
| C | 11.10947500 | -4.92763800 | -0.30047900 |
| C | 11.10939400 | 4.30936900  | 2.40866300  |
| C | 11.10936200 | 3.47156000  | 3.50941300  |
| C | 11.10928800 | 0.80343600  | 4.87050600  |
| C | 11.10926700 | -0.57952800 | 4.90219600  |
| C | 11.10934400 | -3.30701100 | 3.66469600  |
| C | 11.10938600 | -4.19440100 | 2.60351000  |
| H | 12.06287900 | 5.10292400  | -0.03658100 |
| H | 12.06290900 | 4.50870400  | -2.38972100 |

|   |             |             |             |
|---|-------------|-------------|-------------|
| H | 12.06273000 | 3.15290400  | -4.01253100 |
| H | 12.06268000 | 0.94272200  | -5.01533100 |
| H | 12.06269500 | -1.17164600 | -4.96701200 |
| H | 12.06266400 | -3.33362500 | -3.86407800 |
| H | 12.06289200 | -4.61337500 | -2.18076200 |
| H | 12.06290100 | -5.09924500 | 0.19709700  |
| H | 12.06280400 | 4.68012900  | 2.03502600  |
| H | 12.06272300 | 3.21016700  | 3.96640700  |
| H | 12.06270300 | 1.32670800  | 4.92742900  |
| H | 12.06265400 | -1.09970600 | 4.98301500  |
| H | 12.06271700 | -3.02490500 | 4.10918100  |
| H | 12.06283900 | -4.58177800 | 2.24727300  |

**(8,8) tube**

|   |             |             |             |
|---|-------------|-------------|-------------|
| H | 12.06373400 | -2.07426800 | 5.40759300  |
| H | 12.06389600 | -4.10525300 | 4.08486800  |
| H | 12.06389900 | -5.28968100 | 2.35635100  |
| H | 12.06381400 | -5.79126800 | -0.01479300 |
| H | 12.06369900 | -5.40781000 | -2.07437100 |
| H | 12.06386200 | -4.08504900 | -4.10538100 |
| H | 12.06389500 | -2.35640700 | -5.28960500 |
| H | 12.06382600 | 0.01473100  | -5.79120100 |
| H | 12.06381600 | -0.01472600 | 5.79127200  |
| H | 12.06388900 | 2.35641700  | 5.28968000  |
| H | 12.06387500 | 4.08497600  | 4.10532500  |
| H | 12.06371200 | 5.40773400  | 2.07432300  |
| H | 12.06380800 | 5.79132900  | 0.01477200  |
| H | 12.06388800 | 5.28973700  | -2.35637400 |
| H | 12.06389300 | 4.10526200  | -4.08486700 |
| H | 12.06373500 | 2.07427700  | -5.40759200 |
| C | 11.10992000 | -2.46993800 | 5.06194800  |
| C | 11.10997400 | -3.62932100 | 4.30684500  |
| C | 11.10997500 | -5.32530600 | 1.83243300  |
| C | 11.10993800 | -5.61164700 | 0.47878100  |
| C | 11.10990300 | -5.06208100 | -2.47001400 |
| C | 11.10995600 | -4.30697400 | -3.62938800 |

|   |             |             |             |
|---|-------------|-------------|-------------|
| C | 11.10997300 | -1.83248800 | -5.32526100 |
| C | 11.10994400 | -0.47883200 | -5.61158400 |
| C | 11.10993800 | 0.47883500  | 5.61162500  |
| C | 11.10997000 | 1.83249100  | 5.32530000  |
| C | 11.10996500 | 4.30693400  | 3.62936000  |
| C | 11.10991100 | 5.06204100  | 2.46998500  |
| C | 11.10993300 | 5.61167800  | -0.47879400 |
| C | 11.10996900 | 5.32533900  | -1.83244700 |
| C | 11.10997200 | 3.62933000  | -4.30684600 |
| C | 11.10992100 | 2.46994400  | -5.06194600 |
| C | 9.91206400  | -1.72298100 | 5.27451800  |
| C | 9.91214400  | -4.12595300 | 3.70963800  |
| C | 9.91215200  | -4.94747700 | 2.51100900  |
| C | 9.91204300  | -5.54082100 | -0.29454800 |
| C | 9.91204900  | -5.27460800 | -1.72302500 |
| C | 9.91212800  | -3.70971700 | -4.12598600 |
| C | 9.91214300  | -2.51106500 | -4.94746400 |
| C | 9.91205500  | 0.29450500  | -5.54075300 |
| C | 9.91205300  | -0.29450600 | 5.54076900  |
| C | 9.91214500  | 2.51106200  | 4.94747200  |
| C | 9.91213300  | 3.70970400  | 4.12597700  |
| C | 9.91205200  | 5.27459600  | 1.72301500  |
| C | 9.91204300  | 5.54082700  | 0.29454100  |
| C | 9.91214800  | 4.94749000  | -2.51101700 |
| C | 9.91214200  | 4.12596100  | -3.70964200 |
| C | 9.91206600  | 1.72298300  | -5.27451200 |
| C | 8.67709000  | -2.36411400 | 4.94817400  |
| C | 8.67712200  | -3.56825400 | 4.16396100  |
| C | 8.67710700  | -5.17006600 | 1.82699800  |
| C | 8.67708600  | -5.46750600 | 0.42110200  |
| C | 8.67707600  | -4.94825100 | -2.36414700 |
| C | 8.67710800  | -4.16402900 | -3.56828400 |
| C | 8.67710300  | -1.82703900 | -5.17004600 |
| C | 8.67709300  | -0.42113600 | -5.46745200 |
| C | 8.67709100  | 0.42113600  | 5.46745500  |
| C | 8.67710300  | 1.82703800  | 5.17005100  |

|   |            |             |             |
|---|------------|-------------|-------------|
| C | 8.67711200 | 4.16402300  | 3.56827900  |
| C | 8.67708000 | 4.94824500  | 2.36414200  |
| C | 8.67708600 | 5.46750800  | -0.42110600 |
| C | 8.67710300 | 5.17007100  | -1.82700300 |
| C | 8.67712000 | 3.56825800  | -4.16396300 |
| C | 8.67709100 | 2.36411500  | -4.94817000 |
| C | 7.43061600 | -1.69417100 | 5.19976200  |
| C | 7.43064500 | -4.06948000 | 3.65315800  |
| C | 7.43064100 | -4.87435800 | 2.47863700  |
| C | 7.43060800 | -5.46072200 | -0.29451200 |
| C | 7.43060400 | -5.19983200 | -1.69420000 |
| C | 7.43063300 | -3.65320800 | -4.06949400 |
| C | 7.43063400 | -2.47867200 | -4.87434800 |
| C | 7.43061800 | 0.29448700  | -5.46066600 |
| C | 7.43061600 | -0.29448700 | 5.46067300  |
| C | 7.43063500 | 2.47866900  | 4.87434100  |
| C | 7.43063600 | 3.65321000  | 4.06949500  |
| C | 7.43060600 | 5.19983100  | 1.69419800  |
| C | 7.43060800 | 5.46071800  | 0.29451100  |
| C | 7.43063900 | 4.87435900  | -2.47863800 |
| C | 7.43064300 | 4.06948100  | -3.65315900 |
| C | 7.43061700 | 1.69417200  | -5.19976600 |
| C | 6.19161000 | -2.36291500 | 4.94288000  |
| C | 6.19162100 | -3.56392700 | 4.16068100  |
| C | 6.19161500 | -5.16540000 | 1.82412000  |
| C | 6.19159900 | -5.46199500 | 0.42185700  |
| C | 6.19159700 | -4.94293400 | -2.36293500 |
| C | 6.19160800 | -4.16072800 | -3.56394100 |
| C | 6.19161200 | -1.82414600 | -5.16538400 |
| C | 6.19160400 | -0.42187600 | -5.46194600 |
| C | 6.19160300 | 0.42187600  | 5.46193300  |
| C | 6.19161300 | 1.82414900  | 5.16539000  |
| C | 6.19161100 | 4.16072700  | 3.56394000  |
| C | 6.19159900 | 4.94293400  | 2.36293500  |
| C | 6.19159900 | 5.46199100  | -0.42185700 |
| C | 6.19161300 | 5.16539700  | -1.82412000 |

|   |            |             |             |
|---|------------|-------------|-------------|
| C | 6.19161900 | 3.56392700  | -4.16068400 |
| C | 6.19161000 | 2.36291300  | -4.94287700 |
| C | 4.95573900 | -1.70108200 | 5.21337200  |
| C | 4.95574600 | -4.07917900 | 3.66500200  |
| C | 4.95574100 | -4.88885500 | 2.48339000  |
| C | 4.95573100 | -5.47587800 | -0.29299300 |
| C | 4.95572800 | -5.21343300 | -1.70110200 |
| C | 4.95573600 | -3.66504000 | -4.07918700 |
| C | 4.95573400 | -2.48341000 | -4.88883700 |
| C | 4.95573800 | 0.29297900  | -5.47583900 |
| C | 4.95573800 | -0.29297800 | 5.47584600  |
| C | 4.95573500 | 2.48340800  | 4.88882800  |
| C | 4.95573900 | 3.66504600  | 4.07919300  |
| C | 4.95572900 | 5.21343400  | 1.70110400  |
| C | 4.95573000 | 5.47587200  | 0.29299400  |
| C | 4.95573900 | 4.88885100  | -2.48338900 |
| C | 4.95574500 | 4.07917900  | -3.66500400 |
| C | 4.95573900 | 1.70108400  | -5.21338300 |
| C | 3.71508500 | -2.36872400 | 4.94776400  |
| C | 3.71508700 | -3.56605500 | 4.16796500  |
| C | 3.71508200 | -5.17294800 | 1.82346500  |
| C | 3.71507600 | -5.46862000 | 0.42549400  |
| C | 3.71507300 | -4.94780200 | -2.36873500 |
| C | 3.71507600 | -4.16799300 | -3.56605700 |
| C | 3.71508000 | -1.82348200 | -5.17293400 |
| C | 3.71507800 | -0.42550300 | -5.46857500 |
| C | 3.71507900 | 0.42550400  | 5.46856100  |
| C | 3.71508100 | 1.82348800  | 5.17294700  |
| C | 3.71507700 | 4.16799400  | 3.56605900  |
| C | 3.71507300 | 4.94780200  | 2.36873600  |
| C | 3.71507400 | 5.46861600  | -0.42549300 |
| C | 3.71508000 | 5.17294400  | -1.82346400 |
| C | 3.71508600 | 3.56605400  | -4.16796800 |
| C | 3.71508500 | 2.36872400  | -4.94776500 |
| C | 2.47594100 | -1.70295100 | 5.21849100  |
| C | 2.47594300 | -4.08311000 | 3.66877500  |

|   |             |             |             |
|---|-------------|-------------|-------------|
| C | 2.47594000  | -4.89378800 | 2.48569000  |
| C | 2.47593300  | -5.48130200 | -0.29310600 |
| C | 2.47593000  | -5.21853500 | -1.70296200 |
| C | 2.47593300  | -3.66880200 | -4.08311200 |
| C | 2.47593400  | -2.48569700 | -4.89376000 |
| C | 2.47593900  | 0.29310100  | -5.48127500 |
| C | 2.47594000  | -0.29310000 | 5.48128200  |
| C | 2.47593400  | 2.48569700  | 4.89375700  |
| C | 2.47593400  | 3.66880900  | 4.08312100  |
| C | 2.47593000  | 5.21853700  | 1.70296500  |
| C | 2.47593200  | 5.48129300  | 0.29310700  |
| C | 2.47593900  | 4.89378100  | -2.48568800 |
| C | 2.47594200  | 4.08311300  | -3.66878100 |
| C | 2.47594000  | 1.70295400  | -5.21850100 |
| C | 1.23970000  | -2.36852200 | 4.95187000  |
| C | 1.23969900  | -3.56990300 | 4.16944700  |
| C | 1.23969200  | -5.17569000 | 1.82651000  |
| C | 1.23969000  | -5.47235000 | 0.42382100  |
| C | 1.23968700  | -4.95189700 | -2.36852600 |
| C | 1.23968800  | -4.16945800 | -3.56989300 |
| C | 1.23969000  | -1.82651600 | -5.17567400 |
| C | 1.23969200  | -0.42382200 | -5.47230900 |
| C | 1.23969300  | 0.42382300  | 5.47230100  |
| C | 1.23969100  | 1.82652400  | 5.17568600  |
| C | 1.23968800  | 4.16946400  | 3.56989900  |
| C | 1.23968800  | 4.95189400  | 2.36852700  |
| C | 1.23968900  | 5.47234500  | -0.42382000 |
| C | 1.23969100  | 5.17568400  | -1.82650900 |
| C | 1.23969800  | 3.56990100  | -4.16944800 |
| C | 1.23969800  | 2.36852600  | -4.95187800 |
| C | 0.00000600  | -1.70036200 | 5.21656600  |
| C | 0.00000500  | -4.08240600 | 3.66563000  |
| C | 0.00000400  | -4.89059000 | 2.48616600  |
| C | -0.00000400 | -5.47855000 | -0.29483200 |
| C | -0.00000600 | -5.21658700 | -1.70036100 |
| C | -0.00000500 | -3.66564200 | -4.08240100 |



|   |             |             |             |
|---|-------------|-------------|-------------|
| C | -0.0000300  | -2.48616100 | -4.89055500 |
| C | 0.0000400   | 0.29483700  | -5.47853600 |
| C | 0.0000500   | -0.29483400 | 5.47853500  |
| C | -0.0000200  | 2.48616500  | 4.89055900  |
| C | -0.0000500  | 3.66564700  | 4.08240700  |
| C | -0.0000500  | 5.21659300  | 1.70036600  |
| C | -0.0000400  | 5.47853700  | 0.29483300  |
| C | 0.0000200   | 4.89058100  | -2.48616300 |
| C | 0.0000400   | 4.08241000  | -3.66563700 |
| C | 0.0000500   | 1.70036400  | -5.21657200 |
| C | -1.23968600 | -2.36852600 | 4.95187700  |
| C | -1.23968700 | -3.56990700 | 4.16945500  |
| C | -1.23969100 | -5.17569300 | 1.82651600  |
| C | -1.23969300 | -5.47234200 | 0.42382500  |
| C | -1.23969900 | -4.95189100 | -2.36852100 |
| C | -1.23969900 | -4.16944800 | -3.56988700 |
| C | -1.23969100 | -1.82651100 | -5.17567500 |
| C | -1.23968900 | -0.42381700 | -5.47231200 |
| C | -1.23968900 | 0.42381900  | 5.47230700  |
| C | -1.23969100 | 1.82651600  | 5.17567900  |
| C | -1.23969900 | 4.16945700  | 3.56989700  |
| C | -1.23969800 | 4.95188400  | 2.36852200  |
| C | -1.23969300 | 5.47233900  | -0.42382300 |
| C | -1.23969100 | 5.17568600  | -1.82651500 |
| C | -1.23968800 | 3.56990400  | -4.16945300 |
| C | -1.23968800 | 2.36853100  | -4.95188900 |
| C | -2.47592800 | -1.70296200 | 5.21851000  |
| C | -2.47593300 | -4.08311900 | 3.66879300  |
| C | -2.47593400 | -4.89378700 | 2.48569900  |
| C | -2.47594000 | -5.48129700 | -0.29309800 |
| C | -2.47594100 | -5.21851200 | -1.70294900 |
| C | -2.47594200 | -3.66878700 | -4.08310600 |
| C | -2.47593900 | -2.48568400 | -4.89375500 |
| C | -2.47593300 | 0.29310900  | -5.48128900 |
| C | -2.47593100 | -0.29310700 | 5.48128100  |
| C | -2.47593900 | 2.48569000  | 4.89376000  |

|   |             |             |             |
|---|-------------|-------------|-------------|
| C | -2.47594300 | 3.66878900  | 4.08310800  |
| C | -2.47594100 | 5.21852300  | 1.70295700  |
| C | -2.47593900 | 5.48128400  | 0.29310100  |
| C | -2.47593500 | 4.89377900  | -2.48569700 |
| C | -2.47593400 | 4.08312300  | -3.66879800 |
| C | -2.47593000 | 1.70296300  | -5.21851300 |
| C | -3.71507200 | -2.36873600 | 4.94778400  |
| C | -3.71507500 | -3.56606900 | 4.16799000  |
| C | -3.71508100 | -5.17295500 | 1.82348200  |
| C | -3.71508000 | -5.46859900 | 0.42550600  |
| C | -3.71508500 | -4.94778100 | -2.36872100 |
| C | -3.71508700 | -4.16796400 | -3.56603800 |
| C | -3.71508100 | -1.82346700 | -5.17293600 |
| C | -3.71507500 | -0.42549100 | -5.46858700 |
| C | -3.71507400 | 0.42549300  | 5.46858400  |
| C | -3.71508100 | 1.82346900  | 5.17293400  |
| C | -3.71508800 | 4.16797700  | 3.56605100  |
| C | -3.71508500 | 4.94777600  | 2.36872100  |
| C | -3.71507900 | 5.46860000  | -0.42550300 |
| C | -3.71508000 | 5.17294800  | -1.82347900 |
| C | -3.71507700 | 3.56606300  | -4.16798700 |
| C | -3.71507400 | 2.36874100  | -4.94779500 |
| C | -4.95572600 | -1.70110200 | 5.21341100  |
| C | -4.95573700 | -4.07919600 | 3.66503400  |
| C | -4.95573600 | -4.88885600 | 2.48341000  |
| C | -4.95574000 | -5.47586200 | -0.29297700 |
| C | -4.95573900 | -5.21339200 | -1.70107900 |
| C | -4.95574500 | -3.66501200 | -4.07917400 |
| C | -4.95573900 | -2.48338700 | -4.88883000 |
| C | -4.95573200 | 0.29299500  | -5.47586400 |
| C | -4.95572900 | -0.29299400 | 5.47585600  |
| C | -4.95574000 | 2.48339100  | 4.88883400  |
| C | -4.95574700 | 3.66501300  | 4.07917400  |
| C | -4.95573900 | 5.21340500  | 1.70108700  |
| C | -4.95573800 | 5.47585300  | 0.29297900  |
| C | -4.95573400 | 4.88885000  | -2.48340700 |

|   |             |             |             |
|---|-------------|-------------|-------------|
| C | -4.95573700 | 4.07919700  | -3.66503600 |
| C | -4.95572900 | 1.70110300  | -5.21341200 |
| C | -6.19159600 | -2.36293600 | 4.94291800  |
| C | -6.19160800 | -3.56394800 | 4.16072200  |
| C | -6.19161400 | -5.16540500 | 1.82414700  |
| C | -6.19160600 | -5.46196400 | 0.42187700  |
| C | -6.19161100 | -4.94289400 | -2.36291200 |
| C | -6.19161900 | -4.16068500 | -3.56391600 |
| C | -6.19161400 | -1.82412200 | -5.16538700 |
| C | -6.19159900 | -0.42185600 | -5.46196800 |
| C | -6.19159800 | 0.42185600  | 5.46196800  |
| C | -6.19161400 | 1.82412100  | 5.16538300  |
| C | -6.19162200 | 4.16069200  | 3.56392300  |
| C | -6.19161100 | 4.94289300  | 2.36291200  |
| C | -6.19160300 | 5.46196800  | -0.42187500 |
| C | -6.19161100 | 5.16540100  | -1.82414400 |
| C | -6.19160900 | 3.56394500  | -4.16071900 |
| C | -6.19160000 | 2.36293800  | -4.94292100 |
| C | -7.43060200 | -1.69420000 | 5.19981800  |
| C | -7.43063400 | -4.06950100 | 3.65320200  |
| C | -7.43063600 | -4.87436200 | 2.47867100  |
| C | -7.43061900 | -5.46068800 | -0.29448600 |
| C | -7.43061800 | -5.19977800 | -1.69416900 |
| C | -7.43064200 | -3.65316600 | -4.06947500 |
| C | -7.43063900 | -2.47863900 | -4.87434300 |
| C | -7.43061000 | 0.29451100  | -5.46070000 |
| C | -7.43060600 | -0.29451200 | 5.46070500  |
| C | -7.43064200 | 2.47863600  | 4.87434000  |
| C | -7.43064600 | 3.65316200  | 4.06947000  |
| C | -7.43061600 | 5.19978600  | 1.69417200  |
| C | -7.43061600 | 5.46068800  | 0.29448800  |
| C | -7.43063300 | 4.87436200  | -2.47866800 |
| C | -7.43063500 | 4.06950300  | -3.65320200 |
| C | -7.43060800 | 1.69419700  | -5.19980900 |
| C | -8.67707500 | -2.36414800 | 4.94824100  |
| C | -8.67710700 | -3.56828800 | 4.16402300  |

|   |              |             |             |
|---|--------------|-------------|-------------|
| C | -8.67710600  | -5.17005900 | 1.82703700  |
| C | -8.67709500  | -5.46746700 | 0.42113400  |
| C | -8.67709000  | -4.94818900 | -2.36411600 |
| C | -8.67711900  | -4.16397300 | -3.56825500 |
| C | -8.67710400  | -1.82700500 | -5.17005500 |
| C | -8.67708700  | -0.42110600 | -5.46748500 |
| C | -8.67708500  | 0.42110100  | 5.46749000  |
| C | -8.67710600  | 1.82699800  | 5.17005000  |
| C | -8.67712400  | 4.16396600  | 3.56824600  |
| C | -8.67709200  | 4.94818600  | 2.36411000  |
| C | -8.67708900  | 5.46748200  | -0.42113500 |
| C | -8.67710000  | 5.17007100  | -1.82703800 |
| C | -8.67711000  | 3.56828500  | -4.16401200 |
| C | -8.67708100  | 2.36414400  | -4.94822500 |
| C | -9.91204700  | -1.72302600 | 5.27460000  |
| C | -9.91213000  | -4.12599000 | 3.70971400  |
| C | -9.91214500  | -4.94746900 | 2.51106000  |
| C | -9.91205700  | -5.54076400 | -0.29450900 |
| C | -9.91206500  | -5.27453600 | -1.72299000 |
| C | -9.91214000  | -3.70965600 | -4.12596100 |
| C | -9.91214700  | -2.51102300 | -4.94747200 |
| C | -9.91204500  | 0.29454000  | -5.54079900 |
| C | -9.91204100  | -0.29454900 | 5.54081000  |
| C | -9.91215200  | 2.51100800  | 4.94745900  |
| C | -9.91214600  | 3.70963600  | 4.12593900  |
| C | -9.91206300  | 5.27453200  | 1.72297600  |
| C | -9.91205100  | 5.54079300  | 0.29450500  |
| C | -9.91214100  | 4.94749600  | -2.51106100 |
| C | -9.91213200  | 4.12598900  | -3.70969500 |
| C | -9.91205500  | 1.72301500  | -5.27457200 |
| C | -11.10990100 | -2.47001500 | 5.06208000  |
| C | -11.10995500 | -3.62939300 | 4.30697700  |
| C | -11.10997900 | -5.32525200 | 1.83248000  |
| C | -11.10994900 | -5.61157600 | 0.47882400  |
| C | -11.10991700 | -5.06199100 | -2.46996700 |
| C | -11.10996700 | -4.30688800 | -3.62934800 |

|   |              |             |             |
|---|--------------|-------------|-------------|
| C | -11.10997200 | -1.83244900 | -5.32530700 |
| C | -11.10993700 | -0.47879700 | -5.61164300 |
| C | -11.10993600 | 0.47878000  | 5.61163600  |
| C | -11.10997500 | 1.83243100  | 5.32529100  |
| C | -11.10997800 | 4.30683900  | 3.62930300  |
| C | -11.10992400 | 5.06194800  | 2.46992700  |
| C | -11.10993600 | 5.61166300  | -0.47883700 |
| C | -11.10996600 | 5.32534000  | -1.83249200 |
| C | -11.10996300 | 3.62936900  | -4.30692000 |
| C | -11.10991100 | 2.46998800  | -5.06202000 |
| H | -12.06369800 | -2.07437300 | 5.40780700  |
| H | -12.06386200 | -4.10538600 | 4.08506100  |
| H | -12.06390300 | -5.28958000 | 2.35639300  |
| H | -12.06383300 | -5.79117000 | -0.01474300 |
| H | -12.06372500 | -5.40767900 | -2.07432000 |
| H | -12.06388400 | -4.08493500 | -4.10530400 |
| H | -12.06389000 | -2.35637600 | -5.28968900 |
| H | -12.06381200 | 0.01477100  | -5.79128500 |
| H | -12.06381200 | -0.01479400 | 5.79126200  |
| H | -12.06389800 | 2.35635000  | 5.28966700  |
| H | -12.06390000 | 4.08485100  | 4.10523100  |
| H | -12.06373600 | 5.40759100  | 2.07424900  |
| H | -12.06381100 | 5.79132900  | 0.01472400  |
| H | -12.06388200 | 5.28974100  | -2.35642600 |
| H | -12.06387700 | 4.10532600  | -4.08496000 |
| H | -12.06371700 | 2.07432900  | -5.40770000 |

**(9,9) tube**

|   |             |             |            |
|---|-------------|-------------|------------|
| C | 11.10936100 | -5.40947600 | 3.28401800 |
| C | 9.91213700  | -5.68956200 | 2.56050300 |
| C | 8.67715900  | -5.29644000 | 3.16333500 |
| C | 8.67715400  | -4.42032400 | 4.30219700 |
| C | 9.91208300  | -3.93848000 | 4.83685600 |
| C | 11.10935400 | -4.56584900 | 4.38064200 |
| C | 7.43104400  | -5.61035700 | 2.51995200 |
| C | 6.19206200  | -5.28596900 | 3.15791600 |

|   |             |             |             |
|---|-------------|-------------|-------------|
| C | 6.19203600  | -4.41240000 | 4.29323900  |
| C | 7.43098100  | -3.87894400 | 4.77044200  |
| C | 4.95584200  | -5.62160400 | 2.52748400  |
| C | 3.71517400  | -5.29197800 | 3.16502600  |
| C | 3.71513900  | -4.42086200 | 4.29705400  |
| C | 4.95576500  | -3.88900200 | 4.77904300  |
| C | 2.47610600  | -5.62818600 | 2.53051200  |
| C | 1.23958400  | -5.29675200 | 3.16566100  |
| C | 1.23954500  | -4.42277600 | 4.30136900  |
| C | 2.47603600  | -3.89365400 | 4.78443200  |
| C | 4.95587600  | -6.05311400 | 1.16263400  |
| C | 3.71524600  | -6.15016100 | 0.45147900  |
| C | 2.47616300  | -6.06033200 | 1.16381500  |
| C | 6.19214300  | -6.14102600 | 0.45394000  |
| C | 6.19216500  | -6.07949500 | -0.97719100 |
| C | 4.95590900  | -5.93095600 | -1.67573100 |
| C | 3.71528200  | -6.08877800 | -0.97555500 |
| C | 7.43109500  | -6.03955000 | 1.16243900  |
| C | 8.67726800  | -6.15267100 | 0.45566400  |
| C | 8.67727900  | -6.09098100 | -0.97984400 |
| C | 7.43113700  | -5.91754200 | -1.67434900 |
| C | 9.91220400  | -6.12762600 | 1.17500300  |
| C | 11.10946500 | -6.31438800 | 0.42209700  |
| C | 11.10946900 | -6.25495300 | -0.96020100 |
| C | 9.91224100  | -6.00424600 | -1.69434700 |
| C | 7.43114100  | -5.37321000 | -2.98994200 |
| C | 8.67728200  | -5.00531000 | -3.60397300 |
| C | 9.91225500  | -5.44869300 | -3.03705400 |
| C | 6.19216700  | -4.99529600 | -3.59769400 |
| C | 4.95591200  | -5.38366200 | -2.99839600 |
| C | 3.71528200  | -5.00068100 | -3.60536700 |
| C | 2.47621400  | -5.38996500 | -3.00205500 |
| C | 2.47620800  | -5.93801500 | -1.67759600 |
| C | 1.23968000  | -6.09298800 | -0.97813500 |
| C | 1.23967100  | -6.15450600 | 0.45356400  |
| C | 1.23968700  | -5.00545500 | -3.60652200 |

|   |             |             |             |
|---|-------------|-------------|-------------|
| C | 0.00009000  | -5.38963600 | -2.99983700 |
| C | 0.00010800  | -5.93610900 | -1.67893800 |
| C | -1.23950600 | -6.09314900 | -0.97820500 |
| C | -1.23952900 | -6.15459500 | 0.45349200  |
| C | 0.00003900  | -6.05842500 | 1.16518400  |
| C | 0.00000300  | -5.62743400 | 2.52813800  |
| C | -0.00007700 | -3.89123600 | 4.78419700  |
| C | -1.23967500 | -4.42276700 | 4.30128600  |
| C | -1.23963100 | -5.29674400 | 3.16557100  |
| C | -2.47610900 | -5.62819500 | 2.53035100  |
| C | -2.47605700 | -6.06041700 | 1.16366700  |
| C | -3.71521400 | -5.29199600 | 3.16476700  |
| C | -3.71526700 | -4.42083100 | 4.29675800  |
| C | -2.47620400 | -3.89364000 | 4.78424600  |
| C | -2.47623000 | -2.68352300 | 5.55250100  |
| C | -1.23971900 | -2.02120600 | 5.82568500  |
| C | -0.00010200 | -2.68444300 | 5.55035200  |
| C | 1.23950200  | -2.02121600 | 5.82579700  |
| C | 2.47602300  | -2.68355300 | 5.55270700  |
| C | -4.95593500 | -3.88893900 | 4.77861700  |
| C | -4.95596700 | -2.68046200 | 5.54579000  |
| C | -3.71531800 | -2.01799300 | 5.82198900  |
| C | -3.71530700 | -0.62309100 | 6.12925400  |
| C | -2.47621300 | 0.09400900  | 6.16423300  |
| C | -1.23971000 | -0.62176500 | 6.13397800  |
| C | -0.00009400 | 0.09573900  | 6.16272700  |
| C | 1.23951000  | -0.62178900 | 6.13413500  |
| C | -0.00005000 | 1.51288000  | 5.97551200  |
| C | -1.23963500 | 2.19828800  | 5.76115900  |
| C | -2.47616400 | 1.51504000  | 5.97647800  |
| C | -3.71522800 | 2.19845300  | 5.75622400  |
| C | -4.95590200 | 1.51317200  | 5.96939500  |
| C | -4.95594600 | 0.09409500  | 6.15689300  |
| C | -6.19222100 | -0.61907100 | 6.12067000  |
| C | -6.19223100 | -2.01799400 | 5.81254500  |
| C | -3.71516400 | 3.46553500  | 5.09690800  |

|   |             |            |             |
|---|-------------|------------|-------------|
| C | -2.47605800 | 4.03792100 | 4.66344400  |
| C | -1.23957500 | 3.46948100 | 5.09961500  |
| C | 0.00007700  | 4.03813500 | 4.66111700  |
| C | 1.23962300  | 3.46943400 | 5.09972200  |
| C | 1.23958700  | 2.19826800 | 5.76134700  |
| C | 2.47606800  | 1.51499900 | 5.97686600  |
| C | 2.47603200  | 0.09395800 | 6.16458800  |
| C | 0.00009700  | 5.00379800 | 3.60711500  |
| C | -1.23946500 | 5.39122000 | 3.00241300  |
| C | -2.47600500 | 5.00633100 | 3.60662100  |
| C | -3.71507600 | 5.38839100 | 2.99867900  |
| C | -4.95573700 | 5.00051600 | 3.60255000  |
| C | -4.95579600 | 4.03338900 | 4.65787500  |
| C | -6.19207500 | 3.46323600 | 5.08788900  |
| C | -6.19214100 | 2.19249500 | 5.74907500  |
| C | -3.71504900 | 5.93454600 | 1.67880800  |
| C | -2.47595500 | 6.09364400 | 0.97863400  |
| C | -1.23945000 | 5.93913700 | 1.67822400  |
| C | 0.00014200  | 6.09205100 | 0.97656000  |
| C | 1.23974700  | 5.93885200 | 1.67817700  |
| C | 1.23973600  | 5.39095300 | 3.00236100  |
| C | 2.47620400  | 5.00595700 | 3.60657700  |
| C | 2.47618600  | 4.03770900 | 4.66355200  |
| C | 0.00013000  | 6.15302800 | -0.45159400 |
| C | -1.23950900 | 6.06047700 | -1.16368400 |
| C | -2.47599200 | 6.15479400 | -0.45346400 |
| C | -3.71507600 | 6.05599200 | -1.16459800 |
| C | -4.95572600 | 6.14775600 | -0.45273200 |
| C | -4.95569700 | 6.08674100 | 0.97738200  |
| C | -6.19194100 | 5.92707400 | 1.67348400  |
| C | -6.19196900 | 5.37935000 | 2.99715400  |
| C | -3.71516800 | 5.62478400 | -2.52632500 |
| C | -2.47611100 | 5.29611300 | -3.16474500 |
| C | -1.23955400 | 5.62795900 | -2.52988400 |
| C | -0.00003600 | 5.29371100 | -3.16557900 |
| C | 1.23961700  | 5.62781400 | -2.52995200 |



|   |             |             |             |
|---|-------------|-------------|-------------|
| C | 1.23966600  | 6.06023200  | -1.16375600 |
| C | 2.47618500  | 6.15417500  | -0.45357200 |
| C | 2.47622300  | 6.09301400  | 0.97853100  |
| C | -0.00005100 | 4.42200700  | -4.29843600 |
| C | -1.23970600 | 3.89305400  | -4.78405600 |
| C | -2.47617300 | 4.42180200  | -4.30059800 |
| C | -3.71527700 | 3.88881800  | -4.78159000 |
| C | -4.95589100 | 4.41679900  | -4.29536500 |
| C | -4.95580200 | 5.29000100  | -3.16116900 |
| C | -6.19203500 | 5.61563000  | -2.52551600 |
| C | -6.19197300 | 6.04811000  | -1.15988100 |
| C | -3.71530200 | 2.68312200  | -5.54737400 |
| C | -2.47625500 | 2.02114600  | -5.82546800 |
| C | -1.23974800 | 2.68349200  | -5.55242100 |
| C | -0.00011500 | 2.01901400  | -5.82483600 |
| C | 1.23944400  | 2.68367100  | -5.55285500 |
| C | 1.23946500  | 3.89323300  | -4.78439700 |
| C | 2.47601700  | 4.42201900  | -4.30112200 |
| C | 2.47604900  | 5.29597000  | -3.16499200 |
| C | -4.95598100 | 2.01857000  | -5.81846000 |
| C | -6.19219400 | 2.67650800  | -5.54066900 |
| C | -6.19215600 | 3.88571900  | -4.77274800 |
| C | 2.47597500  | 2.02138700  | -5.82612000 |
| C | -0.00013900 | 0.62312700  | -6.13271100 |
| C | -1.23971100 | -0.09426700 | -6.16523300 |
| C | -2.47624000 | 0.62141100  | -6.13420200 |
| C | -3.71530700 | -0.09609700 | -6.16054300 |
| C | -4.95594200 | 0.62078500  | -6.12677400 |
| C | -3.71525100 | -1.51220100 | -5.97346200 |
| C | -2.47613800 | -2.19819500 | -5.76171800 |
| C | -1.23967400 | -1.51497300 | -5.97745600 |
| C | -0.00000900 | -2.19914100 | -5.75954800 |
| C | 1.23955300  | -1.51487100 | -5.97753100 |
| C | 1.23950300  | -0.09418100 | -6.16538400 |
| C | 2.47598000  | 0.62164000  | -6.13470800 |
| C | -2.47608700 | -3.46951600 | -5.09963400 |

|   |             |             |             |
|---|-------------|-------------|-------------|
| C | -1.23954300 | -4.03792300 | -4.66357000 |
| C | 0.00002000  | -3.46693500 | -5.09917700 |
| C | 1.23967300  | -4.03768100 | -4.66340800 |
| C | 2.47617000  | -3.46918100 | -5.09946800 |
| C | 2.47608600  | -2.19792700 | -5.76165900 |
| C | 3.71514700  | -1.51187600 | -5.97363500 |
| C | 3.71509800  | -0.09582900 | -6.16099100 |
| C | 4.95574000  | 0.62111800  | -6.12759700 |
| C | -6.19219600 | -0.09291800 | -6.15154700 |
| C | -6.19215300 | -1.51309000 | -5.96401900 |
| C | -4.95587800 | -2.19583800 | -5.75477400 |
| C | -4.95582700 | -3.46549600 | -5.09376100 |
| C | -3.71513500 | -4.03660200 | -4.65910200 |
| C | -3.71509400 | -5.00128500 | -3.60568000 |
| C | -2.47599800 | -5.39045600 | -3.00231300 |
| C | -1.23950500 | -5.00570100 | -3.60666700 |
| C | 3.71523700  | -4.03604800 | -4.65879400 |
| C | 4.95585500  | -3.46488300 | -5.09354600 |
| C | 4.95582300  | -2.19538200 | -5.75481700 |
| C | 6.19205100  | -1.51265900 | -5.96436200 |
| C | 6.19201200  | -0.09255800 | -6.15229500 |
| C | -7.43117100 | 0.62173000  | -6.11323500 |
| C | -8.67731300 | -0.09234000 | -6.16328600 |
| C | -8.67727200 | -1.51684100 | -5.97520100 |
| C | -7.43109000 | -2.19334300 | -5.74144500 |
| C | -7.43104100 | -3.45623600 | -5.08405600 |
| C | -6.19204300 | -4.02864200 | -4.65446400 |
| C | -6.19199800 | -4.99620100 | -3.59809600 |
| C | -4.95572300 | -5.38445200 | -2.99876100 |
| C | -2.47599100 | -5.93836700 | -1.67776700 |
| C | -3.71507600 | -6.08922100 | -0.97577500 |
| C | -4.95571300 | -5.93158300 | -1.67601800 |
| C | -8.67716200 | -4.03584400 | -4.66387500 |
| C | -8.67710800 | -5.00645100 | -3.60438800 |
| C | -7.43093700 | -5.37428500 | -2.99037200 |
| C | -7.43092000 | -5.91852600 | -1.67473800 |

|   |             |             |             |
|---|-------------|-------------|-------------|
| C | -6.19196500 | -6.08025800 | -0.97750800 |
| C | -6.19199600 | -6.14151600 | 0.45363800  |
| C | -4.95577500 | -6.05338000 | 1.16237200  |
| C | -3.71510500 | -6.15037500 | 0.45126600  |
| C | 6.19213000  | -4.02784200 | -4.65413900 |
| C | -7.43119300 | 2.01204400  | -5.80658500 |
| C | 4.95574000  | 2.01897300  | -5.81953000 |
| C | 3.71506900  | 2.68351100  | -5.54832400 |
| C | 3.71509900  | 3.88914000  | -4.78235600 |
| C | -8.67734500 | 2.68092800  | -5.55160700 |
| C | -8.67730400 | 3.89388700  | -4.78137800 |
| C | -7.43111000 | 4.40905700  | -4.28448700 |
| C | -7.43102500 | 5.27758900  | -3.15633700 |
| C | 6.19199600  | 2.67697800  | -5.54194700 |
| C | 6.19200800  | 3.88609700  | -4.77378000 |
| C | 4.95574700  | 4.41707300  | -4.29619800 |
| C | 4.95582100  | 5.28973700  | -3.16155600 |
| C | 3.71518500  | 5.62437400  | -2.52653400 |
| C | 3.71522300  | 6.05523800  | -1.16477500 |
| C | -8.67714200 | 5.62618200  | -2.53104300 |
| C | -8.67709900 | 6.05998500  | -1.16124300 |
| C | -7.43091900 | 6.13485800  | -0.44941300 |
| C | -7.43088900 | 6.07417400  | 0.97301900  |
| C | 6.19205300  | 5.61524000  | -2.52594600 |
| C | 6.19209800  | 6.04718300  | -1.16016300 |
| C | 4.95591000  | 6.14680500  | -0.45296100 |
| C | 4.95593900  | 6.08567000  | 0.97713900  |
| C | 3.71530200  | 5.93375600  | 1.67863900  |
| C | 3.71531600  | 5.38767700  | 2.99849700  |
| C | -8.67703200 | 5.93879700  | 1.67594300  |
| C | -8.67706100 | 5.38942200  | 3.00363500  |
| C | -7.43094200 | 4.98857100  | 3.59673200  |
| C | -7.43101400 | 4.02662800  | 4.64639000  |
| C | 6.19217100  | 5.92596300  | 1.67319000  |
| C | 6.19217600  | 5.37840200  | 2.99691100  |
| C | 4.95596200  | 4.99983200  | 3.60242800  |

|   |             |             |             |
|---|-------------|-------------|-------------|
| C | 4.95590300  | 4.03299800  | 4.65801500  |
| C | 3.71524800  | 3.46534800  | 5.09714800  |
| C | 3.71519000  | 2.19835300  | 5.75669200  |
| C | -8.67720900 | 3.47067900  | 5.09719700  |
| C | -8.67727000 | 2.19605500  | 5.76039800  |
| C | -7.43114300 | 1.50775400  | 5.95711000  |
| C | -7.43118200 | 0.09626900  | 6.14361100  |
| C | 6.19214600  | 3.46284000  | 5.08814300  |
| C | 6.19211100  | 2.19224900  | 5.74968100  |
| C | 4.95582000  | 1.51301500  | 5.97001400  |
| C | 4.95578200  | 0.09393600  | 6.15756300  |
| C | 3.71510900  | -0.62319500 | 6.12972200  |
| C | 3.71509800  | -2.01806900 | 5.82237200  |
| C | -8.67734600 | -0.61943300 | 6.13249700  |
| C | -8.67736000 | -2.02263200 | 5.82340200  |
| C | -7.43119500 | -2.67677300 | 5.53275600  |
| C | -7.43115400 | -3.87877700 | 4.76970400  |
| C | -6.19216600 | -4.41232700 | 4.29270300  |
| C | -6.19210600 | -5.28604600 | 3.15749100  |
| C | -4.95583000 | -5.62166800 | 2.52714900  |
| C | 6.19202100  | -0.61929500 | 6.12144500  |
| C | 6.19201200  | -2.01820000 | 5.81326600  |
| C | 4.95575700  | -2.68058000 | 5.54628900  |
| C | -8.67728300 | -4.42018900 | 4.30137800  |
| C | -8.67720700 | -5.29658400 | 3.16272400  |
| C | -7.43102900 | -5.61058900 | 2.51949700  |
| C | -7.43098500 | -6.04005800 | 1.16207400  |
| C | -8.67710900 | -6.15345000 | 0.45525800  |
| C | -8.67707100 | -6.09204600 | -0.98025900 |
| C | -9.91213000 | -3.50993300 | -5.15517100 |
| C | -9.91219100 | -2.22102100 | -5.82610300 |
| C | -9.91203700 | -5.45004500 | -3.03754800 |
| C | -9.91200700 | -6.00559700 | -1.69483100 |
| C | -9.91230700 | 2.04524600  | -5.88911100 |
| C | -9.91229300 | 0.62629600  | -6.20212400 |
| C | -9.91201500 | 6.22340600  | -0.46024200 |

|   |              |             |             |
|---|--------------|-------------|-------------|
| C | -9.91198100  | 6.16145500  | 0.99151100  |
| C | -9.91212700  | 5.35624300  | -3.19818700 |
| C | -9.91222900  | 4.46979000  | -4.34957200 |
| C | -9.91212800  | -5.68989200 | 2.55988200  |
| C | -9.91208500  | -6.12839400 | 1.17452000  |
| C | -9.91226800  | -3.93818300 | 4.83577200  |
| C | -9.91231900  | -2.71142500 | 5.61455000  |
| C | -9.91225500  | 1.53386500  | 6.04220900  |
| C | -9.91228700  | 0.09330800  | 6.23257200  |
| C | -9.91211900  | 4.08157100  | 4.71642800  |
| C | -9.91202900  | 5.06338800  | 3.64521600  |
| C | 7.43108500   | -3.45548600 | -5.08390900 |
| C | 7.43104100   | -2.19278800 | -5.74164000 |
| C | 7.43097900   | -2.67703000 | 5.53361300  |
| C | 7.43112700   | 4.02598400  | 4.64645700  |
| C | 7.43114300   | 4.98762300  | 3.59651500  |
| C | 7.43105600   | 1.50744700  | 5.95784300  |
| C | 7.43101600   | 0.09597900  | 6.14449300  |
| C | 7.43097300   | 0.62213300  | -6.11433500 |
| C | 7.43096900   | 2.01251100  | -5.80792700 |
| C | 7.43100500   | 5.27738100  | -3.15694800 |
| C | 7.43098100   | 4.40933900  | -4.28548500 |
| C | 7.43108100   | 6.13378200  | -0.44974400 |
| C | 7.43110300   | 6.07291500  | 0.97266000  |
| C | -11.10922500 | -6.25650600 | -0.96073400 |
| C | -11.10926800 | -6.31564800 | 0.42159200  |
| C | -11.10928200 | -5.10891000 | -3.73427700 |
| C | -11.10931900 | -4.17430300 | -4.75448800 |
| C | -11.10943200 | -5.40953600 | 3.28314400  |
| C | -11.10950300 | -4.56560900 | 4.37952600  |
| C | -11.10951800 | -0.14023400 | -6.32154400 |
| C | -11.10947400 | -1.51189500 | -6.14044900 |
| C | -11.10952000 | 3.95880500  | -4.93316200 |
| C | -11.10954400 | 2.79082200  | -5.67482500 |
| C | -11.10932200 | 5.78987300  | -2.55481300 |
| C | -11.10928700 | 6.20759800  | -1.23579500 |

|   |              |             |             |
|---|--------------|-------------|-------------|
| C | -11.10961100 | -2.03164500 | 5.98814100  |
| C | -11.10958700 | -0.68049500 | 6.28587900  |
| C | -11.10948900 | 2.29506300  | 5.89262700  |
| C | -11.10944200 | 3.52241200  | 5.25394300  |
| C | -11.10923600 | 5.55055800  | 3.04143600  |
| C | -11.10921500 | 6.07959000  | 1.76297800  |
| C | 8.67726900   | 5.93742500  | 1.67552300  |
| C | 8.67728700   | 5.38820900  | 3.00328600  |
| C | 8.67722000   | 6.05900200  | -1.16165700 |
| C | 8.67716700   | 5.62575300  | -2.53163700 |
| C | 8.67727100   | 3.47001800  | 5.09738500  |
| C | 8.67724200   | 2.19561200  | 5.76101000  |
| C | 8.67712200   | 2.68142200  | -5.55303100 |
| C | 8.67712400   | 3.89425400  | -4.78258000 |
| C | 8.67717000   | -1.51632900 | -5.97575100 |
| C | 8.67713100   | -0.09189900 | -6.16432200 |
| C | 8.67726500   | -4.03490200 | -4.66363600 |
| C | 8.67714000   | -0.61979100 | 6.13355100  |
| C | 8.67713700   | -2.02298400 | 5.82447800  |
| C | 9.91218600   | -3.50902300 | -5.15510600 |
| C | 9.91214000   | -2.22037900 | -5.82652900 |
| C | 9.91208400   | -2.71183800 | 5.61582200  |
| C | 9.91224400   | 4.08064000  | 4.71639700  |
| C | 9.91224100   | 5.06210600  | 3.64486600  |
| C | 9.91215900   | 1.53340000  | 6.04305800  |
| C | 9.91209900   | 0.09287700  | 6.23374900  |
| C | 9.91206000   | 0.62678700  | -6.20351900 |
| C | 9.91205400   | 2.04579900  | -5.89070400 |
| C | 9.91208700   | 5.35601900  | -3.19898200 |
| C | 9.91208300   | 4.47003900  | -4.35074400 |
| C | 9.91220500   | 6.22211100  | -0.46070000 |
| C | 9.91222900   | 6.15988900  | 0.99102400  |
| C | 11.10950700  | 6.07769900  | 1.76238300  |
| C | 11.10951500  | 5.54884000  | 3.04088300  |
| C | 11.10942700  | 6.20645100  | -1.23634700 |
| C | 11.10936100  | 5.78926900  | -2.55552700 |

|   |              |             |             |
|---|--------------|-------------|-------------|
| C | 11.10950900  | 3.52153500  | 5.25411700  |
| C | 11.10946800  | 2.29441800  | 5.89324400  |
| C | 11.10929200  | 2.79142100  | -5.67657800 |
| C | 11.10930900  | 3.95928300  | -4.93468700 |
| C | 11.10934200  | -1.51130800 | -6.14136200 |
| C | 11.10930200  | -0.13969900 | -6.32296400 |
| C | 11.10944800  | -4.17309200 | -4.75417400 |
| C | 11.10948000  | -5.10746600 | -3.73377200 |
| C | 11.10933500  | -0.68100800 | 6.28747200  |
| C | 11.10934200  | -2.03218500 | 5.98976000  |
| H | -12.06347100 | 6.43823100  | -0.76493800 |
| H | -12.06351500 | 5.70742500  | -3.07258800 |
| H | -12.06338700 | 6.34976100  | 1.31361100  |
| H | -12.06373100 | 4.43801000  | -4.72066300 |
| H | -12.06370800 | 1.87095100  | 6.20076300  |
| H | -12.06359400 | 4.01822500  | 5.08330700  |
| H | -12.06375500 | -0.19072800 | 6.47308400  |
| H | -12.06340300 | 5.42408900  | 3.55032500  |
| H | -12.06358100 | -5.78730900 | 2.91948900  |
| H | -12.06372700 | -4.31068200 | 4.83761800  |
| H | -12.06347500 | -6.41561400 | 0.93621800  |
| H | -12.06380800 | -2.55466800 | 5.95210000  |
| H | -12.06378100 | 2.39469200  | -6.01813200 |
| H | -12.06373400 | 0.36356000  | -6.46644200 |
| H | -12.06352100 | -3.88152400 | -5.18938800 |
| H | -12.06345600 | -5.51653000 | -3.40455200 |
| H | -12.06362300 | -2.03617200 | -6.14963900 |
| H | -12.06336200 | -6.31210100 | -1.48218000 |
| H | 12.06371500  | -5.51475300 | -3.40383300 |
| H | 12.06364100  | -3.88017500 | -5.18899700 |
| H | 12.06367200  | -6.31005400 | -1.48156600 |
| H | 12.06351500  | -2.03553300 | -6.15060900 |
| H | 12.06351700  | -4.31115600 | 4.83900200  |
| H | 12.06353600  | -5.78722700 | 2.92041100  |
| H | 12.06348700  | -2.55533900 | 5.95413300  |
| H | 12.06368000  | -6.41411200 | 0.93675100  |

|   |             |             |             |
|---|-------------|-------------|-------------|
| H | 12.06371900 | 4.01716900  | 5.08332100  |
| H | 12.06363800 | 1.87034200  | 6.20158700  |
| H | 12.06371700 | 5.42203900  | 3.54961000  |
| H | 12.06346600 | -0.19131700 | 6.47508300  |
| H | 12.06343800 | 0.36412300  | -6.46834400 |
| H | 12.06346600 | 2.39550600  | -6.02032300 |
| H | 12.06350700 | 5.70691200  | -3.07340700 |
| H | 12.06368700 | 6.43670900  | -0.76548200 |
| H | 12.06351500 | 4.43860200  | -4.72241300 |
| H | 12.06374000 | 6.34737500  | 1.31286600  |

**(10,10) tube**

|   |              |             |            |
|---|--------------|-------------|------------|
| C | -11.10907100 | 2.54770700  | 6.54186300 |
| C | -9.91222300  | 1.78736000  | 6.69190700 |
| C | -8.67734800  | 2.44619700  | 6.40102700 |
| C | -8.67732200  | 3.72726300  | 5.75024300 |
| C | -9.91213700  | 4.35075600  | 5.38970200 |
| C | -11.10903900 | 3.78124100  | 5.91520700 |
| C | -7.43150100  | 1.75796100  | 6.59909300 |
| C | -6.19255400  | 2.44005200  | 6.38358700 |
| C | -6.19254500  | 3.71674900  | 5.73500400 |
| C | -7.43145100  | 4.29298400  | 5.31115500 |
| C | -4.95601100  | 1.76297000  | 6.60890800 |
| C | -3.71532300  | 2.44646700  | 6.39184300 |
| C | -3.71531000  | 3.71960900  | 5.74508800 |
| C | -4.95597100  | 4.29790900  | 5.32097300 |
| C | -2.47626600  | 1.76537400  | 6.61752200 |
| C | -1.23954600  | 2.44682600  | 6.39763700 |
| C | -1.23952900  | 3.72405000  | 5.74880400 |
| C | -2.47624400  | 4.30339900  | 5.32797700 |
| C | -4.95602100  | 0.34953500  | 6.83097400 |
| C | -3.71534500  | -0.36759600 | 6.83412000 |
| C | -2.47628800  | 0.34985500  | 6.83990600 |
| C | -6.19258400  | -0.36399700 | 6.82425300 |
| C | -6.19257200  | -1.77809900 | 6.59842200 |
| C | -4.95602400  | -2.45823000 | 6.38257700 |



|   |              |             |            |
|---|--------------|-------------|------------|
| C | -3.71534600  | -1.77776000 | 6.60891600 |
| C | -7.43150600  | 0.35132900  | 6.82011200 |
| C | -8.67737500  | -0.36447000 | 6.84270300 |
| C | -8.67734600  | -1.78340900 | 6.61614500 |
| C | -7.43149800  | -2.45655800 | 6.37173200 |
| C | -9.91222800  | 0.35180600  | 6.91746200 |
| C | -11.10912000 | -0.41789500 | 7.00775600 |
| C | -11.10908500 | -1.78415800 | 6.78961300 |
| C | -9.91217200  | -2.48741500 | 6.46419000 |
| C | -7.43148400  | -3.72448500 | 5.72380900 |
| C | -8.67732400  | -4.31693800 | 5.32143500 |
| C | -9.91214400  | -3.78143900 | 5.80302600 |
| C | -6.19256600  | -4.30560300 | 5.30669500 |
| C | -4.95601800  | -3.73230400 | 5.73155900 |
| C | -3.71535200  | -4.31429000 | 5.31254500 |
| C | -2.47629400  | -3.73731000 | 5.73903600 |
| C | -2.47630400  | -2.46135300 | 6.39099900 |
| C | -1.23957300  | -1.78088200 | 6.61390600 |
| C | -1.23956900  | -0.36621000 | 6.83980800 |
| C | -1.23958900  | -4.31648500 | 5.31798100 |
| C | -0.00003300  | -3.73557900 | 5.73953300 |
| C | -0.00002600  | -2.46278800 | 6.38987400 |
| C | 1.23953100   | -1.78090800 | 6.61392500 |
| C | 1.23954500   | -0.36623100 | 6.83981200 |
| C | 0.00000000   | 0.35154400  | 6.83925500 |
| C | 0.00001200   | 1.76352600  | 6.61739200 |
| C | 0.00003400   | 4.30431600  | 5.32638900 |
| C | 1.23958400   | 3.72402800  | 5.74878100 |
| C | 1.23958600   | 2.44680000  | 6.39762000 |
| C | 2.47628600   | 1.76532700  | 6.61750000 |
| C | 2.47628600   | 0.34981400  | 6.83991600 |
| C | 3.71536500   | 2.44639100  | 6.39179000 |
| C | 3.71536700   | 3.71953000  | 5.74502000 |
| C | 2.47631000   | 4.30331800  | 5.32789400 |
| C | 2.47631000   | 5.31774900  | 4.31595800 |
| C | 1.23959100   | 5.73987200  | 3.73755800 |

|   |             |            |             |
|---|-------------|------------|-------------|
| C | 0.00003200  | 5.31620900 | 4.31692700  |
| C | -1.23952000 | 5.73991300 | 3.73759200  |
| C | -2.47624200 | 5.31778700 | 4.31599500  |
| C | 4.95603600  | 4.29776600 | 5.32083600  |
| C | 4.95604200  | 5.31069400 | 4.31037800  |
| C | 3.71536800  | 5.73614100 | 3.73306300  |
| C | 3.71536000  | 6.38596800 | 2.46147600  |
| C | 2.47629100  | 6.61318500 | 1.78092300  |
| C | 1.23959000  | 6.39180300 | 2.46189500  |
| C | 0.00001500  | 6.61307400 | 1.77911900  |
| C | -1.23953300 | 6.39182300 | 2.46191500  |
| C | 0.00001800  | 6.83850200 | 0.36770100  |
| C | 1.23955600  | 6.84076500 | -0.35005000 |
| C | 2.47628500  | 6.83913700 | 0.36598000  |
| C | 3.71533100  | 6.83511500 | -0.35151400 |
| C | 4.95601400  | 6.83018800 | 0.36559200  |
| C | 4.95602900  | 6.60456700 | 1.77846200  |
| C | 6.19258100  | 6.37768200 | 2.45497100  |
| C | 6.19260300  | 5.72601300 | 3.73011800  |
| C | 3.71531100  | 6.61343600 | -1.76222600 |
| C | 2.47624600  | 6.39713500 | -2.44633900 |
| C | 1.23954100  | 6.61835400 | -1.76530100 |
| C | -0.00001500 | 6.39593800 | -2.44771100 |
| C | -1.23957400 | 6.61837000 | -1.76526800 |
| C | -1.23956500 | 6.84079100 | -0.35004100 |
| C | -2.47626500 | 6.83921500 | 0.36602600  |
| C | -2.47625200 | 6.61323700 | 1.78097400  |
| C | -0.00003600 | 5.74848500 | -3.72195700 |
| C | 1.23952000  | 5.32838700 | -4.30391700 |
| C | 2.47623000  | 5.74808800 | -3.72377300 |
| C | 3.71527600  | 5.32300900 | -4.30180000 |
| C | 4.95595400  | 5.74069600 | -3.71885700 |
| C | 4.95597000  | 6.38876700 | -2.44329200 |
| C | 6.19253200  | 6.60296100 | -1.76263400 |
| C | 6.19254900  | 6.82523800 | -0.34796900 |
| C | 3.71528300  | 4.31445900 | -5.31274200 |

|   |             |             |             |
|---|-------------|-------------|-------------|
| C | 2.47622000  | 3.73734800  | -5.73908300 |
| C | 1.23951500  | 4.31659800  | -5.31811200 |
| C | -0.00003600 | 3.73554300  | -5.73948600 |
| C | -1.23960100 | 4.31654300  | -5.31805500 |
| C | -1.23959000 | 5.32835000  | -4.30387500 |
| C | -2.47629500 | 5.74801000  | -3.72369100 |
| C | -2.47629400 | 6.39710400  | -2.44629000 |
| C | -0.00002600 | 2.46283200  | -6.38996700 |
| C | 1.23953300  | 1.78090500  | -6.61387600 |
| C | 2.47623300  | 2.46145700  | -6.39115100 |
| C | 3.71531300  | 1.77782800  | -6.60895600 |
| C | 4.95596200  | 2.45836600  | -6.38276000 |
| C | 4.95594600  | 3.73241000  | -5.73167100 |
| C | 6.19249000  | 4.30579500  | -5.30691500 |
| C | 6.19249200  | 5.31718800  | -4.29315800 |
| C | 3.71532400  | 0.36768000  | -6.83415100 |
| C | 2.47628200  | -0.34980500 | -6.83986600 |
| C | 1.23955000  | 0.36623200  | -6.83983800 |
| C | 0.00000400  | -0.35153100 | -6.83916500 |
| C | -1.23956900 | 0.36621200  | -6.83984000 |
| C | -1.23958500 | 1.78086600  | -6.61381200 |
| C | -2.47630100 | 2.46138600  | -6.39109300 |
| C | -2.47630200 | 3.73728500  | -5.73898700 |
| C | 0.00001600  | -1.76353200 | -6.61739300 |
| C | 1.23958600  | -2.44679800 | -6.39760700 |
| C | 2.47629300  | -1.76531900 | -6.61748300 |
| C | 3.71536600  | -2.44638000 | -6.39176200 |
| C | 4.95603500  | -1.76286300 | -6.60883400 |
| C | 4.95602200  | -0.34943400 | -6.83093300 |
| C | 6.19255800  | 0.36411700  | -6.82427900 |
| C | 6.19253300  | 1.77821900  | -6.59849600 |
| C | 3.71537300  | -3.71951300 | -5.74497900 |
| C | 2.47631000  | -4.30332900 | -5.32789700 |
| C | 1.23959400  | -3.72402500 | -5.74876200 |
| C | 0.00003500  | -4.30434000 | -5.32638900 |
| C | -1.23953100 | -3.72405400 | -5.74878600 |

|   |             |             |             |
|---|-------------|-------------|-------------|
| C | -1.23954100 | -2.44682000 | -6.39761300 |
| C | -2.47626700 | -1.76537500 | -6.61752300 |
| C | -2.47627600 | -0.34985100 | -6.83982200 |
| C | 0.00003600  | -5.31621300 | -4.31692600 |
| C | 1.23959100  | -5.73991100 | -3.73757000 |
| C | 2.47631100  | -5.31772400 | -4.31592100 |
| C | 3.71536800  | -5.73613900 | -3.73305500 |
| C | 4.95604900  | -5.31066200 | -4.31033200 |
| C | 4.95604900  | -4.29775600 | -5.32082500 |
| C | 6.19260400  | -3.71658400 | -5.73484800 |
| C | 6.19259900  | -2.43990400 | -6.38347600 |
| C | 3.71536300  | -6.38598200 | -2.46147300 |
| C | 2.47629300  | -6.61323900 | -1.78093300 |
| C | 1.23958700  | -6.39184000 | -2.46190600 |
| C | 0.00001900  | -6.61314600 | -1.77913800 |
| C | -1.23953300 | -6.39186800 | -2.46193300 |
| C | -1.23952800 | -5.73994500 | -3.73759900 |
| C | -2.47624100 | -5.31779100 | -4.31597800 |
| C | -2.47624300 | -4.30339500 | -5.32796000 |
| C | 0.00000800  | -6.83852700 | -0.36770900 |
| C | 1.23955800  | -6.84079600 | 0.35005200  |
| C | 2.47628100  | -6.83918700 | -0.36599000 |
| C | 3.71533300  | -6.83514000 | 0.35151100  |
| C | 4.95601400  | -6.83023300 | -0.36559900 |
| C | 4.95602800  | -6.60461200 | -1.77846700 |
| C | 6.19259100  | -6.37770200 | -2.45497300 |
| C | 6.19259700  | -5.72602900 | -3.73011400 |
| C | 3.71531300  | -6.61343700 | 1.76221500  |
| C | 2.47624700  | -6.39714300 | 2.44633000  |
| C | 1.23954300  | -6.61836300 | 1.76528200  |
| C | -0.00002100 | -6.39595900 | 2.44770700  |
| C | -1.23957000 | -6.61835100 | 1.76525700  |
| C | -1.23956000 | -6.84079400 | 0.35003100  |
| C | -2.47626600 | -6.83921200 | -0.36603300 |
| C | -2.47625600 | -6.61328000 | -1.78098000 |
| C | 2.47623500  | -5.74805200 | 3.72373600  |

|   |             |             |             |
|---|-------------|-------------|-------------|
| C | 1.23952100  | -5.32843000 | 4.30394000  |
| C | -0.00002800 | -5.74846000 | 3.72192900  |
| C | -1.23958700 | -5.32840200 | 4.30390900  |
| C | -2.47629200 | -5.74799300 | 3.72367200  |
| C | -2.47629000 | -6.39710600 | 2.44627700  |
| C | -3.71533900 | -6.61340200 | 1.76214400  |
| C | -3.71533400 | -6.83513700 | 0.35144500  |
| C | -3.71530200 | -5.73624500 | -3.73314500 |
| C | -3.71530800 | -6.38606900 | -2.46155200 |
| C | -4.95599000 | -6.60469700 | -1.77856100 |
| C | -4.95598000 | -6.83027600 | -0.36568800 |
| C | 6.19255600  | -6.82527700 | 0.34796600  |
| C | 6.19253100  | -6.60297600 | 1.76262300  |
| C | 4.95597600  | -6.38876600 | 2.44327400  |
| C | 4.95595900  | -5.74066400 | 3.71882500  |
| C | 3.71528700  | -5.32303500 | 4.30179800  |
| C | 3.71528400  | -4.31439100 | 5.31265700  |
| C | 2.47622700  | -3.73736600 | 5.73909600  |
| C | 1.23952100  | -4.31651800 | 5.31802000  |
| C | -3.71535200 | -5.32295200 | 4.30170300  |
| C | -4.95601700 | -5.74055000 | 3.71869800  |
| C | -4.95602000 | -6.38868900 | 2.44316700  |
| C | -6.19256200 | -6.60291600 | 1.76250200  |
| C | -6.19255900 | -6.82528200 | 0.34785400  |
| C | 7.43150600  | -6.59484600 | -1.77338400 |
| C | 7.43149500  | -6.81937300 | -0.36731300 |
| C | 8.67733900  | -6.84378800 | 0.34844300  |
| C | 8.67731600  | -6.62075900 | 1.76793900  |
| C | 7.43144500  | -6.37792900 | 2.44165100  |
| C | 7.43142400  | -5.73297700 | 3.71107800  |
| C | 6.19250000  | -5.31719000 | 4.29314500  |
| C | 6.19249500  | -4.30575700 | 5.30686700  |
| C | 4.95595200  | -3.73241400 | 5.73167800  |
| C | 2.47625000  | -2.46140300 | 6.39105000  |
| C | 3.71530400  | -1.77783000 | 6.60897600  |
| C | 4.95597100  | -2.45833200 | 6.38268700  |

|   |             |             |             |
|---|-------------|-------------|-------------|
| C | 8.67726600  | -5.33201700 | 4.30446000  |
| C | 8.67725200  | -4.31713200 | 5.32165500  |
| C | 7.43141700  | -3.72464300 | 5.72398000  |
| C | 7.43143900  | -2.45670800 | 6.37188400  |
| C | 6.19252800  | -1.77821600 | 6.59851100  |
| C | 6.19256100  | -0.36410300 | 6.82428000  |
| C | 4.95601800  | 0.34944900  | 6.83097800  |
| C | 3.71532200  | -0.36766300 | 6.83413900  |
| C | -6.19256800 | -5.31705600 | 4.29299100  |
| C | 8.67736900  | -6.39516400 | -2.46111300 |
| C | 8.67736900  | -5.74124900 | -3.74060100 |
| C | 7.43152800  | -5.30080800 | -4.30533600 |
| C | 7.43153200  | -4.29278700 | -5.31097100 |
| C | -6.19253600 | -6.37783300 | -2.45510100 |
| C | -6.19252600 | -5.72619900 | -3.73026200 |
| C | -4.95597500 | -5.31079500 | -4.31044700 |
| C | -4.95597900 | -4.29789700 | -5.32095000 |
| C | -3.71530800 | -3.71960300 | -5.74505100 |
| C | -3.71532100 | -2.44645600 | -6.39180900 |
| C | 8.67739000  | -3.72702500 | -5.75006000 |
| C | 8.67739100  | -2.44599600 | -6.40092000 |
| C | 7.43152600  | -1.75779600 | -6.59901000 |
| C | 7.43150900  | -0.35118100 | -6.82008800 |
| C | -6.19253400 | -3.71673800 | -5.73496600 |
| C | -6.19255100 | -2.44003700 | -6.38356500 |
| C | -4.95600800 | -1.76296700 | -6.60888400 |
| C | -4.95601800 | -0.34952700 | -6.83091200 |
| C | -3.71534900 | 0.36761000  | -6.83415600 |
| C | -3.71534900 | 1.77774300  | -6.60887200 |
| C | 8.67735300  | 0.36464500  | -6.84276600 |
| C | 8.67730300  | 1.78359600  | -6.61629500 |
| C | 7.43143500  | 2.45673400  | -6.37192600 |
| C | 7.43141400  | 3.72465800  | -5.72399900 |
| C | -6.19257400 | 0.36399600  | -6.82425900 |
| C | -6.19258100 | 1.77810200  | -6.59843500 |
| C | -4.95603200 | 2.45827200  | -6.38266700 |

|   |             |            |             |
|---|-------------|------------|-------------|
| C | -4.95602900 | 3.73229700 | -5.73156400 |
| C | -3.71535600 | 4.31433200 | -5.31259600 |
| C | -3.71535900 | 5.32291500 | -4.30168400 |
| C | 8.67724500  | 4.31715500 | -5.32168500 |
| C | 8.67725800  | 5.33203300 | -4.30448400 |
| C | 7.43142100  | 5.73298500 | -3.71109600 |
| C | 7.43143800  | 6.37792600 | -2.44166100 |
| C | -6.19258200 | 4.30562500 | -5.30672400 |
| C | -6.19257500 | 5.31705400 | -4.29299500 |
| C | -4.95602200 | 5.74054000 | -3.71870200 |
| C | -4.95603100 | 6.38868700 | -2.44317100 |
| C | -3.71533400 | 6.61341500 | -1.76215300 |
| C | -3.71532500 | 6.83514300 | -0.35145400 |
| C | 8.67732000  | 6.62073900 | -1.76794600 |
| C | 8.67733800  | 6.84375300 | -0.34844700 |
| C | 7.43149600  | 6.81933200 | 0.36730700  |
| C | 7.43150900  | 6.59478800 | 1.77337300  |
| C | -6.19255700 | 6.60290600 | -1.76251300 |
| C | -6.19254800 | 6.82527000 | -0.34784600 |
| C | -4.95599900 | 6.83024100 | 0.36568000  |
| C | -4.95597700 | 6.60465800 | 1.77855800  |
| C | -3.71530000 | 6.38601500 | 2.46153300  |
| C | -3.71529400 | 5.73625400 | 3.73316600  |
| C | 8.67736300  | 6.39513900 | 2.46111000  |
| C | 8.67737100  | 5.74123100 | 3.74060600  |
| C | 7.43151700  | 5.30082100 | 4.30535300  |
| C | 7.43152400  | 4.29279000 | 5.31099000  |
| C | 6.19260000  | 3.71660000 | 5.73488700  |
| C | 6.19259300  | 2.43993100 | 6.38351300  |
| C | 4.95602500  | 1.76287800 | 6.60887500  |
| C | -6.19251700 | 6.37777800 | 2.45508600  |
| C | -6.19252700 | 5.72618800 | 3.73027400  |
| C | -4.95596300 | 5.31078900 | 4.31046700  |
| C | 8.67737700  | 3.72704300 | 5.75009100  |
| C | 8.67738000  | 2.44601500 | 6.40095300  |
| C | 7.43151900  | 1.75781700 | 6.59904500  |

|   |             |             |             |
|---|-------------|-------------|-------------|
| C | 7.43149800  | 0.35119300  | 6.82012200  |
| C | 8.67735300  | -0.36462600 | 6.84276600  |
| C | 8.67730300  | -1.78357800 | 6.61628100  |
| C | 9.91210800  | -5.81240700 | 3.76789200  |
| C | 9.91212700  | -6.47056300 | 2.47234500  |
| C | 9.91207300  | -3.78165800 | 5.80327200  |
| C | 9.91210600  | -2.48761400 | 6.46437400  |
| C | 9.91221200  | -5.37922900 | -4.36317900 |
| C | 9.91222200  | -4.35046300 | -5.38947800 |
| C | 9.91220300  | -6.68767000 | -1.80298100 |
| C | 9.91219800  | -6.91687100 | -0.36801700 |
| C | 9.91210400  | 2.48763900  | -6.46441000 |
| C | 9.91206900  | 3.78167900  | -5.80330500 |
| C | 9.91222400  | -0.35160800 | -6.91751000 |
| C | 9.91223900  | -1.78713200 | -6.69181800 |
| C | 9.91223700  | 1.78715800  | 6.69185800  |
| C | 9.91221900  | 0.35162500  | 6.91751700  |
| C | 9.91221500  | 4.35048400  | 5.38951500  |
| C | 9.91220300  | 5.37923700  | 4.36319800  |
| C | 9.91219900  | 6.91683000  | 0.36801500  |
| C | 9.91220200  | 6.68763600  | 1.80297900  |
| C | 9.91212200  | 6.47055300  | -2.47235300 |
| C | 9.91210600  | 5.81241400  | -3.76791000 |
| C | -7.43148500 | -5.73282500 | 3.71089800  |
| C | -7.43149300 | -6.37781900 | 2.44149000  |
| C | -7.43143000 | 5.30101100  | 4.30551300  |
| C | -7.43149600 | 6.37782300  | -2.44149300 |
| C | -7.43149800 | 5.73281000  | -3.71088600 |
| C | -7.43146300 | 6.81940700  | 0.36745700  |
| C | -7.43144400 | 6.59494100  | 1.77353200  |
| C | -7.43146700 | -6.59496000 | -1.77353200 |
| C | -7.43147800 | -6.81942600 | -0.36745100 |
| C | -7.43144600 | -5.30100600 | -4.30551100 |
| C | -7.43144900 | -4.29299000 | -5.31114900 |
| C | -7.43149900 | -0.35133000 | -6.82009400 |
| C | -7.43148700 | -1.75795600 | -6.59907700 |



|   |             |             |             |
|---|-------------|-------------|-------------|
| C | -7.43149700 | 2.45657000  | -6.37176900 |
| C | -7.43149100 | 3.72449100  | -5.72383400 |
| C | 11.10904200 | -1.78436500 | 6.78979200  |
| C | 11.10909900 | -0.41810300 | 7.00789300  |
| C | 11.10891400 | -4.45776400 | 5.42433500  |
| C | 11.10893500 | -5.43497300 | 4.44488800  |
| C | 11.10910400 | 2.54746000  | 6.54176300  |
| C | 11.10909400 | 3.78097300  | 5.91506100  |
| C | 11.10903800 | -7.00933200 | 0.40151000  |
| C | 11.10900800 | -6.79457100 | 1.76830700  |
| C | 11.10909800 | -6.53579700 | -2.56291500 |
| C | 11.10909800 | -5.90617800 | -3.79492400 |
| C | 11.10912200 | -2.54742100 | -6.54168900 |
| C | 11.10911500 | -3.78092800 | -5.91499800 |
| C | 11.10909900 | 0.41812800  | -7.00793100 |
| C | 11.10903500 | 1.78439300  | -6.78985100 |
| C | 11.10909100 | 5.90618300  | 3.79494300  |
| C | 11.10909400 | 6.53578700  | 2.56292600  |
| C | 11.10904300 | 7.00927800  | -0.40151200 |
| C | 11.10900900 | 6.79453100  | -1.76831000 |
| C | 11.10892700 | 5.43498900  | -4.44491100 |
| C | 11.10890600 | 4.45778000  | -5.42436200 |
| C | -8.67734800 | 4.31691400  | -5.32140700 |
| C | -8.67734900 | 5.33180000  | -4.30423300 |
| C | -8.67735700 | 1.78339200  | -6.61616600 |
| C | -8.67735800 | 0.36445900  | -6.84272800 |
| C | -8.67735000 | 6.62067400  | -1.76773200 |
| C | -8.67732600 | 6.84381700  | -0.34825700 |
| C | -8.67731300 | -3.72725900 | -5.75025400 |
| C | -8.67733600 | -2.44620200 | -6.40105900 |
| C | -8.67729400 | -5.74147100 | -3.74081700 |
| C | -8.67731300 | -6.39532900 | -2.46130100 |
| C | -8.67734900 | -6.62066900 | 1.76775700  |
| C | -8.67734100 | -6.84379000 | 0.34827600  |
| C | -8.67733400 | -5.33183200 | 4.30424700  |
| C | -8.67729100 | 6.39535600  | 2.46131100  |

|   |              |             |             |
|---|--------------|-------------|-------------|
| C | -8.67728400  | 5.74148800  | 3.74081900  |
| C | -9.91217200  | -5.81219600 | 3.76764800  |
| C | -9.91218100  | -6.47042400 | 2.47212600  |
| C | -9.91211000  | 5.37958700  | 4.36346200  |
| C | -9.91219000  | 6.47044500  | -2.47208300 |
| C | -9.91220000  | 5.81212400  | -3.76757600 |
| C | -9.91215600  | 6.91697700  | 0.36824200  |
| C | -9.91212800  | 6.68794400  | 1.80324100  |
| C | -9.91216500  | -6.68784200 | -1.80320200 |
| C | -9.91218000  | -6.91689900 | -0.36821300 |
| C | -9.91212200  | -5.37951000 | -4.36344800 |
| C | -9.91212800  | -4.35075900 | -5.38975800 |
| C | -9.91220900  | -0.35183300 | -6.91752700 |
| C | -9.91219400  | -1.78738800 | -6.69199600 |
| C | -9.91218100  | 2.48737300  | -6.46422100 |
| C | -9.91217000  | 3.78137400  | -5.80297200 |
| C | -11.10902600 | 4.45726400  | -5.42382200 |
| C | -11.10904100 | 5.43448700  | -4.44436200 |
| C | -11.10907600 | 1.78412400  | -6.78973800 |
| C | -11.10910000 | 0.41785800  | -7.00788000 |
| C | -11.10902700 | 6.79455700  | -1.76803600 |
| C | -11.10901800 | 7.00938100  | -0.40124100 |
| C | -11.10901500 | -3.78130800 | -5.91541100 |
| C | -11.10904400 | -2.54778800 | -6.54207000 |
| C | -11.10901100 | -5.90652300 | -3.79524300 |
| C | -11.10903100 | -6.53611000 | -2.56321800 |
| C | -11.10904400 | -6.79443700 | 1.76807500  |
| C | -11.10904300 | -7.00925100 | 0.40128400  |
| C | -11.10900800 | -5.43468300 | 4.44456200  |
| C | -11.10899000 | -4.45747100 | 5.42401200  |
| C | -11.10898500 | 6.53635400  | 2.56331300  |
| C | -11.10897300 | 5.90675700  | 3.79533400  |
| H | 12.06345500  | 2.30799200  | -6.78801900 |
| H | 12.06358100  | -0.07987100 | -7.16928800 |
| H | 12.06330700  | 4.15001600  | -5.84800700 |
| H | 12.06360300  | -2.12287500 | -6.84793800 |

|   |              |             |             |
|---|--------------|-------------|-------------|
| H | 12.06351800  | 7.16965200  | 0.09680100  |
| H | 12.06344600  | 6.79424600  | -2.29187900 |
| H | 12.06355000  | 6.84311800  | 2.13909300  |
| H | 12.06337300  | 5.85781700  | -4.13619000 |
| H | 12.06358800  | 2.12293800  | 6.84803600  |
| H | 12.06356800  | 4.27868600  | 5.75279800  |
| H | 12.06358900  | 0.07989700  | 7.16920000  |
| H | 12.06353000  | 5.74279700  | 4.29236600  |
| H | 12.06353800  | -5.74278300 | -4.29234100 |
| H | 12.06355600  | -6.84311500 | -2.13907500 |
| H | 12.06359100  | -4.27863100 | -5.75272000 |
| H | 12.06351100  | -7.16973200 | -0.09680000 |
| H | 12.06337900  | -5.85780500 | 4.13616900  |
| H | 12.06331100  | -4.15001000 | 5.84799400  |
| H | 12.06344100  | -6.79430400 | 2.29188300  |
| H | 12.06346600  | -2.30795400 | 6.78791900  |
| H | -12.06341900 | -4.14965200 | 5.84754400  |
| H | -12.06347900 | -5.85739400 | 4.13577000  |
| H | -12.06353500 | -2.30769600 | 6.78771200  |
| H | -12.06350100 | -6.79413200 | 2.29160400  |
| H | -12.06349200 | 4.27898100  | 5.75291500  |
| H | -12.06355600 | 2.12320600  | 6.84816700  |
| H | -12.06336000 | 5.74362400  | 4.29294400  |
| H | -12.06362000 | 0.08010600  | 7.16898600  |
| H | -12.06349100 | 6.79436300  | -2.29155300 |
| H | -12.06347800 | 7.16975000  | 0.09710000  |
| H | -12.06355400 | 5.85699600  | -4.13543400 |
| H | -12.06339400 | 6.84399800  | 2.13959300  |
| H | -12.06347100 | -6.84357500 | -2.13944300 |
| H | -12.06341500 | -5.74321300 | -4.29276000 |
| H | -12.06351900 | -7.16955700 | -0.09704800 |
| H | -12.06344700 | -4.27915200 | -5.75328900 |
| H | -12.06358000 | -0.08016100 | -7.16917500 |
| H | -12.06352300 | 2.30766700  | -6.78795600 |
| H | -12.06349500 | -2.12334200 | -6.84855600 |
| H | -12.06349500 | 4.14930400  | -5.84715400 |

**UP-6-(5,5)**

|   |             |             |             |
|---|-------------|-------------|-------------|
| C | 1.23412300  | -0.30139000 | -6.46897200 |
| C | 3.55726900  | -0.98474100 | -6.42456000 |
| C | 1.61300600  | 1.02427000  | -6.19974900 |
| H | 0.17586500  | -0.54903900 | -6.57299700 |
| C | 3.93408600  | 0.33001700  | -6.14869300 |
| H | 4.30784600  | -1.77262600 | -6.48689700 |
| H | 0.85869700  | 1.79898400  | -6.07379700 |
| H | 4.98709200  | 0.56829400  | -5.98771900 |
| C | 2.31516700  | 6.88050200  | 0.11181500  |
| C | 4.23809500  | 8.17777800  | -0.83838200 |
| C | 3.30564500  | 7.17322100  | -0.94708500 |
| C | 3.12545700  | 6.34040700  | -2.15247000 |
| C | 4.20335600  | 5.80435800  | -2.87654900 |
| C | 1.61395700  | 5.06832700  | -3.58857500 |
| C | 4.01556400  | 4.93233500  | -3.95350400 |
| H | 5.22246100  | 6.01823500  | -2.55878300 |
| H | 0.62714600  | 4.67964500  | -3.82639700 |
| H | 4.88551200  | 4.54261200  | -4.47565200 |
| C | 2.96783400  | 1.34887700  | -6.03993500 |
| C | 2.71049500  | 4.52649900  | -4.28261500 |
| C | 3.46351200  | 2.74366900  | -5.71910700 |
| H | 3.89628000  | 3.22808100  | -6.61436500 |
| H | 4.26437800  | 2.64570600  | -4.97103600 |
| O | 2.40055100  | 3.56311600  | -5.21241400 |
| C | 1.79472800  | 5.98320300  | -2.53863500 |
| C | 0.66769300  | 6.53020800  | -1.74120700 |
| C | -0.51622000 | 6.94174200  | -2.31569700 |
| S | -0.85981100 | 6.87433700  | -4.08058100 |
| S | -1.85734100 | 7.72479800  | -1.41029400 |
| C | -2.33280700 | 7.83363800  | -4.02868000 |
| H | -2.81860700 | 8.05233400  | -4.97748600 |
| C | -2.78548900 | 8.21826100  | -2.82002400 |
| H | -3.69185500 | 8.79395500  | -2.64387900 |
| S | 5.33838300  | 8.67374300  | -2.17242400 |

|   |             |             |             |
|---|-------------|-------------|-------------|
| C | 5.45960800  | 10.42564500 | -0.16572100 |
| H | 5.73540200  | 11.30095500 | 0.41909600  |
| S | 4.40769700  | 9.24104500  | 0.60257800  |
| C | 5.88169400  | 10.16989900 | -1.41899100 |
| H | 6.54861100  | 10.80646600 | -1.99699700 |
| C | 1.70758000  | 6.49592600  | 2.44915500  |
| C | 0.96359600  | 6.62815600  | -0.29181600 |
| C | 0.01297200  | 6.40127600  | 0.72045100  |
| H | -1.01451200 | 6.16543100  | 0.45543600  |
| C | 0.35976000  | 6.36064600  | 2.07584200  |
| H | -0.40488800 | 6.14397500  | 2.81894300  |
| C | 2.67102600  | 6.77959000  | 1.46441200  |
| H | 3.71400900  | 6.83991700  | 1.76995200  |
| O | 2.17880100  | 6.32693000  | 3.72346400  |
| C | 2.42766500  | 4.69260100  | 5.47750600  |
| H | 2.95765300  | 5.38144500  | 6.15352400  |
| H | 3.17960700  | 4.25856500  | 4.80187500  |
| C | 1.74463200  | 3.55377700  | 6.26185600  |
| H | 1.02984900  | 3.04825000  | 5.59237200  |
| H | 1.15386500  | 3.95721600  | 7.10111700  |
| C | 2.75255400  | 2.50191300  | 6.76240500  |
| H | 3.34412500  | 2.90329400  | 7.60266000  |
| H | 3.46718100  | 2.29858800  | 5.94914700  |
| C | 2.09409100  | 1.16838100  | 7.15592200  |
| H | 1.40477500  | 0.87213700  | 6.34905800  |
| H | 1.48049200  | 1.28240100  | 8.06460700  |
| C | 1.43156300  | 5.45678900  | 4.60553000  |
| H | 0.72506100  | 6.05486200  | 5.20731300  |
| H | 0.85137200  | 4.73517500  | 4.00937900  |
| C | 3.12853100  | 0.03602500  | 7.36043800  |
| O | 1.71537700  | -6.12404400 | 3.11133700  |
| C | 2.19032000  | -6.29350500 | 1.83970300  |
| C | 2.93884000  | -6.50715900 | -0.88338100 |
| C | 1.20991800  | -6.32482000 | 0.83179900  |
| H | 0.17801500  | -6.16567200 | 1.13448900  |
| C | 3.55028100  | -6.36879000 | 1.49136800  |

|   |             |              |             |
|---|-------------|--------------|-------------|
| H | 4.33145700  | -6.28362500  | 2.24178700  |
| C | 3.90171300  | -6.45672300  | 0.13964200  |
| H | 4.95742900  | -6.41190100  | -0.12188400 |
| C | 1.55522300  | -6.44283700  | -0.52217800 |
| C | 0.54836400  | -6.42280900  | -1.60953800 |
| C | 3.28785700  | -6.54414300  | -2.31963900 |
| C | 2.38465100  | -5.73659500  | -3.16919300 |
| C | 0.99542200  | -5.69848500  | -2.82074400 |
| C | 2.83653000  | -5.00279500  | -4.27612700 |
| H | 3.89733300  | -4.94824100  | -4.51210200 |
| C | 0.13956900  | -4.92491900  | -3.62365600 |
| H | -0.90117200 | -4.80184400  | -3.33530800 |
| C | 0.58713000  | -4.22888400  | -4.75299900 |
| H | -0.12812900 | -3.62897400  | -5.30993500 |
| C | 1.94699400  | -4.28181100  | -5.09596300 |
| O | 2.52331600  | -3.71628500  | -6.20755100 |
| C | 2.19854500  | -1.31349000  | -6.59352000 |
| C | 1.81963400  | -2.72750600  | -6.98692000 |
| C | 4.28553800  | -7.34444000  | -2.83056100 |
| C | -0.66211300 | -7.07863500  | -1.52095700 |
| S | 4.66134000  | -7.50735200  | -4.58248000 |
| S | 5.27307700  | -8.46803300  | -1.83003400 |
| S | -1.18542200 | -8.05037100  | -0.10025800 |
| S | -1.85437400 | -7.17693800  | -2.86353600 |
| C | 5.96462500  | -9.36325400  | -3.17874300 |
| H | 6.60060600  | -10.21331100 | -2.93978700 |
| C | 5.68725400  | -8.92916500  | -4.42312900 |
| H | 6.06544000  | -9.37615300  | -5.34040300 |
| C | -2.87389500 | -8.40871000  | -2.13087900 |
| H | -3.71407400 | -8.77456800  | -2.71759800 |
| C | -2.57013100 | -8.80394400  | -0.87986100 |
| H | -3.12813500 | -9.53823400  | -0.30231700 |
| H | 2.14637800  | -2.92520300  | -8.01955100 |
| H | 0.73016500  | -2.86919300  | -6.95728800 |
| H | 3.85667800  | 0.09353000   | 6.53258900  |
| H | 3.69133800  | 0.19202800   | 8.29519600  |

|   |             |             |             |
|---|-------------|-------------|-------------|
| C | -1.85538100 | -3.28123100 | 6.16407100  |
| H | -2.55091100 | -4.13644400 | 6.19615100  |
| C | -0.72459200 | -3.48170000 | 7.19548600  |
| H | -0.07520800 | -2.59116600 | 7.20371700  |
| H | -1.16546700 | -3.55475100 | 8.20273900  |
| C | 0.13211400  | -4.72979500 | 6.91370800  |
| H | -0.51979500 | -5.61949800 | 6.86033800  |
| H | 0.81169300  | -4.90017200 | 7.76650900  |
| C | 0.96870300  | -4.64547400 | 5.62354300  |
| H | 0.31350600  | -4.59486800 | 4.74211400  |
| H | 1.56758800  | -3.71980400 | 5.62836800  |
| C | 1.90654100  | -5.85633100 | 5.48610500  |
| H | 1.32837200  | -6.78885800 | 5.59235200  |
| H | -1.40681700 | -3.27574300 | 5.15846200  |
| C | 2.67351300  | -5.92003400 | 4.16843600  |
| H | 3.23392300  | -4.98798200 | 3.97775200  |
| H | 3.39023600  | -6.75961000 | 4.18360700  |
| H | 2.64618800  | -5.84303200 | 6.30400800  |
| C | 10.26214000 | 3.16463400  | -0.85913800 |
| C | 10.29598500 | 2.32912600  | -1.96014500 |
| C | 9.10472300  | 1.67254800  | -2.41188600 |
| C | 7.86173900  | 2.24767700  | -2.00945400 |
| C | 7.82608400  | 3.12039900  | -0.86213400 |
| C | 9.03527600  | 3.38676100  | -0.15210800 |
| C | 6.62496500  | 1.66666900  | -2.45965700 |
| C | 6.62776200  | 0.30211800  | -2.87999800 |
| C | 7.86773000  | -0.42623700 | -2.83198300 |
| C | 9.10789500  | 0.28083900  | -2.83964300 |
| C | 7.83716100  | -1.79313100 | -2.37345300 |
| C | 9.04813600  | -2.40785100 | -1.93411100 |
| C | 10.27346200 | -1.82083500 | -2.39048000 |
| C | 10.30258800 | -0.51084600 | -2.83166600 |
| C | 6.55646200  | 3.36311300  | -0.22928000 |
| C | 5.34326400  | 3.15296000  | -0.96096700 |
| C | 5.37990700  | 2.27752900  | -2.10306100 |
| C | 4.15932500  | 1.69416900  | -2.55457000 |

|   |             |             |             |
|---|-------------|-------------|-------------|
| C | 4.16170500  | 0.32234900  | -2.97771500 |
| C | 5.38512500  | -0.40839300 | -2.93084800 |
| C | 5.35410200  | -1.77615500 | -2.48059700 |
| C | 6.56914200  | -2.35523300 | -1.98985900 |
| C | 4.08834800  | 3.39964700  | -0.32845700 |
| C | 2.87510900  | 3.16560500  | -1.05538600 |
| C | 2.91149400  | 2.29851200  | -2.18961200 |
| C | 1.68862900  | 1.72423600  | -2.66283700 |
| C | 1.69107200  | 0.35103700  | -3.07977900 |
| C | 2.91581600  | -0.38577500 | -3.01555700 |
| C | 2.88413100  | -1.74115300 | -2.56616700 |
| C | 4.10087500  | -2.34042100 | -2.09647600 |
| C | 1.61375100  | 3.41302500  | -0.42542500 |
| C | -0.78148000 | 1.75297200  | -2.77260600 |
| C | -0.77886200 | 0.38189000  | -3.18741100 |
| C | 0.45088500  | -0.35294900 | -3.12069500 |
| C | 0.41864300  | -1.70732300 | -2.65041600 |
| C | 1.62591200  | -2.30245400 | -2.17948500 |
| C | -0.85313200 | 3.42116400  | -0.52077400 |
| C | -2.06685600 | 3.21760300  | -1.25557600 |
| C | -2.03075200 | 2.35969200  | -2.41093300 |
| C | -3.25366400 | 1.78021100  | -2.86930000 |
| C | -3.25054000 | 0.40204700  | -3.28788300 |
| C | -2.02454900 | -0.32865000 | -3.22735900 |
| C | -2.05538100 | -1.68798600 | -2.75240000 |
| C | -0.84107100 | -2.26515100 | -2.25829800 |
| C | -3.32188300 | 3.46189500  | -0.61853500 |
| C | -4.53729800 | 3.23592500  | -1.34625300 |
| C | -4.50239900 | 2.37737900  | -2.49196100 |
| C | -5.73182900 | 1.79855600  | -2.95570600 |
| C | -5.72838200 | 0.42229200  | -3.37626000 |
| C | -4.49563600 | -0.31066200 | -3.31227700 |
| C | -4.52524400 | -1.66502400 | -2.84665700 |
| C | -3.30878700 | -2.25709300 | -2.37026500 |
| C | -5.80029300 | 3.48379800  | -0.70984200 |
| C | -7.00901100 | 3.26150600  | -1.43599700 |



|   |              |             |             |
|---|--------------|-------------|-------------|
| C | -6.97391400  | 2.39726200  | -2.58692400 |
| C | -8.20218700  | 1.80853200  | -3.03344400 |
| C | -8.19867800  | 0.44532600  | -3.45139700 |
| C | -6.96697600  | -0.28650300 | -3.40916600 |
| C | -6.99664100  | -1.64829800 | -2.94273600 |
| C | -5.78640000  | -2.23564200 | -2.46540100 |
| C | -8.27078300  | 3.48939800  | -0.79503800 |
| C | -9.49388400  | 3.27594300  | -1.52212400 |
| C | -9.45857700  | 2.41037900  | -2.67426800 |
| C | -10.67830000 | 1.85911600  | -3.17009300 |
| C | -10.67469600 | 0.46835600  | -3.59742800 |
| C | -9.45168200  | -0.26044500 | -3.49426900 |
| C | -9.48144500  | -1.62415100 | -3.02811500 |
| C | -8.25660700  | -2.20426600 | -2.54512300 |
| C | -10.74784600 | 3.56224300  | -0.90313200 |
| C | -11.92229200 | 3.36650000  | -1.70175000 |
| C | -11.88839100 | 2.53630300  | -2.80631900 |
| C | -10.73337000 | -2.21532400 | -2.68057700 |
| C | -11.90961500 | -1.60951100 | -3.23247700 |
| C | -11.88106700 | -0.30181400 | -3.67927700 |
| C | -8.30836000  | -3.02545300 | -1.38060000 |
| C | -9.58273100  | -3.23293600 | -0.74587500 |
| C | -10.78609600 | -3.05307000 | -1.49220100 |
| C | -5.83873800  | -3.06574700 | -1.29087700 |
| C | -7.09862400  | -3.26571200 | -0.65033000 |
| C | -7.15333900  | -3.24556300 | 0.78832600  |
| C | -8.41456100  | -2.98546900 | 1.41770300  |
| C | -9.63743000  | -3.21230500 | 0.69444500  |
| C | -10.89363400 | -3.01162100 | 1.34179700  |
| C | -12.06955800 | -3.29896900 | 0.57372600  |
| C | -12.01712300 | -3.31914500 | -0.80736800 |
| C | -8.44990500  | -2.13029200 | 2.55814600  |
| C | -9.70688700  | -1.53592800 | 2.92814500  |
| C | -10.92983400 | -2.13811800 | 2.50482200  |
| C | -5.94538200  | -3.02654300 | 1.51649300  |
| C | -5.98076300  | -2.16343300 | 2.66771800  |

|   |              |             |             |
|---|--------------|-------------|-------------|
| C | -7.22274400  | -1.56223500 | 3.03351000  |
| C | -7.22621000  | -0.18555900 | 3.45573100  |
| C | -8.45610300  | 0.54673600  | 3.37983200  |
| C | -9.71009800  | -0.15793400 | 3.35129300  |
| C | -10.93603800 | 0.57306500  | 3.33797600  |
| C | -12.14657000 | -0.19474700 | 3.35255300  |
| C | -12.14353200 | -1.51594600 | 2.94648600  |
| C | -8.42593400  | 1.89526300  | 2.91724900  |
| C | -9.65076200  | 2.48520700  | 2.44657100  |
| C | -10.90512500 | 1.94946600  | 2.86727000  |
| C | -5.98746300  | 0.52243400  | 3.49179400  |
| C | -5.95715900  | 1.88307700  | 3.02375500  |
| C | -7.16681600  | 2.46959800  | 2.54442500  |
| C | -7.11410800  | 3.29893500  | 1.36867100  |
| C | -8.32425200  | 3.50877900  | 0.62969900  |
| C | -9.59839800  | 3.31551700  | 1.26941900  |
| C | -10.80226900 | 3.58329400  | 0.55068000  |
| C | -12.03326500 | 3.41083100  | 1.26485000  |
| C | -12.08339700 | 2.61463600  | 2.39364700  |
| C | -5.85445900  | 3.50191900  | 0.72824800  |
| C | -4.75138000  | -1.58061200 | 3.12548200  |
| C | -4.75522600  | -0.21203300 | 3.54596200  |
| C | -4.68241100  | -3.26859900 | 0.87828100  |
| C | -4.62765900  | -3.28755100 | -0.55269000 |
| C | -4.69602300  | 2.44667700  | 2.63329100  |
| C | -4.64282700  | 3.27031400  | 1.46259300  |
| C | -3.50423600  | -2.18440300 | 2.75857200  |
| C | -3.46851700  | -3.05250700 | 1.61131400  |
| C | -3.36105300  | -3.09031300 | -1.19654400 |
| C | -3.51190700  | 0.49966100  | 3.58786900  |
| C | -3.48115500  | 1.86104100  | 3.12136500  |
| C | -3.37644300  | 3.47645400  | 0.82083500  |
| C | -2.28351400  | -1.60165300 | 3.21202600  |
| C | -2.28719100  | -0.23173200 | 3.64316200  |
| C | -2.21248000  | -3.29827800 | 0.97774500  |
| C | -2.15792300  | -3.31358600 | -0.46004500 |

|   |             |             |             |
|---|-------------|-------------|-------------|
| C | -2.22649300 | 2.42359500  | 2.73616000  |
| C | -2.17293600 | 3.24410500  | 1.55446600  |
| C | -1.03453000 | -2.20179900 | 2.84498800  |
| C | -0.99783900 | -3.06598700 | 1.70488700  |
| C | -0.89237200 | -3.09435700 | -1.09482300 |
| C | -1.04141100 | 0.47755200  | 3.68097400  |
| C | -1.01123100 | 1.83051500  | 3.21432900  |
| C | -0.90830300 | 3.42521300  | 0.90736700  |
| C | 0.19248900  | -1.63069800 | 3.32017400  |
| C | 0.18973700  | -0.25698200 | 3.74561300  |
| C | 0.26420600  | -3.30710100 | 1.07013300  |
| C | 0.31669100  | -3.32609200 | -0.36433400 |
| C | 0.24911700  | 2.39100800  | 2.82167900  |
| C | 0.30069000  | 3.20759200  | 1.64347100  |
| C | 1.43511300  | -2.23011900 | 2.95072100  |
| C | 1.47128300  | -3.08524700 | 1.79715500  |
| C | 1.57365700  | -3.12954500 | -1.00794400 |
| C | 1.43057800  | 0.45107800  | 3.77347100  |
| C | 1.46098600  | 1.80837600  | 3.30160800  |
| C | 1.55853400  | 3.42082800  | 1.00806800  |
| C | 2.66341100  | -1.64973700 | 3.41007000  |
| C | 2.66150100  | -0.28079800 | 3.82357600  |
| C | 2.72958600  | -3.32116100 | 1.15516800  |
| C | 2.78199500  | -3.35195200 | -0.27239000 |
| C | 2.71684000  | 2.37376600  | 2.90832000  |
| C | 2.76638200  | 3.20388100  | 1.74500700  |
| C | 3.91266400  | -2.25230000 | 3.03997400  |
| C | 3.94578500  | -3.10705200 | 1.88487200  |
| C | 4.04783800  | -3.16352100 | -0.91973500 |
| C | 3.90706300  | 0.43108400  | 3.85608000  |
| C | 3.93582400  | 1.79059300  | 3.39069000  |
| C | 4.03366100  | 3.42247300  | 1.10783400  |
| C | 5.13481500  | -1.67528400 | 3.49887300  |
| C | 5.13195500  | -0.29789000 | 3.91741500  |
| C | 5.19851400  | -3.35712500 | 1.25152800  |
| C | 5.25089900  | -3.38853100 | -0.18710900 |

|   |              |             |             |
|---|--------------|-------------|-------------|
| C | 5.18702300   | 2.36222600  | 3.01270000  |
| C | 5.23725100   | 3.20066700  | 1.84216200  |
| C | 6.38154100   | -2.26635400 | 3.11426900  |
| C | 6.41333300   | -3.12362000 | 1.97427000  |
| C | 6.51634100   | -3.17723400 | -0.82508100 |
| C | 6.37577600   | 0.41324800  | 3.93592400  |
| C | 6.40365300   | 1.76394500  | 3.47787100  |
| C | 6.50283600   | 3.38758800  | 1.19621000  |
| C | 7.61806200   | -1.69318300 | 3.57500300  |
| C | 7.61510800   | -0.31502900 | 3.99849000  |
| C | 7.68218000   | -3.37884300 | 1.34568400  |
| C | 7.73503900   | -3.40599700 | -0.09498500 |
| C | 7.67076400   | 2.33308800  | 3.10325600  |
| C | 7.72161300   | 3.16786600  | 1.92878300  |
| C | 8.85719400   | -2.31934700 | 3.24407000  |
| C | 8.89006600   | -3.19918900 | 2.08507800  |
| C | 8.99450800   | -3.24980600 | -0.74814900 |
| C | 8.85159800   | 0.39341400  | 4.07824200  |
| C | 8.88017000   | 1.77238400  | 3.61387900  |
| C | 8.98059300   | 3.41164400  | 1.30201800  |
| C | 10.04615400  | -1.71777100 | 3.77221400  |
| C | 10.04343100  | -0.39656500 | 4.17912300  |
| C | 10.11402200  | -3.51443700 | 1.40882000  |
| C | 10.16476900  | -3.53876800 | 0.02763300  |
| C | 10.10232000  | 2.41726900  | 3.23288100  |
| C | 10.15117700  | 3.21612400  | 2.10593000  |
| C | 0.44660300   | 2.32965800  | -2.30635200 |
| C | 0.40870600   | 3.18740500  | -1.15538800 |
| H | -13.10115500 | 0.30139900  | 3.52514200  |
| H | -13.09582800 | -2.02733900 | 2.80936300  |
| H | -12.96626300 | 3.77040300  | 0.83195400  |
| H | -13.05451100 | 2.36717600  | 2.82130600  |
| H | -12.82512200 | 2.27396500  | -3.29714200 |
| H | -12.88482000 | 3.73691100  | -1.35027600 |
| H | -13.04132400 | -3.33979900 | 1.06485400  |
| H | -12.94891600 | -3.37531300 | -1.36935200 |

|   |              |             |             |
|---|--------------|-------------|-------------|
| H | -12.86990300 | -2.11801400 | -3.15200000 |
| H | -12.81958500 | 0.18674700  | -3.93945600 |
| H | 10.99688500  | -2.24563600 | 3.70398800  |
| H | 10.99198600  | 0.08182200  | 4.42098700  |
| H | 11.03409400  | 2.15167500  | 3.73125800  |
| H | 11.12027900  | 3.55891200  | 1.74462900  |
| H | 11.20246400  | 3.51862100  | -0.43763600 |
| H | 11.26218500  | 2.04728900  | -2.37756700 |
| H | 11.26719700  | -0.03873800 | -3.01569500 |
| H | 11.21583300  | -2.34614100 | -2.23817900 |
| H | 11.13480200  | -3.61583300 | -0.46261600 |
| H | 11.04518100  | -3.57288900 | 1.97163600  |
| C | 2.49717200   | -1.33092400 | 7.35226600  |
| H | 1.92257500   | -1.57465600 | 6.45175500  |
| C | 2.58236000   | -2.23521800 | 8.33836500  |
| H | 2.09610300   | -3.20809900 | 8.26346300  |
| H | 3.14448400   | -2.02377500 | 9.25176700  |
| C | -2.60954000  | -1.99436900 | 6.36919200  |
| H | -1.99490600  | -1.08889000 | 6.41085800  |
| C | -3.94079700  | -1.88690800 | 6.49272600  |
| H | -4.58533100  | -2.76842300 | 6.44852800  |
| H | -4.42940700  | -0.92058300 | 6.62429900  |

**UP-6-(6,6)**

|   |             |             |             |
|---|-------------|-------------|-------------|
| C | -2.00858500 | -0.24880200 | -6.75106000 |
| C | 0.23493300  | -1.15402400 | -6.78507700 |
| C | -1.49610700 | 1.05391400  | -6.75659600 |
| H | -3.08828200 | -0.39794800 | -6.69149000 |
| C | 0.74773000  | 0.14866500  | -6.78830900 |
| H | 0.90947700  | -2.00707700 | -6.74848200 |
| H | -2.16812800 | 1.90808300  | -6.70013300 |
| H | 1.82894200  | 0.29742900  | -6.76108300 |
| C | -0.27124400 | 7.26569300  | -0.97296000 |
| C | 1.81542400  | 8.24346100  | -1.95965400 |
| C | 0.77199500  | 7.34617400  | -2.02193000 |
| C | 0.52444200  | 6.45036200  | -3.17223800 |

|   |             |             |             |
|---|-------------|-------------|-------------|
| C | 1.54770300  | 5.77838000  | -3.86297500 |
| C | -1.09322600 | 5.20980000  | -4.52527700 |
| C | 1.28466100  | 4.85926800  | -4.88491600 |
| H | 2.58303400  | 5.91522600  | -3.55732300 |
| H | -2.11350200 | 4.89764800  | -4.73755100 |
| H | 2.11893100  | 4.37125000  | -5.38226100 |
| C | -0.10675400 | 1.26306700  | -6.73705200 |
| C | -0.04951900 | 4.53702100  | -5.18777500 |
| C | 0.51760100  | 2.63776900  | -6.58749000 |
| H | 0.90397400  | 3.02080200  | -7.54982600 |
| H | 1.36761300  | 2.53941400  | -5.89608300 |
| O | -0.44915800 | 3.56849500  | -6.07447700 |
| C | -0.83019400 | 6.18395900  | -3.54930100 |
| C | -1.90347300 | 6.91786200  | -2.83690000 |
| C | -2.99904800 | 7.43903900  | -3.49023900 |
| S | -3.29452000 | 7.27058700  | -5.25732300 |
| S | -4.23376800 | 8.48632600  | -2.70706300 |
| C | -4.58596700 | 8.46250000  | -5.34852100 |
| H | -4.99254400 | 8.68229000  | -6.33368500 |
| C | -5.01176100 | 9.01238900  | -4.19525300 |
| H | -5.81386900 | 9.74246300  | -4.10765300 |
| S | 2.99563200  | 8.50679900  | -3.29127400 |
| C | 3.28514900  | 10.37801400 | -1.41613600 |
| H | 3.65298500  | 11.25465700 | -0.88662200 |
| S | 2.07920000  | 9.39045400  | -0.59918800 |
| C | 3.70120600  | 9.97869600  | -2.63324200 |
| H | 4.45508800  | 10.48278800 | -3.23456200 |
| C | -0.98700800 | 7.22331600  | 1.37163800  |
| C | -1.63195400 | 7.11398900  | -1.39511300 |
| C | -2.62906800 | 7.09113500  | -0.40416600 |
| H | -3.66596400 | 6.92030500  | -0.68619100 |
| C | -2.33156600 | 7.18054100  | 0.96116000  |
| H | -3.14204900 | 7.14087300  | 1.68504100  |
| C | 0.02894000  | 7.28074000  | 0.39737700  |
| H | 1.06166500  | 7.25947100  | 0.73990300  |
| O | -0.55935700 | 7.16305900  | 2.67049100  |

|   |             |             |             |
|---|-------------|-------------|-------------|
| C | -0.74739700 | 6.04188000  | 4.80886200  |
| H | -0.15506300 | 6.76341700  | 5.39268300  |
| H | -0.04032700 | 5.33754500  | 4.34727600  |
| C | -1.72241500 | 5.25643200  | 5.70758900  |
| H | -2.40859400 | 4.68899700  | 5.05778100  |
| H | -2.35187100 | 5.94815100  | 6.29305500  |
| C | -1.02425900 | 4.25254000  | 6.64129700  |
| H | -0.43712000 | 4.78168500  | 7.41088600  |
| H | -0.30382400 | 3.67014900  | 6.04681600  |
| C | -2.01968200 | 3.28177400  | 7.30405800  |
| H | -2.75140000 | 2.94637300  | 6.55250400  |
| H | -2.59490100 | 3.80543000  | 8.08695600  |
| C | -1.50390200 | 6.74369200  | 3.67973200  |
| H | -2.07177100 | 7.61885900  | 4.04139600  |
| H | -2.21645000 | 6.02939100  | 3.24209600  |
| C | -1.33427900 | 2.03053100  | 7.90013100  |
| O | -0.20497400 | -7.24259000 | 2.71688300  |
| C | 0.17347300  | -7.26990900 | 1.40102000  |
| C | 0.71717900  | -7.10145700 | -1.38478000 |
| C | -0.87403200 | -7.34695600 | 0.46291500  |
| H | -1.89421900 | -7.36520700 | 0.84122700  |
| C | 1.49912800  | -7.17110800 | 0.94467800  |
| H | 2.33174200  | -7.10879300 | 1.64125700  |
| C | 1.74596800  | -7.04974700 | -0.42806900 |
| H | 2.76571800  | -6.83889600 | -0.74272300 |
| C | -0.62251200 | -7.30411800 | -0.91656500 |
| C | -1.69641100 | -7.41958300 | -1.92977000 |
| C | 0.93432800  | -6.89948600 | -2.83485300 |
| C | -0.18832500 | -6.21117600 | -3.51582400 |
| C | -1.51917200 | -6.51706600 | -3.08681300 |
| C | 0.00432700  | -5.24407100 | -4.51479700 |
| H | 1.00359900  | -4.89718800 | -4.76853800 |
| C | -2.58972000 | -5.87992000 | -3.73700100 |
| H | -3.60648400 | -6.04310000 | -3.38482000 |
| C | -2.39595500 | -4.97071000 | -4.78298500 |
| H | -3.26265500 | -4.50984600 | -5.25014100 |

|   |             |              |             |
|---|-------------|--------------|-------------|
| C | -1.08625000 | -4.61982700  | -5.14878000 |
| O | -0.75423600 | -3.65679900  | -6.06838200 |
| C | -1.15159000 | -1.36373900  | -6.72603900 |
| C | -1.75909900 | -2.74199800  | -6.53665900 |
| C | 2.02917100  | -7.38043300  | -3.52077700 |
| C | -2.70214900 | -8.35667400  | -1.83965500 |
| S | 2.25884600  | -7.21624400  | -5.29837800 |
| S | 3.33273300  | -8.36871900  | -2.77295700 |
| S | -2.87824400 | -9.52103100  | -0.47960400 |
| S | -3.91172200 | -8.65964500  | -3.13661900 |
| C | 4.07819800  | -8.87977100  | -4.28272200 |
| H | 4.91113400  | -9.57686100  | -4.21681800 |
| C | 3.59140100  | -8.35827900  | -5.42494900 |
| H | 3.97205000  | -8.57121200  | -6.42191700 |
| C | -4.52913100 | -10.16825600 | -2.47237800 |
| H | -5.27603600 | -10.70202700 | -3.05658300 |
| C | -4.06025900 | -10.55742900 | -1.27132200 |
| H | -4.37192400 | -11.45427600 | -0.73958000 |
| H | -2.19180800 | -3.13651200  | -7.47427600 |
| H | -2.57257200 | -2.64806500  | -5.80147700 |
| H | -0.78689400 | 1.50228900   | 7.10508200  |
| H | -0.58147100 | 2.34947800   | 8.64278000  |
| C | 0.49156000  | -1.90162900  | 7.64951400  |
| H | -0.25476200 | -2.08405600  | 8.43851400  |
| C | 1.19334400  | -3.21379000  | 7.23730100  |
| H | 1.97773800  | -2.96469300  | 6.50441100  |
| H | 1.70739600  | -3.65712300  | 8.10574900  |
| C | 0.22615200  | -4.23176900  | 6.59893400  |
| H | -0.49068400 | -3.68690700  | 5.96453100  |
| H | -0.37001900 | -4.73713300  | 7.37711500  |
| C | 0.95229100  | -5.26231300  | 5.71598500  |
| H | 1.63555800  | -4.70701400  | 5.05237900  |
| H | 1.58705200  | -5.92021000  | 6.33328800  |
| C | -0.00427600 | -6.09662000  | 4.83972400  |
| H | -0.75913300 | -5.42918000  | 4.39944700  |
| H | -0.06731700 | -1.53969000  | 6.77003800  |



|   |              |             |             |
|---|--------------|-------------|-------------|
| C | 0.75116900   | -6.75465100 | 3.68418600  |
| H | 1.39576400   | -5.99765300 | 3.21313300  |
| H | 1.39170300   | -7.58672400 | 4.02587600  |
| H | -0.54228800  | -6.84968100 | 5.43600900  |
| C | -2.32861200  | 1.09752100  | 8.54214000  |
| C | -2.61833700  | -0.13662700 | 8.10349900  |
| H | -2.10526200  | -0.56178200 | 7.24024200  |
| H | -3.37178400  | -0.75802400 | 8.59139600  |
| C | 1.45496700   | -0.82779400 | 8.08228800  |
| C | 1.35418900   | -0.10835100 | 9.20930600  |
| H | 0.52775900   | -0.26731700 | 9.90593600  |
| H | 2.07947300   | 0.66776900  | 9.46095900  |
| H | 2.28697200   | -0.63679400 | 7.39523500  |
| H | -2.87109200  | 1.49777600  | 9.40672400  |
| H | -11.86411000 | -2.47521500 | -3.16020400 |
| H | -11.83397900 | -4.08132300 | -1.33564800 |
| H | -11.81045800 | -4.51143600 | 0.76204000  |
| H | -11.79606000 | -3.73889700 | 3.06756600  |
| H | -11.79857100 | -2.12786100 | 4.47846500  |
| H | -11.81612000 | 0.25730200  | 4.94961100  |
| H | -11.88712600 | -0.44863400 | -3.85004800 |
| H | -11.90224400 | 1.93644200  | -3.37967900 |
| H | -11.90144300 | 3.54845700  | -1.96895400 |
| H | -11.88711800 | 4.32075700  | 0.33656400  |
| H | -11.86699700 | 3.88969500  | 2.43245900  |
| H | -11.83937700 | 2.28392600  | 4.25754400  |
| C | -10.90473400 | -2.76633400 | -2.73423100 |
| C | -10.88760000 | -3.68016900 | -1.69627900 |
| C | -10.85542800 | -4.27623600 | 1.23026000  |
| C | -10.84726800 | -3.83686700 | 2.54146000  |
| C | -10.85018500 | -1.59299100 | 4.51070900  |
| C | -10.86022500 | -0.23629400 | 4.77860700  |
| C | -10.93685100 | 0.06122000  | -3.69634400 |
| C | -10.94544300 | 1.41806600  | -3.42909900 |
| C | -10.94499900 | 3.66254100  | -1.46017700 |
| C | -10.93688600 | 4.10163900  | -0.14887700 |

|   |              |             |             |
|---|--------------|-------------|-------------|
| C | -10.90810500 | 3.50439500  | 2.77691600  |
| C | -10.89245100 | 2.59096100  | 3.81522600  |
| C | -9.71417900  | -2.07573700 | -3.12477800 |
| C | -9.67885700  | -3.96064500 | -0.98419300 |
| C | -9.66306000  | -4.25065900 | 0.44004800  |
| C | -9.64622800  | -3.34411600 | 3.14296900  |
| C | -9.64774900  | -2.25190800 | 4.10206400  |
| C | -9.66824600  | 0.54517300  | 4.65522200  |
| C | -9.72971400  | -0.69980700 | -3.59362900 |
| C | -9.74734900  | 2.09791500  | -3.04269800 |
| C | -9.74700600  | 3.19029400  | -2.08370200 |
| C | -9.73026000  | 4.09504900  | 0.61987000  |
| C | -9.71650300  | 3.80439600  | 2.04411000  |
| C | -9.68399800  | 1.92094300  | 4.18600200  |
| C | -8.47141200  | -2.63270300 | -2.69381300 |
| C | -8.45357300  | -3.58387100 | -1.61420100 |
| C | -8.42329900  | -4.14396600 | 1.14148400  |
| C | -8.41474100  | -3.68614200 | 2.50535900  |
| C | -8.41743900  | -1.57447900 | 4.36165100  |
| C | -8.42797700  | -0.16332000 | 4.64129900  |
| C | -8.50149000  | 0.02970900  | -3.60142500 |
| C | -8.51043100  | 1.44156800  | -3.32418600 |
| C | -8.51010900  | 3.55337700  | -1.46858500 |
| C | -8.50165500  | 4.00885900  | -0.10371900 |
| C | -8.47463200  | 3.44768100  | 2.65274100  |
| C | -8.45834000  | 2.49848500  | 3.73402500  |
| C | -7.23309800  | -2.02203000 | -3.09579000 |
| C | -7.19841700  | -3.88592400 | -0.98081700 |
| C | -7.18263500  | -4.16978400 | 0.41529300  |
| C | -7.16583700  | -3.27135600 | 3.08550900  |
| C | -7.16739200  | -2.20166200 | 4.02647800  |
| C | -7.18781000  | 0.56133800  | 4.57705600  |
| C | -7.24795900  | -0.67341300 | -3.55651900 |
| C | -7.26574600  | 2.09185800  | -3.01396400 |
| C | -7.26545800  | 3.16188700  | -2.07321300 |
| C | -7.24852700  | 4.05192400  | 0.60042000  |

|   |             |             |             |
|---|-------------|-------------|-------------|
| C | -7.23546800 | 3.76780500  | 1.99692000  |
| C | -7.20355700 | 1.90977200  | 4.11711200  |
| C | -5.98645100 | -2.61759700 | -2.71875200 |
| C | -5.96844500 | -3.56858500 | -1.64186400 |
| C | -5.93741600 | -4.13040000 | 1.12272900  |
| C | -5.92861600 | -3.67083500 | 2.48404600  |
| C | -5.93153300 | -1.55300200 | 4.34814100  |
| C | -5.94228100 | -0.14435400 | 4.63059500  |
| C | -6.01591000 | 0.05407800  | -3.63221100 |
| C | -6.02472300 | 1.46468800  | -3.35782200 |
| C | -6.02429900 | 3.58178200  | -1.49453000 |
| C | -6.01589200 | 4.03208900  | -0.12962100 |
| C | -5.98966400 | 3.47108700  | 2.63808700  |
| C | -5.97325200 | 2.52600300  | 3.72059500  |
| C | -4.76098100 | -2.01029200 | -3.12831300 |
| C | -4.72624900 | -3.88169100 | -1.01118700 |
| C | -4.70977300 | -4.16943300 | 0.39559000  |
| C | -4.69222000 | -3.26427700 | 3.07179100  |
| C | -4.69416700 | -2.18649000 | 4.02132500  |
| C | -4.71544700 | 0.58318900  | 4.57964900  |
| C | -4.77515000 | -0.65119800 | -3.59473000 |
| C | -4.79306500 | 2.12265400  | -3.05820100 |
| C | -4.79310100 | 3.19990400  | -2.10827500 |
| C | -4.77611400 | 4.08059000  | 0.57599800  |
| C | -4.76395700 | 3.79912300  | 1.98446700  |
| C | -4.73198100 | 1.94196300  | 4.11595800  |
| C | -3.51499600 | -2.59581900 | -2.73188900 |
| C | -3.49653200 | -3.54445200 | -1.66444900 |
| C | -3.46237500 | -4.10906400 | 1.10208800  |
| C | -3.45370700 | -3.64951300 | 2.45741200  |
| C | -3.45750300 | -1.52692600 | 4.32894100  |
| C | -3.46865500 | -0.12502300 | 4.61140900  |
| C | -3.54133000 | 0.07856100  | -3.64642400 |
| C | -3.54952900 | 1.48433600  | -3.38335300 |
| C | -3.54993900 | 3.59965700  | -1.51361200 |
| C | -3.54268500 | 4.03309400  | -0.15263700 |

|   |             |             |             |
|---|-------------|-------------|-------------|
| C | -3.51765100 | 3.48173400  | 2.61794900  |
| C | -3.50087600 | 2.54639600  | 3.69792900  |
| C | -2.28537900 | -1.98878600 | -3.14288400 |
| C | -2.24916500 | -3.86228000 | -1.03759400 |
| C | -2.23145700 | -4.14253200 | 0.36856400  |
| C | -2.21312300 | -3.23602900 | 3.04410400  |
| C | -2.21489600 | -2.15984100 | 3.99601000  |
| C | -2.23771800 | 0.60626000  | 4.55697600  |
| C | -2.29795400 | -0.63053100 | -3.59738600 |
| C | -2.31282100 | 2.14086700  | -3.07615800 |
| C | -2.31319800 | 3.21429700  | -2.12416900 |
| C | -2.30042600 | 4.08048300  | 0.55568000  |
| C | -2.28713300 | 3.80380500  | 1.95938700  |
| C | -2.25345500 | 1.96171000  | 4.09099200  |
| C | -1.04523000 | -2.58659200 | -2.76906500 |
| C | -1.02694100 | -3.53811100 | -1.69838000 |
| C | -0.98933400 | -4.07299500 | 1.06841800  |
| C | -0.98093800 | -3.60922800 | 2.42442900  |
| C | -0.98487500 | -1.49941700 | 4.29803800  |
| C | -0.99549200 | -0.09554700 | 4.59088400  |
| C | -1.06964600 | 0.09162000  | -3.65220700 |
| C | -1.07717600 | 1.49854600  | -3.39012800 |
| C | -1.07881900 | 3.60872800  | -1.52580000 |
| C | -1.07274000 | 4.05496500  | -0.16697000 |
| C | -1.04564900 | 3.50611600  | 2.59652200  |
| C | -1.02887700 | 2.56713300  | 3.67757300  |
| C | 0.18296800  | -1.97883500 | -3.18206400 |
| C | 0.22198400  | -3.84277000 | -1.06899500 |
| C | 0.23931700  | -4.09568300 | 0.33460100  |
| C | 0.25836100  | -3.18718500 | 3.00480200  |
| C | 0.25815500  | -2.12228100 | 3.95435900  |
| C | 0.23657300  | 0.63524100  | 4.53543800  |
| C | 0.16952400  | -0.62029900 | -3.61785100 |
| C | 0.15797500  | 2.14673900  | -3.07162800 |
| C | 0.15775900  | 3.21362400  | -2.12591800 |
| C | 0.16838700  | 4.11875900  | 0.54347800  |

|   |            |             |             |
|---|------------|-------------|-------------|
| C | 0.18339100 | 3.84102700  | 1.94355500  |
| C | 0.22014500 | 1.98680300  | 4.07162200  |
| C | 1.43097600 | -2.58072100 | -2.81523500 |
| C | 1.45008400 | -3.52522800 | -1.73574200 |
| C | 1.48379600 | -4.02766500 | 1.03584100  |
| C | 1.49409000 | -3.56894600 | 2.39155000  |
| C | 1.49320900 | -1.47191100 | 4.27492300  |
| C | 1.48352500 | -0.06922200 | 4.57346600  |
| C | 1.40304800 | 0.10390700  | -3.68321100 |
| C | 1.39651900 | 1.50863600  | -3.40126800 |
| C | 1.39518400 | 3.62349000  | -1.53660000 |
| C | 1.40225800 | 4.09168600  | -0.18288000 |
| C | 1.43078900 | 3.55038600  | 2.58707400  |
| C | 1.44968100 | 2.60478900  | 3.66813800  |
| C | 2.65719000 | -1.97277700 | -3.22792600 |
| C | 2.69414000 | -3.82451100 | -1.10219400 |
| C | 2.71062400 | -4.07456200 | 0.30992100  |
| C | 2.73056900 | -3.17336500 | 2.98579100  |
| C | 2.73023900 | -2.10336900 | 3.94257900  |
| C | 2.71116800 | 0.66044100  | 4.52031800  |
| C | 2.64216800 | -0.60484700 | -3.66959500 |
| C | 2.62810000 | 2.16281000  | -3.09603700 |
| C | 2.62702500 | 3.23706700  | -2.14462900 |
| C | 2.64169800 | 4.16123200  | 0.52322600  |
| C | 2.65693400 | 3.88456100  | 1.93377700  |
| C | 2.69433300 | 2.02219400  | 4.06096700  |
| C | 3.90611200 | -2.55993300 | -2.83922400 |
| C | 3.92438800 | -3.50046000 | -1.76107300 |
| C | 3.95375800 | -4.02286400 | 1.01793600  |
| C | 3.96459100 | -3.56408900 | 2.37369700  |
| C | 3.96633000 | -1.45037000 | 4.25515800  |
| C | 3.95680800 | -0.04922700 | 4.54632700  |
| C | 3.87461300 | 0.12566500  | -3.72255400 |
| C | 3.86709400 | 1.52726500  | -3.43050000 |
| C | 3.86577900 | 3.65127200  | -1.55975500 |
| C | 3.87392500 | 4.11915900  | -0.20723800 |

|   |            |             |             |
|---|------------|-------------|-------------|
| C | 3.90489200 | 3.57310200  | 2.56698300  |
| C | 3.92395300 | 2.63007900  | 3.64342800  |
| C | 5.13801600 | -1.94650600 | -3.24704700 |
| C | 5.17273700 | -3.80543500 | -1.12232500 |
| C | 5.18787600 | -4.07335500 | 0.28857500  |
| C | 5.20695700 | -3.16052000 | 2.96552800  |
| C | 5.20781100 | -2.08663500 | 3.91922600  |
| C | 5.19084400 | 0.68052800  | 4.48953100  |
| C | 5.12225100 | -0.58268500 | -3.69709600 |
| C | 5.10414000 | 2.18546900  | -3.12279000 |
| C | 5.10322700 | 3.26378500  | -2.17408000 |
| C | 5.12075800 | 4.17999400  | 0.49903300  |
| C | 5.13663500 | 3.90299500  | 1.90800600  |
| C | 5.17408600 | 2.04149000  | 4.03194000  |
| C | 6.38127300 | -2.53010800 | -2.85608100 |
| C | 6.39903000 | -3.47664600 | -1.77534400 |
| C | 6.42785000 | -4.01231900 | 0.99432600  |
| C | 6.43760100 | -3.54734000 | 2.35411600  |
| C | 6.43988300 | -1.43388200 | 4.22462300  |
| C | 6.43112900 | -0.02676900 | 4.51438400  |
| C | 6.34954100 | 0.14615400  | -3.74474700 |
| C | 6.34047000 | 1.55331600  | -3.45349800 |
| C | 6.33943200 | 3.67219300  | -1.58896200 |
| C | 6.34816100 | 4.13744400  | -0.22952700 |
| C | 6.38014000 | 3.59350000  | 2.53763300  |
| C | 6.39925200 | 2.64651600  | 3.61776500  |
| C | 7.61117600 | -1.91063100 | -3.24993800 |
| C | 7.64565600 | -3.76754200 | -1.13290900 |
| C | 7.66041500 | -4.03942600 | 0.26571700  |
| C | 7.67869600 | -3.12826100 | 2.93313400  |
| C | 7.67984800 | -2.06068700 | 3.87677700  |
| C | 7.66332600 | 0.69935600  | 4.44281100  |
| C | 7.59533700 | -0.55878600 | -3.69957600 |
| C | 7.57629100 | 2.20176000  | -3.13220200 |
| C | 7.57565800 | 3.27159900  | -2.19099600 |
| C | 7.59362200 | 4.18203700  | 0.47572700  |

|   |             |             |             |
|---|-------------|-------------|-------------|
| C | 7.60979100  | 3.90771300  | 1.87363500  |
| C | 7.64713600  | 2.05011000  | 3.99041000  |
| C | 8.86701500  | -2.49968400 | -2.87070600 |
| C | 8.88463800  | -3.44866700 | -1.78962800 |
| C | 8.91361400  | -3.98926400 | 0.96954600  |
| C | 8.92302600  | -3.52420700 | 2.33103200  |
| C | 8.92507700  | -1.41428400 | 4.19160100  |
| C | 8.91658900  | -0.00493600 | 4.48026500  |
| C | 8.83550100  | 0.16692900  | -3.76052800 |
| C | 8.82585100  | 1.57630300  | -3.47164700 |
| C | 8.82483100  | 3.68806100  | -1.61322100 |
| C | 8.83391700  | 4.15282300  | -0.25169700 |
| C | 8.86606200  | 3.60988500  | 2.50686300  |
| C | 8.88518600  | 2.66084000  | 3.58782000  |
| C | 10.09214000 | -1.91984200 | -3.32128600 |
| C | 10.12709500 | -3.80143000 | -1.17975900 |
| C | 10.14197500 | -4.08188800 | 0.24656900  |
| C | 10.16030200 | -3.16129500 | 2.94583400  |
| C | 10.16150200 | -2.07016300 | 3.90648700  |
| C | 10.14475500 | 0.72412800  | 4.47680500  |
| C | 10.07586700 | -0.54108700 | -3.78194100 |
| C | 10.05647000 | 2.25327600  | -3.21159200 |
| C | 10.05585400 | 3.34487600  | -2.25133100 |
| C | 10.07405100 | 4.26515900  | 0.44794500  |
| C | 10.09066800 | 3.98423100  | 1.87416000  |
| C | 10.12842200 | 2.10271200  | 4.01576100  |
| C | 11.30108200 | -2.59029000 | -2.95302300 |
| C | 11.31802800 | -3.50321300 | -1.91422300 |
| C | 11.34870800 | -4.08301700 | 1.01487000  |
| C | 11.35763700 | -3.63672300 | 2.32391400  |
| C | 11.35989700 | -1.39289200 | 4.29597100  |
| C | 11.35181200 | -0.03778700 | 4.57244400  |
| C | 11.26760100 | 0.24121200  | -3.90132300 |
| C | 11.25815800 | 1.59637100  | -3.62493400 |
| C | 11.25697300 | 3.83952300  | -1.65210400 |
| C | 11.26583600 | 4.28587500  | -0.34304800 |

|   |             |             |             |
|---|-------------|-------------|-------------|
| C | 11.30002600 | 3.70686100  | 2.58636900  |
| C | 11.31843600 | 2.79414100  | 3.62527200  |
| H | 12.24755000 | -2.28249500 | -3.39584700 |
| H | 12.27734300 | -3.88744100 | -1.56968700 |
| H | 12.29874900 | -4.30488900 | 0.53027600  |
| H | 12.31436300 | -3.52097100 | 2.83171700  |
| H | 12.31656800 | -1.91107700 | 4.24279300  |
| H | 12.30230900 | 0.47094400  | 4.72843300  |
| H | 12.22333800 | -0.25142900 | -4.07603600 |
| H | 12.20678700 | 2.13071600  | -3.59068400 |
| H | 12.20570900 | 3.73873700  | -2.17781200 |
| H | 12.22124500 | 4.52288900  | 0.12346400  |
| H | 12.24586600 | 4.10818100  | 2.22451000  |
| H | 12.27812600 | 2.50354400  | 4.05088100  |

**UP-6-(7,7)**

|   |             |             |             |
|---|-------------|-------------|-------------|
| C | -3.49737600 | 1.13539700  | -7.00420100 |
| C | -1.82491400 | -0.60284700 | -7.19906400 |
| C | -2.49872200 | 2.11386700  | -7.02341600 |
| H | -4.53927200 | 1.43490300  | -6.87894800 |
| C | -0.82344000 | 0.37744100  | -7.21254400 |
| H | -1.55839000 | -1.65778500 | -7.22303200 |
| H | -2.76009500 | 3.16444700  | -6.91426000 |
| H | 0.22390300  | 0.07249900  | -7.25171000 |
| C | 2.07458100  | 7.45719700  | -1.77568700 |
| C | 3.97836000  | 7.77316100  | -3.38140400 |
| C | 2.76231600  | 7.21158700  | -3.06346300 |
| C | 1.97183800  | 6.38796900  | -4.00311200 |
| C | 2.54077900  | 5.40580600  | -4.83170400 |
| C | -0.22561100 | 5.70062700  | -4.82094500 |
| C | 1.76685800  | 4.59327700  | -5.66991700 |
| H | 3.61196600  | 5.21801700  | -4.78217800 |
| H | -1.31142600 | 5.70928200  | -4.75803000 |
| H | 2.25556100  | 3.84146000  | -6.28482400 |
| C | -1.14493500 | 1.73966200  | -7.09522100 |
| C | 0.36912600  | 4.72701400  | -5.64451700 |



|   |             |             |             |
|---|-------------|-------------|-------------|
| C | -0.02166300 | 2.75238100  | -6.98684400 |
| H | 0.38124000  | 3.03263800  | -7.97825800 |
| H | 0.79722400  | 2.30203700  | -6.40375600 |
| O | -0.51210000 | 3.93099700  | -6.32921300 |
| C | 0.54842800  | 6.54531400  | -4.01205500 |
| C | -0.04657900 | 7.54921900  | -3.09738100 |
| C | -1.10728600 | 8.35150200  | -3.45780600 |
| S | -1.92860100 | 8.28797000  | -5.05742700 |
| S | -1.75030200 | 9.68346900  | -2.43366100 |
| C | -2.84011200 | 9.78065700  | -4.86388100 |
| H | -3.44160900 | 10.11039400 | -5.70862700 |
| C | -2.76018400 | 10.41174700 | -3.67683700 |
| H | -3.28751900 | 11.32766600 | -3.41781600 |
| S | 4.76085900  | 7.62340900  | -4.99427800 |
| C | 6.05014300  | 9.41683600  | -3.50188100 |
| H | 6.76993400  | 10.17403500 | -3.19737000 |
| S | 4.90771900  | 8.85580400  | -2.28611000 |
| C | 5.98506300  | 8.85965800  | -4.72630200 |
| H | 6.64371500  | 9.09853100  | -5.55887100 |
| C | 2.06817100  | 7.64291700  | 0.66587000  |
| C | 0.65815000  | 7.65988000  | -1.79889800 |
| C | 0.00117600  | 7.87309600  | -0.57261200 |
| H | -1.08365200 | 7.95490200  | -0.55169400 |
| C | 0.68367300  | 7.89240200  | 0.64958600  |
| H | 0.12835400  | 8.03749300  | 1.57309100  |
| C | 2.74844500  | 7.42771400  | -0.54634800 |
| H | 3.80224300  | 7.16188500  | -0.49507200 |
| O | 2.83389600  | 7.53724200  | 1.79318200  |
| C | 3.16057900  | 6.76894300  | 4.03734900  |
| H | 3.98420900  | 7.46682200  | 4.25473300  |
| H | 3.60075400  | 5.89765300  | 3.53161500  |
| C | 2.47521100  | 6.29499800  | 5.33050300  |
| H | 1.57348100  | 5.72669200  | 5.05274200  |
| H | 2.12980800  | 7.15518600  | 5.92833400  |
| C | 3.38068800  | 5.38171000  | 6.18004300  |
| H | 4.12791900  | 5.98125200  | 6.72717000  |

|   |             |             |             |
|---|-------------|-------------|-------------|
| H | 3.94625000  | 4.71885300  | 5.50623200  |
| C | 2.58010100  | 4.50546800  | 7.15582900  |
| H | 1.80082900  | 3.96973300  | 6.59213800  |
| H | 2.05571100  | 5.13672400  | 7.89393300  |
| C | 2.16851800  | 7.40403300  | 3.06583100  |
| H | 1.81822000  | 8.39317700  | 3.41100100  |
| H | 1.29095100  | 6.74773600  | 2.95540700  |
| C | 3.45931900  | 3.46666200  | 7.88681100  |
| O | -6.73047200 | -6.96231000 | 1.46968400  |
| C | -5.99599300 | -6.91872500 | 0.31781200  |
| C | -4.65719600 | -6.62952500 | -2.17395800 |
| C | -6.71573200 | -6.58826600 | -0.84550800 |
| H | -7.77284700 | -6.35379300 | -0.73725400 |
| C | -4.60895600 | -7.12955800 | 0.23588300  |
| H | -4.02335100 | -7.36208700 | 1.12249800  |
| C | -3.96307300 | -6.96102100 | -0.99590300 |
| H | -2.87667500 | -7.01609300 | -1.01003100 |
| C | -6.07791500 | -6.46472800 | -2.08741400 |
| C | -6.81037100 | -6.10936900 | -3.32271800 |
| C | -3.99511200 | -6.37136800 | -3.47544000 |
| C | -4.64607300 | -5.30577400 | -4.27620800 |
| C | -6.06976600 | -5.17696500 | -4.19784900 |
| C | -3.92259100 | -4.37897300 | -5.04313400 |
| H | -2.83579000 | -4.37531000 | -5.03750300 |
| C | -6.69085800 | -4.13086300 | -4.90221100 |
| H | -7.76149600 | -3.97020600 | -4.78684700 |
| C | -5.96729800 | -3.23460400 | -5.69756800 |
| H | -6.48989500 | -2.43201900 | -6.21211900 |
| C | -4.56840300 | -3.35242000 | -5.75401700 |
| O | -3.73455900 | -2.48304200 | -6.41001400 |
| C | -3.17159900 | -0.23186400 | -7.05988100 |
| C | -4.28428600 | -1.24632700 | -6.89010700 |
| C | -2.91665300 | -7.09841600 | -3.93519200 |
| C | -8.01758200 | -6.67412900 | -3.66607400 |
| S | -2.13926500 | -6.85868200 | -5.53990600 |
| S | -2.19601500 | -8.49107200 | -3.05380500 |

|   |              |             |             |
|---|--------------|-------------|-------------|
| S | -8.88316600  | -7.89446800 | -2.66682800 |
| S | -8.84660200  | -6.38765100 | -5.23732000 |
| C | -1.18381800  | -9.05731700 | -4.37603800 |
| H | -0.61052300  | -9.96728900 | -4.21078600 |
| C | -1.15900300  | -8.31854500 | -5.50167900 |
| H | -0.56269900  | -8.54145600 | -6.38417900 |
| C | -10.01134400 | -7.69836700 | -5.07655900 |
| H | -10.67621100 | -7.88146600 | -5.91833000 |
| C | -10.02672800 | -8.37930600 | -3.91464700 |
| H | -10.70651400 | -9.19539000 | -3.67766900 |
| H | -4.82426400  | -1.43062100 | -7.83817600 |
| H | -5.01128200  | -0.84945400 | -6.16215800 |
| H | 4.01497000   | 2.87623400  | 7.14117000  |
| H | 4.20710700   | 4.00382700  | 8.49861200  |
| C | -7.60035100  | -3.21233000 | 7.68976300  |
| H | -8.30933100  | -3.80542900 | 8.29092300  |
| C | -6.60823000  | -4.14948700 | 6.96376400  |
| H | -5.85365200  | -3.53537100 | 6.44777700  |
| H | -6.06412200  | -4.75898100 | 7.70396300  |
| C | -7.30688000  | -5.04610600 | 5.92920900  |
| H | -7.92713000  | -4.40430100 | 5.28381600  |
| H | -8.00116500  | -5.73891500 | 6.43471800  |
| C | -6.32965100  | -5.83195500 | 5.03488800  |
| H | -5.51737700  | -5.15543900 | 4.72448400  |
| H | -5.85672300  | -6.64907700 | 5.60537900  |
| C | -7.02368900  | -6.37179100 | 3.77143200  |
| H | -7.57662600  | -5.54584700 | 3.30088900  |
| H | -8.19131800  | -2.68657000 | 6.91919000  |
| C | -6.03245200  | -6.89527900 | 2.73194400  |
| H | -5.18457800  | -6.19815600 | 2.64384100  |
| H | -5.63387400  | -7.89140700 | 2.99392300  |
| H | -7.76082400  | -7.14937000 | 4.02633400  |
| H | 13.49080100  | 2.09739400  | -1.37087600 |
| H | 13.63529000  | 2.13234100  | 1.05174000  |
| H | 13.55618600  | 1.26030700  | 2.97638300  |
| H | 13.24831700  | -0.57439400 | 4.53518700  |

|   |             |             |             |
|---|-------------|-------------|-------------|
| H | 12.84322700 | -2.58385100 | 5.05560300  |
| H | 12.31306400 | -4.90372300 | 4.57854000  |
| H | 11.88516300 | -6.54050200 | 3.31039100  |
| H | 11.53253700 | -7.60271300 | 1.15655100  |
| H | 13.18497500 | 1.17089000  | -3.24644200 |
| H | 12.69696700 | -0.70644800 | -4.70551700 |
| H | 12.23637800 | -2.72790900 | -5.11974900 |
| H | 11.77091200 | -5.03329300 | -4.52078600 |
| H | 11.50013000 | -6.63276400 | -3.16385100 |
| H | 11.40747700 | -7.63214900 | -0.95398200 |
| C | 12.57691100 | 2.23874900  | -0.79557400 |
| C | 12.65929900 | 2.25860900  | 0.58525300  |
| C | 12.54731100 | 1.02455700  | 3.31210300  |
| C | 12.37187400 | -0.02125100 | 4.20055100  |
| C | 11.79803000 | -2.86704200 | 4.93953900  |
| C | 11.49582100 | -4.18937900 | 4.66756900  |
| C | 10.89044400 | -6.50648700 | 2.86823100  |
| C | 10.68940800 | -7.11194800 | 1.64071500  |
| C | 12.14375300 | 0.92772500  | -3.45352900 |
| C | 11.86560200 | -0.14235400 | -4.28506800 |
| C | 11.21284400 | -3.00633300 | -4.87277700 |
| C | 10.94752600 | -4.32051000 | -4.53141900 |
| C | 10.56451200 | -6.58519100 | -2.60842300 |
| C | 10.51172000 | -7.15483000 | -1.34883900 |
| C | 11.31234300 | 2.24311900  | -1.46045000 |
| C | 11.48259700 | 2.28396500  | 1.39515100  |
| C | 11.42836400 | 1.68549600  | 2.71841200  |
| C | 11.06538200 | -0.47725000 | 4.55604300  |
| C | 10.78702400 | -1.85778800 | 4.91478600  |
| C | 10.16201500 | -4.59283600 | 4.35208600  |
| C | 9.86833500  | -5.71655100 | 3.47858200  |
| C | 9.45268100  | -6.96858000 | 0.93978800  |
| C | 11.10220300 | 1.60724600  | -2.75021300 |
| C | 10.52687500 | -0.60585700 | -4.46992900 |
| C | 10.21023100 | -1.99531100 | -4.75513500 |
| C | 9.66135600  | -4.71334700 | -4.04899800 |

|   |             |             |             |
|---|-------------|-------------|-------------|
| C | 9.47551800  | -5.81200400 | -3.11593300 |
| C | 9.36640500  | -6.98972400 | -0.51074900 |
| C | 10.17092300 | 2.61327300  | -0.68468600 |
| C | 10.25643100 | 2.63340700  | 0.75009200  |
| C | 10.15113000 | 1.47117900  | 3.32198100  |
| C | 9.96891100  | 0.38475800  | 4.24550100  |
| C | 9.42797700  | -2.29804600 | 4.94333400  |
| C | 9.11397400  | -3.67193500 | 4.66030600  |
| C | 8.54348100  | -5.85501700 | 2.96144500  |
| C | 8.33459900  | -6.48396400 | 1.68591000  |
| C | 9.76257200  | 1.37810900  | -3.19123700 |
| C | 9.47359500  | 0.26611600  | -4.05509400 |
| C | 8.85815800  | -2.43406200 | -4.61002300 |
| C | 8.58242100  | -3.79957400 | -4.25539700 |
| C | 8.22150400  | -5.93431400 | -2.44194400 |
| C | 8.16673000  | -6.52564800 | -1.13289400 |
| C | 8.87714800  | 2.70026300  | -1.30538300 |
| C | 9.04512700  | 2.73944000  | 1.51702000  |
| C | 8.99222500  | 2.15364000  | 2.81413500  |
| C | 8.63391100  | 0.01734100  | 4.63181300  |
| C | 8.36123100  | -1.33533000 | 4.98388100  |
| C | 7.74354300  | -4.03773300 | 4.42625000  |
| C | 7.45585800  | -5.13787800 | 3.56909400  |
| C | 7.04515700  | -6.37442300 | 1.05966700  |
| C | 8.67121400  | 2.07751100  | -2.56944400 |
| C | 8.10260700  | -0.10984400 | -4.26880300 |
| C | 7.79235700  | -1.47128500 | -4.54871800 |
| C | 7.24999100  | -4.15730200 | -3.85121600 |
| C | 7.06794200  | -5.23367000 | -2.93678000 |
| C | 6.96044800  | -6.39569500 | -0.36164200 |
| C | 7.74568600  | 3.14023000  | -0.54681900 |
| C | 7.83093100  | 3.15916600  | 0.88552200  |
| C | 7.72553200  | 1.99542400  | 3.46193400  |
| C | 7.54385900  | 0.91192700  | 4.38493600  |
| C | 7.00245300  | -1.77445900 | 5.08458000  |
| C | 6.68895000  | -3.14532600 | 4.80093600  |

|   |            |             |             |
|---|------------|-------------|-------------|
| C | 6.11778100 | -5.32927400 | 3.09740500  |
| C | 5.90933400 | -5.95619500 | 1.82410600  |
| C | 7.33663700 | 1.90347200  | -3.05716000 |
| C | 7.04824600 | 0.79310100  | -3.91917500 |
| C | 6.43201000 | -1.91089900 | -4.47539700 |
| C | 6.15670800 | -3.27374400 | -4.12157000 |
| C | 5.79546400 | -5.41056400 | -2.30518400 |
| C | 5.74095700 | -5.99952000 | -0.99824500 |
| C | 6.46668200 | 3.24127300  | -1.17341400 |
| C | 6.63458800 | 3.27782300  | 1.65561000  |
| C | 6.58113900 | 2.68721300  | 2.96152100  |
| C | 6.22285300 | 0.54837900  | 4.78658400  |
| C | 5.94823400 | -0.81358300 | 5.14120400  |
| C | 5.32917600 | -3.52054900 | 4.58001300  |
| C | 5.03949300 | -4.62685500 | 3.71553900  |
| C | 4.62811800 | -5.86388400 | 1.20057300  |
| C | 6.25910500 | 2.61359900  | -2.44622500 |
| C | 5.68921600 | 0.42048700  | -4.14893300 |
| C | 5.37656200 | -0.95046500 | -4.43101600 |
| C | 4.83314700 | -3.64193600 | -3.73257400 |
| C | 4.64987100 | -4.72515100 | -2.81127100 |
| C | 4.54254100 | -5.88648200 | -0.23033600 |
| C | 5.33164400 | 3.67066100  | -0.40886800 |
| C | 5.41651400 | 3.68672500  | 1.01890700  |
| C | 5.31022700 | 2.51667200  | 3.60381000  |
| C | 5.12939300 | 1.43856900  | 4.52577000  |
| C | 4.58665000 | -1.25555600 | 5.22909300  |
| C | 4.27384800 | -2.62118700 | 4.94558200  |
| C | 3.70086500 | -4.80899700 | 3.23373800  |
| C | 3.49318800 | -5.43267600 | 1.96423500  |
| C | 4.92055800 | 2.42769800  | -2.92726500 |
| C | 4.63328700 | 1.32072500  | -3.78680800 |
| C | 4.01459500 | -1.39291700 | -4.34672100 |
| C | 3.73990700 | -2.75146100 | -3.99420500 |
| C | 3.37765900 | -4.89384900 | -2.17054600 |
| C | 3.32365900 | -5.47894800 | -0.86712100 |

|   |             |             |             |
|---|-------------|-------------|-------------|
| C | 4.04810300  | 3.76747800  | -1.03727800 |
| C | 4.21576300  | 3.79822800  | 1.79121000  |
| C | 4.16106000  | 3.20392200  | 3.09604400  |
| C | 3.80378900  | 1.07097700  | 4.92641100  |
| C | 3.52894700  | -0.29122800 | 5.28403000  |
| C | 2.90930600  | -2.99779100 | 4.72261100  |
| C | 2.61945300  | -4.10418500 | 3.85572500  |
| C | 2.20777700  | -5.34048000 | 1.33757900  |
| C | 3.83988400  | 3.13649800  | -2.31004600 |
| C | 3.27009900  | 0.94367200  | -4.01554200 |
| C | 2.95622100  | -0.42846300 | -4.30093200 |
| C | 2.41188700  | -3.12315700 | -3.60435800 |
| C | 2.22814300  | -4.20759000 | -2.68109100 |
| C | 2.12152500  | -5.36522100 | -0.09540300 |
| C | 2.91675800  | 4.18383300  | -0.27286800 |
| C | 3.00146800  | 4.19862400  | 1.15639800  |
| C | 2.89496600  | 3.03091900  | 3.73471800  |
| C | 2.71414900  | 1.95539500  | 4.66382700  |
| C | 2.17201800  | -0.73095100 | 5.37196400  |
| C | 1.85825100  | -2.10106700 | 5.08800200  |
| C | 1.28586700  | -4.28530400 | 3.37478600  |
| C | 1.07792500  | -4.91064500 | 2.10011100  |
| C | 2.50733600  | 2.94282800  | -2.78235200 |
| C | 2.21947000  | 1.83749200  | -3.64558800 |
| C | 1.59946200  | -0.86986900 | -4.21328100 |
| C | 1.32344300  | -2.23451700 | -3.86401100 |
| C | 0.96099300  | -4.37636600 | -2.04174200 |
| C | 0.90748800  | -4.95995200 | -0.73134100 |
| C | 1.63068000  | 4.26711200  | -0.89606500 |
| C | 1.79968900  | 4.30056600  | 1.92628000  |
| C | 1.74593500  | 3.71525800  | 3.22684200  |
| C | 1.38853400  | 1.58942800  | 5.06348000  |
| C | 1.11435000  | 0.23430900  | 5.42304600  |
| C | 0.49310200  | -2.47351500 | 4.85888100  |
| C | 0.20469700  | -3.57541300 | 3.99373800  |
| C | -0.20663500 | -4.81105400 | 1.47202900  |

|   |             |             |             |
|---|-------------|-------------|-------------|
| C | 1.42538900  | 3.64601000  | -2.16301300 |
| C | 0.85533400  | 1.46037800  | -3.86752900 |
| C | 0.54241900  | 0.09540800  | -4.14945300 |
| C | -0.00360300 | -2.60108800 | -3.46564000 |
| C | -0.18708900 | -3.68298100 | -2.54767900 |
| C | -0.29249700 | -4.83528800 | 0.04370400  |
| C | 0.49824500  | 4.68724800  | -0.13346300 |
| C | 0.58370500  | 4.70999700  | 1.29308900  |
| C | 0.47911200  | 3.55716900  | 3.87602700  |
| C | 0.29793600  | 2.48196400  | 4.80646200  |
| C | -0.24659400 | -0.20467200 | 5.51582800  |
| C | -0.56102200 | -1.57489400 | 5.22911500  |
| C | -1.13328300 | -3.75870600 | 3.51361800  |
| C | -1.33983100 | -4.38191300 | 2.23770100  |
| C | 0.09203300  | 3.46355000  | -2.64382800 |
| C | -0.19677300 | 2.36000900  | -3.50573900 |
| C | -0.81708100 | -0.34195600 | -4.05763500 |
| C | -1.09303500 | -1.70489600 | -3.71820800 |
| C | -1.45653600 | -3.84737900 | -1.90414500 |
| C | -1.50887200 | -4.42521800 | -0.59230200 |
| C | -0.77961100 | 4.78676400  | -0.75780500 |
| C | -0.61054600 | 4.83594200  | 2.06589300  |
| C | -0.66389000 | 4.25217400  | 3.37472600  |
| C | -1.02435400 | 2.12194700  | 5.20979000  |
| C | -1.30019600 | 0.76010800  | 5.56829900  |
| C | -1.92204600 | -1.94665000 | 5.00085400  |
| C | -2.21119400 | -3.05113300 | 4.13123700  |
| C | -2.61899700 | -4.27891500 | 1.60928400  |
| C | -0.98515600 | 4.17026000  | -2.03010300 |
| C | -1.55504400 | 1.99028600  | -3.73453700 |
| C | -1.86767600 | 0.62080400  | -4.00095400 |
| C | -2.41364800 | -2.06615300 | -3.31895900 |
| C | -2.59677600 | -3.14830200 | -2.40087300 |
| C | -2.70165500 | -4.29195100 | 0.17995000  |
| C | -1.91106500 | 5.22260800  | 0.00343800  |
| C | -1.82594800 | 5.24681000  | 1.42942600  |



|   |             |             |             |
|---|-------------|-------------|-------------|
| C | -1.93350200 | 4.08821500  | 4.01843800  |
| C | -2.11518900 | 3.01291900  | 4.94309300  |
| C | -2.66180300 | 0.32117000  | 5.65014800  |
| C | -2.97497600 | -1.04361100 | 5.36253300  |
| C | -3.54662800 | -3.22349500 | 3.64077100  |
| C | -3.75165700 | -3.84179200 | 2.36951100  |
| C | -2.31902700 | 3.99753600  | -2.51931100 |
| C | -2.60680800 | 2.89466200  | -3.38002600 |
| C | -3.22525900 | 0.18390300  | -3.91153400 |
| C | -3.50031200 | -1.17020600 | -3.56654300 |
| C | -3.86351700 | -3.30634100 | -1.75683000 |
| C | -3.91534500 | -3.87908000 | -0.45537500 |
| C | -3.19323500 | 5.33051800  | -0.62776000 |
| C | -3.02742400 | 5.36807200  | 2.20248300  |
| C | -3.08196200 | 4.78154100  | 3.51047800  |
| C | -3.44393100 | 2.64966200  | 5.34209300  |
| C | -3.72002100 | 1.28885900  | 5.69999200  |
| C | -4.34073500 | -1.41255600 | 5.12761000  |
| C | -4.62843900 | -2.50872700 | 4.25160400  |
| C | -5.03384400 | -3.73976600 | 1.73701900  |
| C | -3.40009100 | 4.71033200  | -1.90449700 |
| C | -3.97125900 | 2.51973000  | -3.60520700 |
| C | -4.28337300 | 1.14818900  | -3.87320300 |
| C | -4.82830000 | -1.54109700 | -3.18292100 |
| C | -5.01212900 | -2.62400200 | -2.26798800 |
| C | -5.11767000 | -3.76842600 | 0.31009500  |
| C | -4.32437000 | 5.75437400  | 0.13393600  |
| C | -4.24066600 | 5.77165900  | 1.56656700  |
| C | -4.34897100 | 4.61435900  | 4.14713000  |
| C | -4.53215900 | 3.53500800  | 5.07441800  |
| C | -5.07714100 | 0.85254500  | 5.77961400  |
| C | -5.39136200 | -0.51561100 | 5.48653800  |
| C | -5.95716600 | -2.67710800 | 3.75918400  |
| C | -6.16355600 | -3.30667500 | 2.49074000  |
| C | -4.73331600 | 4.52493500  | -2.38151000 |
| C | -5.02290000 | 3.41513600  | -3.24371000 |

|   |             |             |             |
|---|-------------|-------------|-------------|
| C | -5.63856400 | 0.70889400  | -3.79200500 |
| C | -5.91458400 | -0.65354000 | -3.43976300 |
| C | -6.27705700 | -2.79306400 | -1.63450500 |
| C | -6.32985100 | -3.37144300 | -0.32657700 |
| C | -5.61060300 | 5.84043100  | -0.48955500 |
| C | -5.44464500 | 5.87739400  | 2.33451500  |
| C | -5.49917500 | 5.29493200  | 3.63312200  |
| C | -5.86114100 | 3.16691700  | 5.46002500  |
| C | -6.13567100 | 1.81573200  | 5.81515700  |
| C | -6.75331500 | -0.87780500 | 5.23641500  |
| C | -7.03739100 | -1.96502900 | 4.36616000  |
| C | -7.44435200 | -3.21097000 | 1.86156300  |
| C | -5.81689000 | 5.22034900  | -1.75528300 |
| C | -6.38666500 | 3.03321300  | -3.45649200 |
| C | -6.69715700 | 1.67126800  | -3.73627300 |
| C | -7.23980000 | -1.02021200 | -3.04706700 |
| C | -7.42286600 | -2.10063400 | -2.13729100 |
| C | -7.52945700 | -3.24908100 | 0.44178200  |
| C | -6.75039100 | 6.27904900  | 0.26894500  |
| C | -6.66596800 | 6.29877800  | 1.70406700  |
| C | -6.77434000 | 5.14273900  | 4.27948200  |
| C | -6.95861200 | 4.06056300  | 5.20772700  |
| C | -7.50278400 | 1.38069400  | 5.90920600  |
| C | -7.81696900 | 0.00953200  | 5.61617500  |
| C | -8.38099300 | -2.15778600 | 3.89555900  |
| C | -8.58818400 | -2.79262700 | 2.62278700  |
| C | -7.15974000 | 5.04586800  | -2.23899200 |
| C | -7.44968000 | 3.93411600  | -3.10363000 |
| C | -8.06452500 | 1.23255100  | -3.66401300 |
| C | -8.34038700 | -0.13577800 | -3.31554400 |
| C | -8.70287800 | -2.27790000 | -1.50925000 |
| C | -8.75737900 | -2.86259300 | -0.19618300 |
| C | -8.01915500 | 6.43057600  | -0.37083500 |
| C | -7.85004300 | 6.47278900  | 2.48497100  |
| C | -7.90599800 | 5.87765300  | 3.80941200  |
| C | -8.27303300 | 3.72233900  | 5.65526700  |

|   |              |             |             |
|---|--------------|-------------|-------------|
| C | -8.55334300  | 2.34269600  | 6.01573000  |
| C | -9.17712000  | -0.38914200 | 5.43821000  |
| C | -9.46780000  | -1.50657500 | 4.55473900  |
| C | -9.88001100  | -2.76398200 | 2.01323500  |
| C | -8.23032900  | 5.79464300  | -1.66024200 |
| C | -8.80667000  | 3.58157100  | -3.38105400 |
| C | -9.12300100  | 2.19266400  | -3.67074800 |
| C | -9.67181800  | -0.53090000 | -2.97813500 |
| C | -9.85837700  | -1.63342100 | -2.04871600 |
| C | -9.96683100  | -2.79901400 | 0.56243400  |
| C | -9.09343100  | 6.93347800  | 0.42583600  |
| C | -9.01166900  | 6.95436000  | 1.80650000  |
| C | -9.12714100  | 5.72646200  | 4.53598600  |
| C | -9.30477200  | 4.68434100  | 5.42817600  |
| C | -9.88204700  | 1.83920600  | 6.16924200  |
| C | -10.18364300 | 0.51803500  | 5.89130400  |
| C | -10.78294100 | -1.79327100 | 4.07516700  |
| C | -10.98173600 | -2.39922300 | 2.84698900  |
| C | -9.52914600  | 5.61936600  | -2.22952700 |
| C | -9.80779200  | 4.54952900  | -3.06110700 |
| C | -10.45938500 | 1.68669400  | -3.66050700 |
| C | -10.72452900 | 0.37049800  | -3.32628500 |
| C | -11.10838400 | -1.89973000 | -1.40926400 |
| C | -11.16102700 | -2.46339700 | -0.14678100 |
| H | -10.03990900 | 7.19573400  | -0.04485900 |
| H | -9.89624500  | 7.23274000  | 2.37758200  |
| H | -9.97832100  | 6.36472100  | 4.30315400  |
| H | -10.28984200 | 4.53574400  | 5.86829200  |
| H | -10.69817600 | 2.52483500  | 6.39272500  |
| H | -11.22691200 | 0.20593100  | 5.90555900  |
| H | -11.65000700 | -1.42807900 | 4.62371900  |
| H | -11.99911100 | -2.49051400 | 2.46910500  |
| H | -10.34939000 | 6.26340500  | -1.91560100 |
| H | -10.83808700 | 4.38689400  | -3.37449800 |
| H | -11.29741800 | 2.36804800  | -3.80065700 |
| H | -11.76233600 | 0.05975500  | -3.21389200 |

|   |              |             |             |
|---|--------------|-------------|-------------|
| H | -12.03413000 | -1.54740000 | -1.86210400 |
| H | -12.12615800 | -2.53650400 | 0.35259700  |
| C | 2.64130400   | 2.54493600  | 8.75481500  |
| H | 2.07212700   | 3.02372800  | 9.56000800  |
| C | 2.53695000   | 1.22016200  | 8.57526400  |
| H | 3.08399100   | 0.71430500  | 7.77730500  |
| H | 1.90609600   | 0.60088700  | 9.21556800  |
| C | -6.90571300  | -2.19758400 | 8.55933000  |
| H | -6.20789300  | -1.53268800 | 8.03962000  |
| C | -7.06865100  | -2.07424900 | 9.88434200  |
| H | -7.75480600  | -2.72564000 | 10.43246800 |
| H | -6.52900400  | -1.32175300 | 10.46233400 |

**UP-8-(5,5)**

|   |            |             |             |
|---|------------|-------------|-------------|
| C | 7.57207000 | 0.35011200  | -4.88692400 |
| C | 5.68877700 | 1.84973700  | -5.12333600 |
| C | 6.72883800 | -0.75256100 | -5.06879200 |
| H | 8.63576700 | 0.18672100  | -4.70154400 |
| C | 4.84479900 | 0.74725100  | -5.30627200 |
| H | 5.28260000 | 2.85881200  | -5.13060400 |
| H | 7.12922600 | -1.76293600 | -5.01741200 |
| H | 3.77304100 | 0.90722800  | -5.43800300 |
| C | 2.67813000 | -6.75272900 | -0.53086900 |
| C | 1.03401200 | -7.49842200 | -2.27958600 |
| C | 2.08963800 | -6.70734800 | -1.89001000 |
| C | 2.80255300 | -5.78158000 | -2.79660300 |
| C | 2.15204800 | -4.94661800 | -3.72234900 |
| C | 4.91238300 | -4.71313900 | -3.41334700 |
| C | 2.85084300 | -4.01456000 | -4.50007200 |
| H | 1.06610300 | -4.96677100 | -3.79386000 |
| H | 5.96930100 | -4.52207900 | -3.24310400 |
| H | 2.30847200 | -3.36381200 | -5.18270200 |
| C | 5.35120400 | -0.56332600 | -5.26919600 |
| C | 4.23641100 | -3.87829200 | -4.31862800 |
| C | 4.38340800 | -1.72425400 | -5.39957300 |
| H | 4.06625400 | -1.86912800 | -6.44912200 |

|   |             |              |             |
|---|-------------|--------------|-------------|
| H | 3.48107500  | -1.50677100  | -4.80450600 |
| O | 5.01274600  | -2.92515900  | -4.92435600 |
| C | 4.22394700  | -5.67206200  | -2.65817100 |
| C | 4.89499300  | -6.51837600  | -1.64382300 |
| C | 6.11157300  | -7.12536500  | -1.86082300 |
| S | 7.06093500  | -6.97713200  | -3.38149100 |
| S | 6.87618000  | -8.27213400  | -0.70587000 |
| C | 8.20252100  | -8.26602600  | -3.01809700 |
| H | 8.93348800  | -8.51541500  | -3.78467400 |
| C | 8.11983900  | -8.85134000  | -1.80778100 |
| H | 8.77387200  | -9.64400800  | -1.44997700 |
| S | 0.38140700  | -7.54706400  | -3.95495100 |
| C | -0.69178900 | -9.49730000  | -2.48713000 |
| H | -1.28866500 | -10.36275800 | -2.20633600 |
| S | 0.23042900  | -8.70629600  | -1.21346000 |
| C | -0.62324800 | -8.97424000  | -3.72628000 |
| H | -1.15633000 | -9.35370200  | -4.59569400 |
| C | 2.45340500  | -6.74590500  | 1.90543600  |
| C | 4.09732800  | -6.69381500  | -0.41058900 |
| C | 4.65464300  | -6.70670000  | 0.88605200  |
| H | 5.72941300  | -6.59100500  | 1.01162700  |
| C | 3.85707300  | -6.74939400  | 2.02790600  |
| H | 4.29843000  | -6.69604100  | 3.02178900  |
| C | 1.87507600  | -6.77017600  | 0.62478900  |
| H | 0.79684500  | -6.72777700  | 0.50684700  |
| O | 1.75613100  | -6.64064300  | 3.07705600  |
| C | 1.39609400  | 6.33884600   | 0.84731800  |
| C | 2.94073400  | 6.57022900   | -1.52052900 |
| C | 2.80418300  | 6.34812100   | 0.90980600  |
| H | 3.26514000  | 6.18716600   | 1.88211300  |
| C | 0.75867600  | 6.41945400   | -0.40356400 |
| H | -0.32281000 | 6.37831600   | -0.49540200 |
| C | 1.53841200  | 6.49130700   | -1.56333700 |
| H | 1.03298300  | 6.45665700   | -2.52756500 |
| C | 3.58889600  | 6.50614300   | -0.24470000 |
| C | 5.06904000  | 6.60712600   | -0.21654800 |

|   |             |             |             |
|---|-------------|-------------|-------------|
| C | 3.77939800  | 6.70368000  | -2.72951200 |
| C | 5.06770500  | 5.98376100  | -2.64063100 |
| C | 5.74130900  | 5.97705000  | -1.37770300 |
| C | 5.63578100  | 5.30467400  | -3.73189100 |
| H | 5.09846700  | 5.22362000  | -4.67517000 |
| C | 6.99909100  | 5.34859700  | -1.30771600 |
| H | 7.51927200  | 5.28354500  | -0.35567000 |
| C | 7.59161500  | 4.73329600  | -2.41596000 |
| H | 8.56704000  | 4.26417300  | -2.30819500 |
| C | 6.89074300  | 4.68387600  | -3.62941700 |
| O | 7.38924800  | 4.10228100  | -4.77850300 |
| C | 7.06264400  | 1.65959000  | -4.90195900 |
| C | 8.02254000  | 2.81818200  | -4.67369900 |
| C | 3.46330200  | 7.53276500  | -3.78351400 |
| C | 5.74313600  | 7.33592700  | 0.74255300  |
| S | 4.53350900  | 7.81499300  | -5.20304300 |
| S | 2.00149500  | 8.58161400  | -3.83320000 |
| S | 4.94318200  | 8.21887000  | 2.09117900  |
| S | 7.51571700  | 7.64343600  | 0.71379500  |
| C | 2.52087300  | 9.56506400  | -5.19801100 |
| H | 1.87858300  | 10.39406700 | -5.48850700 |
| C | 3.66537300  | 9.21800400  | -5.81706800 |
| H | 4.08684300  | 9.72486900  | -6.68289500 |
| C | 7.51821900  | 8.89290600  | 1.95175100  |
| H | 8.46729700  | 9.37957200  | 2.16735100  |
| C | 6.35296300  | 9.15310900  | 2.57461200  |
| H | 6.21769200  | 9.88270100  | 3.37059600  |
| H | 8.80696000  | 2.81160100  | -5.44645600 |
| H | 8.52056500  | 2.69079900  | -3.69864400 |
| O | 0.74693300  | 6.19673000  | 2.04511700  |
| C | -0.69167300 | 6.24915500  | 2.02480900  |
| H | -1.08100300 | 5.54642700  | 1.27196100  |
| H | -1.01771500 | 7.26620300  | 1.74123600  |
| C | -1.23546400 | 5.84173300  | 3.38925500  |
| H | -0.84726900 | 6.51026900  | 4.17265600  |
| H | -0.87087700 | 4.82861700  | 3.61418200  |

|   |             |             |            |
|---|-------------|-------------|------------|
| C | -2.77913000 | 5.85012700  | 3.36116200 |
| H | -3.15190700 | 6.88253800  | 3.46930300 |
| H | -3.12138700 | 5.50021300  | 2.37306600 |
| C | -3.42577100 | 4.94209000  | 4.41985100 |
| H | -3.15575500 | 5.28178800  | 5.43448700 |
| H | -3.01197800 | 3.92690300  | 4.30860000 |
| C | -4.95498700 | 4.87795600  | 4.27109400 |
| H | -5.39464200 | 5.86488700  | 4.49815200 |
| H | -5.19759200 | 4.66744400  | 3.21567900 |
| C | -5.61660500 | 3.79740900  | 5.14016500 |
| H | -5.39349200 | 3.97525000  | 6.20622500 |
| H | -5.16869100 | 2.82246700  | 4.88765000 |
| C | -7.13946500 | 3.72114700  | 4.93036200 |
| H | -7.62958200 | 4.58998900  | 5.40009300 |
| H | -7.35814100 | 3.78571600  | 3.85188500 |
| C | 0.32199700  | -6.49707100 | 3.02442800 |
| H | 0.03284900  | -5.86507900 | 2.17323200 |
| H | -0.14204700 | -7.49056200 | 2.89116200 |
| C | -0.14872100 | -5.80871100 | 4.30159100 |
| H | 0.11774000  | -6.40907200 | 5.18529000 |
| H | 0.38468400  | -4.84953300 | 4.38247800 |
| C | -1.66558000 | -5.55094000 | 4.24810700 |
| H | -2.21523200 | -6.50220900 | 4.35099600 |
| H | -1.92755900 | -5.14807000 | 3.25483300 |
| C | -2.14857900 | -4.54496300 | 5.30394600 |
| H | -1.89467800 | -4.90129200 | 6.31675400 |
| H | -1.59609500 | -3.60279000 | 5.15770900 |
| C | -3.65985800 | -4.26547900 | 5.20227700 |
| H | -4.22799100 | -5.10338700 | 5.64148200 |
| H | -3.94576500 | -4.22209700 | 4.13913200 |
| C | -4.07472300 | -2.94431500 | 5.86723500 |
| H | -3.80217400 | -2.95937800 | 6.93713000 |
| H | -3.49654900 | -2.12354700 | 5.41118400 |
| C | -5.57419100 | -2.64482900 | 5.72172500 |
| H | -6.16373700 | -3.43170600 | 6.22105500 |
| H | -5.85038800 | -2.67586200 | 4.65557900 |

|   |              |             |             |
|---|--------------|-------------|-------------|
| C | -5.96470500  | -1.26950900 | 6.30712800  |
| H | -5.37604700  | -0.49595000 | 5.78224200  |
| H | -5.67823900  | -1.22755300 | 7.37129400  |
| C | -7.75187300  | 2.41504600  | 5.47952300  |
| H | -7.24511700  | 1.56902900  | 4.98283900  |
| H | -7.54144200  | 2.31132400  | 6.55552900  |
| C | -9.23350900  | 2.32066200  | 5.22962400  |
| H | -9.54584000  | 2.42977500  | 4.18681900  |
| C | -7.43474100  | -0.97506400 | 6.16151000  |
| H | -7.80882500  | -0.89737500 | 5.13621700  |
| C | -12.55102500 | -2.44740800 | 0.48854500  |
| C | -12.35268800 | -3.15287500 | -0.68336100 |
| C | -11.03392700 | -3.30990800 | -1.22364400 |
| C | -9.94341400  | -3.14185700 | -0.31822700 |
| C | -10.15056400 | -2.40734200 | 0.90486000  |
| C | -11.44076400 | -1.86257300 | 1.18174700  |
| C | -8.59340400  | -3.32540700 | -0.78124000 |
| C | -8.33073000  | -3.19291700 | -2.17651100 |
| C | -9.42893800  | -2.88377900 | -3.05285600 |
| C | -10.76598000 | -3.17648100 | -2.64741900 |
| C | -9.20654200  | -1.93470400 | -4.11474000 |
| C | -10.32845100 | -1.30895800 | -4.73697200 |
| C | -11.59261900 | -1.97256900 | -4.60776000 |
| C | -11.80586000 | -2.88247100 | -3.58943800 |
| C | -8.99575800  | -1.89846100 | 1.59505300  |
| C | -7.70801800  | -2.48379100 | 1.36158500  |
| C | -7.50073100  | -3.21697100 | 0.13993100  |
| C | -6.16510300  | -3.40795400 | -0.32727200 |
| C | -5.89986800  | -3.27424500 | -1.73525700 |
| C | -6.98403200  | -2.95575900 | -2.60724600 |
| C | -6.76189700  | -2.00733400 | -3.66734200 |
| C | -7.89878200  | -1.34796500 | -4.23938500 |
| C | -6.56913000  | -1.97562400 | 2.05500300  |
| C | -5.27527700  | -2.54385200 | 1.80307800  |
| C | -5.06923200  | -3.27652600 | 0.59055900  |
| C | -3.72729100  | -3.47298300 | 0.12347300  |



|   |             |             |             |
|---|-------------|-------------|-------------|
| C | -3.46160700 | -3.34119700 | -1.28541700 |
| C | -4.55204900 | -3.01643500 | -2.15878700 |
| C | -4.33103200 | -2.07218300 | -3.21236600 |
| C | -5.46677100 | -1.42216900 | -3.80315500 |
| C | -4.13249400 | -2.03292100 | 2.50102000  |
| C | -1.29614400 | -3.52635000 | 0.57158500  |
| C | -1.03134400 | -3.40106300 | -0.83068800 |
| C | -2.12074200 | -3.08828800 | -1.70997300 |
| C | -1.89810900 | -2.13799000 | -2.76867300 |
| C | -3.02816800 | -1.48731700 | -3.35281800 |
| C | -1.70412500 | -2.08816100 | 2.95148100  |
| C | -0.41342600 | -2.66260900 | 2.71174200  |
| C | -0.20428100 | -3.39322000 | 1.49184100  |
| C | 1.13159200  | -3.58461400 | 1.02832100  |
| C | 1.39651000  | -3.46584500 | -0.37927900 |
| C | 0.31553100  | -3.15265000 | -1.25601000 |
| C | 0.53816800  | -2.20016000 | -2.31192000 |
| C | -0.59657100 | -1.54583400 | -2.89648900 |
| C | 0.72271900  | -2.15832400 | 3.41459300  |
| C | 2.01462800  | -2.72733400 | 3.16394100  |
| C | 2.22135200  | -3.45134300 | 1.94817100  |
| C | 3.56169300  | -3.65042000 | 1.48350000  |
| C | 3.82685400  | -3.53350300 | 0.07842800  |
| C | 2.74081600  | -3.21054800 | -0.79947800 |
| C | 2.96136500  | -2.25797700 | -1.84004700 |
| C | 1.83164700  | -1.60935800 | -2.43495000 |
| C | 3.15906700  | -2.22322400 | 3.86847600  |
| C | 4.44354100  | -2.79261500 | 3.61745100  |
| C | 4.64848400  | -3.52580400 | 2.39787000  |
| C | 5.98845100  | -3.71418100 | 1.92978200  |
| C | 6.25102700  | -3.59322500 | 0.53329400  |
| C | 5.16449800  | -3.28501100 | -0.34460600 |
| C | 5.38704500  | -2.33035600 | -1.39562800 |
| C | 4.26172100  | -1.67214100 | -1.97037700 |
| C | 5.59210100  | -2.27336900 | 4.29987400  |
| C | 6.88801900  | -2.85139100 | 4.06303300  |

|   |             |             |             |
|---|-------------|-------------|-------------|
| C | 7.09145100  | -3.59614200 | 2.84527700  |
| C | 8.42232600  | -3.83867900 | 2.38937200  |
| C | 8.68994900  | -3.71339900 | 0.96347300  |
| C | 7.60487500  | -3.35427300 | 0.10897000  |
| C | 7.82842700  | -2.39997200 | -0.94842800 |
| C | 6.68385200  | -1.74064500 | -1.51874700 |
| C | 8.02173500  | -2.37207400 | 4.78596400  |
| C | 9.27230400  | -3.02504000 | 4.53294100  |
| C | 9.46705700  | -3.74006800 | 3.36568500  |
| C | 9.12943100  | -1.83814800 | -1.11927400 |
| C | 10.22607700 | -2.56769200 | -0.55489500 |
| C | 10.01187800 | -3.48274900 | 0.45958900  |
| C | 6.77662100  | -0.34991300 | -1.80943400 |
| C | 8.01022000  | 0.32731100  | -1.52064300 |
| C | 9.22426100  | -0.41522900 | -1.41805300 |
| C | 4.35827100  | -0.27531100 | -2.27340400 |
| C | 5.57472200  | 0.40446100  | -1.98100400 |
| C | 5.50671000  | 1.72690100  | -1.42706600 |
| C | 6.64226000  | 2.21227500  | -0.70806400 |
| C | 7.94008900  | 1.64768700  | -0.95325600 |
| C | 9.08627800  | 2.19430200  | -0.30225300 |
| C | 10.35229200 | 1.60936400  | -0.63141300 |
| C | 10.41897100 | 0.33741700  | -1.17395500 |
| C | 6.43464800  | 2.94164900  | 0.49387700  |
| C | 7.53761400  | 3.08770500  | 1.40329700  |
| C | 8.87560600  | 2.94802100  | 0.92627200  |
| C | 4.22637900  | 2.31204200  | -1.19589000 |
| C | 4.01493800  | 3.04030400  | 0.02491800  |
| C | 5.09624500  | 3.16527300  | 0.94653300  |
| C | 4.82925400  | 3.04062000  | 2.35538100  |
| C | 5.91865300  | 2.71212700  | 3.22800700  |
| C | 7.27227200  | 2.96894200  | 2.81340600  |
| C | 8.35447500  | 2.69794800  | 3.70289700  |
| C | 9.67061000  | 3.02260500  | 3.23594600  |
| C | 9.92459200  | 3.14635400  | 1.88254200  |
| C | 5.70127100  | 1.76915900  | 4.27501300  |

|   |             |             |             |
|---|-------------|-------------|-------------|
| C | 6.84548000  | 1.12365900  | 4.86317600  |
| C | 8.13233300  | 1.73460300  | 4.77075500  |
| C | 3.49015400  | 2.78516900  | 2.77596000  |
| C | 3.26997900  | 1.83757100  | 3.83666400  |
| C | 4.39934500  | 1.18766200  | 4.42041400  |
| C | 4.30761700  | -0.21676500 | 4.72403200  |
| C | 5.52325900  | -0.96441300 | 4.86091600  |
| C | 6.75429200  | -0.28356000 | 5.16183900  |
| C | 7.95222000  | -1.03528800 | 5.35710900  |
| C | 9.13124000  | -0.29491200 | 5.69779100  |
| C | 9.21875100  | 1.05497300  | 5.41293900  |
| C | 3.08949600  | -0.90275100 | 4.43500200  |
| C | 2.67004200  | 3.21957300  | 0.48903100  |
| C | 2.40287100  | 3.08604500  | 1.88877800  |
| C | 3.08384100  | 1.79903800  | -1.89686400 |
| C | 3.15058900  | 0.47837200  | -2.44354300 |
| C | 1.96963100  | 1.24423700  | 3.96792000  |
| C | 1.87674900  | -0.15137100 | 4.27504200  |
| C | 1.58314400  | 3.09880500  | -0.43568600 |
| C | 1.79285800  | 2.37601700  | -1.66034400 |
| C | 1.92898700  | -0.20822900 | -2.74944500 |
| C | 1.05864200  | 2.83347700  | 2.31267200  |
| C | 0.83462400  | 1.89577600  | 3.38104500  |
| C | 0.65122100  | -0.84006700 | 3.98779200  |
| C | 0.24576900  | 3.27926400  | 0.02860400  |
| C | -0.02160900 | 3.13359900  | 1.43081200  |
| C | 0.65467400  | 1.86522300  | -2.35904900 |
| C | 0.72333400  | 0.54070700  | -2.91745100 |
| C | -0.46039200 | 1.30924100  | 3.51897000  |
| C | -0.55503200 | -0.09204700 | 3.83045000  |
| C | -0.84567300 | 3.15744200  | -0.89280100 |
| C | -0.63848300 | 2.43461600  | -2.11136700 |
| C | -0.50242900 | -0.14906700 | -3.20474500 |
| C | -1.36717800 | 2.87840100  | 1.85113000  |
| C | -1.59209100 | 1.95112000  | 2.91661000  |
| C | -1.77709500 | -0.77874300 | 3.52542700  |

|   |             |             |             |
|---|-------------|-------------|-------------|
| C | -2.18769900 | 3.35306700  | -0.42786400 |
| C | -2.45431900 | 3.20765800  | 0.97862900  |
| C | -1.78354000 | 1.92599000  | -2.81076900 |
| C | -1.71420500 | 0.60169600  | -3.37088800 |
| C | -2.89487900 | 1.36976400  | 3.05615700  |
| C | -2.99000700 | -0.03014000 | 3.37046800  |
| C | -3.27636900 | 3.23376300  | -1.34547800 |
| C | -3.06924600 | 2.49999500  | -2.56649900 |
| C | -2.93393200 | -0.08399500 | -3.66142500 |
| C | -3.79536300 | 2.96134600  | 1.40250800  |
| C | -4.01970600 | 2.01667100  | 2.46214000  |
| C | -4.20563500 | -0.71588500 | 3.07153600  |
| C | -4.61877500 | 3.41921500  | -0.87551000 |
| C | -4.88264100 | 3.28202000  | 0.52527200  |
| C | -4.21609600 | 1.98366900  | -3.25623100 |
| C | -4.14703400 | 0.66671700  | -3.81415900 |
| C | -5.31970200 | 1.42793000  | 2.59153300  |
| C | -5.41507000 | 0.03505300  | 2.90522500  |
| C | -5.71402400 | 3.29896000  | -1.79586400 |
| C | -5.50764800 | 2.56296200  | -3.01502600 |
| C | -5.37254700 | -0.01983100 | -4.11128300 |
| C | -6.23037400 | 3.03496300  | 0.95210700  |
| C | -6.45239700 | 2.08132700  | 2.00537200  |
| C | -6.63907900 | -0.65284600 | 2.61591000  |
| C | -7.04961900 | 3.48881100  | -1.32842200 |
| C | -7.31405900 | 3.35400300  | 0.08028800  |
| C | -6.64756500 | 2.05212600  | -3.70580200 |
| C | -6.57808900 | 0.72858200  | -4.26797500 |
| C | -7.74557800 | 1.49564300  | 2.13875600  |
| C | -7.84220800 | 0.09648700  | 2.45406800  |
| C | -8.14494200 | 3.34551400  | -2.24169100 |
| C | -7.94051200 | 2.61573100  | -3.44951900 |
| C | -7.80541300 | 0.04169600  | -4.54449400 |
| C | -8.65836000 | 3.08499700  | 0.49822200  |
| C | -8.87677000 | 2.14055100  | 1.54307400  |
| C | -9.06402800 | -0.58732400 | 2.15164500  |

|   |              |             |             |
|---|--------------|-------------|-------------|
| C | -9.49394600  | 3.54195600  | -1.78107900 |
| C | -9.75842100  | 3.40810100  | -0.37043400 |
| C | -9.09341100  | 2.11315400  | -4.14813100 |
| C | -9.02368900  | 0.78846300  | -4.71211700 |
| C | -10.18686500 | 1.56371700  | 1.68502900  |
| C | -10.28288000 | 0.16004700  | 1.99802700  |
| C | -10.57929000 | 3.45849600  | -2.70424400 |
| C | -10.37049200 | 2.71519300  | -3.93746700 |
| C | -10.23328200 | 0.10907600  | -5.04780200 |
| C | -11.09899100 | 3.19664700  | 0.07224100  |
| C | -11.32203800 | 2.23866400  | 1.14444000  |
| C | -11.50973200 | -0.52597600 | 1.75232500  |
| C | -11.89151500 | 3.70728400  | -2.18305600 |
| C | -12.14485500 | 3.57982800  | -0.83020500 |
| C | -11.46546900 | 2.19150500  | -4.70034700 |
| C | -11.39853100 | 0.92144300  | -5.24147200 |
| C | -12.60036500 | 1.62708200  | 1.36202200  |
| C | -12.69175400 | 0.27982700  | 1.65721900  |
| C | -2.63904600  | -3.34203800 | 1.03947600  |
| C | -2.84652000  | -2.60180500 | 2.25565700  |
| H | 10.51007100  | 3.01090800  | 3.93047400  |
| H | 10.95731000  | 3.23005000  | 1.54524100  |
| H | 10.02443500  | -0.82176100 | 6.03210600  |
| H | 10.17882000  | 1.55689500  | 5.52921600  |
| H | 10.47093200  | -4.08638000 | 3.12177400  |
| H | 10.12756300  | -2.82758100 | 5.17844600  |
| H | 11.27349200  | 2.09015200  | -0.30340500 |
| H | 11.39131400  | -0.14732200 | -1.25788700 |
| H | 11.24933600  | -2.28755900 | -0.80375700 |
| H | 10.87197600  | -3.89975700 | 0.98250500  |
| H | -12.73048200 | 3.83669900  | -2.86604300 |
| H | -13.17669100 | 3.61209800  | -0.48186500 |
| H | -13.51147700 | 2.18024200  | 1.13634200  |
| H | -13.67256300 | -0.19463200 | 1.65591900  |
| H | -13.56875200 | -2.20150400 | 0.78997700  |
| H | -13.21940500 | -3.44527200 | -1.27531500 |

|   |              |             |             |
|---|--------------|-------------|-------------|
| H | -12.81686600 | -3.24815500 | -3.41264400 |
| H | -12.44110100 | -1.64429700 | -5.20728800 |
| H | -12.29847200 | 0.48434700  | -5.67296400 |
| H | -12.41644600 | 2.72292500  | -4.71925700 |
| C | -8.29317500  | -0.82832200 | 7.18098100  |
| H | -7.95494400  | -0.90007700 | 8.21861500  |
| C | -10.16871700 | 2.13419600  | 6.17251700  |
| H | -9.89554400  | 2.02372600  | 7.22471200  |
| H | -9.34833500  | -0.61340000 | 7.00994200  |
| H | -11.23030500 | 2.07950100  | 5.92285300  |

**UP-8-(6,6)**

|   |             |             |             |
|---|-------------|-------------|-------------|
| C | 0.70917200  | -0.77688800 | -7.01151500 |
| C | 3.04451400  | -0.15066800 | -6.89319500 |
| C | 0.33358200  | 0.54984300  | -6.74208100 |
| H | -0.06186300 | -1.53622600 | -7.15766900 |
| C | 2.67574100  | 1.16612200  | -6.61899200 |
| H | 4.09845000  | -0.42841700 | -6.92900800 |
| H | -0.71684500 | 0.82052300  | -6.65540100 |
| H | 3.44571200  | 1.91835500  | -6.43904900 |
| C | -3.17680700 | 7.15376800  | -1.82743400 |
| C | -1.78369900 | 8.88592500  | -2.98501900 |
| C | -2.14258400 | 7.57060800  | -2.79680700 |
| C | -1.63606600 | 6.45933800  | -3.62617700 |
| C | -0.28737600 | 6.34664700  | -4.00220600 |
| C | -2.05731200 | 4.34829000  | -4.77443200 |
| C | 0.18366000  | 5.29375000  | -4.79483900 |
| H | 0.43033800  | 7.08206500  | -3.64124700 |
| H | -2.68584800 | 3.49111800  | -5.00004400 |
| H | 1.23518500  | 5.26869800  | -5.06772200 |
| C | 1.31696700  | 1.53116500  | -6.54591100 |
| C | -0.71006300 | 4.27847000  | -5.17419400 |
| C | 1.01093000  | 2.98012600  | -6.23404900 |
| H | 1.24932800  | 3.63090200  | -7.09652000 |
| H | 1.66208100  | 3.28241500  | -5.39920300 |
| O | -0.36459000 | 3.15025300  | -5.88032600 |

|   |             |             |             |
|---|-------------|-------------|-------------|
| C | -2.55078900 | 5.43174700  | -4.02705800 |
| C | -3.96597000 | 5.54885000  | -3.58938700 |
| C | -5.02836100 | 5.16012500  | -4.38429400 |
| S | -4.86224200 | 4.42838200  | -6.01884600 |
| S | -6.75439700 | 5.43682100  | -3.96364400 |
| C | -6.56445200 | 4.50412200  | -6.44864400 |
| H | -6.84302600 | 4.15911100  | -7.44228800 |
| C | -7.42227800 | 4.95983100  | -5.51580900 |
| H | -8.50055800 | 5.03794600  | -5.63895600 |
| S | -0.67233400 | 9.44862800  | -4.28378600 |
| C | -1.86616200 | 11.52789100 | -3.11717700 |
| H | -2.16053600 | 12.55126100 | -2.89290100 |
| S | -2.48341400 | 10.26188200 | -2.06075500 |
| C | -1.04731400 | 11.16164300 | -4.12177600 |
| H | -0.58116300 | 11.84377400 | -4.82994500 |
| C | -4.24188200 | 7.26223500  | 0.37412800  |
| C | -4.13445000 | 6.18003300  | -2.25570300 |
| C | -5.15400100 | 5.82787900  | -1.34870300 |
| H | -5.87935300 | 5.06621300  | -1.62018000 |
| C | -5.22958500 | 6.36506200  | -0.06039000 |
| H | -6.02433200 | 6.05199300  | 0.61504500  |
| C | -3.22348300 | 7.64926300  | -0.51197600 |
| H | -2.44593500 | 8.31429300  | -0.14044600 |
| O | -4.25690100 | 7.82388100  | 1.62990000  |
| C | 2.75047200  | -6.95373700 | 1.09506700  |
| C | 3.83002400  | -6.54113700 | -1.49407200 |
| C | 1.92163500  | -7.00427800 | -0.03924400 |
| H | 0.85130900  | -7.09961700 | 0.12835800  |
| C | 4.12328600  | -6.69929100 | 0.94272700  |
| H | 4.77313700  | -6.61135400 | 1.81105600  |
| C | 4.63608300  | -6.47670600 | -0.34212600 |
| H | 5.67858300  | -6.17771800 | -0.43441300 |
| C | 2.43549600  | -6.82420000 | -1.33079300 |
| C | 1.57459700  | -6.83910900 | -2.53472800 |
| C | 4.33243000  | -6.26998300 | -2.86013800 |
| C | 3.36304300  | -5.55841600 | -3.72550500 |

|   |             |              |             |
|---|-------------|--------------|-------------|
| C | 1.96951000  | -5.85501100  | -3.56463900 |
| C | 3.75059200  | -4.60612600  | -4.67929400 |
| H | 4.78933500  | -4.29662100  | -4.76975400 |
| C | 1.04672200  | -5.15735000  | -4.36298500 |
| H | -0.01863100 | -5.27582000  | -4.17679400 |
| C | 1.44339500  | -4.23658600  | -5.34145800 |
| H | 0.68391000  | -3.69169000  | -5.89659800 |
| C | 2.81147800  | -3.97870800  | -5.52041000 |
| O | 3.35411400  | -3.13551600  | -6.45674400 |
| C | 2.06273700  | -1.13875200  | -7.09925300 |
| C | 2.50326100  | -2.54101500  | -7.46326700 |
| C | 5.54573600  | -6.73823800  | -3.31877500 |
| C | 0.55631900  | -7.75209600  | -2.71424700 |
| S | 6.14377700  | -6.54276300  | -5.00454600 |
| S | 6.65987600  | -7.75223200  | -2.33461000 |
| S | 0.13034800  | -9.03939200  | -1.53220100 |
| S | -0.41453700 | -7.88979200  | -4.22211700 |
| C | 7.69616200  | -8.24817100  | -3.66729000 |
| H | 8.49043300  | -8.95774600  | -3.44417400 |
| C | 7.46203600  | -7.70148700  | -4.87554900 |
| H | 8.03849200  | -7.90260700  | -5.77634000 |
| C | -1.15823300 | -9.43624700  | -3.83204200 |
| H | -1.80059800 | -9.88563100  | -4.58667900 |
| C | -0.91078300 | -9.95582600  | -2.61448300 |
| H | -1.32338500 | -10.88916100 | -2.23656300 |
| H | 3.14279900  | -2.50608800  | -8.35785900 |
| H | 1.64264700  | -3.18852900  | -7.68890300 |
| O | 2.10962600  | -7.10715500  | 2.29279200  |
| C | 2.68977800  | -6.50890200  | 3.47441400  |
| H | 3.18603800  | -5.56375800  | 3.20223600  |
| H | 3.44730700  | -7.18573700  | 3.90750900  |
| C | 1.52875000  | -6.24036800  | 4.43377900  |
| H | 1.13288000  | -7.19234600  | 4.82108000  |
| H | 0.72771500  | -5.78308200  | 3.83505500  |
| C | 1.87845600  | -5.28040400  | 5.58614100  |
| H | 2.56699900  | -5.75704700  | 6.30387700  |



|   |             |             |            |
|---|-------------|-------------|------------|
| H | 2.41103800  | -4.41078900 | 5.17028000 |
| C | 0.60724200  | -4.77713200 | 6.29924300 |
| H | 0.17178100  | -5.57966200 | 6.91860700 |
| H | -0.14337300 | -4.54502700 | 5.52577200 |
| C | 0.81839800  | -3.50215000 | 7.13671400 |
| H | 1.44137500  | -3.71349600 | 8.02198800 |
| H | 1.38506900  | -2.78369200 | 6.52387900 |
| C | -0.51722600 | -2.84956100 | 7.55251000 |
| H | -0.94025200 | -3.36247800 | 8.43295700 |
| H | -1.24320700 | -2.99376800 | 6.73533400 |
| C | -0.41589000 | -1.33761000 | 7.81776100 |
| H | 0.21260600  | -1.12762500 | 8.69848800 |
| H | 0.08655000  | -0.86493900 | 6.95915500 |
| C | -1.80745900 | -0.68717500 | 7.99922800 |
| H | -2.27862100 | -1.05256500 | 8.92654200 |
| H | -2.44416900 | -1.02429200 | 7.16137300 |
| C | -4.22595200 | 6.91654200  | 2.76092700 |
| H | -4.80469800 | 7.40925000  | 3.55679600 |
| H | -4.72058800 | 5.96347200  | 2.51094000 |
| C | -2.78177200 | 6.68207400  | 3.20989200 |
| H | -2.23511700 | 6.16928000  | 2.40273200 |
| H | -2.30364400 | 7.66503500  | 3.34964800 |
| C | -2.67131100 | 5.86284200  | 4.50832900 |
| H | -3.08522900 | 4.85455400  | 4.34659900 |
| H | -3.28172900 | 6.33051900  | 5.30062000 |
| C | -1.20918300 | 5.74861100  | 4.97491700 |
| H | -0.59489000 | 5.41674300  | 4.12351600 |
| H | -0.83547400 | 6.75014600  | 5.25025000 |
| C | -0.98526700 | 4.76773600  | 6.13743400 |
| H | -1.39870100 | 3.78862000  | 5.84974800 |
| H | -1.55144000 | 5.09190700  | 7.02738700 |
| C | 0.50889900  | 4.60042700  | 6.49108900 |
| H | 1.10413200  | 4.64084000  | 5.56425000 |
| H | 0.84795900  | 5.44685000  | 7.11259700 |
| C | 0.80663600  | 3.26900100  | 7.19682300 |
| H | 0.45720200  | 2.45109600  | 6.54866900 |

|   |              |             |             |
|---|--------------|-------------|-------------|
| H | 0.22844200   | 3.18418700  | 8.13016400  |
| C | 2.30479900   | 3.04577000  | 7.49847000  |
| H | 2.66302600   | 3.79244000  | 8.22633300  |
| H | 2.87054900   | 3.20876100  | 6.56398500  |
| H | -12.36038100 | 0.38642100  | 4.04439500  |
| H | -12.60686600 | 1.87053800  | 2.13493600  |
| H | -12.64677400 | 2.19208600  | 0.01889200  |
| H | -12.48370700 | 1.32203800  | -2.24504600 |
| H | -12.19424500 | -0.32674400 | -3.58101500 |
| H | -11.78411200 | -2.69523200 | -3.94352500 |
| H | -12.02130900 | -1.57264300 | 4.84375400  |
| H | -11.60701600 | -3.94067100 | 4.47826600  |
| H | -11.31647300 | -5.58363800 | 3.13623600  |
| H | -11.15609000 | -6.45571500 | 0.87272900  |
| H | -11.20105500 | -6.14434500 | -1.24580000 |
| H | -11.44894400 | -4.65820300 | -3.15373500 |
| C | -11.46622600 | 0.82332300  | 3.60150100  |
| C | -11.60634400 | 1.66720200  | 2.51463100  |
| C | -11.66253700 | 2.10696600  | -0.44006100 |
| C | -11.56966900 | 1.61260100  | -1.72849700 |
| C | -11.16532500 | -0.68430300 | -3.59406100 |
| C | -10.93204700 | -2.03188500 | -3.80010200 |
| C | -10.99485200 | -1.91024400 | 4.70594300  |
| C | -10.75920400 | -3.25699300 | 4.49784900  |
| C | -10.35301000 | -5.55073500 | 2.62908300  |
| C | -10.26173900 | -6.04681200 | 1.34126800  |
| C | -10.32395200 | -5.61364300 | -1.61412200 |
| C | -10.46490900 | -4.76831000 | -2.69966200 |
| C | -10.17359500 | 0.38118700  | 4.02628400  |
| C | -10.46264300 | 2.12130800  | 1.78508600  |
| C | -10.48917700 | 2.33252400  | 0.34653700  |
| C | -10.29779800 | 1.31322100  | -2.31112200 |
| C | -10.10124500 | 0.19629900  | -3.22111600 |
| C | -9.62036100  | -2.58191800 | -3.64549900 |
| C | -9.94370200  | -0.95054200 | 4.56213200  |
| C | -9.45820900  | -3.72658400 | 4.13246800  |

|   |             |             |             |
|---|-------------|-------------|-------------|
| C | -9.26063300 | -4.84295400 | 3.22261200  |
| C | -9.07224000 | -5.86698000 | 0.56724300  |
| C | -9.10230700 | -5.65696900 | -0.87096800 |
| C | -9.39300800 | -3.91392900 | -3.10925200 |
| C | -9.04875900 | 1.13018600  | 3.56441400  |
| C | -9.19487800 | 2.00654300  | 2.43272500  |
| C | -9.24593300 | 2.40969100  | -0.35264100 |
| C | -9.14923100 | 1.89668200  | -1.69413600 |
| C | -8.76899700 | -0.26220000 | -3.45617900 |
| C | -8.52612100 | -1.66419300 | -3.67038700 |
| C | -8.60463400 | -1.44654700 | 4.59619800  |
| C | -8.35972200 | -2.84712000 | 4.37757500  |
| C | -7.97714700 | -5.00736400 | 2.61792500  |
| C | -7.88202400 | -5.52460100 | 1.27883300  |
| C | -7.94000200 | -5.11927500 | -1.50363400 |
| C | -8.08648800 | -4.24022300 | -2.63302700 |
| C | -7.72329300 | 0.77490800  | 3.99600700  |
| C | -8.00879600 | 2.49001400  | 1.77969000  |
| C | -8.03369400 | 2.68839300  | 0.36867200  |
| C | -7.84496400 | 1.68414100  | -2.26123900 |
| C | -7.65212600 | 0.59228600  | -3.15612800 |
| C | -7.17660900 | -2.15278000 | -3.57552200 |
| C | -7.49759300 | -0.53203100 | 4.51606200  |
| C | -7.01815600 | -3.27450700 | 4.08566400  |
| C | -6.82461000 | -4.36871700 | 3.19400400  |
| C | -6.63787700 | -5.38418300 | 0.57176700  |
| C | -6.66688500 | -5.17959300 | -0.83778300 |
| C | -6.95382200 | -3.45783700 | -3.04925800 |
| C | -6.60144600 | 1.56654400  | 3.58913700  |
| C | -6.74839700 | 2.43935500  | 2.45770100  |
| C | -6.79578100 | 2.82191900  | -0.33773300 |
| C | -6.70037100 | 2.31712000  | -1.67958700 |
| C | -6.31935500 | 0.15943000  | -3.45427200 |
| C | -6.07617000 | -1.24054400 | -3.66754300 |
| C | -6.15476800 | -1.02111600 | 4.61468400  |
| C | -5.91063500 | -2.41972700 | 4.39317500  |

|   |             |             |             |
|---|-------------|-------------|-------------|
| C | -5.52727300 | -4.58792300 | 2.62855600  |
| C | -5.43179600 | -5.10667700 | 1.29230200  |
| C | -5.48912700 | -4.70272500 | -1.49870000 |
| C | -5.63526600 | -3.82474000 | -2.62650700 |
| C | -5.28834100 | 1.21353300  | 4.02606800  |
| C | -5.57663400 | 2.92579000  | 1.80477400  |
| C | -5.59876500 | 3.10151200  | 0.38361000  |
| C | -5.41042000 | 2.10820600  | -2.25105900 |
| C | -5.21628100 | 1.01585000  | -3.16026900 |
| C | -4.73858700 | -1.73420000 | -3.58228400 |
| C | -5.06101800 | -0.10535400 | 4.54608100  |
| C | -4.58116700 | -2.85645700 | 4.11057700  |
| C | -4.38590500 | -3.96031300 | 3.21280600  |
| C | -4.19797700 | -4.98271100 | 0.58482200  |
| C | -4.22670900 | -4.77805200 | -0.83621700 |
| C | -4.51391500 | -3.05020700 | -3.05254000 |
| C | -4.16307000 | 1.99687100  | 3.59957900  |
| C | -4.30952400 | 2.86718900  | 2.47459000  |
| C | -4.35869500 | 3.22238100  | -0.32124600 |
| C | -4.26347400 | 2.72223900  | -1.65189900 |
| C | -3.87934100 | 0.57628100  | -3.43873500 |
| C | -3.63705500 | -0.81684300 | -3.65439900 |
| C | -3.71600700 | -0.59943000 | 4.62361100  |
| C | -3.47349100 | -1.99266600 | 4.40306700  |
| C | -3.08904400 | -4.17034600 | 2.63636200  |
| C | -2.99299000 | -4.68960900 | 1.30629000  |
| C | -3.04936500 | -4.28677800 | -1.49308700 |
| C | -3.19499100 | -3.41018300 | -2.61521000 |
| C | -2.84426800 | 1.63837500  | 4.02905600  |
| C | -3.13766800 | 3.36076800  | 1.81306200  |
| C | -3.16593300 | 3.55343600  | 0.39259600  |
| C | -2.97021500 | 2.53067900  | -2.22881400 |
| C | -2.77343200 | 1.43712600  | -3.13622100 |
| C | -2.29421600 | -1.31192400 | -3.56853700 |
| C | -2.61827700 | 0.31884100  | 4.54863100  |
| C | -2.13979900 | -2.43205500 | 4.11760500  |

|   |             |             |             |
|---|-------------|-------------|-------------|
| C | -1.94386500 | -3.53938100 | 3.22317100  |
| C | -1.75399600 | -4.56821400 | 0.59562600  |
| C | -1.78233500 | -4.36505300 | -0.82714800 |
| C | -2.06948800 | -2.63064600 | -3.04121000 |
| C | -1.72522700 | 2.41144900  | 3.59142800  |
| C | -1.87415100 | 3.29384600  | 2.47217500  |
| C | -1.93798200 | 3.70164800  | -0.31893300 |
| C | -1.83741400 | 3.17361900  | -1.64816200 |
| C | -1.44285000 | 1.00110200  | -3.41057200 |
| C | -1.19983000 | -0.39567100 | -3.63204200 |
| C | -1.28142100 | -0.17463700 | 4.62208800  |
| C | -1.03840700 | -1.57001000 | 4.40464800  |
| C | -0.65353100 | -3.74421000 | 2.64685400  |
| C | -0.55566700 | -4.27022200 | 1.31439000  |
| C | -0.61142300 | -3.87082000 | -1.47934100 |
| C | -0.75817800 | -2.98650100 | -2.60079100 |
| C | -0.40599300 | 2.04858300  | 4.01232600  |
| C | -0.70272500 | 3.79020100  | 1.81232500  |
| C | -0.73582000 | 4.00690700  | 0.39955500  |
| C | -0.53966500 | 2.96467500  | -2.21546500 |
| C | -0.33970500 | 1.85733800  | -3.09390700 |
| C | 0.14152500  | -0.88750700 | -3.53040100 |
| C | -0.18236700 | 0.74050400  | 4.53881300  |
| C | 0.29466700  | -2.00280300 | 4.11492900  |
| C | 0.48875900  | -3.10022700 | 3.22406100  |
| C | 0.67936700  | -4.12923600 | 0.60425600  |
| C | 0.65223400  | -3.93212400 | -0.80941800 |
| C | 0.36471500  | -2.19600800 | -3.00845100 |
| C | 0.71541100  | 2.83212900  | 3.59128900  |
| C | 0.56548300  | 3.72154600  | 2.47640200  |
| C | 0.50203200  | 4.14631100  | -0.31133400 |
| C | 0.60026000  | 3.61573700  | -1.64106500 |
| C | 0.99405800  | 1.42130300  | -3.37160200 |
| C | 1.23886400  | 0.02894400  | -3.59528100 |
| C | 1.15951500  | 0.25043400  | 4.63165400  |
| C | 1.40190500  | -1.14561000 | 4.41659000  |

|   |            |             |             |
|---|------------|-------------|-------------|
| C | 1.78426400 | -3.30776000 | 2.65184100  |
| C | 1.88049100 | -3.82989200 | 1.32298800  |
| C | 1.82731400 | -3.44171500 | -1.46351600 |
| C | 1.68062200 | -2.55573500 | -2.57639100 |
| C | 2.02732000 | 2.47746600  | 4.02655900  |
| C | 1.73392100 | 4.22496600  | 1.82777200  |
| C | 1.70204900 | 4.44115300  | 0.40768200  |
| C | 1.89348000 | 3.40296200  | -2.20808300 |
| C | 2.09312900 | 2.28530100  | -3.08711700 |
| C | 2.57374400 | -0.46339000 | -3.51544000 |
| C | 2.25360400 | 1.16423000  | 4.55539100  |
| C | 2.73185400 | -1.58296700 | 4.13922300  |
| C | 2.92581600 | -2.68358000 | 3.23963900  |
| C | 3.11354600 | -3.70501800 | 0.61837800  |
| C | 3.08815100 | -3.51582300 | -0.80065300 |
| C | 2.79910800 | -1.78109000 | -3.00022400 |
| C | 3.14955700 | 3.26373000  | 3.60872600  |
| C | 3.00145700 | 4.14710900  | 2.49346100  |
| C | 2.94228500 | 4.56448200  | -0.30101200 |
| C | 3.03889800 | 4.03945100  | -1.62826300 |
| C | 3.42740000 | 1.84528500  | -3.36888000 |
| C | 3.67041200 | 0.45381100  | -3.58244600 |
| C | 3.59576700 | 0.67157700  | 4.64499700  |
| C | 3.83836000 | -0.72152400 | 4.43334500  |
| C | 4.22151900 | -2.89522700 | 2.66717100  |
| C | 4.31543700 | -3.41094800 | 1.33819300  |
| C | 4.26204300 | -3.02381000 | -1.45546200 |
| C | 4.11544800 | -2.14378400 | -2.57038000 |
| C | 4.46781200 | 2.90752500  | 4.04977500  |
| C | 4.17782900 | 4.64597200  | 1.84088500  |
| C | 4.14801000 | 4.85598200  | 0.42071200  |
| C | 4.33754600 | 3.82481100  | -2.20146700 |
| C | 4.53445000 | 2.71258200  | -3.08855500 |
| C | 5.01303900 | -0.04184400 | -3.51166300 |
| C | 4.69437900 | 1.59014800  | 4.57471700  |
| C | 5.17411800 | -1.16246200 | 4.15211400  |

|   |            |             |             |
|---|------------|-------------|-------------|
| C | 5.36911500 | -2.26800000 | 3.25693000  |
| C | 5.55671500 | -3.29687900 | 0.63060900  |
| C | 5.52928400 | -3.09987000 | -0.79118900 |
| C | 5.23941000 | -1.36389200 | -2.99748700 |
| C | 5.58759800 | 3.68627500  | 3.62791800  |
| C | 5.44014300 | 4.56900000  | 2.50392400  |
| C | 5.38273400 | 4.97830900  | -0.28592100 |
| C | 5.47931000 | 4.45430800  | -1.62021000 |
| C | 5.86365700 | 2.27235200  | -3.36886300 |
| C | 6.10678600 | 0.87205300  | -3.58424100 |
| C | 6.03189800 | 1.09717500  | 4.65658400  |
| C | 6.27582700 | -0.30203600 | 4.44037400  |
| C | 6.65910800 | -2.47827900 | 2.68362100  |
| C | 6.75482500 | -3.00382800 | 1.34925400  |
| C | 6.69953200 | -2.60796300 | -1.44380200 |
| C | 6.55180100 | -1.72333300 | -2.56688900 |
| C | 6.90661900 | 3.31851900  | 4.04871900  |
| C | 6.61770900 | 5.04903600  | 1.84473700  |
| C | 6.58887400 | 5.25452300  | 0.43532500  |
| C | 6.77773100 | 4.22821300  | -2.18182000 |
| C | 6.97188400 | 3.12722000  | -3.06527900 |
| C | 7.44865300 | 0.38016400  | -3.48761300 |
| C | 7.13108000 | 2.01066500  | 4.56727300  |
| C | 7.60861600 | -0.73422500 | 4.14300300  |
| C | 7.80225800 | -1.83307900 | 3.25680200  |
| C | 7.99106700 | -2.86440600 | 0.63949600  |
| C | 7.96269900 | -2.66345400 | -0.77121100 |
| C | 7.67302400 | -0.92988700 | -2.97321200 |
| C | 8.03828700 | 4.10400000  | 3.63617700  |
| C | 7.89076500 | 4.98756100  | 2.51053600  |
| C | 7.83393400 | 5.39202500  | -0.27110400 |
| C | 7.93046000 | 4.86782500  | -1.60743000 |
| C | 8.31321000 | 2.69541500  | -3.35316300 |
| C | 8.55639400 | 1.29358600  | -3.56881000 |
| C | 8.48082900 | 1.52263000  | 4.65891700  |
| C | 8.72467100 | 0.12151900  | 4.44168500  |

|   |             |             |             |
|---|-------------|-------------|-------------|
| C | 9.10723800  | -2.04909800 | 2.69291100  |
| C | 9.20352100  | -2.57580300 | 1.35727300  |
| C | 9.14702700  | -2.17568100 | -1.42510400 |
| C | 8.99911500  | -1.29016600 | -2.54962200 |
| C | 9.34534100  | 3.77597000  | 4.10968200  |
| C | 9.05284500  | 5.52684600  | 1.87904400  |
| C | 9.02370800  | 5.73515800  | 0.44070800  |
| C | 9.21490000  | 4.69690600  | -2.20845500 |
| C | 9.41263900  | 3.57457300  | -3.11109900 |
| C | 9.89490900  | 0.79574500  | -3.53745200 |
| C | 9.57427700  | 2.44121200  | 4.63777800  |
| C | 10.05723100 | -0.33668300 | 4.20810000  |
| C | 10.25494400 | -1.45856900 | 3.30496600  |
| C | 10.44604900 | -2.50022100 | 0.65693800  |
| C | 10.41670800 | -2.29284700 | -0.78165100 |
| C | 10.12367800 | -0.53963600 | -3.01030000 |
| C | 10.41630800 | 4.63376800  | 3.70458200  |
| C | 10.27444900 | 5.48307000  | 2.62243700  |
| C | 10.21458200 | 5.91041300  | -0.33249800 |
| C | 10.30723400 | 5.40679100  | -1.61719900 |
| C | 10.71345000 | 3.10182900  | -3.47311900 |
| C | 10.94721200 | 1.75444900  | -3.67972400 |
| C | 10.88647600 | 1.89167800  | 4.78933800  |
| C | 11.12065900 | 0.54470700  | 4.58072500  |
| C | 11.52721800 | -1.76119400 | 2.72503300  |
| C | 11.61973000 | -2.26620600 | 1.44084700  |
| C | 11.55921100 | -1.83835200 | -1.51307000 |
| C | 11.41708100 | -0.98777700 | -2.59422800 |
| H | 11.40011000 | 4.52342000  | 4.15901800  |
| H | 11.15071200 | 6.01664100  | 2.25629700  |
| H | 11.10868700 | 6.32045100  | 0.13547100  |
| H | 11.27163600 | 5.43544900  | -2.12285100 |
| H | 11.56245300 | 3.78403200  | -3.45315800 |
| H | 11.97347100 | 1.41565300  | -3.81623600 |
| H | 11.73799800 | 2.55526800  | 4.93455200  |
| H | 12.14965000 | 0.18752600  | 4.56821500  |



|   |             |             |             |
|---|-------------|-------------|-------------|
| H | 12.44095000 | -1.46561300 | 3.23913100  |
| H | 12.60364300 | -2.35275200 | 0.98143100  |
| H | 12.56046100 | -2.04602900 | -1.13759800 |
| H | 12.31060500 | -0.55079000 | -3.03840700 |
| C | -1.75674700 | 0.81726000  | 7.99742200  |
| H | -1.32897600 | 1.27068300  | 7.09963100  |
| C | -2.17384600 | 1.61384100  | 8.99164700  |
| H | -2.60128500 | 1.20124200  | 9.90942200  |
| H | -2.10297700 | 2.70052500  | 8.91779200  |
| C | 2.57054800  | 1.65318600  | 8.01013400  |
| H | 2.26190600  | 0.84117300  | 7.34449000  |
| C | 3.11446600  | 1.35346900  | 9.19813900  |
| H | 3.26663300  | 0.31974100  | 9.51432300  |
| H | 3.42668000  | 2.13823700  | 9.89238700  |

**UP-8-(7,7)**

|   |            |             |             |
|---|------------|-------------|-------------|
| C | 1.75471300 | -0.40201000 | -7.24947800 |
| C | 3.88940600 | -1.49575000 | -6.93348300 |
| C | 2.37885700 | 0.84868500  | -7.22834800 |
| H | 0.66801300 | -0.45605900 | -7.34204800 |
| C | 4.51444700 | -0.24149000 | -6.90283300 |
| H | 4.47110700 | -2.40216700 | -6.77563300 |
| H | 1.78209700 | 1.75562000  | -7.29602100 |
| H | 5.58842300 | -0.18397200 | -6.71727300 |
| C | 3.19610500 | 7.72165200  | -1.91191400 |
| C | 5.24820200 | 8.58811000  | -3.07274100 |
| C | 4.27443800 | 7.62462200  | -2.92026300 |
| C | 4.12274600 | 6.48524500  | -3.84977200 |
| C | 5.21126500 | 5.73630800  | -4.33070700 |
| C | 2.64542900 | 5.00639500  | -5.10747000 |
| C | 5.05169500 | 4.67283900  | -5.22840700 |
| H | 6.21306500 | 5.95646900  | -3.96513500 |
| H | 1.65933800 | 4.61411700  | -5.34116700 |
| H | 5.92497000 | 4.12477900  | -5.57412600 |
| C | 3.76312600 | 0.94222900  | -7.00937400 |
| C | 3.75368400 | 4.30314400  | -5.61309000 |

|   |             |             |             |
|---|-------------|-------------|-------------|
| C | 4.44174500  | 2.28040700  | -6.77580100 |
| H | 4.98911000  | 2.63547200  | -7.66880700 |
| H | 5.16802600  | 2.16414000  | -5.95585800 |
| O | 3.43790200  | 3.24526300  | -6.42371900 |
| C | 2.80124400  | 6.10609700  | -4.25070700 |
| C | 1.65386100  | 6.86125900  | -3.69450700 |
| C | 0.52087300  | 7.14642600  | -4.43151000 |
| S | 0.27248500  | 6.65696300  | -6.14575000 |
| S | -0.83549200 | 8.16879800  | -3.83879200 |
| C | -1.13625600 | 7.66859100  | -6.43708100 |
| H | -1.54658600 | 7.67230500  | -7.44492200 |
| C | -1.63854300 | 8.35360600  | -5.39230800 |
| H | -2.51681300 | 8.99511100  | -5.42633700 |
| S | 6.44797200  | 8.59172900  | -4.41489200 |
| C | 6.51225000  | 10.91538200 | -3.11026500 |
| H | 6.78318500  | 11.93248900 | -2.83395600 |
| S | 5.38153500  | 10.06898500 | -2.05931200 |
| C | 6.99542600  | 10.24755200 | -4.17523700 |
| H | 7.71533400  | 10.64335500 | -4.88885500 |
| C | 2.36543100  | 8.32904900  | 0.31720000  |
| C | 1.86898000  | 7.35701700  | -2.31519700 |
| C | 0.84501600  | 7.46649000  | -1.35896600 |
| H | -0.15255800 | 7.10786700  | -1.59774700 |
| C | 1.06580700  | 7.95034400  | -0.06343700 |
| H | 0.23303500  | 7.98503800  | 0.63456900  |
| C | 3.42346800  | 8.15997500  | -0.59894000 |
| H | 4.43240200  | 8.36798400  | -0.24819500 |
| O | 2.71730000  | 8.86997600  | 1.52537900  |
| C | 0.93267900  | -8.01497500 | 0.78677000  |
| C | 2.26179400  | -7.76370800 | -1.71207900 |
| C | 0.19557900  | -7.94844000 | -0.40963600 |
| H | -0.88867300 | -7.89738800 | -0.33539200 |
| C | 2.33876200  | -7.99437400 | 0.73437500  |
| H | 2.93493600  | -8.02231700 | 1.64280500  |
| C | 2.97582400  | -7.84303200 | -0.50211200 |
| H | 4.05507200  | -7.70634300 | -0.50417900 |

|   |             |              |             |
|---|-------------|--------------|-------------|
| C | 0.83496700  | -7.85505100  | -1.65499500 |
| C | 0.08500200  | -7.77686000  | -2.92929100 |
| C | 2.90022800  | -7.49830200  | -3.02207400 |
| C | 2.08374700  | -6.64881400  | -3.92248800 |
| C | 0.66103700  | -6.81583400  | -3.89381200 |
| C | 2.63819100  | -5.65805700  | -4.74755100 |
| H | 3.69798900  | -5.41926600  | -4.69405900 |
| C | -0.11988500 | -6.01228000  | -4.74134800 |
| H | -1.20540300 | -6.07303300  | -4.68896000 |
| C | 0.44312000  | -5.06421000  | -5.60475300 |
| H | -0.21373300 | -4.46993800  | -6.23467300 |
| C | 1.83243000  | -4.85717400  | -5.57886000 |
| O | 2.49855400  | -3.87114900  | -6.26501400 |
| C | 2.49350500  | -1.58370400  | -7.06819000 |
| C | 1.72326200  | -2.88450800  | -6.96275200 |
| C | 4.10310100  | -8.04942500  | -3.40878100 |
| C | -0.98578200 | -8.59523300  | -3.21280000 |
| S | 4.85948900  | -7.80050900  | -5.02225400 |
| S | 5.03874900  | -9.21755900  | -2.41079300 |
| S | -1.63397800 | -9.83409000  | -2.08098900 |
| S | -1.81341100 | -8.65221800  | -4.80888700 |
| C | 6.15339300  | -9.70695600  | -3.68107700 |
| H | 6.86908600  | -10.49094300 | -3.44185600 |
| C | 6.07152200  | -9.06612900  | -4.86274100 |
| H | 6.71109400  | -9.25486800  | -5.72265700 |
| C | -2.73042200 | -10.12170700 | -4.49543500 |
| H | -3.33640200 | -10.51487800 | -5.30922000 |
| C | -2.64788600 | -10.65566900 | -3.26177700 |
| H | -3.17773300 | -11.54625500 | -2.92965500 |
| H | 1.44430900  | -3.28155100  | -7.95679300 |
| H | 0.79389000  | -2.67229800  | -6.41129100 |
| O | 0.19416700  | -8.03894400  | 1.93818000  |
| C | 0.87742900  | -7.75829300  | 3.17810300  |
| H | 1.58019900  | -6.92481000  | 3.02396300  |
| H | 1.45887700  | -8.64297600  | 3.49392400  |
| C | -0.16195000 | -7.35209000  | 4.22131300  |

|   |             |             |            |
|---|-------------|-------------|------------|
| H | -0.80347200 | -8.20775700 | 4.48263200 |
| H | -0.80811700 | -6.59120800 | 3.76034700 |
| C | 0.51220800  | -6.74961500 | 5.47218600 |
| H | 0.96438400  | -7.54326700 | 6.09012100 |
| H | 1.34221000  | -6.10492400 | 5.13979200 |
| C | -0.44393000 | -5.88237900 | 6.31485200 |
| H | -1.15656400 | -6.51545100 | 6.86989400 |
| H | -1.04511600 | -5.26947700 | 5.62522300 |
| C | 0.29893200  | -4.92893100 | 7.27079000 |
| H | 0.76344700  | -5.49118600 | 8.09866600 |
| H | 1.12667000  | -4.46544600 | 6.71019000 |
| C | -0.59619500 | -3.80284600 | 7.82297000 |
| H | -1.27684500 | -4.19414700 | 8.59847400 |
| H | -1.23732900 | -3.43190400 | 7.00736000 |
| C | 0.21013800  | -2.61620700 | 8.37696800 |
| H | 0.79859900  | -2.93207300 | 9.25568600 |
| H | 0.93582200  | -2.29099800 | 7.61516700 |
| C | -0.68554100 | -1.41378100 | 8.75302700 |
| H | -1.38809300 | -1.73290200 | 9.54463600 |
| H | -1.29375300 | -1.12934400 | 7.88000100 |
| C | 1.68415400  | 9.05766500  | 2.51608700 |
| H | 2.07475600  | 9.84052200  | 3.18096400 |
| H | 0.76845800  | 9.44881000  | 2.04045100 |
| C | 1.40411400  | 7.76634100  | 3.29113400 |
| H | 1.37374300  | 6.93301700  | 2.57868400 |
| H | 2.24717700  | 7.56704100  | 3.97167600 |
| C | 0.07610900  | 7.79620600  | 4.07195800 |
| H | -0.75720500 | 7.70719100  | 3.35330600 |
| H | -0.05514300 | 8.76645400  | 4.58228000 |
| C | -0.00554900 | 6.65192800  | 5.10078500 |
| H | 0.43983800  | 5.74912300  | 4.66163200 |
| H | 0.61887400  | 6.90431100  | 5.97506900 |
| C | -1.43374500 | 6.31286100  | 5.55638100 |
| H | -2.02620200 | 6.02405100  | 4.67215100 |
| H | -1.92177900 | 7.20745500  | 5.98151700 |
| C | -1.46905800 | 5.16534200  | 6.58095500 |

|   |             |             |             |
|---|-------------|-------------|-------------|
| H | -0.88782100 | 4.31629900  | 6.18844600  |
| H | -0.96099700 | 5.48238400  | 7.50857300  |
| C | -2.89053500 | 4.68347300  | 6.91098600  |
| H | -3.40794000 | 4.40546700  | 5.98055700  |
| H | -3.47090900 | 5.50999400  | 7.35691600  |
| C | -2.89463000 | 3.47384300  | 7.87209900  |
| H | -2.37948100 | 3.76964500  | 8.80488900  |
| H | -2.30545800 | 2.65393000  | 7.43340100  |
| C | -4.28511700 | 2.98719400  | 8.19061600  |
| C | 0.11388700  | -0.22525700 | 9.22276200  |
| H | 0.73642100  | -0.38763200 | 10.11028700 |
| H | -4.97622300 | 3.74305800  | 8.58178900  |
| H | 11.77231200 | -2.38414600 | -3.01008300 |
| H | 11.89594600 | 0.01540300  | -3.34694800 |
| H | 11.90983800 | 2.03326100  | -2.72163900 |
| H | 11.81309600 | 3.81456800  | -1.07662100 |
| H | 11.64533500 | 4.58650800  | 0.88680100  |
| H | 11.39672200 | 4.38857200  | 3.29311800  |
| H | 11.17587000 | 3.31700000  | 5.10086800  |
| H | 10.96917400 | 1.30418400  | 6.44105700  |
| H | 11.59028300 | -4.14103700 | -1.85018000 |
| H | 11.33731100 | -5.36858800 | 0.22799400  |
| H | 11.12281600 | -5.53404600 | 2.32462900  |
| H | 10.93292800 | -4.65213700 | 4.57782700  |
| H | 10.84937100 | -3.10278200 | 6.01332900  |
| H | 10.86379400 | -0.78626400 | 6.73657100  |
| C | 10.84413800 | -1.82344300 | -3.11137700 |
| C | 10.91465500 | -0.45505800 | -3.30338100 |
| C | 10.93399000 | 2.40594600  | -2.41343000 |
| C | 10.87891500 | 3.42194100  | -1.47579100 |
| C | 10.64184000 | 4.51209100  | 1.30351900  |
| C | 10.50013200 | 4.39886200  | 2.67496700  |
| C | 10.18762600 | 2.88004200  | 5.23701500  |
| C | 10.06984800 | 1.73274800  | 6.00097900  |
| C | 10.58638300 | -4.31117300 | -1.46360500 |
| C | 10.44224600 | -5.01096900 | -0.27907100 |

|   |             |             |             |
|---|-------------|-------------|-------------|
| C | 10.13856800 | -5.24521500 | 2.69072200  |
| C | 10.03042800 | -4.74252300 | 3.97495900  |
| C | 9.91115900  | -2.54973900 | 6.01143900  |
| C | 9.91942000  | -1.22923300 | 6.42352700  |
| C | 9.59238200  | -2.47615100 | -2.89155900 |
| C | 9.73831800  | 0.35555900  | -3.28858700 |
| C | 9.74789000  | 1.74407000  | -2.85670300 |
| C | 9.63405400  | 3.84640400  | -0.91773700 |
| C | 9.51870600  | 4.37565400  | 0.43113700  |
| C | 9.22569600  | 4.13990900  | 3.26677800  |
| C | 9.07416000  | 3.40135900  | 4.50923700  |
| C | 8.83011800  | 1.02833700  | 6.09014200  |
| C | 9.46710400  | -3.68388900 | -2.09232300 |
| C | 9.16881300  | -5.13019400 | 0.35801300  |
| C | 9.02163900  | -5.24313400 | 1.79957200  |
| C | 8.79776600  | -4.20316900 | 4.45589800  |
| C | 8.73977000  | -3.13973900 | 5.44470500  |
| C | 8.75689300  | -0.40828900 | 6.29686800  |
| C | 8.41010900  | -1.74054900 | -3.21292500 |
| C | 8.48361400  | -0.31762200 | -3.41102500 |
| C | 8.50216200  | 2.38278500  | -2.57016000 |
| C | 8.44489500  | 3.44107100  | -1.59807700 |
| C | 8.22112800  | 4.46894800  | 1.02239500  |
| C | 8.07369900  | 4.34774000  | 2.44736700  |
| C | 7.77927600  | 2.91097700  | 4.86212100  |
| C | 7.65679200  | 1.71930300  | 5.65690300  |
| C | 8.16705200  | -4.08824000 | -1.65873900 |
| C | 8.01709400  | -4.81462600 | -0.42666800 |
| C | 7.73092700  | -5.03358200 | 2.37553300  |
| C | 7.61829800  | -4.51107300 | 3.71043600  |
| C | 7.50539100  | -2.44524900 | 5.63375600  |
| C | 7.51406400  | -1.07291100 | 6.06162900  |
| C | 7.11971400  | -2.36009800 | -3.07553000 |
| C | 7.26345800  | 0.44118100  | -3.46171600 |
| C | 7.27277700  | 1.80204500  | -3.03718500 |
| C | 7.16128700  | 3.88653800  | -1.12734900 |

|   |            |             |             |
|---|------------|-------------|-------------|
| C | 7.04798800 | 4.40618800  | 0.19427700  |
| C | 6.75765300 | 4.16372900  | 2.99648000  |
| C | 6.60947800 | 3.43781000  | 4.21332300  |
| C | 6.36820100 | 1.09399500  | 5.78017900  |
| C | 6.99697800 | -3.54437600 | -2.29266100 |
| C | 6.70196200 | -4.97119400 | 0.13272000  |
| C | 6.55791900 | -5.08053000 | 1.54586700  |
| C | 6.33616000 | -4.05373300 | 4.17343200  |
| C | 6.27876600 | -3.01286400 | 5.14395600  |
| C | 6.29585400 | -0.31339800 | 5.98601800  |
| C | 5.93892000 | -1.64786900 | -3.45988700 |
| C | 6.01189400 | -0.22713600 | -3.64814800 |
| C | 6.03187800 | 2.47535200  | -2.80733200 |
| C | 5.97498300 | 3.53671100  | -1.84541900 |
| C | 5.74972600 | 4.56830300  | 0.77530100  |
| C | 5.60228500 | 4.44076700  | 2.19748300  |
| C | 5.30785500 | 2.99874700  | 4.61638400  |
| C | 5.18508300 | 1.81146500  | 5.41316600  |
| C | 5.69585200 | -3.99850400 | -1.90492100 |
| C | 5.54603200 | -4.72061200 | -0.67383100 |
| C | 5.25976200 | -4.93853700 | 2.13281300  |
| C | 5.14670600 | -4.41946200 | 3.46599000  |
| C | 5.03268900 | -2.35354400 | 5.39546400  |
| C | 5.04130600 | -0.98399600 | 5.82361500  |
| C | 4.66096700 | -2.26877500 | -3.32808200 |
| C | 4.80487000 | 0.53140900  | -3.69729200 |
| C | 4.81603700 | 1.89894200  | -3.27870200 |
| C | 4.70453800 | 3.99395800  | -1.38426700 |
| C | 4.58988500 | 4.51674900  | -0.05576300 |
| C | 4.29828200 | 4.26502700  | 2.75179600  |
| C | 4.14909000 | 3.53464100  | 3.97725400  |
| C | 3.90675500 | 1.19152800  | 5.55729900  |
| C | 4.53778900 | -3.45936500 | -2.54048600 |
| C | 4.24382500 | -4.88279300 | -0.11488200 |
| C | 4.09875800 | -4.99521500 | 1.30528600  |
| C | 3.87503100 | -3.97341200 | 3.93766600  |

|   |            |             |             |
|---|------------|-------------|-------------|
| C | 3.81624800 | -2.92810900 | 4.91725700  |
| C | 3.83328700 | -0.22511800 | 5.76614300  |
| C | 3.47808800 | -1.54504000 | -3.68594000 |
| C | 3.55067400 | -0.13548800 | -3.87117600 |
| C | 3.57377700 | 2.57411800  | -3.05365500 |
| C | 3.51755000 | 3.63146300  | -2.09925400 |
| C | 3.28821900 | 4.65588000  | 0.52856400  |
| C | 3.14222400 | 4.52302900  | 1.94380000  |
| C | 2.84708000 | 3.08245000  | 4.37356800  |
| C | 2.72348200 | 1.90497600  | 5.17444800  |
| C | 3.23474600 | -3.89223900 | -2.13223400 |
| C | 3.08635200 | -4.61365800 | -0.91462100 |
| C | 2.80010700 | -4.83635500 | 1.88840000  |
| C | 2.68698400 | -4.32183300 | 3.21454200  |
| C | 2.57026300 | -2.25777700 | 5.15355000  |
| C | 2.57816600 | -0.89605400 | 5.58681100  |
| C | 2.19735500 | -2.16645600 | -3.55647800 |
| C | 2.34584000 | 0.62863400  | -3.94769100 |
| C | 2.35802400 | 1.99970800  | -3.54143200 |
| C | 2.24215600 | 4.08490000  | -1.63788900 |
| C | 2.12623800 | 4.59072300  | -0.30422600 |
| C | 1.83625700 | 4.33404200  | 2.49684800  |
| C | 1.68607800 | 3.61047900  | 3.72364400  |
| C | 1.44107900 | 1.28198800  | 5.31532300  |
| C | 2.07274000 | -3.35291900 | -2.76977400 |
| C | 1.78037400 | -4.78885000 | -0.35899300 |
| C | 1.63488800 | -4.90283600 | 1.05854200  |
| C | 1.41021700 | -3.87322200 | 3.68338600  |
| C | 1.35180100 | -2.82878700 | 4.66193300  |
| C | 1.36709900 | -0.13416400 | 5.52409100  |
| C | 1.02302300 | -1.45064900 | -3.93170200 |
| C | 1.09795700 | -0.03626100 | -4.13406800 |
| C | 1.11986000 | 2.67600800  | -3.32653900 |
| C | 1.06102800 | 3.72813400  | -2.35634000 |
| C | 0.83117000 | 4.71891300  | 0.27820900  |
| C | 0.68423400 | 4.59319900  | 1.69408500  |



|   |             |             |             |
|---|-------------|-------------|-------------|
| C | 0.38776600  | 3.16214100  | 4.11379900  |
| C | 0.26335400  | 1.98974500  | 4.92510200  |
| C | 0.77743600  | -3.79943300 | -2.37739200 |
| C | 0.62912900  | -4.53249500 | -1.15913700 |
| C | 0.34083200  | -4.75728200 | 1.64115500  |
| C | 0.22849800  | -4.22863800 | 2.96647700  |
| C | 0.11125800  | -2.16423600 | 4.89758600  |
| C | 0.11889200  | -0.80184300 | 5.33637000  |
| C | -0.25852400 | -2.07499700 | -3.80439600 |
| C | -0.10925300 | 0.72764200  | -4.21953300 |
| C | -0.09911600 | 2.09837900  | -3.81155100 |
| C | -0.21701400 | 4.16976200  | -1.88688000 |
| C | -0.33323200 | 4.66389800  | -0.55273200 |
| C | -0.62369200 | 4.42573400  | 2.25097900  |
| C | -0.77311500 | 3.69523600  | 3.46698900  |
| C | -1.02024800 | 1.36861000  | 5.05825500  |
| C | -0.38229800 | -3.25860500 | -3.01599100 |
| C | -0.67801400 | -4.71168700 | -0.60428400 |
| C | -0.82401200 | -4.82566700 | 0.81207900  |
| C | -1.04805700 | -3.78002600 | 3.43410700  |
| C | -1.10631300 | -2.73660300 | 4.40685400  |
| C | -1.09307900 | -0.04219500 | 5.26778800  |
| C | -1.43738800 | -1.36205200 | -4.19791000 |
| C | -1.36199700 | 0.05626200  | -4.40797400 |
| C | -1.34469700 | 2.77095400  | -3.58584200 |
| C | -1.40402400 | 3.82190400  | -2.61043500 |
| C | -1.63092600 | 4.82634900  | 0.02943400  |
| C | -1.77832500 | 4.70583200  | 1.45136800  |
| C | -2.07500000 | 3.26052900  | 3.86852200  |
| C | -2.20064800 | 2.08160300  | 4.67097600  |
| C | -1.68268700 | -3.71677300 | -2.63332300 |
| C | -1.83281700 | -4.45442700 | -1.41168600 |
| C | -2.12324100 | -4.68138700 | 1.39771300  |
| C | -2.23703500 | -4.15270500 | 2.72682800  |
| C | -2.35375800 | -2.07972000 | 4.65749800  |
| C | -2.34653200 | -0.71286700 | 5.09078200  |

|   |             |             |             |
|---|-------------|-------------|-------------|
| C | -2.71523600 | -1.98801700 | -4.07013500 |
| C | -2.56931600 | 0.81715700  | -4.48222500 |
| C | -2.56054400 | 2.19120100  | -4.06430400 |
| C | -2.67706900 | 4.26822200  | -2.13865700 |
| C | -2.79210400 | 4.77964300  | -0.80185500 |
| C | -3.08222800 | 4.53741600  | 2.00897200  |
| C | -3.23180200 | 3.80482100  | 3.23338500  |
| C | -3.47915200 | 1.46412800  | 4.80934600  |
| C | -2.83914500 | -3.18025600 | -3.27806600 |
| C | -3.13789800 | -4.62651400 | -0.85604100 |
| C | -3.28524500 | -4.74176900 | 0.56788600  |
| C | -3.51006100 | -3.70721800 | 3.19947200  |
| C | -3.56888300 | -2.65707600 | 4.17660900  |
| C | -3.55342100 | 0.04796200  | 5.02295500  |
| C | -3.89593400 | -1.27005800 | -4.44816600 |
| C | -3.82243000 | 0.14328400  | -4.65544600 |
| C | -3.80677100 | 2.85644000  | -3.82287100 |
| C | -3.86558800 | 3.90460100  | -2.85200700 |
| C | -4.09137600 | 4.92195200  | -0.21336000 |
| C | -4.23781400 | 4.80055100  | 1.20397300  |
| C | -4.53364700 | 3.36093900  | 3.63246300  |
| C | -4.65770900 | 2.17942200  | 4.42608700  |
| C | -4.14179400 | -3.62607900 | -2.88206800 |
| C | -4.29234000 | -4.35379600 | -1.65997700 |
| C | -4.58371600 | -4.58213600 | 1.15291000  |
| C | -4.69750000 | -4.06240200 | 2.48047800  |
| C | -4.81348800 | -1.98715600 | 4.41323900  |
| C | -4.80551200 | -0.62259800 | 4.84027800  |
| C | -5.17996300 | -1.89547400 | -4.31671400 |
| C | -5.03536700 | 0.90543200  | -4.72483800 |
| C | -5.02749000 | 2.27591300  | -4.30298800 |
| C | -5.14413300 | 4.35017500  | -2.37832900 |
| C | -5.25846800 | 4.86554800  | -1.04494500 |
| C | -5.54691100 | 4.62819100  | 1.76400100  |
| C | -5.69645100 | 3.90309300  | 2.99212300  |
| C | -5.94175200 | 1.55886800  | 4.56630200  |

|   |             |             |             |
|---|-------------|-------------|-------------|
| C | -5.30409100 | -3.08495500 | -3.52523500 |
| C | -5.60275900 | -4.52140600 | -1.10176200 |
| C | -5.75010300 | -4.63692600 | 0.31990600  |
| C | -5.97520400 | -3.61069500 | 2.95086700  |
| C | -6.03389400 | -2.56238200 | 3.92758600  |
| C | -6.01652400 | 0.14233900  | 4.77407100  |
| C | -6.35773100 | -1.18167900 | -4.69323200 |
| C | -6.28454700 | 0.23620600  | -4.89936600 |
| C | -6.26975500 | 2.93773600  | -4.06351600 |
| C | -6.32888500 | 3.98803800  | -3.08816100 |
| C | -6.55353000 | 5.00553600  | -0.45974600 |
| C | -6.69966300 | 4.88656800  | 0.96251800  |
| C | -6.99398000 | 3.45779500  | 3.38684300  |
| C | -7.11797300 | 2.27101500  | 4.18389100  |
| C | -6.60302100 | -3.52621400 | -3.12989800 |
| C | -6.75422600 | -4.25257300 | -1.90202700 |
| C | -7.04481400 | -4.48028500 | 0.90123000  |
| C | -7.15900100 | -3.96102700 | 2.23371900  |
| C | -7.27396100 | -1.89368100 | 4.16050500  |
| C | -7.26513900 | -0.52447200 | 4.58929100  |
| C | -7.64103600 | -1.80020800 | -4.55175800 |
| C | -7.49709900 | 0.99507400  | -4.95624500 |
| C | -7.48972800 | 2.35512600  | -4.53443100 |
| C | -7.60655700 | 4.42296300  | -2.61054800 |
| C | -7.71979600 | 4.93584700  | -1.28696800 |
| C | -8.00712700 | 4.70426600  | 1.51655200  |
| C | -8.15531800 | 3.98572400  | 2.73721400  |
| C | -8.39994600 | 1.64590400  | 4.30719100  |
| C | -7.76451700 | -2.98010600 | -3.76405000 |
| C | -8.06253500 | -4.40905700 | -1.34256200 |
| C | -8.20890700 | -4.52361000 | 0.06921900  |
| C | -8.43381300 | -3.50109800 | 2.69535600  |
| C | -8.49176900 | -2.46027100 | 3.66556500  |
| C | -8.47401700 | 0.23827400  | 4.51066200  |
| C | -8.82918200 | -1.09246900 | -4.94432000 |
| C | -8.75607000 | 0.32845900  | -5.14948100 |

|   |              |             |             |
|---|--------------|-------------|-------------|
| C | -8.74179200  | 3.02480900  | -4.30962400 |
| C | -8.80128900  | 4.07585000  | -3.33082700 |
| C | -9.02547300  | 5.09378100  | -0.70649000 |
| C | -9.17151400  | 4.97710500  | 0.71880500  |
| C | -9.46550800  | 3.55279100  | 3.14043900  |
| C | -9.58982900  | 2.36342100  | 3.93827700  |
| C | -9.07428100  | -3.43185200 | -3.38042900 |
| C | -9.22580800  | -4.15751800 | -2.14888200 |
| C | -9.51604900  | -4.38374900 | 0.65093600  |
| C | -9.63050500  | -3.86404700 | 1.98625100  |
| C | -9.74516700  | -1.80017900 | 3.91059300  |
| C | -9.73615400  | -0.42845300 | 4.34039500  |
| C | -10.10257400 | -1.73632200 | -4.86856100 |
| C | -9.95715400  | 1.09218200  | -5.27599900 |
| C | -9.95008100  | 2.47922600  | -4.84254900 |
| C | -10.06858900 | 4.57020300  | -2.89341800 |
| C | -10.18393300 | 5.09439000  | -1.54292600 |
| C | -10.47455300 | 4.86423500  | 1.29416900  |
| C | -10.62571400 | 4.13199800  | 2.54028000  |
| C | -10.87315500 | 1.76420000  | 4.12749500  |
| C | -10.22878700 | -2.93951300 | -4.06338900 |
| C | -10.53035200 | -4.38256000 | -1.61110900 |
| C | -10.67972100 | -4.49859300 | -0.17021300 |
| C | -10.90749900 | -3.46448500 | 2.48766400  |
| C | -10.96649400 | -2.40249400 | 3.47794000  |
| C | -10.94852000 | 0.32766000  | 4.33385800  |
| C | -11.23352000 | -0.99758400 | -5.33390700 |
| C | -11.16325300 | 0.36989800  | -5.53094200 |
| C | -11.14907100 | 3.22790600  | -4.63405800 |
| C | -11.20645900 | 4.23890200  | -3.69154600 |
| C | -11.44401100 | 5.32045500  | -0.90848300 |
| C | -11.58446100 | 5.20962900  | 0.46327700  |
| C | -11.89614000 | 3.70166600  | 3.03238600  |
| C | -12.01579600 | 2.55691900  | 3.79974900  |
| C | -11.49379300 | -3.47684000 | -3.67292400 |
| C | -11.63965900 | -4.17429500 | -2.48713100 |

|   |              |             |             |
|---|--------------|-------------|-------------|
| C | -11.94751900 | -4.41255600 | 0.48297300  |
| C | -12.05771700 | -3.91263200 | 1.76819000  |
| C | -12.17937300 | -1.72416000 | 3.80991500  |
| C | -12.17069700 | -0.40417100 | 4.22382400  |
| H | -12.20141700 | -1.48869800 | -5.42400300 |
| H | -12.07814400 | 0.91041100  | -5.76963300 |
| H | -12.06909200 | 2.92702700  | -5.13323800 |
| H | -12.16973300 | 4.70066600  | -3.47931300 |
| H | -12.33721000 | 5.46500000  | -1.51469200 |
| H | -12.58365300 | 5.27104900  | 0.89217800  |
| H | -12.80325300 | 4.20822600  | 2.70577800  |
| H | -13.01318000 | 2.19961200  | 4.05208400  |
| H | -12.38550800 | -3.23712700 | -4.25044500 |
| H | -12.64141700 | -4.46062000 | -2.16983600 |
| H | -12.85883900 | -4.62873400 | -0.07280900 |
| H | -13.05215400 | -3.75158900 | 2.18205800  |
| H | -13.13797000 | -2.20645000 | 3.62387500  |
| H | -13.12280500 | 0.10926500  | 4.35018900  |
| C | 0.13751200   | 0.97048900  | 8.61591700  |
| H | -0.46195500  | 1.16209700  | 7.72460300  |
| C | -4.72329600  | 1.73267300  | 8.01091200  |
| H | -4.06532700  | 0.95604500  | 7.61583500  |
| H | 0.75199100   | 1.79302700  | 8.98621700  |
| H | -5.74779900  | 1.44184700  | 8.24946000  |

**UP-8-(8,8)**

|   |             |             |             |
|---|-------------|-------------|-------------|
| C | 0.57416500  | 0.27976600  | -7.88558000 |
| C | -1.12978600 | 1.99265700  | -7.75435300 |
| C | -0.41164500 | -0.71145700 | -7.93981000 |
| H | 1.62624100  | -0.01111600 | -7.87751600 |
| C | -2.11675600 | 0.99979200  | -7.80799600 |
| H | -1.41129000 | 3.03736500  | -7.64237200 |
| H | -0.13013000 | -1.76211400 | -7.97247700 |
| H | -3.16780700 | 1.28604100  | -7.73731200 |
| C | -4.60120200 | -6.97372400 | -3.33601200 |
| C | -6.64881800 | -6.94733300 | -4.78934600 |

|   |             |              |             |
|---|-------------|--------------|-------------|
| C | -5.39393200 | -6.46963200  | -4.48184100 |
| C | -4.66946800 | -5.48458800  | -5.31585500 |
| C | -5.28544400 | -4.36672200  | -5.90444100 |
| C | -2.53271300 | -4.65905300  | -6.17372600 |
| C | -4.56855300 | -3.41673100  | -6.64354100 |
| H | -6.34490500 | -4.18559300  | -5.73297600 |
| H | -1.44574300 | -4.68638600  | -6.20615500 |
| H | -5.09556600 | -2.56621600  | -7.06838900 |
| C | -1.77158400 | -0.35973200  | -7.87159800 |
| C | -3.17478500 | -3.55041400  | -6.75500200 |
| C | -2.87819700 | -1.39366900  | -7.80444100 |
| H | -3.36286500 | -1.54620000  | -8.78724100 |
| H | -3.64587900 | -1.03215000  | -7.10214800 |
| O | -2.33717900 | -2.64272700  | -7.34960300 |
| C | -3.25469100 | -5.63889200  | -5.47761800 |
| C | -2.60704700 | -6.80697100  | -4.83812900 |
| C | -1.60906900 | -7.53475700  | -5.44849600 |
| S | -0.93694200 | -7.16588600  | -7.07631600 |
| S | -0.91825100 | -9.05218000  | -4.77244500 |
| C | -0.06688900 | -8.68336700  | -7.27121700 |
| H | 0.44050200  | -8.84863800  | -8.21957200 |
| C | -0.05767900 | -9.53636100  | -6.22914100 |
| H | 0.45839800  | -10.49413400 | -6.20847200 |
| S | -7.56692200 | -6.48065100  | -6.26462500 |
| C | -8.76550000 | -8.51982500  | -5.03636500 |
| H | -9.47401200 | -9.31690900  | -4.81987900 |
| S | -7.50799700 | -8.21384100  | -3.84378400 |
| C | -8.79341400 | -7.73595900  | -6.13116000 |
| H | -9.52722600 | -7.80378800  | -6.93178400 |
| C | -4.37734200 | -7.66795400  | -0.99708700 |
| C | -3.19652200 | -7.16717200  | -3.52940600 |
| C | -2.43264000 | -7.61902100  | -2.43858600 |
| H | -1.35136900 | -7.69558600  | -2.53518600 |
| C | -3.00208000 | -7.89537200  | -1.19137900 |
| H | -2.36310000 | -8.21814500  | -0.37403500 |
| C | -5.16102000 | -7.20461900  | -2.06957800 |

|   |             |             |             |
|---|-------------|-------------|-------------|
| H | -6.20082300 | -6.95814600 | -1.86644200 |
| O | -5.02682600 | -7.80550300 | 0.20018500  |
| C | 1.99045800  | 8.28851000  | -0.12072700 |
| C | 1.14674700  | 8.02001400  | -2.81493900 |
| C | 2.90679200  | 7.91230000  | -1.12315100 |
| H | 3.90946400  | 7.63376800  | -0.80613800 |
| C | 0.65286800  | 8.55082000  | -0.46872700 |
| H | -0.08578200 | 8.82254500  | 0.28060700  |
| C | 0.24843200  | 8.38183100  | -1.79700300 |
| H | -0.81160200 | 8.47668800  | -2.02618000 |
| C | 2.51916700  | 7.80032400  | -2.46866300 |
| C | 3.45588700  | 7.41057200  | -3.55329700 |
| C | 0.72804000  | 7.79217500  | -4.21262400 |
| C | 1.45698100  | 6.68820200  | -4.87301500 |
| C | 2.85088000  | 6.53566400  | -4.58613200 |
| C | 0.81791000  | 5.77000600  | -5.71770400 |
| H | -0.26223700 | 5.79351200  | -5.84704500 |
| C | 3.54678800  | 5.50899600  | -5.25235600 |
| H | 4.59089300  | 5.32163800  | -5.01272600 |
| C | 2.92172700  | 4.63703400  | -6.15359600 |
| H | 3.50289300  | 3.84847000  | -6.62544100 |
| C | 1.53550000  | 4.74425700  | -6.35630400 |
| O | 0.77488800  | 3.89305600  | -7.11397600 |
| C | 0.22842000  | 1.63780600  | -7.76193700 |
| C | 1.33895200  | 2.65229300  | -7.55832200 |
| C | -0.17747700 | 8.58681400  | -4.87949500 |
| C | 4.74433000  | 7.89820800  | -3.62994600 |
| S | -0.62409000 | 8.37536800  | -6.61002700 |
| S | -0.94756200 | 10.04797800 | -4.16607500 |
| S | 5.47258300  | 9.02689900  | -2.43336500 |
| S | 5.85529300  | 7.59302400  | -5.01154100 |
| C | -1.58791200 | 10.68155800 | -5.67873500 |
| H | -2.09106100 | 11.64574400 | -5.64256400 |
| C | -1.44095000 | 9.92517700  | -6.78327300 |
| H | -1.80748400 | 10.18737500 | -7.77378100 |
| C | 7.06404100  | 8.78787200  | -4.55846800 |

|   |             |             |             |
|---|-------------|-------------|-------------|
| H | 7.90487500  | 8.92798300  | -5.23477200 |
| C | 6.88943700  | 9.43717700  | -3.39161800 |
| H | 7.56857900  | 10.18246100 | -2.98239600 |
| H | 1.91207200  | 2.82164200  | -8.48923500 |
| H | 2.03743000  | 2.25887800  | -6.80264300 |
| O | 2.48077900  | 8.31080000  | 1.15828900  |
| C | 1.52429800  | 8.46932900  | 2.22615200  |
| H | 0.65023300  | 7.83174500  | 2.02410700  |
| H | 1.17981100  | 9.51838900  | 2.26300800  |
| C | 2.15209600  | 8.02728000  | 3.54657400  |
| H | 2.93958900  | 8.72891700  | 3.86173700  |
| H | 2.63088200  | 7.05217000  | 3.38086600  |
| C | 1.05714600  | 7.88381400  | 4.62621500  |
| H | 0.73835800  | 8.87719100  | 4.98425800  |
| H | 0.16961900  | 7.42532200  | 4.15978500  |
| C | 1.45863100  | 6.99314000  | 5.81502900  |
| H | 2.23153000  | 7.48643800  | 6.42850200  |
| H | 1.91359200  | 6.07059500  | 5.42159500  |
| C | 0.24679600  | 6.60505600  | 6.68156500  |
| H | -0.16314000 | 7.49611900  | 7.18772700  |
| H | -0.54883100 | 6.23597900  | 6.01318700  |
| C | 0.55979500  | 5.50567200  | 7.70996000  |
| H | 1.25091700  | 5.88682600  | 8.48147100  |
| H | 1.09067400  | 4.68926800  | 7.19514100  |
| C | -0.70292800 | 4.92741100  | 8.37202100  |
| H | -1.16768800 | 5.68248600  | 9.02918600  |
| H | -1.44331100 | 4.69379200  | 7.59194600  |
| C | -0.41150200 | 3.64050400  | 9.17704100  |
| H | 0.29402700  | 3.88846000  | 9.99157200  |
| H | 0.09608200  | 2.91359500  | 8.52310300  |
| C | -4.20976700 | -8.02154400 | 1.36726900  |
| H | -3.76600500 | -9.03282500 | 1.32951300  |
| H | -3.38611400 | -7.29071200 | 1.37339600  |
| C | -5.06095200 | -7.83753200 | 2.61925900  |
| H | -5.58855300 | -6.87650400 | 2.54438200  |
| H | -5.82521800 | -8.62791300 | 2.68336400  |



|   |             |             |             |
|---|-------------|-------------|-------------|
| C | -4.16188000 | -7.84214800 | 3.86858100  |
| H | -3.33715600 | -7.13212900 | 3.70449600  |
| H | -3.69857500 | -8.83693900 | 3.99068700  |
| C | -4.90215400 | -7.46654200 | 5.16331200  |
| H | -5.33412800 | -6.45738900 | 5.05087000  |
| H | -5.74837700 | -8.15889600 | 5.30862100  |
| C | -3.98759000 | -7.50177200 | 6.40663800  |
| H | -3.49446700 | -8.48868800 | 6.46131100  |
| H | -4.60076300 | -7.40819000 | 7.31859400  |
| C | -2.91683900 | -6.39738300 | 6.41062800  |
| H | -2.35574200 | -6.41506900 | 5.46369500  |
| H | -3.41322500 | -5.41364400 | 6.44862400  |
| C | -1.91013000 | -6.51003300 | 7.56683200  |
| H | -1.38025400 | -7.47508200 | 7.50003100  |
| H | -2.44232100 | -6.50843500 | 8.53410300  |
| C | -0.88032200 | -5.35795700 | 7.53391300  |
| H | -1.42793200 | -4.40668900 | 7.65709600  |
| H | -0.41325600 | -5.32225700 | 6.53941600  |
| C | 0.19622900  | -5.46543800 | 8.58119700  |
| C | -1.66104300 | 3.01951300  | 9.74698800  |
| H | -2.25745300 | 3.66021100  | 10.40682600 |
| H | -0.14230600 | -5.52127000 | 9.62233900  |
| H | 12.48630600 | 0.26185300  | -4.87794200 |
| H | 12.89544900 | 2.09921600  | -3.35159500 |
| H | 13.14958600 | 3.06464300  | -1.50987100 |
| H | 13.28286000 | 3.28825000  | 0.89958700  |
| H | 13.24160700 | 2.68054100  | 2.90359200  |
| H | 13.02162900 | 1.16280200  | 4.78005900  |
| H | 12.71058200 | -0.65578400 | 5.77236100  |
| H | 12.26420300 | -3.02470000 | 6.02292000  |
| H | 12.08717600 | -1.70647200 | -5.47177800 |
| H | 11.64093000 | -4.07582100 | -5.22508000 |
| H | 11.32682400 | -5.89397800 | -4.23332800 |
| H | 11.10285900 | -7.40965900 | -2.35542900 |
| H | 11.05811300 | -8.01786400 | -0.35173400 |
| H | 11.19110200 | -7.79344500 | 2.05796100  |

|   |             |             |             |
|---|-------------|-------------|-------------|
| H | 11.44796300 | -6.82811200 | 3.89915300  |
| H | 11.86101200 | -4.99355600 | 5.42819800  |
| C | 11.63117600 | 0.78977800  | -4.45866700 |
| C | 11.86473300 | 1.83886800  | -3.58740000 |
| C | 12.22848800 | 3.22081100  | -0.95044800 |
| C | 12.30459600 | 3.34829300  | 0.42512700  |
| C | 12.24575400 | 2.47868600  | 3.29507500  |
| C | 12.12019800 | 1.61213100  | 4.36627400  |
| C | 11.67461900 | -0.99073100 | 5.78972300  |
| C | 11.41983000 | -2.34305200 | 5.93293200  |
| C | 11.05906100 | -2.02818300 | -5.31296800 |
| C | 10.80432100 | -3.38080500 | -5.17221900 |
| C | 10.35497100 | -5.98362900 | -3.75040500 |
| C | 10.22711700 | -6.84886200 | -2.67839100 |
| C | 10.16483900 | -7.71524800 | 0.19254600  |
| C | 10.24079300 | -7.58713700 | 1.56799500  |
| C | 10.60744400 | -6.20753600 | 4.20592600  |
| C | 10.84326600 | -5.16034700 | 5.07875900  |
| C | 10.30955400 | 0.30945900  | -4.70421200 |
| C | 10.79374700 | 2.48391700  | -2.89840500 |
| C | 10.97004000 | 3.15367800  | -1.62087600 |
| C | 11.12761500 | 3.41739100  | 1.22992900  |
| C | 11.09905200 | 2.99573600  | 2.62021600  |
| C | 10.83860200 | 1.19960400  | 4.84060700  |
| C | 10.62294400 | -0.06069600 | 5.53094700  |
| C | 10.09473700 | -2.86362900 | 5.82814400  |
| C | 10.03241600 | -1.05550700 | -5.11886600 |
| C | 9.50432800  | -3.85918500 | -4.82742300 |
| C | 9.28668000  | -5.11991000 | -4.13838100 |
| C | 9.02189100  | -6.91263300 | -1.91604100 |
| C | 8.99201200  | -7.33103500 | -0.52488700 |
| C | 9.14943600  | -7.06531100 | 2.32593800  |
| C | 9.32686700  | -6.39800900 | 3.60438000  |
| C | 9.81543200  | -4.22810900 | 5.41397000  |
| C | 9.22519700  | 1.13195100  | -4.26773400 |
| C | 9.46777700  | 2.22206900  | -3.36295900 |

|   |            |             |             |
|---|------------|-------------|-------------|
| C | 9.81150400 | 3.52795100  | -0.87231400 |
| C | 9.89042500 | 3.65970200  | 0.55663200  |
| C | 9.83467100 | 2.83723100  | 3.26740000  |
| C | 9.70425600 | 1.93723600  | 4.38012200  |
| C | 9.28381700 | -0.51939200 | 5.72794400  |
| C | 9.01919600 | -1.92384600 | 5.87742300  |
| C | 8.68459600 | -1.52924100 | -5.07811000 |
| C | 8.41986500 | -2.93424400 | -4.93253900 |
| C | 7.99573100 | -5.39194700 | -3.58875300 |
| C | 7.86317600 | -6.28958300 | -2.47449000 |
| C | 7.80563600 | -7.10304000 | 0.23875700  |
| C | 7.88459500 | -6.96972400 | 1.66738900  |
| C | 8.23009500 | -5.67030600 | 4.16114800  |
| C | 8.47487000 | -4.58359600 | 5.06885900  |
| C | 7.86992800 | 0.74033200  | -4.54303100 |
| C | 8.34870900 | 2.89102500  | -2.75761800 |
| C | 8.52157600 | 3.54815000  | -1.50581700 |
| C | 8.67706000 | 3.80738800  | 1.31292800  |
| C | 8.64889300 | 3.39315100  | 2.67510900  |
| C | 8.39156900 | 1.61813600  | 4.87083500  |
| C | 8.18054300 | 0.38416200  | 5.54911900  |
| C | 7.65864200 | -2.38591700 | 5.84479100  |
| C | 7.59816400 | -0.59686000 | -4.95118100 |
| C | 7.07600300 | -3.36858700 | -4.66521000 |
| C | 6.86273300 | -4.60364300 | -3.98957200 |
| C | 6.60180600 | -6.37217800 | -1.79042300 |
| C | 6.57328900 | -6.77959800 | -0.42647100 |
| C | 6.72911500 | -6.51600800 | 2.39182900  |
| C | 6.90248100 | -5.86422500 | 3.64575300  |
| C | 7.38493500 | -3.72256800 | 5.43803700  |
| C | 6.78613800 | 1.59803600  | -4.17185700 |
| C | 7.02819200 | 2.68587100  | -3.26913500 |
| C | 7.37254600 | 3.99481700  | -0.77887700 |
| C | 7.45089000 | 4.12568800  | 0.64704200  |
| C | 7.39434900 | 3.29994700  | 3.35760800  |
| C | 7.26424500 | 2.40255600  | 4.46800100  |

|   |            |             |             |
|---|------------|-------------|-------------|
| C | 6.84464700 | -0.05230100 | 5.81945100  |
| C | 6.58069800 | -1.45304300 | 5.96968300  |
| C | 6.24537400 | -1.06299600 | -4.98626700 |
| C | 5.98080500 | -2.46468300 | -4.84243400 |
| C | 5.55679700 | -4.92157200 | -3.49782600 |
| C | 5.42504400 | -5.81472100 | -2.38458600 |
| C | 5.36870800 | -6.62306300 | 0.33019300  |
| C | 5.44764800 | -6.48938000 | 1.75517100  |
| C | 5.79236300 | -5.19382300 | 4.25128900  |
| C | 6.03619000 | -4.11183900 | 5.15925200  |
| C | 5.44293900 | 1.21296700  | -4.46505400 |
| C | 5.92219900 | 3.36605400  | -2.67532000 |
| C | 6.09674800 | 4.03102700  | -1.41805800 |
| C | 6.25191400 | 4.29095200  | 1.40482500  |
| C | 6.22285400 | 3.87175800  | 2.77499000  |
| C | 5.96564300 | 2.09514600  | 4.97601900  |
| C | 5.75360100 | 0.85462800  | 5.66074500  |
| C | 5.23112000 | -1.91899800 | 5.95878200  |
| C | 5.16898500 | -0.13140000 | -4.87909300 |
| C | 4.64548600 | -2.90727200 | -4.59649500 |
| C | 4.43061600 | -4.14982700 | -3.91635000 |
| C | 4.17026600 | -5.91667100 | -1.71094500 |
| C | 4.14256500 | -6.32360600 | -0.33746000 |
| C | 4.29900500 | -6.05802100 | 2.48526300  |
| C | 4.47290400 | -5.40434700 | 3.74827900  |
| C | 4.95558600 | -3.26348200 | 5.54816800  |
| C | 4.35762500 | 2.06605300  | -4.08022100 |
| C | 4.59845200 | 3.14597200  | -3.17696700 |
| C | 4.94427700 | 4.46661700  | -0.68580400 |
| C | 5.02238200 | 4.59918400  | 0.73523000  |
| C | 4.96491700 | 3.76770800  | 3.45539800  |
| C | 4.83535400 | 2.87478400  | 4.56412800  |
| C | 4.41533100 | 0.41391300  | 5.92688600  |
| C | 4.15209200 | -0.98262400 | 6.07745700  |
| C | 3.81416200 | -0.60062500 | -4.90448300 |
| C | 3.54964800 | -1.99829000 | -4.76519100 |

|   |            |             |             |
|---|------------|-------------|-------------|
| C | 3.12372800 | -4.46425800 | -3.41680600 |
| C | 2.99301600 | -5.35296300 | -2.30477500 |
| C | 2.93832800 | -6.15887900 | 0.42259300  |
| C | 3.01748700 | -6.02437900 | 1.84362300  |
| C | 3.36257500 | -4.72643200 | 4.35153100  |
| C | 3.60518500 | -3.64928700 | 5.25959600  |
| C | 3.01138700 | 1.67727400  | -4.36737500 |
| C | 3.48955600 | 3.82122300  | -2.57776100 |
| C | 3.66412600 | 4.48861300  | -1.32514800 |
| C | 3.81803000 | 4.75225400  | 1.49419400  |
| C | 3.78915400 | 4.33388300  | 2.86522000  |
| C | 3.53316000 | 2.56270800  | 5.07389400  |
| C | 3.32121200 | 1.32400100  | 5.76505300  |
| C | 2.79837600 | -1.45137300 | 6.06522000  |
| C | 2.73585300 | 0.33456300  | -4.78642600 |
| C | 2.21051600 | -2.44211900 | -4.51524200 |
| C | 1.99506600 | -3.68754800 | -3.83657800 |
| C | 1.73567700 | -5.45358000 | -1.62561400 |
| C | 1.70913700 | -5.85838600 | -0.24920100 |
| C | 1.86667600 | -5.59011000 | 2.57753100  |
| C | 2.04028300 | -4.93507800 | 3.84206800  |
| C | 2.52261000 | -2.79574500 | 5.64922000  |
| C | 1.93142300 | 2.52934100  | -3.98604300 |
| C | 2.17333000 | 3.60889400  | -3.08317200 |
| C | 2.51365100 | 4.91376300  | -0.59679700 |
| C | 2.59107000 | 5.04104900  | 0.82440400  |
| C | 2.53410300 | 4.21954500  | 3.53733100  |
| C | 2.40531300 | 3.33174300  | 4.65376600  |
| C | 1.98708100 | 0.88362500  | 6.02880100  |
| C | 1.72319400 | -0.51711600 | 6.18267200  |
| C | 1.38604400 | -0.13037700 | -4.80299800 |
| C | 1.12040900 | -1.53114200 | -4.67384200 |
| C | 0.69368800 | -3.99674400 | -3.33299600 |
| C | 0.56341100 | -4.88648700 | -2.21545200 |
| C | 0.51073400 | -5.68984300 | 0.51060100  |
| C | 0.59058500 | -5.55443700 | 1.93620200  |

|   |             |             |             |
|---|-------------|-------------|-------------|
| C | 0.93533000  | -4.25319100 | 4.43927900  |
| C | 1.17774800  | -3.17646500 | 5.35395200  |
| C | 0.58498700  | 2.14707000  | -4.28039800 |
| C | 1.06622700  | 4.29643200  | -2.49767400 |
| C | 1.23592800  | 4.94334600  | -1.23963400 |
| C | 1.38554000  | 5.18629500  | 1.57806700  |
| C | 1.35595100  | 4.77300500  | 2.94207600  |
| C | 1.10112000  | 3.01727700  | 5.15467100  |
| C | 0.89070800  | 1.78893900  | 5.85217100  |
| C | 0.36862000  | -0.98392400 | 6.16001000  |
| C | 0.31055500  | 0.80654800  | -4.68161900 |
| C | -0.21767700 | -1.96954300 | -4.41645000 |
| C | -0.43199600 | -3.20889000 | -3.73889500 |
| C | -0.68936100 | -4.97068700 | -1.52780200 |
| C | -0.71587000 | -5.37547600 | -0.15840300 |
| C | -0.55852400 | -5.11011200 | 2.66675600  |
| C | -0.38561300 | -4.45217400 | 3.92298500  |
| C | 0.09481100  | -2.32173300 | 5.73919100  |
| C | -0.49458300 | 3.01321600  | -3.91850300 |
| C | -0.25194400 | 4.09875200  | -3.01792000 |
| C | 0.08488500  | 5.37639700  | -0.51333300 |
| C | 0.16000200  | 5.49573000  | 0.90848500  |
| C | 0.10186800  | 4.67843800  | 3.62205100  |
| C | -0.02782300 | 3.79154500  | 4.73593200  |
| C | -0.44776600 | 1.35146600  | 6.11671600  |
| C | -0.71104100 | -0.04793900 | 6.27624300  |
| C | -1.04105800 | 0.34432000  | -4.70633500 |
| C | -1.30714500 | -1.05374200 | -4.57170900 |
| C | -1.73320000 | -3.50917900 | -3.22432900 |
| C | -1.86316800 | -4.39723800 | -2.11341500 |
| C | -1.91557000 | -5.20130400 | 0.60204600  |
| C | -1.83729700 | -5.07033600 | 2.02451200  |
| C | -1.49416400 | -3.77121000 | 4.52085900  |
| C | -1.25331000 | -2.70171400 | 5.44027400  |
| C | -1.83806500 | 2.63060300  | -4.21150200 |
| C | -1.35714600 | 4.78346800  | -2.42748600 |

|   |             |             |             |
|---|-------------|-------------|-------------|
| C | -1.18707600 | 5.42536600  | -1.15804900 |
| C | -1.03781100 | 5.66750000  | 1.66586900  |
| C | -1.06740800 | 5.25236800  | 3.03683600  |
| C | -1.32637200 | 3.48832600  | 5.24358000  |
| C | -1.53930000 | 2.25543100  | 5.93977600  |
| C | -2.06223200 | -0.51306300 | 6.25291800  |
| C | -2.11248800 | 1.28131500  | -4.60276300 |
| C | -2.64033500 | -1.48862300 | -4.31160800 |
| C | -2.85554600 | -2.72739800 | -3.63118600 |
| C | -3.11302900 | -4.48906000 | -1.43340100 |
| C | -3.14052100 | -4.89565100 | -0.06386300 |
| C | -2.98524000 | -4.63394700 | 2.75393800  |
| C | -2.81166600 | -3.97803600 | 4.01365700  |
| C | -2.33592700 | -1.85627700 | 5.83349100  |
| C | -2.92147200 | 3.49119400  | -3.83809000 |
| C | -2.67940000 | 4.57435400  | -2.93775800 |
| C | -2.33732900 | 5.86271800  | -0.42650500 |
| C | -2.26228200 | 5.98537100  | 0.99609600  |
| C | -2.32193100 | 5.15924800  | 3.71879700  |
| C | -2.45223400 | 4.27051900  | 4.82973200  |
| C | -2.87670000 | 1.81865100  | 6.20091600  |
| C | -3.14064000 | 0.42394200  | 6.35638200  |
| C | -3.46573600 | 0.81730000  | -4.62836500 |
| C | -3.73055800 | -0.57729500 | -4.47634700 |
| C | -4.15531200 | -3.03398100 | -3.12444800 |
| C | -4.28546400 | -3.92365300 | -2.01998200 |
| C | -4.34099600 | -4.73147600 | 0.69504100  |
| C | -4.26258600 | -4.59736800 | 2.11212700  |
| C | -3.92246600 | -3.30962300 | 4.61928200  |
| C | -3.68322600 | -2.23971100 | 5.53451700  |
| C | -4.27123000 | 3.10254800  | -4.12621100 |
| C | -3.79074600 | 5.25112300  | -2.33503800 |
| C | -3.61816200 | 5.90162700  | -1.06944500 |
| C | -3.46635900 | 6.14685200  | 1.75705500  |
| C | -3.49630700 | 5.73151000  | 3.12850900  |
| C | -3.75639600 | 3.96590400  | 5.33933600  |

|   |             |             |             |
|---|-------------|-------------|-------------|
| C | -3.97025800 | 2.72876200  | 6.02904000  |
| C | -4.49586600 | -0.04309200 | 6.33188600  |
| C | -4.54569500 | 1.75471000  | -4.52803400 |
| C | -5.06983900 | -1.01702100 | -4.21941100 |
| C | -5.28289100 | -2.25351700 | -3.53491100 |
| C | -5.54313600 | -4.03006600 | -1.34417400 |
| C | -5.57148500 | -4.43871100 | 0.02575200  |
| C | -5.41677100 | -4.17085600 | 2.84550000  |
| C | -5.24542700 | -3.52160100 | 4.10984200  |
| C | -4.77003800 | -1.38691500 | 5.91799800  |
| C | -5.35349400 | 3.95113100  | -3.74175100 |
| C | -5.11061900 | 5.03577100  | -2.83599600 |
| C | -4.76812900 | 6.32629000  | -0.33654200 |
| C | -4.69150200 | 6.45086700  | 1.09005400  |
| C | -4.74975300 | 5.63072700  | 3.80410200  |
| C | -4.88092400 | 4.73980200  | 4.92000100  |
| C | -5.30531900 | 2.29123900  | 6.28220600  |
| C | -5.57110200 | 0.89064800  | 6.43375800  |
| C | -5.89557800 | 1.28805100  | -4.54422600 |
| C | -6.16036300 | -0.11284800 | -4.39035800 |
| C | -6.58230300 | -2.56879900 | -3.04065700 |
| C | -6.71459100 | -3.46931700 | -1.93284900 |
| C | -6.77096500 | -4.28056200 | 0.78119900  |
| C | -6.69282500 | -4.14358200 | 2.20638500  |
| C | -6.35396900 | -2.84849300 | 4.70606100  |
| C | -6.11309000 | -1.76795500 | 5.61717100  |
| C | -6.70186800 | 3.55831400  | -4.01927500 |
| C | -6.22205700 | 5.70231500  | -2.22838800 |
| C | -6.04981600 | 6.35177700  | -0.97280600 |
| C | -5.89646600 | 6.60199300  | 1.84760100  |
| C | -5.92568700 | 6.19069800  | 3.21085400  |
| C | -6.18608000 | 4.42681100  | 5.41633900  |
| C | -6.39935800 | 3.19582300  | 6.09994700  |
| C | -6.92451400 | 0.42639900  | 6.39659400  |
| C | -6.97463100 | 2.22030600  | -4.42418000 |
| C | -7.49663200 | -0.55206800 | -4.12659600 |



|   |              |             |             |
|---|--------------|-------------|-------------|
| C | -7.70863600  | -1.78745200 | -3.44901800 |
| C | -7.96905600  | -3.56387400 | -1.25225600 |
| C | -7.99758100  | -3.97191800 | 0.11269500  |
| C | -7.84377000  | -3.70280800 | 2.93337400  |
| C | -7.67306200  | -3.05060800 | 4.18828300  |
| C | -7.19712600  | -0.90983800 | 5.98641600  |
| C | -7.79311600  | 4.41789300  | -3.65044300 |
| C | -7.54972200  | 5.50505400  | -2.74262300 |
| C | -7.20648900  | 6.79942500  | -0.24621200 |
| C | -7.12865600  | 6.92750000  | 1.18310700  |
| C | -7.18635400  | 6.10971400  | 3.89625600  |
| C | -7.31844500  | 5.21530400  | 5.01344400  |
| C | -7.74367400  | 2.76452000  | 6.36990900  |
| C | -8.01003200  | 1.36030200  | 6.51930500  |
| C | -8.33500800  | 1.75615600  | -4.45716400 |
| C | -8.59970700  | 0.35107100  | -4.30756800 |
| C | -9.02195900  | -2.10824400 | -2.96068600 |
| C | -9.15369000  | -3.00789100 | -1.84690100 |
| C | -9.21067100  | -3.82111600 | 0.86842300  |
| C | -9.13287900  | -3.68506800 | 2.29757200  |
| C | -8.79339700  | -2.38415400 | 4.79364900  |
| C | -8.55196900  | -1.29843400 | 5.70404400  |
| C | -9.13335500  | 4.06017600  | -3.99499500 |
| C | -8.64778000  | 6.22981900  | -2.18442900 |
| C | -8.47148500  | 6.89456400  | -0.90446300 |
| C | -8.31526300  | 7.15287800  | 1.94728400  |
| C | -8.34475900  | 6.73387400  | 3.33835800  |
| C | -8.60885500  | 4.94760900  | 5.56635300  |
| C | -8.82720400  | 3.68999100  | 6.26076200  |
| C | -9.35844100  | 0.88810200  | 6.55728200  |
| C | -9.41140200  | 2.69519300  | -4.40903100 |
| C | -9.93891400  | -0.10864900 | -4.11196000 |
| C | -10.15533200 | -1.36971300 | -3.42191100 |
| C | -10.41796600 | -3.16319300 | -1.19894900 |
| C | -10.44723800 | -3.58040900 | 0.19328600  |
| C | -10.29243700 | -3.31099300 | 3.04483100  |

|   |              |             |             |
|---|--------------|-------------|-------------|
| C | -10.11819100 | -2.64310000 | 4.32387900  |
| C | -9.63643200  | -0.47562600 | 6.13928600  |
| C | -10.16244700 | 4.99082700  | -3.65930500 |
| C | -9.92814400  | 6.03781800  | -2.78577400 |
| C | -9.56382200  | 7.41230700  | -0.14517600 |
| C | -9.48841900  | 7.53736400  | 1.23059000  |
| C | -9.54902300  | 6.67337000  | 4.10240900  |
| C | -9.67653200  | 5.81148300  | 5.17711300  |
| C | -10.12783600 | 3.21401000  | 6.60671100  |
| C | -10.38427900 | 1.86198600  | 6.74954300  |
| C | -10.73608600 | 2.17372900  | -4.51454200 |
| C | -10.99048900 | 0.82120100  | -4.37141700 |
| C | -11.43728800 | -1.78119900 | -2.94758800 |
| C | -11.56390100 | -2.64619500 | -1.87507400 |
| C | -11.62445400 | -3.50826500 | 0.99728600  |
| C | -11.54997900 | -3.37852800 | 2.37287200  |
| C | -11.19028800 | -1.99873700 | 5.01183800  |
| C | -10.95795900 | -0.95297400 | 5.88742500  |
| H | -11.18014100 | 4.82247300  | -4.00816400 |
| H | -10.76973600 | 6.65646100  | -2.47797900 |
| H | -10.51450100 | 7.61797800  | -0.63472600 |
| H | -10.38232400 | 7.83734100  | 1.77525700  |
| H | -10.42423900 | 7.23514200  | 3.77975400  |
| H | -10.64760700 | 5.72511700  | 5.66215300  |
| H | -10.96363300 | 3.91009900  | 6.65784900  |
| H | -11.41282200 | 1.54151200  | 6.90805200  |
| H | -11.58084700 | 2.85486400  | -4.60495200 |
| H | -12.02644600 | 0.48611700  | -4.35458800 |
| H | -12.33843100 | -1.33162000 | -3.36180000 |
| H | -12.56012800 | -2.84628000 | -1.48358300 |
| H | -12.60235200 | -3.44887000 | 0.52195700  |
| H | -12.47181500 | -3.22183400 | 2.93086500  |
| H | -12.22064100 | -2.25681600 | 4.77216900  |
| H | -11.81364300 | -0.42498700 | 6.30546700  |
| C | -2.09152600  | 1.77918200  | 9.47327800  |
| H | -1.52545900  | 1.11855800  | 8.81338500  |

|   |             |             |            |
|---|-------------|-------------|------------|
| H | -3.01784400 | 1.38470800  | 9.89473000 |
| C | 1.51040000  | -5.50039300 | 8.31419600 |
| H | 1.87771900  | -5.44431300 | 7.28659200 |
| H | 2.25769200  | -5.57784300 | 9.10608700 |

**UP-8-(9,9)**

|   |             |             |             |
|---|-------------|-------------|-------------|
| C | 3.42135700  | 0.36006700  | -8.13364200 |
| C | 1.31520800  | 1.54418000  | -8.26533500 |
| C | 2.74670400  | -0.86549800 | -8.21078300 |
| H | 4.50747700  | 0.36676000  | -8.02142800 |
| C | 0.64292000  | 0.32053700  | -8.34984100 |
| H | 0.75664500  | 2.47721500  | -8.25508300 |
| H | 3.30131400  | -1.79981800 | -8.15234200 |
| H | -0.44737200 | 0.31116500  | -8.39968600 |
| C | 0.15723500  | -8.17126300 | -4.00557900 |
| C | -1.76680900 | -8.62315300 | -5.55068800 |
| C | -0.69477300 | -7.84321200 | -5.17325400 |
| C | -0.21891100 | -6.67679900 | -5.94928000 |
| C | -1.07747100 | -5.75026000 | -6.56704700 |
| C | 1.66199200  | -5.27720700 | -6.64573000 |
| C | -0.60057000 | -4.62166600 | -7.24688500 |
| H | -2.15485600 | -5.86287300 | -6.46334800 |
| H | 2.71661700  | -5.01227100 | -6.60716700 |
| H | -1.30974900 | -3.93029700 | -7.69508900 |
| C | 1.34502300  | -0.89587000 | -8.29521900 |
| C | 0.78061500  | -4.36617500 | -7.25591700 |
| C | 0.54756800  | -2.18461400 | -8.26445400 |
| H | 0.16172700  | -2.45512200 | -9.26554600 |
| H | -0.31904800 | -2.04102200 | -7.59895300 |
| O | 1.37635400  | -3.24675800 | -7.77474200 |
| C | 1.19237200  | -6.44402000 | -6.02699200 |
| C | 2.09744300  | -7.43285400 | -5.39818000 |
| C | 3.27027100  | -7.84753900 | -5.99159600 |
| S | 3.88118600  | -7.23043000 | -7.56780900 |
| S | 4.30355400  | -9.17472500 | -5.35288600 |
| C | 5.11033400  | -8.46971000 | -7.79342200 |

|   |             |              |             |
|---|-------------|--------------|-------------|
| H | 5.67158300  | -8.45113200  | -8.72553000 |
| C | 5.30219000  | -9.34888600  | -6.79145600 |
| H | 6.04175100  | -10.14711600 | -6.79160700 |
| S | -2.71786700 | -8.36556000  | -7.05597000 |
| C | -3.37907500 | -10.69009600 | -5.93355300 |
| H | -3.85923200 | -11.65257200 | -5.76836800 |
| S | -2.29617800 | -10.10403700 | -4.67652300 |
| C | -3.57113200 | -9.90408800  | -7.01009000 |
| H | -4.22926100 | -10.13465800 | -7.84541300 |
| C | 0.46468900  | -8.92276500  | -1.69331600 |
| C | 1.57249900  | -8.00223100  | -4.13845300 |
| C | 2.38599300  | -8.32323600  | -3.03705700 |
| H | 3.45582400  | -8.12951400  | -3.08472500 |
| C | 1.85993600  | -8.80830100  | -1.83473800 |
| H | 2.53056700  | -9.02464200  | -1.00756900 |
| C | -0.37159700 | -8.59351100  | -2.77642400 |
| H | -1.44656800 | -8.61798700  | -2.61031600 |
| O | -0.17595000 | -9.28797300  | -0.54085500 |
| C | 0.12823700  | 8.88885900   | -1.41643300 |
| C | 0.38671500  | 8.15230700   | -4.14118300 |
| C | 1.39998000  | 8.65394700   | -1.97671900 |
| H | 2.25370400  | 8.67916300   | -1.30391400 |
| C | -1.01924800 | 8.73775300   | -2.21472100 |
| H | -2.01759000 | 8.87433200   | -1.80921700 |
| C | -0.87237700 | 8.33808200   | -3.54679100 |
| H | -1.77215900 | 8.12289100   | -4.12104900 |
| C | 1.55691700  | 8.32425300   | -3.33305800 |
| C | 2.88178200  | 8.12227900   | -3.97300500 |
| C | 0.55465600  | 7.74606900   | -5.54972800 |
| C | 1.70140800  | 6.84270900   | -5.77505800 |
| C | 2.89783000  | 7.07210800   | -5.01939500 |
| C | 1.64637700  | 5.77409800   | -6.68003900 |
| H | 0.71132600  | 5.51048000   | -7.17052900 |
| C | 4.00910300  | 6.25652600   | -5.30149300 |
| H | 4.91527800  | 6.35406000   | -4.70847500 |
| C | 3.97897200  | 5.24442500   | -6.27102700 |

|   |             |             |              |
|---|-------------|-------------|--------------|
| H | 4.86992200  | 4.64395400  | -6.44076200  |
| C | 2.77477900  | 4.97567400  | -6.93914600  |
| O | 2.57643200  | 3.97257500  | -7.85239200  |
| C | 2.71396600  | 1.57398700  | -8.13281500  |
| C | 3.48344500  | 2.86440100  | -7.90857500  |
| C | -0.19969100 | 8.25822900  | -6.58317000  |
| C | 3.97081600  | 8.92191400  | -3.68444600  |
| S | 0.06311600  | 7.86588900  | -8.31993200  |
| S | -1.46749800 | 9.51767700  | -6.37060100  |
| S | 3.94865200  | 10.27747500 | -2.50066100  |
| S | 5.54703900  | 8.82999800  | -4.54654200  |
| C | -1.62793800 | 9.91429600  | -8.07841200  |
| H | -2.29809400 | 10.73075700 | -8.34005500  |
| C | -0.93534200 | 9.16750600  | -8.95940300  |
| H | -0.96141800 | 9.29040300  | -10.04034800 |
| C | 6.21060900  | 10.32841500 | -3.90866700  |
| H | 7.18536400  | 10.63949800 | -4.27891900  |
| C | 5.48530900  | 10.98360900 | -2.98243800  |
| H | 5.78519600  | 11.90631300 | -2.48961200  |
| H | 4.21635400  | 3.03640300  | -8.71748800  |
| H | 4.04145100  | 2.77283400  | -6.96460500  |
| O | 0.11373800  | 9.19859200  | -0.08250600  |
| C | -1.17333500 | 9.38150800  | 0.54048200   |
| H | -1.83402000 | 8.54415700  | 0.26894100   |
| H | -1.63460500 | 10.31428600 | 0.16888800   |
| C | -0.99980200 | 9.39027700  | 2.05656100   |
| H | -0.43782000 | 10.28008400 | 2.37895400   |
| H | -0.40021700 | 8.51040200  | 2.32757300   |
| C | -2.37457200 | 9.30758600  | 2.75329900   |
| H | -2.86909200 | 10.29343400 | 2.74796700   |
| H | -3.02380500 | 8.63368000  | 2.16973500   |
| C | -2.31168800 | 8.75193300  | 4.18658500   |
| H | -1.78190100 | 9.45412000  | 4.85263700   |
| H | -1.71857500 | 7.82428000  | 4.17431000   |
| C | -3.71162900 | 8.43838300  | 4.74158200   |
| H | -4.27811300 | 9.37504500  | 4.88484500   |

|   |             |              |            |
|---|-------------|--------------|------------|
| H | -4.26398700 | 7.85834400   | 3.98442400 |
| C | -3.69972100 | 7.63456300   | 6.05164100 |
| H | -3.20923500 | 8.21792000   | 6.85039900 |
| H | -3.09151400 | 6.72674200   | 5.91073800 |
| C | -5.11464500 | 7.23109100   | 6.49644800 |
| H | -5.71171000 | 8.13950100   | 6.68952000 |
| H | -5.61713300 | 6.69884700   | 5.67477400 |
| C | -5.12757100 | 6.33456200   | 7.75393200 |
| H | -4.59012600 | 6.86351200   | 8.56301900 |
| H | -4.57025200 | 5.40647300   | 7.55097300 |
| C | 0.62609300  | -9.42380400  | 0.64842500 |
| H | 1.26612400  | -10.32102800 | 0.56698700 |
| H | 1.28302800  | -8.54596700  | 0.74691000 |
| C | -0.29871900 | -9.49520900  | 1.85885900 |
| H | -0.97728300 | -8.63240800  | 1.81099600 |
| H | -0.92300200 | -10.40043200 | 1.81190500 |
| C | 0.51270700  | -9.44759200  | 3.17301100 |
| H | 1.41329600  | -8.82699800  | 3.02404000 |
| H | 0.87214600  | -10.45610100 | 3.43791700 |
| C | -0.27682100 | -8.83474700  | 4.34048200 |
| H | -0.56745200 | -7.81721100  | 4.04999900 |
| H | -1.21793100 | -9.38714200  | 4.49615400 |
| C | 0.53466000  | -8.78791900  | 5.65270000 |
| H | 1.59879900  | -8.62446100  | 5.41034700 |
| H | 0.47715500  | -9.77171700  | 6.14887500 |
| C | 0.09493800  | -7.68076800  | 6.63400600 |
| H | 0.61770100  | -7.82518000  | 7.59511100 |
| H | 0.42784100  | -6.70700200  | 6.24593200 |
| C | -1.41901900 | -7.60425100  | 6.89040600 |
| H | -1.80528100 | -8.59739700  | 7.18035300 |
| H | -1.93864600 | -7.32256400  | 5.96157100 |
| C | -1.75983800 | -6.58127600  | 7.99696600 |
| H | -1.32821300 | -5.60092100  | 7.74088900 |
| H | -1.26390200 | -6.91319500  | 8.92853000 |
| C | -3.24161100 | -6.43962100  | 8.23433200 |
| C | -6.52914700 | 6.00795800   | 8.20363800 |

|   |             |             |             |
|---|-------------|-------------|-------------|
| H | -7.17125700 | 6.87185400  | 8.41207900  |
| H | -3.79184000 | -7.37528900 | 8.38827300  |
| C | 10.88447900 | 6.16174500  | 2.77318500  |
| C | 9.61452700  | 5.94465900  | 3.38586400  |
| C | 8.46164600  | 6.01631900  | 2.54386500  |
| C | 8.61211700  | 6.02991400  | 1.11481000  |
| C | 9.91509200  | 5.96861700  | 0.53010600  |
| C | 11.02928000 | 6.17273800  | 1.39728500  |
| C | 7.14796000  | 5.87389400  | 3.10950700  |
| C | 5.99003700  | 6.02201400  | 2.28172100  |
| C | 6.14039500  | 6.03988200  | 0.85678600  |
| C | 7.44547200  | 5.90378200  | 0.28529000  |
| C | 4.68602300  | 5.90103500  | 2.85118900  |
| C | 3.52670000  | 6.04050300  | 2.01954000  |
| C | 3.67626400  | 6.05985300  | 0.59896300  |
| C | 4.98433000  | 5.93711400  | 0.02556900  |
| C | 2.22028500  | 5.91093500  | 2.59163100  |
| C | 1.06676800  | 6.03498400  | 1.75864500  |
| C | 1.21628600  | 6.05355200  | 0.33566100  |
| C | 2.51848300  | 5.94752300  | -0.23715000 |
| C | 4.54310100  | 5.39715100  | 4.18401400  |
| C | 3.24270000  | 5.04339500  | 4.67311100  |
| C | 2.07693000  | 5.41303300  | 3.92853300  |
| C | 5.70651100  | 5.02359700  | 4.92256100  |
| C | 5.58701500  | 4.09634600  | 6.00827200  |
| C | 4.30601300  | 3.56078800  | 6.34115400  |
| C | 3.12314600  | 4.12239200  | 5.75890900  |
| C | 7.00564200  | 5.37267200  | 4.43474600  |
| C | 8.17742800  | 5.01865700  | 5.18791800  |
| C | 8.05769900  | 4.08670200  | 6.27511800  |
| C | 6.76861000  | 3.53248700  | 6.58542400  |
| C | 9.46902800  | 5.43467000  | 4.73868800  |
| C | 10.58381800 | 5.11031700  | 5.56766000  |
| C | 10.46858100 | 4.21236400  | 6.61391800  |
| C | 9.22948200  | 3.57096300  | 6.91097800  |
| C | 6.68650800  | 2.29697100  | 7.28822800  |

|   |             |            |             |
|---|-------------|------------|-------------|
| C | 7.89415200  | 1.62025800 | 7.67391400  |
| C | 9.14615800  | 2.30812000 | 7.62502200  |
| C | 5.42325000  | 1.63634300 | 7.41085000  |
| C | 4.22307600  | 2.32001000 | 7.05034900  |
| C | 2.95816700  | 1.65651600 | 7.17203500  |
| C | 1.75524900  | 2.34358900 | 6.80932400  |
| C | 1.83906400  | 3.58438100 | 6.09617300  |
| C | 0.66053700  | 4.14091900 | 5.51118200  |
| C | 0.78171200  | 5.05709700 | 4.41620900  |
| C | 0.49420000  | 1.68102400 | 6.92967700  |
| C | -0.70865100 | 2.36572900 | 6.55897500  |
| C | -0.62409500 | 3.60005000 | 5.84344100  |
| C | -1.80493400 | 4.15490300 | 5.25191600  |
| C | -1.68241400 | 5.05931900 | 4.14925100  |
| C | -0.38294000 | 5.41129100 | 3.66304400  |
| C | -0.23857600 | 5.89417200 | 2.32777300  |
| C | 0.06187600  | 5.93247300 | -0.50025400 |
| C | -1.24225700 | 6.04506500 | 0.07270000  |
| C | -1.39368800 | 6.02575000 | 1.49426300  |
| C | -2.69622100 | 5.91114900 | 2.06325700  |
| C | -2.84187500 | 5.41860400 | 3.39829200  |
| C | -3.85102100 | 6.06109400 | 1.23219800  |
| C | -3.70042000 | 6.08540200 | -0.18785500 |
| C | -2.39621500 | 5.95621500 | -0.76250100 |
| C | -2.25657600 | 5.50361300 | -2.11350800 |
| C | -0.96407000 | 5.15072100 | -2.60680700 |
| C | 0.20152100  | 5.48066100 | -1.84513900 |
| C | 1.49714300  | 5.12917500 | -2.33593500 |
| C | 2.65836200  | 5.46997300 | -1.57960300 |
| C | -4.86118200 | 5.98879500 | -1.02264000 |
| C | -4.72272900 | 5.52564200 | -2.37043000 |
| C | -3.42565800 | 5.17092300 | -2.86895500 |
| C | -3.31653500 | 4.27307200 | -3.97527500 |
| C | -2.03831500 | 3.72332500 | -4.31590200 |
| C | -0.85303100 | 4.25617200 | -3.71949500 |
| C | 0.42386700  | 3.69483300 | -4.04424800 |



|   |             |             |             |
|---|-------------|-------------|-------------|
| C | 1.60826100  | 4.22118900  | -3.43548100 |
| C | 0.48794400  | 2.45870200  | -4.75668600 |
| C | -0.72364500 | 1.79734400  | -5.13880100 |
| C | -1.97316700 | 2.48298100  | -5.03273300 |
| C | -3.18534200 | 1.81470900  | -5.40306500 |
| C | -4.44093300 | 2.49602600  | -5.28303300 |
| C | -4.50694200 | 3.73235800  | -4.56344900 |
| C | -5.78193300 | 4.27721400  | -4.22118200 |
| C | -5.89093000 | 5.18269000  | -3.11597300 |
| C | -3.17125000 | 0.40634800  | -5.64673400 |
| C | -1.94538500 | -0.32123000 | -5.51171500 |
| C | -0.71174400 | 0.38444600  | -5.36965200 |
| C | 0.51093600  | -0.34501200 | -5.22408500 |
| C | 1.74848500  | 0.35630800  | -5.09526500 |
| C | 1.73635400  | 1.76573800  | -4.85789100 |
| C | 2.94246100  | 2.41863100  | -4.46654000 |
| C | 2.87661100  | 3.64783600  | -3.74188100 |
| C | 0.47181600  | -1.74895300 | -4.98278200 |
| C | -0.79031900 | -2.41277100 | -4.87781100 |
| C | -1.98505000 | -1.73278900 | -5.26238100 |
| C | -3.24644800 | -2.40134800 | -5.15993500 |
| C | -4.44807500 | -1.71505200 | -5.53293900 |
| C | -4.41025800 | -0.30379100 | -5.77691500 |
| C | -5.63480100 | 0.41980200  | -5.90040400 |
| C | -5.65027600 | 1.83068700  | -5.64938300 |
| C | -3.33175300 | -3.64306500 | -4.45676800 |
| C | -2.15524400 | -4.20372800 | -3.86673600 |
| C | -0.87640400 | -3.65462500 | -4.17752000 |
| C | 0.30138900  | -4.22250900 | -3.60265700 |
| C | 1.58519700  | -3.68723500 | -3.93447400 |
| C | 1.67065800  | -2.44135400 | -4.62840400 |
| C | 2.93101900  | -1.78534200 | -4.74876300 |
| C | 2.96759100  | -0.37358700 | -4.97280900 |
| C | 0.18050700  | -5.14870300 | -2.52685800 |
| C | -1.11769800 | -5.50646200 | -2.04446300 |
| C | -2.27741100 | -5.14171000 | -2.79172400 |

|   |             |             |             |
|---|-------------|-------------|-------------|
| C | -3.57724300 | -5.49410800 | -2.30660900 |
| C | -4.74163500 | -5.11587700 | -3.05166200 |
| C | -4.61809800 | -4.18682300 | -4.13501400 |
| C | -5.79429000 | -3.62139100 | -4.71423800 |
| C | -5.70860800 | -2.37636300 | -5.41947300 |
| C | -3.72258400 | -5.98794800 | -0.97349400 |
| C | -2.56600100 | -6.12303900 | -0.14025500 |
| C | -1.26303600 | -5.99763300 | -0.70959800 |
| C | -0.10698000 | -6.11862800 | 0.12338500  |
| C | 1.19824900  | -6.00330600 | -0.44851100 |
| C | 1.34318400  | -5.51507400 | -1.78266400 |
| C | 2.63873400  | -5.17584400 | -2.27334700 |
| C | 2.76206600  | -4.25821100 | -3.36376000 |
| C | -0.25561800 | -6.11632700 | 1.54125000  |
| C | -1.56101200 | -5.99282500 | 2.11461000  |
| C | -2.71667000 | -6.12000200 | 1.28505900  |
| C | -4.02134400 | -5.98800500 | 1.85964800  |
| C | -5.18154700 | -6.09916500 | 1.02516800  |
| C | -5.03122000 | -6.09707900 | -0.39911100 |
| C | -6.18547700 | -5.95116200 | -1.22672800 |
| C | -6.03943500 | -5.45652000 | -2.56386600 |
| C | -4.15848600 | -5.50722000 | 3.19812200  |
| C | -2.99027100 | -5.16141100 | 3.95059700  |
| C | -1.69824500 | -5.51168700 | 3.45493700  |
| C | -0.52865800 | -5.16634100 | 4.20416200  |
| C | 0.76513500  | -5.53446800 | 3.71553500  |
| C | 0.90159500  | -6.01321600 | 2.37488000  |
| C | 2.20308900  | -6.15180700 | 1.80357900  |
| C | 2.35244600  | -6.14338800 | 0.37988700  |
| C | -5.45434300 | -5.14428000 | 3.68998700  |
| C | -6.62077500 | -5.48091800 | 2.93854500  |
| C | -6.48323800 | -5.96083000 | 1.59526200  |
| C | 1.93126100  | -5.21122300 | 4.47250600  |
| C | -0.63737200 | -4.27501000 | 5.31205500  |
| C | -1.91514700 | -3.72676500 | 5.65283600  |
| C | -3.09869200 | -4.25631900 | 5.05469400  |

|   |             |             |            |
|---|-------------|-------------|------------|
| C | -4.37478900 | -3.70361400 | 5.38965800 |
| C | -5.56272000 | -4.23755300 | 4.79255600 |
| C | -4.44180900 | -2.48118700 | 6.12364300 |
| C | -3.23196700 | -1.82347500 | 6.51782600 |
| C | -1.98111800 | -2.50313100 | 6.39393200 |
| C | -0.76800100 | -1.84323900 | 6.77808300 |
| C | 0.48543500  | -2.52670000 | 6.65472300 |
| C | 0.55069600  | -3.75419800 | 5.91868400 |
| C | 1.82359600  | -4.30985000 | 5.58146600 |
| C | -3.24709000 | -0.41530000 | 6.78537000 |
| C | -2.01108800 | 0.29039800  | 6.92065400 |
| C | -0.78270900 | -0.43825800 | 7.04073000 |
| C | 0.45690200  | 0.26897800  | 7.17270400 |
| C | 1.68183500  | -0.45819400 | 7.29201400 |
| C | 1.69621600  | -1.86804200 | 7.03265000 |
| C | 2.94941700  | -2.54989400 | 6.90131600 |
| C | 3.01335600  | -3.77854700 | 6.17516500 |
| C | 4.29065200  | -4.33310800 | 5.83318300 |
| C | -6.83646500 | -3.68562000 | 5.12518300 |
| C | -6.90392400 | -2.45612600 | 5.85764200 |
| C | -5.69674100 | -1.80072300 | 6.24710900 |
| C | -5.71262000 | -0.39445600 | 6.51287900 |
| C | -4.47361200 | 0.31243800  | 6.65509400 |
| C | -4.43589100 | 1.71924600  | 6.41228100 |
| C | -3.17272200 | 2.38494400  | 6.30490300 |
| C | -1.97358800 | 1.70242500  | 6.67844500 |
| C | 2.92132400  | 0.24922000  | 7.41439800 |
| C | 4.15041100  | -0.47903400 | 7.53121000 |
| C | 4.16458600  | -1.88720800 | 7.27385300 |
| C | 5.41475800  | -2.56458500 | 7.14313100 |
| C | 5.47831900  | -3.79845900 | 6.41788100 |
| C | -8.02315400 | -4.21239200 | 4.52355700 |
| C | -9.30883700 | -3.67289100 | 4.87250800 |
| C | -9.37614700 | -2.43816700 | 5.60453300 |
| C | -8.15625700 | -1.77347700 | 5.97213100 |
| C | -8.17205600 | -0.37408300 | 6.23426600 |

|   |             |             |             |
|---|-------------|-------------|-------------|
| C | -6.93552700 | 0.33032300  | 6.38055600  |
| C | -6.89732200 | 1.74106900  | 6.13683200  |
| C | -5.63666400 | 2.40097900  | 6.02813600  |
| C | -3.08715400 | 3.61956600  | 5.58257000  |
| C | -4.26412700 | 4.16814500  | 4.97962800  |
| C | -5.55034100 | 3.63388800  | 5.30854400  |
| C | -9.40690900 | 0.35308400  | 6.12594800  |
| C | -9.36820200 | 1.76938600  | 5.88571500  |
| C | -8.09553300 | 2.42352000  | 5.75649000  |
| C | -8.00864700 | 3.65359700  | 5.04558500  |
| C | -6.72409900 | 4.18794400  | 4.71767100  |
| C | -6.60042800 | 5.10302600  | 3.62332700  |
| C | -5.30365400 | 5.44470500  | 3.13676700  |
| C | -4.14033100 | 5.07162400  | 3.88350100  |
| C | 5.38664700  | 0.22486200  | 7.65263800  |
| C | -7.91488300 | -5.11318300 | 3.42587900  |
| C | 4.39690700  | -5.24050300 | 4.73045000  |
| C | 3.22464200  | -5.57886300 | 3.97921900  |
| C | 3.36128600  | -6.05207100 | 2.63813200  |
| C | -9.09279100 | -5.47101800 | 2.68413800  |
| C | -8.95471100 | -5.95033200 | 1.33644700  |
| C | -7.64209400 | -6.06225300 | 0.76213200  |
| C | -7.49255800 | -6.05586200 | -0.65405300 |
| C | 5.68769700  | -5.59806400 | 4.23478600  |
| C | 5.82378100  | -6.07541800 | 2.89040400  |
| C | 4.66672000  | -6.18578500 | 2.06175600  |
| C | 4.81581300  | -6.17935600 | 0.63718500  |
| C | 3.65797500  | -6.03897900 | -0.19528600 |
| C | 3.80209700  | -5.55098300 | -1.52989400 |
| C | -8.65644900 | -5.93507400 | -1.48839200 |
| C | -8.50990100 | -5.43911100 | -2.82912500 |
| C | -7.20309800 | -5.07555300 | -3.30394600 |
| C | -7.07999500 | -4.15561300 | -4.38418900 |
| C | 6.11942200  | -6.06268200 | 0.06673700  |
| C | 6.26460600  | -5.57215300 | -1.27228400 |
| C | 5.10400800  | -5.20750700 | -2.02022600 |

|   |             |             |             |
|---|-------------|-------------|-------------|
| C | 5.22776700  | -4.28637800 | -3.11023600 |
| C | 4.04734700  | -3.72251300 | -3.69602000 |
| C | 4.13245500  | -2.47881600 | -4.39361300 |
| C | -8.26449900 | -3.60664000 | -4.98501900 |
| C | -8.17838300 | -2.35992700 | -5.69447000 |
| C | -6.90990700 | -1.69008400 | -5.78446200 |
| C | -6.87286900 | -0.28692900 | -6.02540300 |
| C | 6.50955300  | -3.74333500 | -3.42802800 |
| C | 6.59542200  | -2.49644200 | -4.12984900 |
| C | 5.39768700  | -1.81411900 | -4.50193600 |
| C | 5.43461700  | -0.40032600 | -4.72773700 |
| C | 4.20652500  | 0.32871400  | -4.84282300 |
| C | 4.19233600  | 1.73021000  | -4.57892100 |
| C | -8.10474300 | 0.43827800  | -6.17367400 |
| C | -8.12090100 | 1.85214000  | -5.91777500 |
| C | -6.90444200 | 2.50774100  | -5.52296100 |
| C | -6.97060500 | 3.73543000  | -4.80475700 |
| C | 6.66898900  | 0.30346800  | -4.58614700 |
| C | 6.65402700  | 1.71182300  | -4.32011200 |
| C | 5.40501700  | 2.39150400  | -4.20033300 |
| C | 5.33717500  | 3.62073200  | -3.47187000 |
| C | 4.06004100  | 4.17121300  | -3.13519800 |
| C | 3.95246600  | 5.09802900  | -2.05941000 |
| C | -8.25323100 | 4.29852900  | -4.48317700 |
| C | -8.36241600 | 5.20766900  | -3.37581900 |
| C | -7.18606400 | 5.53160400  | -2.61650600 |
| C | -7.32289700 | 5.99786800  | -1.27783200 |
| C | -6.16299400 | 6.10826600  | -0.44776900 |
| C | -6.31317900 | 6.08818000  | 0.97719500  |
| C | -5.15884100 | 5.94525500  | 1.80423900  |
| C | 6.52193000  | 4.16076300  | -2.88977300 |
| C | 6.41363200  | 5.08439500  | -1.79924100 |
| C | 5.12294700  | 5.45220700  | -1.31378300 |
| C | -8.63423600 | 6.14156100  | -0.70683200 |
| C | -8.78420200 | 6.12693800  | 0.72255700  |
| C | -7.61928400 | 5.96492100  | 1.54825900  |

|   |              |             |             |
|---|--------------|-------------|-------------|
| C | -7.76338500  | 5.47256100  | 2.87693200  |
| C | -9.07105700  | 5.14701300  | 3.37538700  |
| C | -9.19481100  | 4.22639200  | 4.47225100  |
| C | -10.64787400 | -0.35251600 | 6.05646500  |
| C | -10.63208800 | -1.78107300 | 5.79003700  |
| C | -10.57045600 | 2.47836400  | 5.57782500  |
| C | -10.48164700 | 3.73668700  | 4.85599800  |
| C | -10.38763600 | -5.17048700 | 3.20982900  |
| C | -10.49815200 | -4.25008400 | 4.32891400  |
| C | -9.66637100  | -5.12715900 | -3.60907300 |
| C | -9.54058200  | -4.19055500 | -4.71300700 |
| C | -9.95913300  | -6.11882400 | -0.92941400 |
| C | -10.11159400 | -6.12757400 | 0.51574000  |
| C | -10.08741400 | 6.07840900  | 1.30820700  |
| C | -10.23399000 | 5.57863500  | 2.66520800  |
| C | -9.78822700  | 6.10452800  | -1.54946700 |
| C | -9.64921500  | 5.62583100  | -2.91459200 |
| C | -9.36323900  | 2.55692500  | -5.86290400 |
| C | -9.43121200  | 3.80820900  | -5.12730100 |
| C | -9.33073600  | -0.26799000 | -6.37685600 |
| C | -9.36831700  | -1.69983000 | -6.13219000 |
| C | 6.61441800   | -0.50098000 | 7.76553300  |
| C | 6.62849500   | -1.90153300 | 7.51003500  |
| C | 7.58281900   | 5.42404100  | -1.04848400 |
| C | 7.89473100   | -0.42274300 | -4.45505600 |
| C | 7.85748700   | -1.82800300 | -4.22546400 |
| C | 7.86359700   | 2.37119100  | -3.93362900 |
| C | 7.79742000   | 3.60103800  | -3.21775800 |
| C | 6.75431500   | -4.34789600 | 6.07448500  |
| C | 6.85941600   | -5.25196700 | 4.97940100  |
| C | 7.27628000   | -6.19431700 | 0.89861400  |
| C | 7.12799500   | -6.20088000 | 2.31515800  |
| C | 7.56460000   | -5.21753800 | -1.75356800 |
| C | 7.68746800   | -4.29848300 | -2.83464800 |
| C | -11.62073300 | 4.39457800  | 4.30395200  |
| C | -11.50144400 | 5.28179300  | 3.24882000  |

|   |              |             |             |
|---|--------------|-------------|-------------|
| C | -11.80359300 | 1.79304100  | 5.79049500  |
| C | -11.84089500 | 0.42913900  | 6.02076200  |
| C | -11.19886400 | 6.31214200  | 0.44511600  |
| C | -11.05480600 | 6.32425000  | -0.93099500 |
| C | -11.74413600 | -3.71162400 | 4.76808100  |
| C | -11.80878000 | -2.52199800 | 5.47164200  |
| C | -11.38299300 | -6.07487700 | 1.16041100  |
| C | -11.51601700 | -5.61406200 | 2.45821300  |
| C | -11.06802200 | -6.05450900 | -1.82451300 |
| C | -10.92693100 | -5.57680600 | -3.11537600 |
| C | -10.76808300 | 5.33242500  | -3.74947900 |
| C | -10.66301500 | 4.45669200  | -4.81553400 |
| C | -10.52227600 | 1.87372700  | -6.33718500 |
| C | -10.50647700 | 0.51265400  | -6.58522200 |
| C | -10.58398300 | -2.44456300 | -6.08097500 |
| C | -10.66699900 | -3.64435500 | -5.39697000 |
| C | 8.98116700   | -3.76929100 | -3.16953500 |
| C | 9.06724900   | -2.51887300 | -3.87264300 |
| C | 8.73618500   | -5.60457800 | -1.01647700 |
| C | 8.59049500   | -6.10008200 | 0.32464400  |
| C | 9.14075800   | 0.28346600  | -4.33227100 |
| C | 9.12530200   | 1.69678100  | -4.06974500 |
| C | 8.15867400   | -5.63318100 | 4.49735400  |
| C | 8.29452600   | -6.11400900 | 3.14994300  |
| C | 7.88600400   | -2.58919300 | 7.40522700  |
| C | 7.94952000   | -3.82771900 | 6.67962400  |
| C | 7.85775700   | 0.20414500  | 7.91461000  |
| C | 8.99401000   | 4.15147600  | -2.64309900 |
| C | 8.88512800   | 5.07298200  | -1.54511100 |
| C | 9.07363800   | -0.52281400 | 8.10468500  |
| C | 9.08799800   | -1.95232300 | 7.84434500  |
| C | 10.05485900  | 5.47824300  | -0.83071900 |
| C | 10.37073800  | -0.44267900 | -4.27698300 |
| C | 10.33301300  | -1.87631000 | -4.04174500 |
| C | 10.33937400  | 2.38257400  | -3.75498200 |
| C | 10.27216600  | 3.63826500  | -3.02597100 |

|   |              |             |             |
|---|--------------|-------------|-------------|
| C | 9.21491900   | -4.42862900 | 6.39544500  |
| C | 9.32169900   | -5.35352700 | 5.27988800  |
| C | 9.74435700   | -6.30880400 | 1.14221200  |
| C | 9.59296500   | -6.31604700 | 2.58739500  |
| C | 10.03583400  | -5.31570900 | -1.53667800 |
| C | 10.16123800  | -4.37538700 | -2.63735900 |
| C | 11.41557000  | -3.84590700 | -3.06341700 |
| C | 11.49834900  | -2.64180500 | -3.73982700 |
| C | 11.15671100  | -5.79057700 | -0.79285100 |
| C | 11.01635900  | -6.26943400 | 0.49755400  |
| C | 11.57605000  | 0.31895100  | -4.22669100 |
| C | 11.56100900  | 1.67956200  | -3.97568800 |
| C | 10.57289100  | -5.82146800 | 4.77926400  |
| C | 10.70349800  | -6.28527000 | 3.48234300  |
| C | 10.29164500  | -2.71528000 | 7.77885200  |
| C | 10.35269700  | -3.90841700 | 7.08105500  |
| C | 10.26194200  | 0.23766500  | 8.31622400  |
| C | 10.29679300  | 1.60144500  | 8.08538500  |
| C | 11.42250800  | 4.27308000  | -2.47002500 |
| C | 11.31780400  | 5.15926200  | -1.41261900 |
| H | -11.82106400 | -5.46025700 | -3.72557500 |
| H | -12.06780500 | -6.29618000 | -1.46755600 |
| H | -11.64003500 | -4.12487000 | -5.30914500 |
| H | -12.28541600 | -6.31291900 | 0.59975500  |
| H | -11.46886700 | 2.40519600  | -6.42050200 |
| H | -11.44125600 | 0.02372400  | -6.85453400 |
| H | -11.56743500 | 4.19393100  | -5.36177100 |
| H | -11.49479500 | -2.02571400 | -6.50568800 |
| H | -12.20140900 | 6.39281900  | 0.86192600  |
| H | -11.94948100 | 6.41384500  | -1.54492500 |
| H | -12.41043600 | 5.68454400  | 2.80507600  |
| H | -11.75120800 | 5.72627600  | -3.49708000 |
| H | -12.51807500 | -5.50670700 | 2.87017800  |
| H | -12.67626600 | -4.18850200 | 4.46966400  |
| H | -12.81165600 | -0.06013700 | 6.08104700  |
| H | -12.74644200 | 2.32579900  | 5.67815200  |



|   |              |             |             |
|---|--------------|-------------|-------------|
| H | -12.78911200 | -2.10705900 | 5.70009800  |
| H | -12.61904900 | 4.13210400  | 4.65019200  |
| H | 11.25160700  | 2.11748200  | 8.17139000  |
| H | 11.19056900  | -0.26839600 | 8.57497600  |
| H | 11.36940200  | 3.92918000  | 7.15585700  |
| H | 11.21080400  | -2.31547500 | 8.20391000  |
| H | 12.03308400  | 6.24673300  | 0.98213400  |
| H | 11.77968100  | 6.22796200  | 3.38928500  |
| H | 12.23331100  | 5.54213200  | -0.96461600 |
| H | 11.57111700  | 5.50006800  | 5.32537200  |
| H | 12.53888300  | -0.18478900 | -4.29438900 |
| H | 12.51256500  | 2.19485500  | -3.85568500 |
| H | 12.48501100  | -2.23648800 | -3.95803300 |
| H | 12.41648700  | 3.99256700  | -2.81456500 |
| H | 11.31766400  | -4.40297900 | 6.98306300  |
| H | 11.46935200  | -5.73106100 | 5.39045400  |
| H | 11.91472500  | -6.53147000 | 1.05399700  |
| H | 12.16033800  | -5.69342000 | -1.20360300 |
| H | 11.69793900  | -6.54261100 | 3.12145700  |
| H | 12.34025300  | -4.34278900 | -2.77452500 |
| C | -3.90831300  | -5.27653900 | 8.25559300  |
| H | -3.39173500  | -4.32747000 | 8.10138300  |
| H | -4.98565400  | -5.23218600 | 8.42439700  |
| C | -7.03546800  | 4.77315700  | 8.33202700  |
| H | -6.43025700  | 3.88923400  | 8.12372200  |
| H | -8.06751400  | 4.60554800  | 8.64505500  |

**UP-9-(5,5)**

|   |            |             |             |
|---|------------|-------------|-------------|
| C | 7.45752600 | 0.36868600  | -4.97694200 |
| C | 5.54425800 | 1.78814900  | -5.39862800 |
| C | 6.65148000 | -0.77028100 | -5.09800300 |
| H | 8.51732700 | 0.25235500  | -4.74066300 |
| C | 4.73652000 | 0.65058000  | -5.51402500 |
| H | 5.11446400 | 2.78249800  | -5.50356900 |
| H | 7.07616400 | -1.76098300 | -4.95072800 |
| H | 3.66556400 | 0.76718000  | -5.69129900 |

|   |             |              |             |
|---|-------------|--------------|-------------|
| C | 2.73233700  | -6.73461600  | -0.42125500 |
| C | 1.03928800  | -7.50075000  | -2.11354200 |
| C | 2.11395300  | -6.71298300  | -1.76864200 |
| C | 2.81819900  | -5.82392100  | -2.71915100 |
| C | 2.15634700  | -5.01194700  | -3.65819800 |
| C | 4.91938200  | -4.76679500  | -3.38827400 |
| C | 2.84368700  | -4.09791200  | -4.46530200 |
| H | 1.06979400  | -5.03142500  | -3.71534000 |
| H | 5.97883500  | -4.57506600  | -3.23507900 |
| H | 2.29001100  | -3.46579600  | -5.15585600 |
| C | 5.27823600  | -0.63813200  | -5.36104800 |
| C | 4.23097800  | -3.94886300  | -4.29930400 |
| C | 4.34375200  | -1.82999900  | -5.44854200 |
| H | 4.03594300  | -2.01894300  | -6.49386900 |
| H | 3.43390400  | -1.61083600  | -4.86718500 |
| O | 4.99465600  | -2.99952000  | -4.92802400 |
| C | 4.24076600  | -5.71432100  | -2.60847000 |
| C | 4.92690200  | -6.54474600  | -1.59136500 |
| C | 6.13142600  | -7.16840400  | -1.82764000 |
| S | 7.04118000  | -7.05541800  | -3.37570000 |
| S | 6.91548200  | -8.30389400  | -0.67435300 |
| C | 8.17694800  | -8.35231800  | -3.02227000 |
| H | 8.88352400  | -8.62312300  | -3.80430300 |
| C | 8.12087600  | -8.91677800  | -1.80062300 |
| H | 8.77516100  | -9.71142000  | -1.44767400 |
| S | 0.35533200  | -7.59261900  | -3.77455800 |
| C | -0.71675800 | -9.48153900  | -2.22892600 |
| H | -1.32007500 | -10.32934800 | -1.91056400 |
| S | 0.23975400  | -8.66520500  | -0.99749300 |
| C | -0.66446300 | -8.99732800  | -3.48450500 |
| H | -1.21910800 | -9.39475800  | -4.33212400 |
| C | 2.57388800  | -6.71420600  | 2.02234000  |
| C | 4.15608400  | -6.68989300  | -0.33735900 |
| C | 4.74635900  | -6.70094700  | 0.94442800  |
| H | 5.82497200  | -6.59350300  | 1.04125400  |
| C | 3.97942900  | -6.73359700  | 2.10749900  |

|   |             |             |             |
|---|-------------|-------------|-------------|
| H | 4.44777100  | -6.68236500 | 3.08919100  |
| C | 1.96074100  | -6.73483000 | 0.75704900  |
| H | 0.87966400  | -6.67561900 | 0.67348200  |
| O | 1.91052800  | -6.60890300 | 3.21369500  |
| C | 1.46136700  | 6.31970300  | 0.92025100  |
| C | 2.90645000  | 6.58199600  | -1.50633000 |
| C | 2.87067800  | 6.30445900  | 0.92110900  |
| H | 3.36918400  | 6.10322400  | 1.86693800  |
| C | 0.77204500  | 6.45186300  | -0.29838400 |
| H | -0.31300200 | 6.43625800  | -0.34455000 |
| C | 1.50205900  | 6.53822000  | -1.48877700 |
| H | 0.95461100  | 6.54059200  | -2.43042100 |
| C | 3.60876800  | 6.47335500  | -0.26283200 |
| C | 5.09152100  | 6.53081000  | -0.29851200 |
| C | 3.69245100  | 6.71860100  | -2.74953300 |
| C | 4.96275100  | 5.96294300  | -2.73480900 |
| C | 5.69425500  | 5.91342300  | -1.50462000 |
| C | 5.46308400  | 5.29794200  | -3.86666400 |
| H | 4.87846800  | 5.24823200  | -4.78354600 |
| C | 6.94083000  | 5.25972100  | -1.51257600 |
| H | 7.50683600  | 5.16201600  | -0.58990100 |
| C | 7.46827700  | 4.66054000  | -2.66233800 |
| H | 8.43875700  | 4.17296000  | -2.60655600 |
| C | 6.71215800  | 4.65615700  | -3.84261000 |
| O | 7.14374200  | 4.11393600  | -5.03679800 |
| C | 6.91542400  | 1.65659900  | -5.12313600 |
| C | 7.84111800  | 2.85974000  | -5.01717400 |
| C | 3.35231400  | 7.57936500  | -3.77018500 |
| C | 5.82821600  | 7.20787200  | 0.65312000  |
| S | 4.36232700  | 7.86223400  | -5.23313300 |
| S | 1.92173200  | 8.67091700  | -3.72823100 |
| S | 5.11327700  | 8.07066200  | 2.06123300  |
| S | 7.60694200  | 7.46113900  | 0.56073500  |
| C | 2.40695400  | 9.67078000  | -5.09373000 |
| H | 1.77742400  | 10.52498100 | -5.33500200 |
| C | 3.51027100  | 9.30489900  | -5.77369100 |

|   |             |             |             |
|---|-------------|-------------|-------------|
| H | 3.90630700  | 9.81953700  | -6.64691700 |
| C | 7.70191400  | 8.66427200  | 1.83992500  |
| H | 8.67500200  | 9.11139000  | 2.03292000  |
| C | 6.57193900  | 8.94003400  | 2.51859800  |
| H | 6.49333900  | 9.64452500  | 3.34424900  |
| H | 8.51016200  | 2.89400400  | -5.89132100 |
| H | 8.47744600  | 2.75779900  | -4.12359800 |
| O | 0.86182600  | 6.14036100  | 2.13916400  |
| C | -0.57713800 | 6.16801400  | 2.17515600  |
| H | -0.98263700 | 5.50070100  | 1.39897400  |
| H | -0.93046100 | 7.19280500  | 1.96031700  |
| C | -1.06996800 | 5.67533700  | 3.53128700  |
| H | -0.67313400 | 6.30796900  | 4.33971900  |
| H | -0.68026300 | 4.65915000  | 3.68957800  |
| C | -2.61395600 | 5.65493100  | 3.54014600  |
| H | -3.00272300 | 6.67149700  | 3.71910900  |
| H | -2.97164500 | 5.36056900  | 2.53919100  |
| C | -3.22774800 | 4.67067100  | 4.54937600  |
| H | -2.95537100 | 4.95318400  | 5.58064900  |
| H | -2.79499500 | 3.67327600  | 4.37230900  |
| C | -4.75626500 | 4.58669400  | 4.40427600  |
| H | -5.21568500 | 5.53923900  | 4.72165300  |
| H | -4.99983900 | 4.46918600  | 3.33449100  |
| C | -5.39846200 | 3.41817400  | 5.16683300  |
| H | -5.18356100 | 3.49525300  | 6.24635300  |
| H | -4.93596600 | 2.47873200  | 4.82478500  |
| C | -6.91980100 | 3.34748400  | 4.94582200  |
| H | -7.41122900 | 4.15124900  | 5.52167800  |
| H | -7.14408200 | 3.54648400  | 3.88449700  |
| C | 0.49356200  | -6.33460500 | 3.20754400  |
| H | 0.23784500  | -5.67672700 | 2.36513600  |
| H | -0.06524200 | -7.28020200 | 3.09024800  |
| C | 0.13952400  | -5.61130900 | 4.50469700  |
| H | 0.39981900  | -6.23504200 | 5.37375200  |
| H | 0.76157600  | -4.70563400 | 4.55600800  |
| C | -1.35111800 | -5.21552200 | 4.54109500  |

|   |              |             |             |
|---|--------------|-------------|-------------|
| H | -1.97016500  | -6.08938400 | 4.80547000  |
| H | -1.67299300  | -4.90195800 | 3.53440500  |
| C | -1.63021000  | -4.05828000 | 5.51404300  |
| H | -1.29807100  | -4.33402400 | 6.53000300  |
| H | -1.01661000  | -3.19387100 | 5.21239200  |
| C | -3.10938500  | -3.64111000 | 5.55105600  |
| H | -3.71032700  | -4.45905600 | 5.98605800  |
| H | -3.47548900  | -3.50030300 | 4.52216300  |
| C | -3.34427600  | -2.35061200 | 6.35217800  |
| H | -2.89287000  | -2.45799400 | 7.35465700  |
| H | -2.81522100  | -1.51792400 | 5.85998600  |
| C | -4.83199000  | -1.99875500 | 6.51764000  |
| H | -5.34460200  | -2.85457000 | 6.99222500  |
| H | -5.29905200  | -1.86530700 | 5.52724600  |
| C | -5.05651600  | -0.74203700 | 7.37881000  |
| H | -4.77477100  | 0.16162000  | 6.81336500  |
| H | -4.38362300  | -0.78529500 | 8.25363200  |
| C | -7.52659200  | 1.99242000  | 5.33437300  |
| H | -7.15556000  | 1.21613700  | 4.64717400  |
| H | -7.18420000  | 1.71573000  | 6.34238900  |
| C | -9.06894200  | 2.01926100  | 5.31030700  |
| H | -9.42540400  | 2.37743700  | 4.33064200  |
| H | -9.39911800  | 2.76669600  | 6.05685400  |
| C | -6.50781300  | -0.61036900 | 7.89107500  |
| H | -6.77706000  | -1.56831000 | 8.37512000  |
| H | -7.20271300  | -0.47778600 | 7.04738900  |
| C | -12.44337200 | -2.63927700 | 0.04707700  |
| C | -12.21612100 | -3.28754500 | -1.15243800 |
| C | -10.88690100 | -3.39959400 | -1.67792700 |
| C | -9.81306500  | -3.25724600 | -0.74842900 |
| C | -10.05042600 | -2.58382000 | 0.50351600  |
| C | -11.35293300 | -2.07172500 | 0.78421000  |
| C | -8.45296200  | -3.39609400 | -1.19748200 |
| C | -8.17204200  | -3.19130600 | -2.58038200 |
| C | -9.26225900  | -2.85780700 | -3.45818900 |
| C | -10.59984200 | -3.19269400 | -3.08932600 |

|   |              |             |             |
|---|--------------|-------------|-------------|
| C | -9.04071100  | -1.85289000 | -4.46754400 |
| C | -10.16386700 | -1.21491000 | -5.07498200 |
| C | -11.41792700 | -1.90512600 | -4.99947600 |
| C | -11.63031900 | -2.86914200 | -4.03193200 |
| C | -8.91452300  | -2.09028300 | 1.23552800  |
| C | -7.61436700  | -2.64526200 | 0.99849500  |
| C | -7.37648600  | -3.31412400 | -0.25440900 |
| C | -6.03101100  | -3.45884600 | -0.70852600 |
| C | -5.74757400  | -3.25262000 | -2.10419700 |
| C | -6.82367000  | -2.91077900 | -2.97737500 |
| C | -6.60222800  | -1.90818800 | -3.98672200 |
| C | -7.74150800  | -1.23956700 | -4.54276400 |
| C | -6.49617900  | -2.15556300 | 1.73781500  |
| C | -5.18910900  | -2.69079300 | 1.47966900  |
| C | -4.95176000  | -3.35445900 | 0.23261200  |
| C | -3.60025600  | -3.50552200 | -0.22303200 |
| C | -3.31616300  | -3.30197000 | -1.62018300 |
| C | -4.39852000  | -2.95305400 | -2.49392400 |
| C | -4.17794600  | -1.95653000 | -3.49835400 |
| C | -5.31550800  | -1.29654800 | -4.07430700 |
| C | -4.06569400  | -2.20005100 | 2.22319700  |
| C | -1.17517800  | -3.54166300 | 0.25858800  |
| C | -0.89228900  | -3.34460800 | -1.13185200 |
| C | -1.97398300  | -3.00814300 | -2.01200900 |
| C | -1.75165500  | -2.00601500 | -3.02171500 |
| C | -2.88325600  | -1.34570200 | -3.59159000 |
| C | -1.64090700  | -2.22978600 | 2.69954800  |
| C | -0.33772800  | -2.76730200 | 2.45024600  |
| C | -0.09948300  | -3.43485400 | 1.19984400  |
| C | 1.24584700   | -3.57797200 | 0.74894300  |
| C | 1.52862100   | -3.38788600 | -0.64506100 |
| C | 0.45529400   | -3.05343900 | -1.52344600 |
| C | 0.67821400   | -2.05258000 | -2.53293200 |
| C | -0.45815600  | -1.38893200 | -3.10320300 |
| C | 0.77812300   | -2.28451400 | 3.19747800  |
| C | 2.08333700   | -2.81876400 | 2.93906600  |

|   |             |             |             |
|---|-------------|-------------|-------------|
| C | 2.32006500  | -3.47313600 | 1.69091600  |
| C | 3.66941800  | -3.62523500 | 1.23835500  |
| C | 3.95222300  | -3.44039400 | -0.15432300 |
| C | 2.87424300  | -3.09432500 | -1.03207800 |
| C | 3.09658100  | -2.09995400 | -2.03190800 |
| C | 1.96422400  | -1.43924400 | -2.61159900 |
| C | 3.20779000  | -2.33698500 | 3.68921200  |
| C | 4.50506100  | -2.87149500 | 3.42773600  |
| C | 4.73994200  | -3.53313400 | 2.17412200  |
| C | 6.08885800  | -3.68030100 | 1.71757600  |
| C | 6.36974800  | -3.49233600 | 0.33225200  |
| C | 5.29210400  | -3.15810200 | -0.54758700 |
| C | 5.51654400  | -2.15946700 | -1.55658000 |
| C | 4.39078400  | -1.49221800 | -2.12026900 |
| C | 5.63537500  | -2.37143700 | 4.15380600  |
| C | 6.94345300  | -2.91624500 | 3.90608600  |
| C | 7.17603800  | -3.59439000 | 2.65484700  |
| C | 8.51690000  | -3.79610600 | 2.20837000  |
| C | 8.80357600  | -3.59993200 | 0.79445400  |
| C | 7.72639100  | -3.21736800 | -0.05988200 |
| C | 7.95198100  | -2.21393100 | -1.07044700 |
| C | 6.80685500  | -1.54606500 | -1.62992100 |
| C | 8.05913100  | -2.45732500 | 4.66917100  |
| C | 9.32336900  | -3.07790300 | 4.40239100  |
| C | 9.54575800  | -3.73106600 | 3.20431800  |
| C | 9.24693200  | -1.62631200 | -1.19409100 |
| C | 10.34584300 | -2.36539900 | -0.64606200 |
| C | 10.12969100 | -3.32831900 | 0.32234300  |
| C | 6.88243700  | -0.14249900 | -1.85344700 |
| C | 8.09998600  | 0.53840800  | -1.50923800 |
| C | 9.32418400  | -0.18962700 | -1.42246900 |
| C | 4.46989900  | -0.08015400 | -2.35658500 |
| C | 5.67054700  | 0.60189200  | -2.00958800 |
| C | 5.57106800  | 1.88842600  | -1.38007300 |
| C | 6.68620900  | 2.34931000  | -0.61428400 |
| C | 7.99799100  | 1.82407800  | -0.87032600 |

|   |             |             |             |
|---|-------------|-------------|-------------|
| C | 9.12431000  | 2.35635800  | -0.17549100 |
| C | 10.40525600 | 1.80909300  | -0.51317800 |
| C | 10.50222800 | 0.56819300  | -1.11836900 |
| C | 6.45016700  | 3.02092800  | 0.61510700  |
| C | 7.53727700  | 3.14499900  | 1.54653900  |
| C | 8.88378400  | 3.04783000  | 1.08387800  |
| C | 4.27914800  | 2.44187300  | -1.14035900 |
| C | 4.03714400  | 3.10115900  | 0.11304000  |
| C | 5.10145500  | 3.20122900  | 1.05621200  |
| C | 4.81605100  | 3.00946100  | 2.45399500  |
| C | 5.89816500  | 2.65857500  | 3.32722800  |
| C | 7.25325600  | 2.95621200  | 2.94577500  |
| C | 8.32675600  | 2.66012300  | 3.83787300  |
| C | 9.64428200  | 3.02630700  | 3.40635500  |
| C | 9.91561300  | 3.21697700  | 2.06422500  |
| C | 5.68043400  | 1.66560800  | 4.32686600  |
| C | 6.82630600  | 1.01070600  | 4.90119700  |
| C | 8.10465800  | 1.64439300  | 4.85591500  |
| C | 3.47555000  | 2.71410300  | 2.84196800  |
| C | 3.25439000  | 1.71765600  | 3.85669000  |
| C | 4.38553000  | 1.05859700  | 4.42661300  |
| C | 4.31136300  | -0.35971100 | 4.66275100  |
| C | 5.53725900  | -1.09445600 | 4.77995200  |
| C | 6.75310200  | -0.41048300 | 5.13128500  |
| C | 7.96016800  | -1.15262400 | 5.30601800  |
| C | 9.12258400  | -0.41188800 | 5.69960200  |
| C | 9.19264300  | 0.95121900  | 5.48118300  |
| C | 3.10822700  | -1.04914900 | 4.32297000  |
| C | 2.68304000  | 3.23667500  | 0.56410800  |
| C | 2.39744100  | 3.03609600  | 1.95154900  |
| C | 3.15569200  | 1.95083600  | -1.88681500 |
| C | 3.25230200  | 0.66368600  | -2.50279100 |
| C | 1.96146800  | 1.09990900  | 3.94150400  |
| C | 1.88594000  | -0.30956400 | 4.18176700  |
| C | 1.61234400  | 3.14722900  | -0.38247100 |
| C | 1.85207400  | 2.49563200  | -1.64045300 |



|   |             |             |             |
|---|-------------|-------------|-------------|
| C | 2.04475300  | -0.02391500 | -2.85923800 |
| C | 1.05120100  | 2.74528600  | 2.34257600  |
| C | 0.82499700  | 1.76003800  | 3.36640700  |
| C | 0.67572800  | -1.00156900 | 3.84037200  |
| C | 0.26613000  | 3.28661900  | 0.06915000  |
| C | -0.01972700 | 3.06966700  | 1.45845000  |
| C | 0.73202900  | 2.00733700  | -2.38258600 |
| C | 0.82989700  | 0.71437200  | -3.00712200 |
| C | -0.46285400 | 1.14939600  | 3.45724500  |
| C | -0.54030400 | -0.26623600 | 3.70189600  |
| C | -0.81003400 | 3.19833700  | -0.87336300 |
| C | -0.57365500 | 2.54338800  | -2.12453600 |
| C | -0.38130200 | 0.02177900  | -3.34463200 |
| C | -1.36736500 | 2.77839100  | 1.84649300  |
| C | -1.59433500 | 1.79958600  | 2.86431800  |
| C | -1.74495300 | -0.95597000 | 3.34045200  |
| C | -2.16157700 | 3.35228200  | -0.41913800 |
| C | -2.44630500 | 3.13475200  | 0.97462000  |
| C | -1.70114900 | 2.05447000  | -2.86560000 |
| C | -1.60269400 | 0.76148600  | -3.49077600 |
| C | -2.88995300 | 1.19236000  | 2.95572300  |
| C | -2.96892600 | -0.22138800 | 3.20551400  |
| C | -3.23549800 | 3.26341300  | -1.35744500 |
| C | -2.99939900 | 2.59521700  | -2.61077100 |
| C | -2.80715200 | 0.07224900  | -3.83145300 |
| C | -3.78950200 | 2.84818600  | 1.36596200  |
| C | -4.01487300 | 1.84827000  | 2.37352200  |
| C | -4.16889800 | -0.91215700 | 2.85873700  |
| C | -4.58738400 | 3.40482400  | -0.89869100 |
| C | -4.86917300 | 3.19521700  | 0.48967700  |
| C | -4.12834200 | 2.09662500  | -3.34188600 |
| C | -4.03010400 | 0.81063100  | -3.96405900 |
| C | -5.30725200 | 1.23490400  | 2.45590700  |
| C | -5.38722000 | -0.17180200 | 2.70653800  |
| C | -5.66793400 | 3.31375500  | -1.83964000 |
| C | -5.43269300 | 2.64249000  | -3.09049100 |

|   |              |             |             |
|---|--------------|-------------|-------------|
| C | -5.24004600  | 0.12049600  | -4.31215100 |
| C | -6.21878100  | 2.90726300  | 0.88452200  |
| C | -6.44160600  | 1.90063200  | 1.88730300  |
| C | -6.59705800  | -0.86376900 | 2.36501300  |
| C | -7.01281100  | 3.46003300  | -1.38282000 |
| C | -7.29501400  | 3.25392700  | 0.01408400  |
| C | -6.55454100  | 2.14911700  | -3.82229100 |
| C | -6.45546900  | 0.85662900  | -4.44898500 |
| C | -7.72806600  | 1.29105800  | 1.97464900  |
| C | -7.80792400  | -0.12471200 | 2.21696900  |
| C | -8.09295700  | 3.34485300  | -2.31771400 |
| C | -7.86001700  | 2.67842700  | -3.55673200 |
| C | -7.66714100  | 0.16500000  | -4.77693300 |
| C | -8.64055300  | 2.94649900  | 0.39973000  |
| C | -8.85963300  | 1.94988200  | 1.39581400  |
| C | -9.01130900  | -0.80949900 | 1.85214000  |
| C | -9.45125600  | 3.49837900  | -1.86778800 |
| C | -9.73328600  | 3.29468000  | -0.46887800 |
| C | -8.99491600  | 2.19290200  | -4.29583500 |
| C | -8.89536300  | 0.89963600  | -4.92456000 |
| C | -10.16148000 | 1.34502000  | 1.48344300  |
| C | -10.23789600 | -0.07484700 | 1.71212700  |
| C | -10.52228700 | 3.44313500  | -2.80973400 |
| C | -10.28452800 | 2.76346400  | -4.07429200 |
| C | -10.08849500 | 0.21869800  | -5.31189800 |
| C | -11.07685500 | 3.04363500  | -0.05640900 |
| C | -11.29990600 | 2.03022300  | 0.96394200  |
| C | -11.45032400 | -0.76567400 | 1.41680500  |
| C | -11.84527400 | 3.64740100  | -2.29689700 |
| C | -12.11565400 | 3.45295900  | -0.95518800 |
| C | -11.36009200 | 2.26081100  | -4.87761300 |
| C | -11.26450400 | 1.02076900  | -5.48084800 |
| C | -12.57079100 | 1.38880800  | 1.13418400  |
| C | -12.64369000 | 0.02532300  | 1.35393300  |
| C | -2.52758000  | -3.40276200 | 0.71467500  |
| C | -2.76527700  | -2.73004100 | 1.96378500  |

|   |              |             |             |
|---|--------------|-------------|-------------|
| H | 10.47381000  | 2.99513300  | 4.11213500  |
| H | 10.95159400  | 3.33258000  | 1.74691900  |
| H | 10.01924200  | -0.94084500 | 6.02113000  |
| H | 10.14289400  | 1.46145000  | 5.63568900  |
| H | 10.55807600  | -4.05084300 | 2.95906800  |
| H | 10.16604100  | -2.90028300 | 5.06987000  |
| H | 11.31297800  | 2.28801600  | -0.14712400 |
| H | 11.48373900  | 0.10373000  | -1.20997300 |
| H | 11.36844200  | -2.05975300 | -0.86594700 |
| H | 10.98766900  | -3.75712500 | 0.83916300  |
| H | -12.67658100 | 3.79562700  | -2.98541100 |
| H | -13.15278500 | 3.45207000  | -0.62123700 |
| H | -13.48811100 | 1.93962000  | 0.92854100  |
| H | -13.61689800 | -0.46321400 | 1.31718300  |
| H | -13.46919100 | -2.42069000 | 0.34232600  |
| H | -13.06891800 | -3.56375900 | -1.77177000 |
| H | -12.63735200 | -3.26005900 | -3.88981100 |
| H | -12.26304000 | -1.56100400 | -5.59488600 |
| H | -12.15130400 | 0.59135800  | -5.94598200 |
| H | -12.31971300 | 2.77678400  | -4.88319800 |
| C | -6.67575900  | 0.50489900  | 8.89399800  |
| H | -5.89607100  | 0.56079800  | 9.66296500  |
| C | -7.67804600  | 1.39623200  | 8.92398800  |
| H | -8.47946800  | 1.37966200  | 8.18325100  |
| H | -7.73285900  | 2.16606200  | 9.69584200  |
| C | -9.70213400  | 0.68597900  | 5.62232100  |
| H | -9.26542500  | 0.13099800  | 6.45980000  |
| C | -10.74247800 | 0.15507200  | 4.96378900  |
| H | -11.20733100 | 0.67572400  | 4.12484500  |
| H | -11.16147500 | -0.81491800 | 5.23797200  |

**UP-9-(6,6)**

|   |             |             |             |
|---|-------------|-------------|-------------|
| C | 1.47494000  | 1.05194600  | -7.21926300 |
| C | -0.49956700 | 2.45222500  | -7.25304600 |
| C | 0.67401500  | -0.08385200 | -7.02244400 |
| H | 2.56033100  | 0.94221200  | -7.27636200 |

|   |             |              |             |
|---|-------------|--------------|-------------|
| C | -1.29767800 | 1.32374200   | -7.04339500 |
| H | -0.94976400 | 3.44117600   | -7.33456600 |
| H | 1.12944000  | -1.06614300  | -6.91468800 |
| H | -2.37981100 | 1.43570900   | -6.95040900 |
| C | -2.42477400 | -6.85951400  | -2.44914300 |
| C | -4.41578600 | -7.30862800  | -3.91620100 |
| C | -3.27618500 | -6.58709800  | -3.63449200 |
| C | -2.73039700 | -5.54069500  | -4.53054200 |
| C | -3.52372200 | -4.59287800  | -5.20372800 |
| C | -0.75348600 | -4.34243100  | -5.33344400 |
| C | -2.96595400 | -3.53957500  | -5.93995000 |
| H | -4.60516900 | -4.61425200  | -5.08636400 |
| H | 0.31960800  | -4.16457100  | -5.31908800 |
| H | -3.61882500 | -2.80604000  | -6.40645400 |
| C | -0.72286000 | 0.04108000   | -6.95992100 |
| C | -1.56885000 | -3.38905300  | -5.96326900 |
| C | -1.65146000 | -1.14874200  | -6.83182500 |
| H | -2.19626500 | -1.31371800  | -7.78090600 |
| H | -2.40324500 | -0.94980200  | -6.05227100 |
| O | -0.89981900 | -2.32267900  | -6.50421800 |
| C | -1.30848700 | -5.42827200  | -4.64401700 |
| C | -0.47094400 | -6.42481300  | -3.94267600 |
| C | 0.65284300  | -6.98202900  | -4.51213400 |
| S | 1.26105700  | -6.56665900  | -6.15384400 |
| S | 1.60599000  | -8.31117300  | -3.76492900 |
| C | 2.40403400  | -7.89938100  | -6.27466800 |
| H | 2.94547200  | -8.00826300  | -7.21227800 |
| C | 2.56049100  | -8.68843000  | -5.19447900 |
| H | 3.24732600  | -9.52977900  | -5.12776500 |
| S | -5.37878900 | -7.11349500  | -5.42340000 |
| C | -6.20644400 | -9.25662300  | -4.07270100 |
| H | -6.76116100 | -10.15497700 | -3.80922900 |
| S | -5.04065600 | -8.65619100  | -2.89909900 |
| C | -6.35961000 | -8.55925100  | -5.21456700 |
| H | -7.05658000 | -8.80876000  | -6.01210800 |
| C | -2.11218900 | -7.39653300  | -0.08039400 |

|   |             |             |             |
|---|-------------|-------------|-------------|
| C | -1.00723500 | -6.81409300 | -2.62329000 |
| C | -0.18446100 | -7.07907600 | -1.50908400 |
| H | 0.89428000  | -6.96663900 | -1.59864800 |
| C | -0.71694500 | -7.39168100 | -0.26163400 |
| H | -0.07356200 | -7.55467500 | 0.60152400  |
| C | -2.95828400 | -7.12870000 | -1.17151300 |
| H | -4.03166600 | -7.06257900 | -1.01520700 |
| O | -2.52952900 | -7.62773900 | 1.19882500  |
| C | -1.12989400 | 7.37424700  | 0.19406800  |
| C | -0.28915300 | 7.82135400  | -2.47017300 |
| C | 0.16032700  | 6.98661900  | -0.21881900 |
| H | 0.77978900  | 6.46384500  | 0.50408500  |
| C | -2.01090900 | 7.96631300  | -0.72994300 |
| H | -3.02231000 | 8.24760100  | -0.44860300 |
| C | -1.58004100 | 8.17341900  | -2.04520200 |
| H | -2.28466100 | 8.58514500  | -2.76728600 |
| C | 0.59856400  | 7.19296400  | -1.53718100 |
| C | 1.90895000  | 6.72339700  | -2.05713400 |
| C | 0.16631000  | 8.00343200  | -3.86651800 |
| C | 0.93439800  | 6.84463700  | -4.36749600 |
| C | 1.82854700  | 6.21256000  | -3.45013400 |
| C | 0.76421400  | 6.30991600  | -5.65286400 |
| H | 0.04497000  | 6.74277200  | -6.34600000 |
| C | 2.50284500  | 5.05868500  | -3.88090100 |
| H | 3.15384900  | 4.53611200  | -3.18951400 |
| C | 2.33349000  | 4.51934100  | -5.16109200 |
| H | 2.84061700  | 3.59136100  | -5.41368900 |
| C | 1.46928300  | 5.16338400  | -6.06224200 |
| O | 1.23898300  | 4.77367000  | -7.36090800 |
| C | 0.89718500  | 2.32244600  | -7.37139400 |
| C | 1.74799300  | 3.50591300  | -7.79994100 |
| C | -0.02881700 | 9.15677100  | -4.58470300 |
| C | 3.09323000  | 6.78954900  | -1.35712900 |
| S | 0.60450600  | 9.42933700  | -6.24674300 |
| S | -0.83390400 | 10.62309500 | -3.92060200 |
| S | 3.24969700  | 7.34107400  | 0.34411900  |

|   |             |             |             |
|---|-------------|-------------|-------------|
| S | 4.69508600  | 6.42237700  | -2.08879800 |
| C | -0.35947400 | 11.70113300 | -5.23052000 |
| H | -0.63071700 | 12.75078600 | -5.13643600 |
| C | 0.28991700  | 11.16217500 | -6.28033700 |
| H | 0.62065900  | 11.71223800 | -7.15911100 |
| C | 5.65306700  | 6.78446800  | -0.66432600 |
| H | 6.72728400  | 6.62645900  | -0.73132300 |
| C | 4.99960200  | 7.20107500  | 0.43778700  |
| H | 5.46896800  | 7.44223900  | 1.38917600  |
| H | 1.73111300  | 3.58772900  | -8.89753100 |
| H | 2.80009200  | 3.36964800  | -7.49825900 |
| O | -1.45073300 | 7.09984000  | 1.49804300  |
| C | -2.82983500 | 7.28025900  | 1.87000100  |
| H | -3.46952200 | 6.74885300  | 1.14505700  |
| H | -3.08965100 | 8.35363500  | 1.83014900  |
| C | -3.06364000 | 6.70839800  | 3.26321900  |
| H | -2.52629900 | 7.30291600  | 4.01840000  |
| H | -2.65334000 | 5.69052700  | 3.29641100  |
| C | -4.57243200 | 6.66480000  | 3.56233900  |
| H | -4.97607400 | 7.69027900  | 3.62586800  |
| H | -5.08343600 | 6.18315300  | 2.71161700  |
| C | -4.93754900 | 5.87977200  | 4.83112100  |
| H | -4.48667500 | 6.35182300  | 5.72041600  |
| H | -4.49849800 | 4.87228200  | 4.75540100  |
| C | -6.46285800 | 5.75310800  | 5.00501700  |
| H | -6.88263000 | 6.70976900  | 5.36113700  |
| H | -6.91627500 | 5.56500100  | 4.01819400  |
| C | -6.88073100 | 4.61052700  | 5.94171100  |
| H | -6.47302600 | 4.77623200  | 6.95422100  |
| H | -6.42603200 | 3.67631800  | 5.57348800  |
| C | -8.40454200 | 4.42305800  | 6.01896400  |
| H | -8.86481500 | 5.29393900  | 6.51836600  |
| H | -8.81716600 | 4.39320300  | 4.99678100  |
| C | -3.87305600 | -7.28280500 | 1.59374500  |
| H | -4.21146100 | -6.38828800 | 1.04790900  |
| H | -4.55967800 | -8.11494600 | 1.35717400  |

|   |              |             |             |
|---|--------------|-------------|-------------|
| C | -3.81128700  | -6.97694100 | 3.08895700  |
| H | -3.45243900  | -7.86364800 | 3.63399200  |
| H | -3.04829400  | -6.19369900 | 3.21616300  |
| C | -5.14782700  | -6.47574300 | 3.66830700  |
| H | -5.83101400  | -7.31965200 | 3.86115600  |
| H | -5.64685700  | -5.83161600 | 2.92734200  |
| C | -4.92778300  | -5.64769500 | 4.94685400  |
| H | -4.51787500  | -6.28484900 | 5.74901400  |
| H | -4.15198000  | -4.89662400 | 4.72485400  |
| C | -6.18445900  | -4.90697800 | 5.43696900  |
| H | -6.88013800  | -5.60489100 | 5.93324900  |
| H | -6.72023700  | -4.50464000 | 4.56307300  |
| C | -5.83829300  | -3.73881300 | 6.37531500  |
| H | -5.39962800  | -4.12306300 | 7.31255600  |
| H | -5.05306100  | -3.13132800 | 5.89555500  |
| C | -7.03000800  | -2.82397700 | 6.69531200  |
| H | -7.78907700  | -3.37824100 | 7.27443400  |
| H | -7.51627800  | -2.51910000 | 5.75489700  |
| C | -6.59796800  | -1.56940100 | 7.46858200  |
| H | -5.84801800  | -1.02425000 | 6.87095900  |
| H | -6.09799300  | -1.86348700 | 8.40672000  |
| C | -8.79512800  | 3.13223000  | 6.74958400  |
| H | -8.37160600  | 2.27441500  | 6.20491100  |
| H | -8.34528800  | 3.11160000  | 7.75424400  |
| C | -10.32222800 | 2.94422200  | 6.87433600  |
| H | -10.79237800 | 3.06969300  | 5.88560000  |
| H | -10.71790700 | 3.74784800  | 7.52288000  |
| C | -7.77078100  | -0.61997300 | 7.79860300  |
| H | -8.52257400  | -1.15365700 | 8.40336400  |
| H | -8.26759700  | -0.32553200 | 6.85810500  |
| H | -10.55108800 | 3.30808000  | -3.95709600 |
| H | -10.59107700 | 1.07674400  | -4.92108000 |
| H | -10.74127000 | -1.04613800 | -4.69660100 |
| H | -11.00625400 | -2.99572200 | -3.26850600 |
| H | -11.25945900 | -3.83596200 | -1.31434100 |
| H | -11.48773800 | -3.54791600 | 1.08884900  |

|   |              |             |             |
|---|--------------|-------------|-------------|
| H | -10.64067200 | 4.59462100  | -2.24570600 |
| H | -10.86251500 | 4.87604500  | 0.15902000  |
| H | -11.11018900 | 4.03780700  | 2.11759000  |
| H | -11.38034200 | 2.08662900  | 3.54641400  |
| H | -11.54231200 | -0.04171800 | 3.78140500  |
| H | -11.58382600 | -2.27058800 | 2.80857200  |
| C | -9.62003100  | 2.74562800  | -4.01530600 |
| C | -9.64277500  | 1.47601300  | -4.56345000 |
| C | -9.85520400  | -1.48602200 | -4.24053400 |
| C | -10.00590300 | -2.59528800 | -3.42844600 |
| C | -10.35780500 | -3.77156300 | -0.70648800 |
| C | -10.48787200 | -3.60728100 | 0.66070400  |
| C | -9.74662200  | 4.53372800  | -1.62638800 |
| C | -9.87299300  | 4.69384000  | -0.25836900 |
| C | -10.22017400 | 3.51519200  | 2.46555400  |
| C | -10.37452900 | 2.40635700  | 3.27873100  |
| C | -10.59918400 | -0.55631100 | 3.60786700  |
| C | -10.62169100 | -1.82355000 | 3.05534600  |
| C | -8.44552800  | 3.24611800  | -3.36970900 |
| C | -8.49266300  | 0.62754700  | -4.49943700 |
| C | -8.59613900  | -0.81394900 | -4.33983400 |
| C | -8.90693400  | -3.10159300 | -2.66507800 |
| C | -9.07864500  | -3.67565400 | -1.34028800 |
| C | -9.34653700  | -3.33548600 | 1.47936100  |
| C | -8.50730800  | 4.11552100  | -2.20615000 |
| C | -8.76783800  | 4.44349700  | 0.61472200  |
| C | -8.93748900  | 3.86626300  | 1.93853000  |
| C | -9.25598400  | 1.58424700  | 3.61987600  |
| C | -9.36574500  | 0.14556000  | 3.78664700  |
| C | -9.41183000  | -2.46734300 | 2.64373800  |
| C | -7.21567100  | 2.57684600  | -3.65241800 |
| C | -7.24004600  | 1.25504400  | -4.22059900 |
| C | -7.44142400  | -1.53478500 | -3.90663400 |
| C | -7.59811500  | -2.69027500 | -3.06263200 |
| C | -7.92967500  | -3.80320600 | -0.50160000 |
| C | -8.06508200  | -3.62855800 | 0.92038000  |



|   |             |             |             |
|---|-------------|-------------|-------------|
| C | -7.33574100 | 4.25592400  | -1.40109000 |
| C | -7.46816900 | 4.41755700  | 0.02243500  |
| C | -7.79708500 | 3.29516300  | 2.58032900  |
| C | -7.95848100 | 2.14861900  | 3.43144100  |
| C | -8.16952200 | -0.63256000 | 3.75437900  |
| C | -8.19184600 | -1.94798300 | 3.17287300  |
| C | -5.98693900 | 3.06118700  | -3.08255500 |
| C | -6.03483800 | 0.47131000  | -4.19199200 |
| C | -6.13731500 | -0.94102400 | -4.02878000 |
| C | -6.44446900 | -3.20505300 | -2.37506100 |
| C | -6.61275900 | -3.77060600 | -1.07809900 |
| C | -6.87756100 | -3.42686400 | 1.70488900  |
| C | -6.04772100 | 3.91093700  | -1.94073200 |
| C | -6.30689300 | 4.21924500  | 0.84687300  |
| C | -6.47432500 | 3.64652300  | 2.14027100  |
| C | -6.79120200 | 1.40560200  | 3.81811200  |
| C | -6.89807000 | -0.00388900 | 3.98533900  |
| C | -6.94139600 | -2.57415800 | 2.84297700  |
| C | -4.74432400 | 2.43259800  | -3.41819900 |
| C | -4.77074900 | 1.11095100  | -3.98047000 |
| C | -4.97455400 | -1.68564100 | -3.65015600 |
| C | -5.13030000 | -2.84010500 | -2.80991400 |
| C | -5.46232200 | -3.95985000 | -0.24615900 |
| C | -5.59715000 | -3.78111500 | 1.17202200  |
| C | -4.86491500 | 4.11081700  | -1.15775900 |
| C | -4.99899300 | 4.26039000  | 0.26460400  |
| C | -5.33183800 | 3.12978600  | 2.82758500  |
| C | -5.49267800 | 1.99464400  | 3.69074700  |
| C | -5.70363200 | -0.79292900 | 4.01783800  |
| C | -5.72566100 | -2.10068100 | 3.43063400  |
| C | -3.52601500 | 2.92361200  | -2.85659300 |
| C | -3.57814900 | 0.32679900  | -3.95560600 |
| C | -3.68451500 | -1.09247400 | -3.77659000 |
| C | -3.99014900 | -3.35646000 | -2.12612800 |
| C | -4.15825800 | -3.92602100 | -0.82280600 |
| C | -4.42505200 | -3.59064800 | 1.96319100  |

|   |             |             |             |
|---|-------------|-------------|-------------|
| C | -3.58783500 | 3.77656300  | -1.70307100 |
| C | -3.85200500 | 4.06560800  | 1.09121200  |
| C | -4.02278200 | 3.49074400  | 2.39331200  |
| C | -4.33838800 | 1.25725300  | 4.09144600  |
| C | -4.44510600 | -0.16420700 | 4.26005000  |
| C | -4.49075100 | -2.73998300 | 3.11411100  |
| C | -2.28417400 | 2.27937600  | -3.17896600 |
| C | -2.31170800 | 0.96209400  | -3.73310100 |
| C | -2.52150700 | -1.83263600 | -3.38576500 |
| C | -2.67685300 | -2.97717800 | -2.55053200 |
| C | -3.00611300 | -4.09489600 | 0.01308200  |
| C | -3.14145400 | -3.93185500 | 1.42458900  |
| C | -2.40664400 | 3.95394200  | -0.90748800 |
| C | -2.54220600 | 4.09512500  | 0.50875700  |
| C | -2.87896600 | 2.97239400  | 3.08435000  |
| C | -3.03752700 | 1.84308600  | 3.94634000  |
| C | -3.24680300 | -0.95384500 | 4.27659500  |
| C | -3.27042400 | -2.26125400 | 3.69754600  |
| C | -1.06164100 | 2.76568300  | -2.61063400 |
| C | -1.11806100 | 0.17011600  | -3.71438900 |
| C | -1.22549500 | -1.24720900 | -3.53649700 |
| C | -1.53313400 | -3.50413600 | -1.87433000 |
| C | -1.69966300 | -4.06535000 | -0.56835300 |
| C | -1.96568300 | -3.75802200 | 2.22409700  |
| C | -1.12546800 | 3.61365400  | -1.45295800 |
| C | -1.39545400 | 3.90960200  | 1.34463100  |
| C | -1.56497500 | 3.34429100  | 2.65300400  |
| C | -1.87627800 | 1.10294100  | 4.34489200  |
| C | -1.98196700 | -0.32016800 | 4.51221100  |
| C | -2.03037100 | -2.90771500 | 3.38023100  |
| C | 0.17073000  | 2.11479900  | -2.92737600 |
| C | 0.14391300  | 0.79868600  | -3.49780700 |
| C | -0.07010700 | -1.99618500 | -3.16373000 |
| C | -0.22674000 | -3.13930700 | -2.31359400 |
| C | -0.55485700 | -4.24768300 | 0.25981900  |
| C | -0.68896000 | -4.09538700 | 1.67912900  |

|   |             |             |             |
|---|-------------|-------------|-------------|
| C | 0.04411700  | 3.77980200  | -0.65277500 |
| C | -0.09288700 | 3.93305500  | 0.76610500  |
| C | -0.42519400 | 2.83423900  | 3.34589800  |
| C | -0.58231800 | 1.69180000  | 4.20162900  |
| C | -0.78845500 | -1.10656900 | 4.52562600  |
| C | -0.81310500 | -2.42335200 | 3.95201500  |
| C | 1.38752900  | 2.58058800  | -2.33550400 |
| C | 1.33534500  | 0.00193600  | -3.48155500 |
| C | 1.22859400  | -1.41531800 | -3.31735600 |
| C | 0.91754500  | -3.66398100 | -1.63339200 |
| C | 0.75167600  | -4.21853600 | -0.32649800 |
| C | 0.49163600  | -3.90877600 | 2.47012500  |
| C | 1.32424600  | 3.42852000  | -1.18793600 |
| C | 1.05634500  | 3.75897200  | 1.60302600  |
| C | 0.88926700  | 3.20212600  | 2.90964800  |
| C | 0.58177200  | 0.94833200  | 4.58650500  |
| C | 0.47760100  | -0.46959000 | 4.74838600  |
| C | 0.42916900  | -3.05986100 | 3.62024400  |
| C | 2.62510000  | 1.93448300  | -2.65633500 |
| C | 2.60202600  | 0.62921700  | -3.24885900 |
| C | 2.39062300  | -2.16784500 | -2.93881700 |
| C | 2.23219200  | -3.31017000 | -2.08154600 |
| C | 1.90324000  | -4.41429800 | 0.50105800  |
| C | 1.77186300  | -4.25268100 | 1.92300300  |
| C | 2.49957200  | 3.61838900  | -0.39395100 |
| C | 2.36576900  | 3.79639500  | 1.02339000  |
| C | 2.03595400  | 2.69044000  | 3.60124400  |
| C | 1.88008400  | 1.54262900  | 4.45050400  |
| C | 1.67574500  | -1.25742000 | 4.76588700  |
| C | 1.65111600  | -2.57397100 | 4.19232700  |
| C | 3.83903100  | 2.41221400  | -2.07774300 |
| C | 3.79408300  | -0.15914200 | -3.23615100 |
| C | 3.68715700  | -1.58368700 | -3.07992500 |
| C | 3.37356200  | -3.83389800 | -1.39946100 |
| C | 3.20611400  | -4.39424300 | -0.08596300 |
| C | 2.94855100  | -4.06637600 | 2.71071700  |

|   |            |             |             |
|---|------------|-------------|-------------|
| C | 3.77523500 | 3.27025400  | -0.92901700 |
| C | 3.51294400 | 3.62538900  | 1.85651200  |
| C | 3.34597000 | 3.06168000  | 3.16699500  |
| C | 3.03979000 | 0.80173100  | 4.83481800  |
| C | 2.93578200 | -0.62251900 | 4.99350700  |
| C | 2.88721900 | -3.21150200 | 3.86423800  |
| C | 5.07940900 | 1.77857200  | -2.40674200 |
| C | 5.05674000 | 0.47321300  | -2.99030000 |
| C | 4.84807600 | -2.32724600 | -2.68525900 |
| C | 4.68936300 | -3.46754200 | -1.83567800 |
| C | 4.35940000 | -4.57200200 | 0.74683200  |
| C | 4.22912400 | -4.40413700 | 2.16175700  |
| C | 4.95241300 | 3.46186200  | -0.13850500 |
| C | 4.82097200 | 3.64676600  | 1.27148300  |
| C | 4.49339500 | 2.53826400  | 3.84901100  |
| C | 4.33833400 | 1.39292800  | 4.69170400  |
| C | 4.13397100 | -1.40940100 | 5.00157600  |
| C | 4.10930900 | -2.71997400 | 4.42940700  |
| C | 6.29914900 | 2.27108700  | -1.83556400 |
| C | 6.25557500 | -0.31380200 | -2.97604000 |
| C | 6.14957700 | -1.73720400 | -2.82162800 |
| C | 5.83659300 | -3.99115800 | -1.15044100 |
| C | 5.66898600 | -4.55228800 | 0.16050700  |
| C | 5.41102500 | -4.21820800 | 2.95344800  |
| C | 6.23437500 | 3.12772300  | -0.68524200 |
| C | 5.97584600 | 3.47624500  | 2.10504300  |
| C | 5.80951300 | 2.91131100  | 3.41442000  |
| C | 5.50323900 | 0.64910200  | 5.07723000  |
| C | 5.39937000 | -0.77409300 | 5.23369400  |
| C | 5.35037400 | -3.36203200 | 4.10417300  |
| C | 7.53518300 | 1.63447300  | -2.15730200 |
| C | 7.51260700 | 0.31906700  | -2.73497300 |
| C | 7.30644900 | -2.47716900 | -2.43188900 |
| C | 7.14729100 | -3.62536700 | -1.58343800 |
| C | 6.81756600 | -4.72972800 | 0.99016600  |
| C | 6.68647500 | -4.55886200 | 2.41037800  |

|   |             |             |             |
|---|-------------|-------------|-------------|
| C | 7.40991600  | 3.32556600  | 0.09984300  |
| C | 7.27813800  | 3.50031600  | 1.52064900  |
| C | 6.95230600  | 2.38882900  | 4.09227500  |
| C | 6.79649600  | 1.23778100  | 4.93758200  |
| C | 6.59217900  | -1.55841300 | 5.24381600  |
| C | 6.56715600  | -2.87478100 | 4.66964500  |
| C | 8.75267300  | 2.11446000  | -1.57553700 |
| C | 8.70785800  | -0.46857700 | -2.70326700 |
| C | 8.60369500  | -1.88119800 | -2.55085100 |
| C | 8.29272600  | -4.13517700 | -0.89079200 |
| C | 8.12614800  | -4.69389000 | 0.40898700  |
| C | 7.86826100  | -4.35749000 | 3.19425300  |
| C | 8.68968300  | 2.96937500  | -0.43705200 |
| C | 8.43083600  | 3.30791000  | 2.34864300  |
| C | 8.26622600  | 2.74637800  | 3.64785000  |
| C | 7.96073900  | 0.48895400  | 5.30555200  |
| C | 7.85756300  | -0.92342700 | 5.46004300  |
| C | 7.80822400  | -3.50602000 | 4.33471700  |
| C | 10.00256800 | 1.48199700  | -1.90098400 |
| C | 9.97948100  | 0.16304700  | -2.47538800 |
| C | 9.77462100  | -2.62543600 | -2.17358200 |
| C | 9.61579000  | -3.77782700 | -1.32717500 |
| C | 9.28685200  | -4.88281600 | 1.23689400  |
| C | 9.15529600  | -4.71039300 | 2.65905900  |
| C | 9.87903800  | 3.16868400  | 0.34665900  |
| C | 9.74675700  | 3.34114900  | 1.76914600  |
| C | 9.42172600  | 2.23233900  | 4.33241100  |
| C | 9.26577800  | 1.07933100  | 5.17860600  |
| C | 9.06183100  | -1.70895500 | 5.48342900  |
| C | 9.03656000  | -3.02782300 | 4.90937300  |
| C | 11.22399200 | 2.00217800  | -1.37407800 |
| C | 11.17762800 | -0.61363700 | -2.51069900 |
| C | 11.07166200 | -2.05517700 | -2.35495700 |
| C | 10.75744100 | -4.33990000 | -0.67854600 |
| C | 10.58721400 | -4.91223200 | 0.64678400  |
| C | 10.32606800 | -4.57061700 | 3.46537900  |

|   |              |             |             |
|---|--------------|-------------|-------------|
| C | 11.16001300  | 2.87462300  | -0.21294600 |
| C | 10.89772000  | 3.21568000  | 2.60566100  |
| C | 10.72978200  | 2.64188100  | 3.93078300  |
| C | 10.42066400  | 0.35650700  | 5.60760400  |
| C | 10.31529700  | -1.08480800 | 5.76510200  |
| C | 10.26505600  | -3.69979300 | 4.62776300  |
| C | 12.43379600  | 1.35700800  | -1.78235800 |
| C | 12.41130500  | 0.08846800  | -2.33302200 |
| C | 12.19369500  | -2.87355400 | -2.01172000 |
| C | 12.04122900  | -3.98215800 | -1.19902100 |
| C | 11.69153100  | -5.16029200 | 1.52185200  |
| C | 11.56493500  | -4.99447600 | 2.88900200  |
| C | 12.30276000  | 3.14931900  | 0.60288500  |
| C | 12.17561000  | 3.31475000  | 1.97000500  |
| C | 11.83055200  | 2.13468800  | 4.69089200  |
| C | 11.68062100  | 1.02613100  | 5.50412300  |
| C | 11.46404900  | -1.93515800 | 5.82761800  |
| C | 11.43966100  | -3.20329300 | 5.27620500  |
| H | 13.39594400  | 1.80352200  | -1.53446200 |
| H | 13.35636700  | -0.42613900 | -2.50224600 |
| H | 13.20033500  | -2.54992200 | -2.27360000 |
| H | 12.93234300  | -4.49882400 | -0.84469800 |
| H | 12.68081700  | -5.34695300 | 1.10584300  |
| H | 12.45816200  | -5.05582000 | 3.50945100  |
| H | 13.30183400  | 3.09146900  | 0.17264900  |
| H | 13.07819300  | 3.38203800  | 2.57615500  |
| H | 12.83109500  | 2.53302400  | 4.52707600  |
| H | 12.56740200  | 0.58441600  | 5.95696400  |
| H | 12.41245600  | -1.53834300 | 6.18769600  |
| H | 12.36958400  | -3.76763200 | 5.21837100  |
| C | -7.29793500  | 0.60584400  | 8.53342700  |
| H | -6.60870100  | 1.25294700  | 7.98054800  |
| C | -7.62789100  | 0.92741600  | 9.79337700  |
| H | -8.31014200  | 0.30110700  | 10.37453100 |
| H | -7.23266900  | 1.81963400  | 10.28247700 |
| C | -10.67972400 | 1.59673100  | 7.44565800  |

|   |              |             |            |
|---|--------------|-------------|------------|
| H | -10.19577500 | 1.33951200  | 8.39294300 |
| C | -11.48819900 | 0.70457100  | 6.85503700 |
| H | -11.97432200 | 0.93008300  | 5.90253600 |
| H | -11.69470900 | -0.27154200 | 7.29722300 |

**UP-9-(7,7)**

|   |             |             |             |
|---|-------------|-------------|-------------|
| C | 3.14856600  | 0.08472900  | -7.22360200 |
| C | 0.97271500  | 1.13193500  | -7.38102200 |
| C | 2.55418400  | -1.18241400 | -7.26434400 |
| H | 4.23069000  | 0.16377900  | -7.10364000 |
| C | 0.37860200  | -0.13472200 | -7.41959400 |
| H | 0.35433400  | 2.02736100  | -7.38048200 |
| H | 3.16645000  | -2.07743900 | -7.17518700 |
| H | -0.70966700 | -0.21410000 | -7.45361000 |
| C | 0.79746300  | -7.77031900 | -1.96742400 |
| C | -1.26469000 | -8.56496100 | -3.15672300 |
| C | -0.19526200 | -7.70180800 | -3.06586800 |
| C | 0.13603900  | -6.69588000 | -4.09927300 |
| C | -0.82829500 | -5.91615300 | -4.75985300 |
| C | 1.85928000  | -5.40820700 | -5.26429500 |
| C | -0.48481000 | -4.92221800 | -5.68485200 |
| H | -1.88017600 | -6.03220700 | -4.50599100 |
| H | 2.89879700  | -5.11917300 | -5.40455200 |
| H | -1.27486500 | -4.35088400 | -6.16549200 |
| C | 1.15660800  | -1.30238200 | -7.32574300 |
| C | 0.87235300  | -4.64118200 | -5.91185800 |
| C | 0.44431600  | -2.63710600 | -7.20939500 |
| H | 0.04464900  | -2.97746300 | -8.18263100 |
| H | -0.40566000 | -2.50417300 | -6.52284100 |
| O | 1.35077100  | -3.62815200 | -6.70314000 |
| C | 1.51627700  | -6.45162700 | -4.39170300 |
| C | 2.52677900  | -7.29063500 | -3.70627600 |
| C | 3.63637600  | -7.78984300 | -4.35306000 |
| S | 4.03264500  | -7.46497700 | -6.07821000 |
| S | 4.78824700  | -8.95824800 | -3.61537600 |
| C | 5.28292400  | -8.69535900 | -6.22107900 |

|   |             |              |             |
|---|-------------|--------------|-------------|
| H | 5.73364400  | -8.83632600  | -7.20145800 |
| C | 5.62562600  | -9.37026900  | -5.10719900 |
| H | 6.39480000  | -10.13797100 | -5.05153500 |
| S | -2.39415100 | -8.62328100  | -4.55623400 |
| C | -2.81673700 | -10.70271900 | -2.94302100 |
| H | -3.23094700 | -11.62604000 | -2.54293100 |
| S | -1.61820000 | -9.86573200  | -1.96270600 |
| C | -3.16755000 | -10.14169600 | -4.11590500 |
| H | -3.90768000 | -10.54282800 | -4.80538500 |
| C | 1.39328900  | -8.01845400  | 0.39452400  |
| C | 2.17552800  | -7.61673000  | -2.30627700 |
| C | 3.12806200  | -7.71660500  | -1.27059900 |
| H | 4.17862600  | -7.53200700  | -1.48559200 |
| C | 2.75727100  | -7.93829700  | 0.05356300  |
| H | 3.50124100  | -7.96638900  | 0.84788000  |
| C | 0.42181500  | -7.94112900  | -0.61964000 |
| H | -0.63373500 | -7.95321500  | -0.36143300 |
| O | 1.12868200  | -8.12582700  | 1.72999300  |
| C | 1.41125800  | 7.95451600   | 0.46882200  |
| C | 0.87799500  | 7.56213300   | -2.29567300 |
| C | 2.46815300  | 7.86135800   | -0.45790900 |
| H | 3.48389500  | 7.84295900   | -0.06757600 |
| C | 0.08403800  | 7.90266500   | 0.00798300  |
| H | -0.75474300 | 7.96501100   | 0.69728200  |
| C | -0.15916800 | 7.67735700   | -1.35288800 |
| H | -1.18901800 | 7.51166700   | -1.66217900 |
| C | 2.22481700  | 7.70475500   | -1.82949300 |
| C | 3.31504100  | 7.62367200   | -2.82813000 |
| C | 0.65873500  | 7.23094700   | -3.72236700 |
| C | 1.72704500  | 6.38693600   | -4.31009800 |
| C | 3.07421000  | 6.61896800   | -3.88486900 |
| C | 1.46568000  | 5.34843100   | -5.21736700 |
| H | 0.44400300  | 5.06808200   | -5.46370400 |
| C | 4.09357900  | 5.82913700   | -4.44379200 |
| H | 5.11529200  | 5.93829900   | -4.08508300 |
| C | 3.83652700  | 4.83974300   | -5.39964600 |



|   |             |             |             |
|---|-------------|-------------|-------------|
| H | 4.66626100  | 4.26092800  | -5.79693100 |
| C | 2.50577900  | 4.57394300  | -5.76452300 |
| O | 2.10068100  | 3.56506600  | -6.60097800 |
| C | 2.36583700  | 1.25150400  | -7.24435200 |
| C | 3.05645000  | 2.58489300  | -7.03358700 |
| C | -0.38686000 | 7.72885400  | -4.47043400 |
| C | 4.39540100  | 8.47782200  | -2.81753700 |
| S | -0.62380300 | 7.40101400  | -6.22375600 |
| S | -1.60294700 | 8.89684000  | -3.84424300 |
| S | 4.65139600  | 9.76480100  | -1.58679700 |
| S | 5.64450800  | 8.53475400  | -4.11111000 |
| C | -2.30189600 | 9.30468200  | -5.40652100 |
| H | -3.07485000 | 10.07041300 | -5.42248900 |
| C | -1.85781300 | 8.62819300  | -6.48300700 |
| H | -2.21783700 | 8.76558800  | -7.50067100 |
| C | 6.38002600  | 10.04959700 | -3.59833300 |
| H | 7.17810000  | 10.45207300 | -4.21895100 |
| C | 5.92960800  | 10.60540700 | -2.45725200 |
| H | 6.30976400  | 11.52555600 | -2.01790800 |
| H | 3.55038700  | 2.94683900  | -7.95440800 |
| H | 3.83337000  | 2.43887000  | -6.26787000 |
| O | 1.78755900  | 8.04676700  | 1.77980100  |
| C | 0.79453000  | 7.82566600  | 2.80437000  |
| H | 0.07887300  | 7.05941100  | 2.46995100  |
| H | 0.23803400  | 8.76139000  | 2.98994100  |
| C | 1.51741000  | 7.32205100  | 4.05200300  |
| H | 2.16716900  | 8.11011000  | 4.46357500  |
| H | 2.17137300  | 6.49552400  | 3.73697700  |
| C | 0.53496300  | 6.79688400  | 5.11574700  |
| H | -0.04456400 | 7.62561800  | 5.55616600  |
| H | -0.19392000 | 6.13751900  | 4.61699700  |
| C | 1.24514900  | 5.98341400  | 6.21642600  |
| H | 1.78106900  | 6.65569000  | 6.90743000  |
| H | 2.01441800  | 5.35901700  | 5.73432200  |
| C | 0.29803300  | 5.04711700  | 6.99131000  |
| H | -0.36428700 | 5.62508400  | 7.65814800  |

|   |             |             |            |
|---|-------------|-------------|------------|
| H | -0.35757800 | 4.54567000  | 6.26158300 |
| C | 1.05073700  | 3.95910300  | 7.78022400 |
| H | 1.56904700  | 4.39858700  | 8.64950900 |
| H | 1.83928400  | 3.55246700  | 7.12656700 |
| C | 0.15287300  | 2.79047800  | 8.22947100 |
| H | -0.48214700 | 3.09370000  | 9.07976700 |
| H | -0.53492100 | 2.53220700  | 7.40845000 |
| C | -0.21704000 | -7.92767500 | 2.21384100 |
| H | -0.72418700 | -7.15573500 | 1.61634400 |
| H | -0.78750700 | -8.86876500 | 2.12171400 |
| C | -0.09579500 | -7.45373500 | 3.66068500 |
| H | 0.38974500  | -8.23360900 | 4.26813000 |
| H | 0.57938400  | -6.58488600 | 3.65805700 |
| C | -1.43810200 | -7.03473900 | 4.28779500 |
| H | -2.08435700 | -7.91343800 | 4.45265300 |
| H | -1.97510900 | -6.37559600 | 3.58667500 |
| C | -1.21300700 | -6.26787200 | 5.60443800 |
| H | -0.76351400 | -6.93689900 | 6.35775700 |
| H | -0.46295300 | -5.48556300 | 5.40475200 |
| C | -2.47291800 | -5.58776100 | 6.17499700 |
| H | -3.12052600 | -6.32462400 | 6.67979600 |
| H | -3.06216800 | -5.17495800 | 5.34079300 |
| C | -2.11580700 | -4.43189600 | 7.12723700 |
| H | -1.60654100 | -4.81728700 | 8.02686100 |
| H | -1.37912000 | -3.79523000 | 6.61231500 |
| C | -3.31218200 | -3.55107400 | 7.53288600 |
| H | -3.93275600 | -4.06531500 | 8.28683900 |
| H | -3.95713000 | -3.39410800 | 6.65374700 |
| C | -2.86127200 | -2.18124700 | 8.06610800 |
| H | -2.20712500 | -1.70758100 | 7.31887000 |
| H | -2.24204300 | -2.31439200 | 8.96857400 |
| C | 0.96402800  | 1.53612800  | 8.59368400 |
| H | 1.62535200  | 1.28619200  | 7.74968200 |
| H | 1.62321400  | 1.74644100  | 9.45385300 |
| C | 0.07264400  | 0.31359200  | 8.90495200 |
| H | -0.62962200 | 0.15189400  | 8.07416400 |

|   |             |             |             |
|---|-------------|-------------|-------------|
| H | -0.54224700 | 0.54565800  | 9.79330500  |
| C | 0.87929200  | -0.93606400 | 9.14625100  |
| H | 1.59268300  | -0.89481800 | 9.97773600  |
| C | -3.53539100 | 0.09327100  | 8.92530300  |
| H | -2.94364700 | 0.02095800  | 9.84454700  |
| C | -4.02991900 | -1.21879700 | 8.37141200  |
| H | -4.70404300 | -1.70417100 | 9.10122900  |
| H | -4.61660200 | -1.04624700 | 7.45547700  |
| H | 11.74299400 | 4.55082000  | 2.41985000  |
| H | 11.53954500 | 3.49492200  | 4.59582500  |
| H | 11.37787300 | 1.83868200  | 5.89961200  |
| H | 11.24644800 | -0.52772600 | 6.42313800  |
| H | 11.20202500 | -2.58434200 | 5.93615700  |
| H | 11.23832500 | -4.47505900 | 4.41490100  |
| H | 11.33928000 | -5.39548500 | 2.51489500  |
| H | 11.51635900 | -5.39863700 | 0.09421400  |
| H | 11.90019900 | 4.54685200  | 0.31147700  |
| H | 12.02022500 | 3.49367900  | -1.87158100 |
| H | 12.05205300 | 1.84540500  | -3.19373600 |
| H | 11.99840300 | -0.51601900 | -3.74983300 |
| H | 11.88224700 | -2.57816300 | -3.29793000 |
| H | 11.69439100 | -4.47898400 | -1.80076300 |
| C | 10.74896900 | 4.29929300  | 2.78701500  |
| C | 10.63304500 | 3.69741000  | 4.02719500  |
| C | 10.40385200 | 1.35207900  | 5.87530200  |
| C | 10.32895000 | 0.00336900  | 6.17364300  |
| C | 10.26501400 | -2.91131300 | 5.48762300  |
| C | 10.28566100 | -3.98892600 | 4.62035800  |
| C | 10.43013900 | -5.28815900 | 1.92491200  |
| C | 10.53096300 | -5.29017000 | 0.54520400  |
| C | 10.97116900 | 4.29811100  | -0.19955000 |
| C | 11.03958800 | 3.69761700  | -1.44391900 |
| C | 11.08472500 | 1.36050600  | -3.31738100 |
| C | 11.05414600 | 0.01429000  | -3.63463600 |
| C | 10.88941300 | -2.90679900 | -2.99389900 |
| C | 10.78231300 | -3.99028500 | -2.14049500 |

|   |            |             |             |
|---|------------|-------------|-------------|
| C | 9.61593900 | 4.44935500  | 1.92971000  |
| C | 9.37610700 | 3.20391900  | 4.49406400  |
| C | 9.26487300 | 2.06598500  | 5.39109900  |
| C | 9.10985000 | -0.72319300 | 6.00878000  |
| C | 9.07879200 | -2.13766700 | 5.67669900  |
| C | 9.12164700 | -4.36677900 | 3.88309900  |
| C | 9.19181300 | -4.99565700 | 2.57472600  |
| C | 9.40060600 | -4.99980200 | -0.27902800 |
| C | 9.72372400 | 4.44971900  | 0.48035000  |
| C | 9.86518800 | 3.20754300  | -2.09345300 |
| C | 9.88718700 | 2.07308800  | -3.00192400 |
| C | 9.82391700 | -0.71203400 | -3.65840100 |
| C | 9.74399600 | -2.12977100 | -3.34840500 |
| C | 9.52263200 | -4.37009700 | -1.58325000 |
| C | 8.32616100 | 4.28078800  | 2.52101700  |
| C | 8.20565200 | 3.65402400  | 3.80919100  |
| C | 7.98940900 | 1.44268800  | 5.55321700  |
| C | 7.91145600 | 0.04142100  | 5.86437900  |
| C | 7.85068600 | -2.70784200 | 5.22046900  |
| C | 7.87236200 | -3.82738800 | 4.31899400  |
| C | 8.00922200 | -5.04748400 | 1.77427300  |
| C | 8.11391000 | -5.04969900 | 0.34019600  |
| C | 8.53561000 | 4.28342200  | -0.29556800 |
| C | 8.60680700 | 3.65853200  | -1.58854600 |
| C | 8.64938100 | 1.45221000  | -3.35425100 |
| C | 8.61735700 | 0.05303400  | -3.68491200 |
| C | 8.46216600 | -2.70270400 | -3.08301600 |
| C | 8.35089000 | -3.82846400 | -2.19565500 |
| C | 7.14179200 | 4.48154800  | 1.73145600  |
| C | 6.90452900 | 3.24636100  | 4.26511500  |
| C | 6.79543700 | 2.13138800  | 5.14482500  |
| C | 6.64198900 | -0.62495300 | 5.75907200  |
| C | 6.61132700 | -2.01140900 | 5.43517800  |
| C | 6.65398300 | -4.21371900 | 3.66144800  |
| C | 6.72322800 | -4.82710300 | 2.37781100  |
| C | 6.92958200 | -4.82950600 | -0.44464000 |

|   |            |             |             |
|---|------------|-------------|-------------|
| C | 7.24743400 | 4.48404100  | 0.31085200  |
| C | 7.38720400 | 3.25347700  | -2.23259700 |
| C | 7.40899200 | 2.14076200  | -3.12208400 |
| C | 7.34615900 | -0.61321700 | -3.77363100 |
| C | 7.26779100 | -2.00332600 | -3.47186500 |
| C | 7.04896400 | -4.21633800 | -1.72500000 |
| C | 5.84944500 | 4.38198800  | 2.33935900  |
| C | 5.72910600 | 3.75353200  | 3.62425200  |
| C | 5.51237100 | 1.53836900  | 5.37276200  |
| C | 5.43409200 | 0.14003600  | 5.68587800  |
| C | 5.37299400 | -2.61378500 | 5.04371300  |
| C | 5.39518600 | -3.73046000 | 4.14296400  |
| C | 5.53293200 | -4.94647100 | 1.59191100  |
| C | 5.63739800 | -4.94378800 | 0.16042500  |
| C | 6.05954300 | 4.38820100  | -0.48165500 |
| C | 6.13046100 | 3.76050700  | -1.77056400 |
| C | 6.17322300 | 1.54951400  | -3.53753500 |
| C | 6.14055000 | 0.15292000  | -3.86925100 |
| C | 5.98558900 | -2.60890200 | -3.27238400 |
| C | 5.87478900 | -3.73173600 | -2.38506700 |
| C | 4.67760900 | 4.59733800  | 1.55276900  |
| C | 4.43986800 | 3.35560900  | 4.09133500  |
| C | 4.32970000 | 2.23342700  | 4.97781400  |
| C | 4.17522500 | -0.52818300 | 5.59871500  |
| C | 4.14388800 | -1.92423900 | 5.27384900  |
| C | 4.18759700 | -4.12836800 | 3.49419500  |
| C | 4.25831200 | -4.74043000 | 2.19994100  |
| C | 4.46545500 | -4.73139900 | -0.62501100 |
| C | 4.78385200 | 4.60119500  | 0.12250600  |
| C | 4.92440900 | 3.36139900  | -2.41872900 |
| C | 4.94675400 | 2.24391900  | -3.31437300 |
| C | 4.88171800 | -0.51393600 | -3.96704500 |
| C | 4.80315100 | -1.91526700 | -3.67134000 |
| C | 4.58493400 | -4.12810500 | -1.91911000 |
| C | 3.38331500 | 4.47599000  | 2.15755600  |
| C | 3.26379100 | 3.84871800  | 3.43638300  |

|   |            |             |             |
|---|------------|-------------|-------------|
| C | 3.04622100 | 1.63051000  | 5.19227100  |
| C | 2.96736000 | 0.23910200  | 5.50857200  |
| C | 2.90507000 | -2.52122500 | 4.86583700  |
| C | 2.92760600 | -3.63289400 | 3.96763000  |
| C | 3.06905100 | -4.83994200 | 1.40678600  |
| C | 3.17392500 | -4.82861100 | -0.01461700 |
| C | 3.59405500 | 4.48266800  | -0.66835200 |
| C | 3.66520200 | 3.85819300  | -1.94907100 |
| C | 3.70829400 | 1.64461000  | -3.71569800 |
| C | 3.67436100 | 0.25489800  | -4.03744100 |
| C | 3.51804100 | -2.51398800 | -3.45290900 |
| C | 3.40824800 | -3.63162300 | -2.56971500 |
| C | 2.20820100 | 4.68005600  | 1.36601300  |
| C | 1.97124300 | 3.44400400  | 3.90186100  |
| C | 1.86047700 | 2.32481700  | 4.79021600  |
| C | 1.70463300 | -0.43010700 | 5.41669800  |
| C | 1.67312500 | -1.82555700 | 5.09065500  |
| C | 1.71767200 | -4.02858800 | 3.31031500  |
| C | 1.78980000 | -4.64272800 | 2.01639600  |
| C | 1.99905800 | -4.63672100 | -0.80713700 |
| C | 2.31411100 | 4.68796000  | -0.06209700 |
| C | 2.45837000 | 3.46187200  | -2.60556400 |
| C | 2.47988400 | 2.34657400  | -3.50096800 |
| C | 2.41119500 | -0.41090800 | -4.12985600 |
| C | 2.33240800 | -1.80955200 | -3.83775400 |
| C | 2.11654300 | -4.02508000 | -2.09486100 |
| C | 0.92125900 | 4.55529300  | 1.96773300  |
| C | 0.80063600 | 3.93421300  | 3.25085400  |
| C | 0.58215300 | 1.72899600  | 5.00816800  |
| C | 0.50297100 | 0.33568600  | 5.32765800  |
| C | 0.44023000 | -2.41636100 | 4.67732100  |
| C | 0.46319300 | -3.52962400 | 3.77546300  |
| C | 0.60790600 | -4.75009600 | 1.22491400  |
| C | 0.71324900 | -4.75728600 | -0.20257400 |
| C | 1.13141700 | 4.56613500  | -0.85068200 |
| C | 1.20496000 | 3.95754800  | -2.14169400 |

|   |             |             |             |
|---|-------------|-------------|-------------|
| C | 1.24881600  | 1.75403300  | -3.91013500 |
| C | 1.21429400  | 0.35721200  | -4.21569200 |
| C | 1.05454700  | -2.40201400 | -3.61477500 |
| C | 0.94482800  | -3.52542100 | -2.73657300 |
| C | -0.25501900 | 4.75511600  | 1.17700900  |
| C | -0.49307600 | 3.53562600  | 3.71722000  |
| C | -0.60361400 | 2.42364700  | 4.60510600  |
| C | -0.76153400 | -0.33028500 | 5.22964200  |
| C | -0.79182300 | -1.71794900 | 4.89286700  |
| C | -0.74488400 | -3.91814800 | 3.11171800  |
| C | -0.67247200 | -4.53892700 | 1.82936900  |
| C | -0.46348200 | -4.55140500 | -0.99132000 |
| C | -0.14885600 | 4.75516300  | -0.24321600 |
| C | -0.00315300 | 3.56774200  | -2.80369100 |
| C | 0.01900900  | 2.45607400  | -3.69969900 |
| C | -0.04866900 | -0.30749700 | -4.30767700 |
| C | -0.12909300 | -1.69718000 | -3.99910000 |
| C | -0.34582800 | -3.92229600 | -2.26581000 |
| C | -1.54728500 | 4.66216400  | 1.78692200  |
| C | -1.66828600 | 4.04402600  | 3.07509200  |
| C | -1.88876700 | 1.83485800  | 4.83488800  |
| C | -1.96813600 | 0.43767500  | 5.14568800  |
| C | -2.02746900 | -2.31127900 | 4.47783100  |
| C | -2.00383100 | -3.42609100 | 3.58044700  |
| C | -1.86246500 | -4.67011400 | 1.04158200  |
| C | -1.75647900 | -4.67772000 | -0.38861300 |
| C | -1.33531800 | 4.66481900  | -1.03738800 |
| C | -1.26177100 | 4.06753800  | -2.33773100 |
| C | -1.21848800 | 1.86120600  | -4.11072700 |
| C | -1.25230700 | 0.46065300  | -4.41681900 |
| C | -1.41216200 | -2.29726800 | -3.79019900 |
| C | -1.52182900 | -3.41994100 | -2.90949100 |
| C | -2.71839100 | 4.88112800  | 0.99943100  |
| C | -2.95892700 | 3.65382300  | 3.54614500  |
| C | -3.06993900 | 2.53312200  | 4.43599700  |
| C | -3.22564100 | -0.22919200 | 5.03856500  |

|   |             |             |             |
|---|-------------|-------------|-------------|
| C | -3.25545300 | -1.62077000 | 4.70112200  |
| C | -3.21004700 | -3.83269200 | 2.93332000  |
| C | -3.13957200 | -4.46649200 | 1.64853200  |
| C | -2.93042100 | -4.46999300 | -1.17614400 |
| C | -2.61041200 | 4.88309100  | -0.43265800 |
| C | -2.46901800 | 3.67807600  | -2.99557800 |
| C | -2.44728300 | 2.55827700  | -3.89406500 |
| C | -2.51111400 | -0.20721600 | -4.51758900 |
| C | -2.59199800 | -1.60569600 | -4.19966400 |
| C | -2.81025000 | -3.83193500 | -2.45637100 |
| C | -4.01135900 | 4.76872700  | 1.60632000  |
| C | -4.13265600 | 4.14948100  | 2.88989900  |
| C | -4.35329800 | 1.93142600  | 4.64265400  |
| C | -4.43114200 | 0.53698700  | 4.94407500  |
| C | -4.49064600 | -2.21986700 | 4.29422200  |
| C | -4.46846100 | -3.33743900 | 3.40427600  |
| C | -4.32917800 | -4.57870500 | 0.85747600  |
| C | -4.22322000 | -4.57834500 | -0.56851200 |
| C | -3.79886700 | 4.77912800  | -1.22570900 |
| C | -3.72753800 | 4.16841200  | -2.51720100 |
| C | -3.68507000 | 1.95494100  | -4.29132300 |
| C | -3.71733400 | 0.56051200  | -4.60788500 |
| C | -3.87465600 | -2.20610900 | -3.98456700 |
| C | -3.98457300 | -3.32876000 | -3.10507300 |
| C | -5.18833100 | 4.98056800  | 0.81441500  |
| C | -5.42891800 | 3.75046400  | 3.35605600  |
| C | -5.54036300 | 2.62894100  | 4.24235900  |
| C | -5.69461600 | -0.13313400 | 4.85058100  |
| C | -5.72499500 | -1.52866300 | 4.52396400  |
| C | -5.68111200 | -3.74181700 | 2.75488900  |
| C | -5.61046400 | -4.36702100 | 1.46633900  |
| C | -5.40094800 | -4.36230200 | -1.35870600 |
| C | -5.08083500 | 4.98644700  | -0.61590600 |
| C | -4.94050200 | 3.76991100  | -3.17087100 |
| C | -4.91909200 | 2.65074800  | -4.06718600 |
| C | -4.98195300 | -0.11076800 | -4.69982400 |



|   |             |             |             |
|---|-------------|-------------|-------------|
| C | -5.06146200 | -1.50812600 | -4.38581400 |
| C | -5.28031400 | -3.73211200 | -2.64140700 |
| C | -6.47783900 | 4.86558700  | 1.41703700  |
| C | -6.59968200 | 4.24171800  | 2.70333100  |
| C | -6.81890000 | 2.02918900  | 4.45160900  |
| C | -6.89718700 | 0.63062400  | 4.76157300  |
| C | -6.95738700 | -2.12398800 | 4.11863100  |
| C | -6.93508800 | -3.24421200 | 3.22237000  |
| C | -6.79596800 | -4.47117200 | 0.67751200  |
| C | -6.68969300 | -4.46786700 | -0.75334500 |
| C | -6.26659000 | 4.87600500  | -1.40357500 |
| C | -6.19547800 | 4.25868800  | -2.69684000 |
| C | -6.15294800 | 2.05150900  | -4.46383100 |
| C | -6.18488700 | 0.65343500  | -4.78475800 |
| C | -6.34084800 | -2.10317500 | -4.16789400 |
| C | -6.45157000 | -3.22855700 | -3.28441800 |
| C | -7.65400700 | 5.06514600  | 0.62589100  |
| C | -7.89347800 | 3.83260800  | 3.15986100  |
| C | -8.00391300 | 2.71851200  | 4.04007600  |
| C | -8.15820300 | -0.03799400 | 4.65357200  |
| C | -8.18857100 | -1.42488800 | 4.33073100  |
| C | -8.14505800 | -3.63266300 | 2.56339300  |
| C | -8.07480800 | -4.24925700 | 1.28155900  |
| C | -7.86559400 | -4.24208900 | -1.53801600 |
| C | -7.54754500 | 5.07040000  | -0.79420400 |
| C | -7.40725300 | 3.85208600  | -3.34147400 |
| C | -7.38592600 | 2.74036300  | -4.23112500 |
| C | -7.44867100 | -0.01434800 | -4.86595500 |
| C | -7.52719200 | -1.40205300 | -4.55565800 |
| C | -7.74570200 | -3.61848900 | -2.81270600 |
| C | -8.95459400 | 4.96512600  | 1.23050400  |
| C | -9.07642600 | 4.33760700  | 2.51809300  |
| C | -9.29495700 | 2.12703200  | 4.26295300  |
| C | -9.37343500 | 0.72604700  | 4.57565400  |
| C | -9.43413000 | -2.02483600 | 3.93683800  |
| C | -9.41196800 | -3.14690900 | 3.03845600  |

|   |              |             |             |
|---|--------------|-------------|-------------|
| C | -9.27266900  | -4.36781100 | 0.49556100  |
| C | -9.16625900  | -4.36374500 | -0.93796100 |
| C | -8.74390300  | 4.97509600  | -1.58576300 |
| C | -8.67260300  | 4.35510000  | -2.88062900 |
| C | -8.63000800  | 2.15042900  | -4.64460100 |
| C | -8.66193100  | 0.75007200  | -4.96759300 |
| C | -8.81760200  | -2.00250100 | -4.35302500 |
| C | -8.92868600  | -3.12883900 | -3.46668600 |
| C | -10.12510000 | 5.23426300  | 0.45660700  |
| C | -10.36721600 | 3.98433600  | 3.01911500  |
| C | -10.47969600 | 2.84670800  | 3.91651000  |
| C | -10.63607200 | 0.05826400  | 4.53946900  |
| C | -10.66724200 | -1.35723500 | 4.21177300  |
| C | -10.62320900 | -3.59030700 | 2.42368600  |
| C | -10.55157100 | -4.21787600 | 1.11488400  |
| C | -10.33981000 | -4.20948300 | -1.73832800 |
| C | -10.01663800 | 5.23973200  | -0.99255200 |
| C | -9.87461200  | 4.00510400  | -3.56931900 |
| C | -9.85279600  | 2.87033300  | -4.47697000 |
| C | -9.91632100  | 0.08319600  | -5.12087900 |
| C | -9.99637000  | -1.33304700 | -4.80479500 |
| C | -10.21749300 | -3.57441000 | -3.03979000 |
| C | -11.38103400 | 5.17725500  | 1.13541300  |
| C | -11.49820700 | 4.57275900  | 2.37422800  |
| C | -11.72996300 | 2.22699000  | 4.22337600  |
| C | -11.80555500 | 0.87892300  | 4.52474400  |
| C | -11.87006500 | -2.03876200 | 3.85110800  |
| C | -11.84875100 | -3.11842100 | 2.98646800  |
| C | -11.70092600 | -4.41012400 | 0.28820000  |
| C | -11.59849100 | -4.40600800 | -1.09141000 |
| C | -11.15758200 | 5.18857500  | -1.85107400 |
| C | -11.08891200 | 4.59136600  | -3.09701300 |
| C | -11.04386700 | 2.25228800  | -4.96753200 |
| C | -11.07453300 | 0.90471400  | -5.27890600 |
| C | -11.23951700 | -2.01465600 | -4.62798900 |
| C | -11.34647400 | -3.09821700 | -3.77459700 |

|   |              |             |             |
|---|--------------|-------------|-------------|
| H | -12.28674600 | 5.50480500  | 0.62698200  |
| H | -12.49220300 | 4.44445000  | 2.80038800  |
| H | -12.65594600 | 2.78791800  | 4.10498000  |
| H | -12.78852500 | 0.42283100  | 4.63352000  |
| H | -12.83377800 | -1.63717900 | 4.16109100  |
| H | -12.79644500 | -3.53154600 | 2.64394100  |
| H | -12.69238300 | -4.44119600 | 0.73782700  |
| H | -12.51273200 | -4.43415200 | -1.68259900 |
| H | -12.12882900 | 5.51395400  | -1.48099700 |
| H | -12.00836800 | 4.46619900  | -3.66718000 |
| H | -11.97691900 | 2.81370500  | -4.98681300 |
| H | -12.03068300 | 0.44959000  | -5.53340300 |
| H | -12.14698800 | -1.61052500 | -5.07442300 |
| H | -12.33462600 | -3.51142800 | -3.57723600 |
| C | 0.80662900   | -2.04829300 | 8.39977100  |
| H | 0.11157900   | -2.11903100 | 7.56264400  |
| C | -3.71974100  | 1.29787500  | 8.36518800  |
| H | -4.29251800  | 1.41436500  | 7.44384100  |
| H | 1.43305600   | -2.91963700 | 8.59960300  |
| H | -3.30144500  | 2.20286300  | 8.80941900  |

**UP-9-(8,8)**

|   |             |             |             |
|---|-------------|-------------|-------------|
| C | 0.31117500  | 0.31070500  | -7.86246000 |
| C | 2.61653300  | -0.41349700 | -7.77710300 |
| C | 0.71284900  | 1.64610400  | -7.75890100 |
| H | -0.75404900 | 0.07478100  | -7.89463400 |
| C | 3.02129200  | 0.92530700  | -7.67977500 |
| H | 3.35448300  | -1.21326000 | -7.74206000 |
| H | -0.02956300 | 2.43953200  | -7.71637400 |
| H | 4.08343300  | 1.15578800  | -7.57652600 |
| C | -0.55208500 | 8.16575700  | -2.62680100 |
| C | 1.69822700  | 9.24180200  | -2.89850400 |
| C | 0.80354700  | 8.24320200  | -3.22501400 |
| C | 1.05326400  | 7.24494200  | -4.29126300 |
| C | 2.30584100  | 6.65639700  | -4.53912400 |
| C | 0.13116500  | 5.80112700  | -6.04039600 |

|   |             |             |             |
|---|-------------|-------------|-------------|
| C | 2.50531400  | 5.70024000  | -5.54518500 |
| H | 3.14969800  | 6.89187600  | -3.89383300 |
| H | -0.71736400 | 5.38505600  | -6.58018400 |
| H | 3.50043200  | 5.28741000  | -5.69460900 |
| C | 2.07504500  | 1.96480800  | -7.63306300 |
| C | 1.40100000  | 5.24211000  | -6.28006400 |
| C | 2.55251300  | 3.38205800  | -7.35747200 |
| H | 3.21422500  | 3.74547500  | -8.16412800 |
| H | 3.13564300  | 3.36877800  | -6.42503400 |
| O | 1.42833600  | 4.26558900  | -7.24341700 |
| C | -0.05173400 | 6.82724900  | -5.10226500 |
| C | -1.35345500 | 7.49911700  | -4.89720900 |
| C | -2.15229500 | 7.89739400  | -5.94812100 |
| S | -1.76390900 | 7.60737900  | -7.68158300 |
| S | -3.63196600 | 8.90406000  | -5.75929900 |
| C | -2.96575900 | 8.71608500  | -8.33332900 |
| H | -2.98050900 | 8.85676000  | -9.41230600 |
| C | -3.81109800 | 9.30223200  | -7.46424800 |
| H | -4.61217900 | 9.98729300  | -7.73464600 |
| S | 3.28119400  | 9.48471300  | -3.71889400 |
| C | 2.73526700  | 11.56484400 | -2.14616600 |
| H | 2.82507300  | 12.52580000 | -1.64348000 |
| S | 1.36549700  | 10.55145400 | -1.70724700 |
| C | 3.60215700  | 11.08290500 | -3.05682600 |
| H | 4.49854800  | 11.59454000 | -3.40151300 |
| C | -2.10523100 | 8.39107300  | -0.74514200 |
| C | -1.64162100 | 7.82739600  | -3.48565800 |
| C | -2.94033800 | 7.78766400  | -2.93641100 |
| H | -3.77272300 | 7.44512500  | -3.54853100 |
| C | -3.18338400 | 8.09611700  | -1.60097200 |
| H | -4.18587300 | 8.03317000  | -1.18133500 |
| C | -0.79543500 | 8.40346100  | -1.25671500 |
| H | 0.04392000  | 8.55327400  | -0.58282700 |
| O | -2.44337400 | 8.60107700  | 0.56100600  |
| C | 0.87819900  | -8.56455800 | -1.00022900 |
| C | 2.21125300  | -7.61999800 | -3.33616700 |

|   |             |              |             |
|---|-------------|--------------|-------------|
| C | 0.18014700  | -8.41533000  | -2.21250800 |
| H | -0.89542200 | -8.58196600  | -2.20584700 |
| C | 2.25920300  | -8.30278200  | -0.96669000 |
| H | 2.82644400  | -8.40322900  | -0.04438000 |
| C | 2.89172400  | -7.81665100  | -2.11792600 |
| H | 3.92806400  | -7.50452200  | -2.02183500 |
| C | 0.82894200  | -7.98915200  | -3.37979100 |
| C | 0.11619600  | -7.85102100  | -4.66691800 |
| C | 2.81183900  | -6.97258800  | -4.53132300 |
| C | 1.84781500  | -6.17837300  | -5.33930700 |
| C | 0.49200600  | -6.63509400  | -5.41339300 |
| C | 2.18345300  | -4.97094800  | -5.97636900 |
| H | 3.16366500  | -4.52062600  | -5.84047600 |
| C | -0.44086900 | -5.87121800  | -6.13415600 |
| H | -1.48849300 | -6.16839300  | -6.13319600 |
| C | -0.08713500 | -4.69508900  | -6.80489700 |
| H | -0.85055000 | -4.14461000  | -7.34849800 |
| C | 1.23496500  | -4.22976900  | -6.70735300 |
| O | 1.68780400  | -3.03850400  | -7.22118000 |
| C | 1.25043100  | -0.73476700  | -7.83742300 |
| C | 0.72522400  | -2.15599200  | -7.82013300 |
| C | 4.13448800  | -7.13056000  | -4.89880600 |
| C | -0.73275600 | -8.81710200  | -5.15521500 |
| S | 4.88219300  | -6.38613700  | -6.35617800 |
| S | 5.29498800  | -8.20864300  | -4.04537600 |
| S | -1.12019500 | -10.34695500 | -4.29080300 |
| S | -1.47426700 | -8.76771900  | -6.79408800 |
| C | 6.57998600  | -8.10805800  | -5.23976800 |
| H | 7.47310400  | -8.70368400  | -5.06209600 |
| C | 6.39194900  | -7.28350200  | -6.28770200 |
| H | 7.11017100  | -7.11143000  | -7.08681400 |
| C | -2.03188800 | -10.43814700 | -6.79706700 |
| H | -2.49952400 | -10.80652900 | -7.70796200 |
| C | -1.87080600 | -11.15102500 | -5.66580800 |
| H | -2.18911600 | -12.18238000 | -5.52712300 |
| H | 0.48513300  | -2.52190300  | -8.83629800 |

|   |             |             |             |
|---|-------------|-------------|-------------|
| H | -0.20680000 | -2.16094400 | -7.23235300 |
| O | 0.11538000  | -8.92930400 | 0.07237600  |
| C | 0.65447100  | -8.79166800 | 1.40514600  |
| H | 1.25431400  | -7.87078000 | 1.47228000  |
| H | 1.31050300  | -9.65049900 | 1.63351400  |
| C | -0.54364400 | -8.70739600 | 2.34955500  |
| H | -1.10739100 | -9.65312000 | 2.31871500  |
| H | -1.20982900 | -7.92611900 | 1.95482700  |
| C | -0.16575100 | -8.34491200 | 3.79718100  |
| H | 0.40972100  | -9.15973500 | 4.26791600  |
| H | 0.49425300  | -7.46344700 | 3.77945000  |
| C | -1.41619000 | -8.00759200 | 4.63486400  |
| H | -1.96734300 | -8.93044200 | 4.88362100  |
| H | -2.09345300 | -7.40510000 | 4.00810200  |
| C | -1.12063000 | -7.19626800 | 5.90924800  |
| H | -0.55589400 | -7.80284100 | 6.63752400  |
| H | -0.46667200 | -6.35375900 | 5.63296600  |
| C | -2.40387700 | -6.63107300 | 6.55136600  |
| H | -2.95122500 | -7.42879200 | 7.08199200  |
| H | -3.06990700 | -6.28701900 | 5.74338100  |
| C | -2.15639900 | -5.43915500 | 7.49296100  |
| H | -1.60142800 | -5.76329200 | 8.39018900  |
| H | -1.50941100 | -4.71411800 | 6.97337100  |
| C | -1.41501400 | 8.65130800  | 1.57158800  |
| H | -0.66294400 | 7.87107800  | 1.37788100  |
| H | -0.91008100 | 9.63319500  | 1.54410400  |
| C | -2.11256900 | 8.37884800  | 2.90431800  |
| H | -2.77900300 | 9.21786100  | 3.15861900  |
| H | -2.75448100 | 7.49915000  | 2.74867200  |
| C | -1.14320200 | 8.07600100  | 4.06272400  |
| H | -0.61516000 | 8.98919100  | 4.38470700  |
| H | -0.37153600 | 7.37478800  | 3.70743300  |
| C | -1.88410300 | 7.42509400  | 5.24696900  |
| H | -2.54426000 | 8.16323200  | 5.73358200  |
| H | -2.54632500 | 6.64565900  | 4.83706600  |
| C | -0.96821000 | 6.75679700  | 6.28908400  |

|   |             |             |             |
|---|-------------|-------------|-------------|
| H | -0.41931100 | 7.51450600  | 6.87370100  |
| H | -0.20810800 | 6.16400300  | 5.75551600  |
| C | -1.75596800 | 5.81681300  | 7.22378400  |
| H | -2.37525900 | 6.40524900  | 7.92245900  |
| H | -2.45906200 | 5.23277200  | 6.60792600  |
| C | -0.87519400 | 4.82512000  | 8.00252900  |
| H | -0.26129500 | 5.35711200  | 8.74990400  |
| H | -0.16976100 | 4.35407100  | 7.30008800  |
| C | -1.69713500 | 3.71909400  | 8.68568500  |
| H | -2.35161400 | 3.24709500  | 7.93631800  |
| H | -2.36100500 | 4.15835300  | 9.45043100  |
| C | -3.46035700 | -4.73048700 | 7.89878500  |
| H | -4.04452500 | -4.52512100 | 6.98889700  |
| H | -4.08045200 | -5.39856300 | 8.51948400  |
| C | -3.21774000 | -3.40538100 | 8.63876200  |
| H | -2.49595500 | -2.80089700 | 8.06266300  |
| H | -2.71397900 | -3.60420200 | 9.60342900  |
| C | -4.44360000 | -2.55705700 | 8.88769600  |
| C | -1.62613000 | 1.49892600  | 9.91539400  |
| H | -2.37986000 | 1.78748500  | 10.65733600 |
| C | -0.81433300 | 2.62741300  | 9.33116600  |
| H | -0.20152900 | 3.09757800  | 10.12258900 |
| H | -0.11461900 | 2.23063600  | 8.57885100  |
| H | 12.09930600 | 4.62607100  | -2.47635300 |
| H | 11.90961400 | 5.89233300  | -0.41861900 |
| H | 11.75485400 | 6.21959400  | 1.64567800  |
| H | 11.61661300 | 5.63991700  | 3.99495600  |
| H | 11.55096200 | 4.39365200  | 5.67761300  |
| H | 11.54805900 | 2.31834300  | 6.92914600  |
| H | 11.60865100 | 0.24824800  | 7.24458700  |
| H | 11.73799900 | -2.10444100 | 6.67785500  |
| H | 12.24841300 | 2.93377000  | -3.69977400 |
| H | 12.37723400 | 0.58190700  | -4.26847400 |
| H | 12.43474200 | -1.48690800 | -3.95362000 |
| H | 12.42773500 | -3.56351900 | -2.70500600 |
| H | 12.35911700 | -4.81146200 | -1.02432900 |

|   |             |             |             |
|---|-------------|-------------|-------------|
| H | 12.22214100 | -5.38536000 | 1.32634700  |
| H | 12.07166200 | -5.05664700 | 3.38983700  |
| H | 11.88528600 | -3.79575500 | 5.45111500  |
| C | 11.10731900 | 4.79946400  | -2.06206700 |
| C | 10.99905000 | 5.52255900  | -0.88754800 |
| C | 10.77831500 | 5.98638900  | 2.06725900  |
| C | 10.69943400 | 5.65539600  | 3.40823200  |
| C | 10.60523500 | 3.87258200  | 5.81825500  |
| C | 10.60362800 | 2.68776200  | 6.53257500  |
| C | 10.68932400 | -0.27624700 | 6.98875700  |
| C | 10.76318100 | -1.61939900 | 6.66526900  |
| C | 11.32071700 | 2.37569300  | -3.81651800 |
| C | 11.39423800 | 1.03278300  | -4.14128400 |
| C | 11.47639800 | -1.93164100 | -3.68994200 |
| C | 11.47236800 | -3.11756300 | -2.97735600 |
| C | 11.37478800 | -4.89846100 | -0.56678600 |
| C | 11.29668900 | -5.22578300 | 0.77516800  |
| C | 11.08070400 | -4.76045700 | 3.73043400  |
| C | 10.97434200 | -4.04056300 | 4.90709900  |
| C | 9.97047600  | 4.17109200  | -2.65422200 |
| C | 9.74595700  | 5.66956100  | -0.21961900 |
| C | 9.63905500  | 5.89362300  | 1.21203800  |
| C | 9.47568800  | 5.20682700  | 3.99070900  |
| C | 9.43014100  | 4.34277700  | 5.15795200  |
| C | 9.42662300  | 1.88710300  | 6.63903500  |
| C | 9.46804100  | 0.45173000  | 6.86117600  |
| C | 9.62115500  | -2.33249300 | 6.19080200  |
| C | 10.07393200 | 2.99661100  | -3.50381000 |
| C | 10.22657900 | 0.21242100  | -4.17765500 |
| C | 10.26635500 | -1.22387500 | -3.95965600 |
| C | 10.25805400 | -3.68179000 | -2.48222200 |
| C | 10.21069600 | -4.54374300 | -1.31320500 |
| C | 10.04857100 | -5.22182800 | 1.46808200  |
| C | 9.94400000  | -4.99729100 | 2.89993500  |
| C | 9.72343100  | -3.50527100 | 5.33900200  |
| C | 8.68355500  | 4.56381000  | -2.17200200 |



|   |            |             |             |
|---|------------|-------------|-------------|
| C | 8.57097300 | 5.31513400  | -0.95195400 |
| C | 8.36285800 | 5.75026500  | 1.83918900  |
| C | 8.28099900 | 5.40495300  | 3.23167500  |
| C | 8.19214100 | 3.72021900  | 5.50755400  |
| C | 8.19050300 | 2.48989300  | 6.25007500  |
| C | 8.27089000 | -0.30888100 | 6.68532700  |
| C | 8.34747900 | -1.70406800 | 6.34989300  |
| C | 8.88514100 | 2.27285700  | -3.82908600 |
| C | 8.96153600 | 0.87770800  | -4.16743200 |
| C | 9.03922800 | -1.92391700 | -3.74273500 |
| C | 9.03492100 | -3.15614000 | -3.00222800 |
| C | 8.94265100 | -4.83428500 | -0.72119200 |
| C | 8.86159900 | -5.17335200 | 0.67336700  |
| C | 8.65756000 | -4.73773900 | 3.46600500  |
| C | 8.54693200 | -3.99034400 | 4.68846100  |
| C | 7.49495700 | 4.01995600  | -2.76962100 |
| C | 7.27320100 | 5.50219400  | -0.36277600 |
| C | 7.16842100 | 5.72044400  | 1.04039200  |
| C | 7.00701700 | 5.03680600  | 3.78610700  |
| C | 6.96260400 | 4.18958400  | 4.92958400  |
| C | 6.95909400 | 1.76350800  | 6.39634900  |
| C | 6.99937200 | 0.35739600  | 6.61622600  |
| C | 7.15042000 | -2.39476700 | 5.95502400  |
| C | 7.59665800 | 2.86819900  | -3.60176900 |
| C | 7.74771200 | 0.11474700  | -4.27071000 |
| C | 7.78670400 | -1.29343300 | -4.05844800 |
| C | 7.77827200 | -3.72314500 | -2.59532800 |
| C | 7.73170200 | -4.56542100 | -1.44737000 |
| C | 7.57156800 | -5.23481900 | 1.30426000  |
| C | 7.46888800 | -5.01699400 | 2.70795200  |
| C | 7.25064300 | -3.54365400 | 5.12005800  |
| C | 6.20587100 | 4.46787600  | -2.33722300 |
| C | 6.09319300 | 5.21936400  | -1.12136200 |
| C | 5.88496000 | 5.65170200  | 1.67036400  |
| C | 5.80340900 | 5.30348700  | 3.05864000  |
| C | 5.71490700 | 3.61739400  | 5.33447100  |

|   |            |             |             |
|---|------------|-------------|-------------|
| C | 5.71329100 | 2.39133500  | 6.07722100  |
| C | 5.79332800 | -0.40666600 | 6.51651800  |
| C | 5.86942400 | -1.79844200 | 6.18240900  |
| C | 6.40780500 | 2.17506300  | -3.99437400 |
| C | 6.48383400 | 0.78362200  | -4.33391100 |
| C | 6.56194700 | -2.01963700 | -3.91234600 |
| C | 6.55766500 | -3.24793500 | -3.17171000 |
| C | 6.46468600 | -4.92032900 | -0.88439300 |
| C | 6.38374300 | -5.25967400 | 0.50650600  |
| C | 6.17960200 | -4.82886300 | 3.30067800  |
| C | 6.06872800 | -4.08398900 | 4.52037600  |
| C | 5.02807700 | 3.93577600  | -2.94310700 |
| C | 4.80598100 | 5.42749400  | -0.53893500 |
| C | 4.70030800 | 5.64548500  | 0.87319500  |
| C | 4.53876400 | 4.95320600  | 3.62159000  |
| C | 4.49438000 | 4.10033600  | 4.77236800  |
| C | 4.49105100 | 1.67334200  | 6.24678900  |
| C | 4.53118900 | 0.25878500  | 6.47036000  |
| C | 4.68176700 | -2.49708200 | 5.80761400  |
| C | 5.13133900 | 2.77801600  | -3.78113200 |
| C | 5.28174200 | 0.02214900  | -4.45240500 |
| C | 5.32168900 | -1.39500200 | -4.24358400 |
| C | 5.31318500 | -3.82194500 | -2.77298800 |
| C | 5.26555000 | -4.66270500 | -1.61450900 |
| C | 5.10564400 | -5.34111900 | 1.13804500  |
| C | 5.00176500 | -5.12583600 | 2.55069800  |
| C | 4.78253700 | -3.65265500 | 4.96676900  |
| C | 3.73719700 | 4.37023100  | -2.49736600 |
| C | 3.62467200 | 5.13201800  | -1.29530900 |
| C | 3.41498200 | 5.56315900  | 1.50398700  |
| C | 3.33434200 | 5.21211900  | 2.88745500  |
| C | 3.24638900 | 3.52023800  | 5.17396700  |
| C | 3.24456400 | 2.30006100  | 5.91832300  |
| C | 3.32402400 | -0.50756700 | 6.36426500  |
| C | 3.39942200 | -1.89498000 | 6.02932900  |
| C | 3.94046000 | 2.07578500  | -4.15657300 |

|   |            |             |             |
|---|------------|-------------|-------------|
| C | 4.01557000 | 0.69134500  | -4.49283700 |
| C | 4.09377000 | -2.11491900 | -4.07759600 |
| C | 4.08992800 | -3.33515200 | -3.33695600 |
| C | 3.99675200 | -4.99799700 | -1.04094700 |
| C | 3.91609300 | -5.34925900 | 0.33955000  |
| C | 3.71006100 | -4.92724700 | 3.14100700  |
| C | 3.59907500 | -4.18642700 | 4.35785000  |
| C | 2.55801300 | 3.82992200  | -3.09902400 |
| C | 2.33273600 | 5.33715000  | -0.71265600 |
| C | 2.22783300 | 5.55078100  | 0.70117300  |
| C | 2.06750200 | 4.85304600  | 3.45161200  |
| C | 2.02333700 | 4.00073000  | 4.60434200  |
| C | 2.01960600 | 1.57773000  | 6.08984300  |
| C | 2.05893200 | 0.16225400  | 6.31696700  |
| C | 2.20845000 | -2.59467800 | 5.64832400  |
| C | 2.66056700 | 2.67777700  | -3.93660200 |
| C | 2.80895000 | -0.06940300 | -4.59499700 |
| C | 2.84890300 | -1.48181800 | -4.38935400 |
| C | 2.84241300 | -3.89935400 | -2.92363100 |
| C | 2.79481800 | -4.73544600 | -1.76934000 |
| C | 2.63388500 | -5.42867500 | 0.97015400  |
| C | 2.52960400 | -5.21813900 | 2.38300800  |
| C | 2.30926500 | -3.74893000 | 4.80290600  |
| C | 1.27218900 | 4.28034000  | -2.67787600 |
| C | 1.15807000 | 5.03370100  | -1.46776700 |
| C | 0.94829800 | 5.45163800  | 1.32849200  |
| C | 0.86841300 | 5.09743900  | 2.71465000  |
| C | 0.78156000 | 3.41637000  | 4.99912300  |
| C | 0.77854600 | 2.19886000  | 5.75317000  |
| C | 0.85565700 | -0.60066500 | 6.20460200  |
| C | 0.93120000 | -1.99120900 | 5.86481600  |
| C | 1.47518600 | 1.98800600  | -4.32867200 |
| C | 1.55033800 | 0.59792400  | -4.64657800 |
| C | 1.62650400 | -2.19410600 | -4.21719000 |
| C | 1.62268800 | -3.41815700 | -3.48479500 |
| C | 1.53215800 | -5.09113800 | -1.21168700 |

|   |             |             |             |
|---|-------------|-------------|-------------|
| C | 1.45038800  | -5.43714600 | 0.17082800  |
| C | 1.24167800  | -5.01273100 | 2.96531400  |
| C | 1.13078800  | -4.27243300 | 4.18649300  |
| C | 0.09594100  | 3.75712800  | -3.30230100 |
| C | -0.13368100 | 5.21849600  | -0.88242100 |
| C | -0.23794000 | 5.41875000  | 0.52601400  |
| C | -0.39705500 | 4.72657100  | 3.27234600  |
| C | -0.44158300 | 3.88606600  | 4.42341100  |
| C | -0.44776600 | 1.47901900  | 5.92108100  |
| C | -0.40900600 | 0.06971300  | 6.14484400  |
| C | -0.25966000 | -2.68112000 | 5.46689400  |
| C | 0.19776100  | 2.60023200  | -4.13224100 |
| C | 0.34631700  | -0.16194600 | -4.76032800 |
| C | 0.38478900  | -1.56981300 | -4.54560800 |
| C | 0.37826100  | -4.00433100 | -3.09629700 |
| C | 0.33328700  | -4.85359800 | -1.95206800 |
| C | 0.16723000  | -5.52007600 | 0.79715100  |
| C | 0.06262600  | -5.29640900 | 2.20238800  |
| C | -0.15899600 | -3.82581300 | 4.61914400  |
| C | -1.19556700 | 4.19836200  | -2.86971000 |
| C | -1.31044000 | 4.92606900  | -1.64282700 |
| C | -1.51929600 | 5.32601600  | 1.15592100  |
| C | -1.59937500 | 4.98101200  | 2.54097900  |
| C | -1.68839100 | 3.31792400  | 4.83442600  |
| C | -1.69256500 | 2.10489800  | 5.59282700  |
| C | -1.61658200 | -0.69193900 | 6.03338200  |
| C | -1.54010100 | -2.07706900 | 5.68129900  |
| C | -0.99006600 | 1.90380800  | -4.52584500 |
| C | -0.91541900 | 0.50800500  | -4.83644700 |
| C | -0.83823000 | -2.29880900 | -4.40401900 |
| C | -0.84158900 | -3.52893500 | -3.67178900 |
| C | -0.93322300 | -5.22181900 | -1.39681800 |
| C | -1.01678100 | -5.55496800 | -0.00653000 |
| C | -1.22736400 | -5.09906600 | 2.78679600  |
| C | -1.33894500 | -4.35224600 | 4.00195100  |
| C | -2.37042200 | 3.66973200  | -3.48655600 |

|   |             |             |             |
|---|-------------|-------------|-------------|
| C | -2.59607700 | 5.10452600  | -1.05112100 |
| C | -2.70187000 | 5.31263900  | 0.35974800  |
| C | -2.86259800 | 4.63714900  | 3.10895600  |
| C | -2.90827000 | 3.79828100  | 4.26877300  |
| C | -2.91710100 | 1.39078500  | 5.76841000  |
| C | -2.87815100 | -0.02421700 | 5.98930700  |
| C | -2.72649400 | -2.76584400 | 5.28539500  |
| C | -2.26776200 | 2.51062600  | -4.32545800 |
| C | -2.11524100 | -0.25602800 | -4.96359100 |
| C | -2.07674600 | -1.67446400 | -4.74415200 |
| C | -2.08443800 | -4.11460800 | -3.28479500 |
| C | -2.13094000 | -4.97089400 | -2.13427000 |
| C | -2.29639100 | -5.63433200 | 0.62174500  |
| C | -2.40217400 | -5.40015000 | 2.03216300  |
| C | -2.62406700 | -3.91536300 | 4.43991300  |
| C | -3.66164900 | 4.09448900  | -3.03507700 |
| C | -3.77436100 | 4.81305000  | -1.80790600 |
| C | -3.98253600 | 5.23833400  | 0.99260200  |
| C | -4.06443100 | 4.89871000  | 2.37757200  |
| C | -4.15645800 | 3.23169600  | 4.68044100  |
| C | -4.16069500 | 2.01790100  | 5.43489800  |
| C | -4.08241000 | -0.78755900 | 5.86596100  |
| C | -4.00516800 | -2.16616400 | 5.50740100  |
| C | -3.45608400 | 1.80490900  | -4.70415900 |
| C | -3.37953500 | 0.41394200  | -5.02715300 |
| C | -3.30188100 | -2.39930700 | -4.58794500 |
| C | -3.30564100 | -3.62639700 | -3.85248000 |
| C | -3.39999600 | -5.31719600 | -1.56706400 |
| C | -3.48323900 | -5.65227600 | -0.17973400 |
| C | -3.69194400 | -5.19940800 | 2.61938400  |
| C | -3.80286200 | -4.45042400 | 3.83043000  |
| C | -4.84329100 | 3.56101500  | -3.64744800 |
| C | -5.06504100 | 5.01245600  | -1.21967200 |
| C | -5.17077000 | 5.22786800  | 0.19289700  |
| C | -5.33328000 | 4.55296700  | 2.94737100  |
| C | -5.37970800 | 3.71255500  | 4.10698600  |

|   |             |             |             |
|---|-------------|-------------|-------------|
| C | -5.38862500 | 1.29605100  | 5.59824600  |
| C | -5.34863200 | -0.11893600 | 5.81712800  |
| C | -5.19397400 | -2.86330400 | 5.11966400  |
| C | -4.73989300 | 2.40645000  | -4.48916000 |
| C | -4.58601000 | -0.35345500 | -5.14025800 |
| C | -4.54695700 | -1.76914600 | -4.91796400 |
| C | -4.55623400 | -4.20265100 | -3.45266000 |
| C | -4.60382200 | -5.05364000 | -2.30041900 |
| C | -4.76777000 | -5.72282900 | 0.45324000  |
| C | -4.87292200 | -5.49711900 | 1.86414200  |
| C | -5.09272600 | -4.01520800 | 4.27619600  |
| C | -6.12972100 | 3.98753600  | -3.19899200 |
| C | -6.24193300 | 4.72325300  | -1.97352500 |
| C | -6.44949000 | 5.14396000  | 0.82221100  |
| C | -6.53163200 | 4.80298600  | 2.21275400  |
| C | -6.62434500 | 3.13778200  | 4.50556800  |
| C | -6.62853900 | 1.91708400  | 5.25796100  |
| C | -6.54882200 | -0.88102300 | 5.69359200  |
| C | -6.47088300 | -2.26873400 | 5.34414600  |
| C | -5.92574700 | 1.70526700  | -4.86412200 |
| C | -5.84812300 | 0.31223100  | -5.19483000 |
| C | -5.77063600 | -2.48675200 | -4.75475100 |
| C | -5.77534300 | -3.71425900 | -4.01351000 |
| C | -5.86979800 | -5.39320500 | -1.73352200 |
| C | -5.95274800 | -5.73166600 | -0.34287800 |
| C | -6.15914300 | -5.29167400 | 2.44894800  |
| C | -6.27018900 | -4.54637200 | 3.66840000  |
| C | -7.31008400 | 3.44780200  | -3.80142800 |
| C | -7.53196000 | 4.90802900  | -1.38160800 |
| C | -7.63632400 | 5.11904500  | 0.02314200  |
| C | -7.79866500 | 4.44472800  | 2.77336900  |
| C | -7.84519800 | 3.60780200  | 3.92484900  |
| C | -7.85323300 | 1.19232700  | 5.40928000  |
| C | -7.81307900 | -0.21404600 | 5.62975700  |
| C | -7.65899700 | -2.96179900 | 4.95060800  |
| C | -7.20750700 | 2.30092400  | -4.63901500 |

|   |              |             |             |
|---|--------------|-------------|-------------|
| C | -7.05405000  | -0.45158600 | -5.29857900 |
| C | -7.01509300  | -1.85775000 | -5.07738700 |
| C | -7.02492700  | -4.28170600 | -3.60754400 |
| C | -7.07255600  | -5.12457000 | -2.46089000 |
| C | -7.23579500  | -5.79423000 | 0.28841000  |
| C | -7.33965800  | -5.57500900 | 1.69166800  |
| C | -7.55847100  | -4.10568500 | 4.10774100  |
| C | -8.60711600  | 3.89081600  | -3.36881500 |
| C | -8.71967700  | 4.63169200  | -2.14248000 |
| C | -8.92701600  | 5.05325800  | 0.65231900  |
| C | -9.00932300  | 4.71154000  | 2.04593600  |
| C | -9.10196800  | 3.04409900  | 4.33577300  |
| C | -9.10594000  | 1.81940500  | 5.08780200  |
| C | -9.02626000  | -0.97805100 | 5.52808100  |
| C | -8.94827200  | -2.37174600 | 5.18587600  |
| C | -8.40336600  | 1.61003100  | -5.03662400 |
| C | -8.32545000  | 0.21504600  | -5.37268900 |
| C | -8.24785400  | -2.58281400 | -4.93355900 |
| C | -8.25297800  | -3.81069600 | -4.18709000 |
| C | -8.34769300  | -5.48455700 | -1.90365200 |
| C | -8.43059000  | -5.82386900 | -0.50970500 |
| C | -8.63642400  | -5.39041500 | 2.28328600  |
| C | -8.74736600  | -4.64764900 | 3.50874100  |
| C | -9.78225300  | 3.40710900  | -4.02261000 |
| C | -10.00701800 | 4.88623600  | -1.57627200 |
| C | -10.11327700 | 5.10300800  | -0.14320800 |
| C | -10.27745100 | 4.42118800  | 2.63774000  |
| C | -10.32498900 | 3.56538100  | 3.81130600  |
| C | -10.33264300 | 1.12081100  | 5.31059000  |
| C | -10.29171100 | -0.31397800 | 5.53767600  |
| C | -10.13654600 | -3.09503800 | 4.85801400  |
| C | -9.67761600  | 2.23774200  | -4.87899500 |
| C | -9.52235600  | -0.54503300 | -5.55210300 |
| C | -9.48246500  | -1.98003100 | -5.32721000 |
| C | -9.49282000  | -4.42877900 | -3.83570200 |
| C | -9.54174400  | -5.28592600 | -2.66333400 |

|   |              |             |             |
|---|--------------|-------------|-------------|
| C | -9.70686500  | -5.96311500 | 0.11844200  |
| C | -9.81232300  | -5.74207500 | 1.55093300  |
| C | -10.03366300 | -4.26186100 | 3.99775400  |
| C | -11.03423800 | 3.93850100  | -3.58922100 |
| C | -11.14266500 | 4.65224200  | -2.40891800 |
| C | -11.36194900 | 5.10242100  | 0.54847200  |
| C | -11.44119400 | 4.77356800  | 1.89005000  |
| C | -11.53915600 | 3.00486700  | 4.31073000  |
| C | -11.54291100 | 1.82535600  | 5.03394600  |
| C | -11.45856300 | -1.13559400 | 5.50449800  |
| C | -11.38359000 | -2.47772900 | 5.17696600  |
| C | -10.81819100 | 1.52578200  | -5.35833600 |
| C | -10.74314800 | 0.18312000  | -5.68362200 |
| C | -10.66073200 | -2.77876800 | -5.22056000 |
| C | -10.66582700 | -3.96013400 | -4.50050200 |
| C | -10.76701800 | -5.72637700 | -2.07817000 |
| C | -10.84676200 | -6.05303800 | -0.73603300 |
| C | -11.06421100 | -5.59976500 | 2.22179900  |
| C | -11.17097000 | -4.88618300 | 3.40240700  |
| H | -11.94444200 | 3.69475500  | -4.13498600 |
| H | -12.13436100 | 4.94516700  | -2.06767400 |
| H | -12.28712100 | 5.26130300  | -0.00333700 |
| H | -12.42583700 | 4.68529000  | 2.34654000  |
| H | -12.49454700 | 3.44842000  | 4.03476500  |
| H | -12.50102700 | 1.38223800  | 5.30108000  |
| H | -12.44175200 | -0.68604700 | 5.63484700  |
| H | -12.31053500 | -3.03728700 | 5.06143900  |
| H | -11.79298200 | 2.01089000  | -5.37304100 |
| H | -11.66161500 | -0.34115600 | -5.94299100 |
| H | -11.60377900 | -2.40963400 | -5.62068600 |
| H | -11.61264000 | -4.47910300 | -4.35924500 |
| H | -11.68460100 | -5.70840300 | -2.66420700 |
| H | -11.82416900 | -6.28084500 | -0.31357600 |
| H | -11.97533500 | -5.96729700 | 1.75221600  |
| H | -12.16232300 | -4.71730400 | 3.82001200  |
| H | -4.24606500  | -1.58228300 | 9.34644000  |



|   |             |             |             |
|---|-------------|-------------|-------------|
| C | -1.50350600 | 0.20686500  | 9.57620900  |
| H | -0.76830500 | -0.11511700 | 8.83625600  |
| C | -5.70948500 | -2.87949700 | 8.58241400  |
| H | -5.96224300 | -3.82937200 | 8.10969600  |
| H | -6.53329300 | -2.19349700 | 8.78362300  |
| H | -2.12612100 | -0.56796100 | 10.02725600 |

**UP-9-(9,9)**

|   |             |             |             |
|---|-------------|-------------|-------------|
| C | -1.04136700 | 0.38902500  | -8.42675500 |
| C | -3.10565100 | 1.63860700  | -8.25529700 |
| C | -1.75494700 | -0.81354000 | -8.42475400 |
| H | 0.04955600  | 0.36346300  | -8.45491700 |
| C | -3.82163400 | 0.43399900  | -8.25328100 |
| H | -3.62912600 | 2.58678100  | -8.14883600 |
| H | -1.22594500 | -1.76332600 | -8.45311800 |
| H | -4.90791200 | 0.45812200  | -8.14753400 |
| C | -3.05732500 | -7.93456400 | -3.73552200 |
| C | -5.40497300 | -8.34484900 | -4.52042300 |
| C | -4.24777200 | -7.59440800 | -4.55225500 |
| C | -4.03493400 | -6.46250300 | -5.48297400 |
| C | -5.03355000 | -5.53619900 | -5.83259700 |
| C | -2.46934200 | -5.15067300 | -6.83117800 |
| C | -4.79436400 | -4.45966300 | -6.69794100 |
| H | -6.01748400 | -5.60524800 | -5.37337300 |
| H | -1.45743100 | -4.91941000 | -7.15742400 |
| H | -5.60558300 | -3.77292100 | -6.92769700 |
| C | -3.15529400 | -0.80201200 | -8.30531500 |
| C | -3.49076300 | -4.24441600 | -7.17105400 |
| C | -3.96755700 | -2.07528500 | -8.15139300 |
| H | -4.58804100 | -2.27428700 | -9.04481100 |
| H | -4.64487500 | -1.94743100 | -7.29325200 |
| O | -3.08386500 | -3.18224000 | -7.93498200 |
| C | -2.72594000 | -6.27666600 | -6.03702600 |
| C | -1.68757900 | -7.28112800 | -5.71832300 |
| C | -0.80258200 | -7.75811000 | -6.66205500 |
| S | -0.74442300 | -7.20057200 | -8.37210800 |

|   |             |              |              |
|---|-------------|--------------|--------------|
| S | 0.33472400  | -9.12143500  | -6.36946300  |
| C | 0.28593100  | -8.50053900  | -8.96095100  |
| H | 0.49565300  | -8.52546800  | -10.02845700 |
| C | 0.77487800  | -9.36887700  | -8.05511400  |
| H | 1.43967500  | -10.20054500 | -8.27985100  |
| S | -6.81451900 | -8.07183600  | -5.60494400  |
| C | -7.10102600 | -10.37115200 | -4.28978300  |
| H | -7.51626800 | -11.31965000 | -3.95490000  |
| S | -5.63526600 | -9.80859900  | -3.49560800  |
| C | -7.63478200 | -9.58615200  | -5.24481600  |
| H | -8.54604900 | -9.80367700  | -5.79832800  |
| C | -2.00915300 | -8.69913600  | -1.65821400  |
| C | -1.77216300 | -7.81035100  | -4.34130800  |
| C | -0.63589600 | -8.14209000  | -3.57250400  |
| H | 0.35790100  | -7.97141900  | -3.98203700  |
| C | -0.74189900 | -8.60932600  | -2.26598800  |
| H | 0.14320100  | -8.83679700  | -1.67525800  |
| C | -3.15614000 | -8.34577800  | -2.38943300  |
| H | -4.12523900 | -8.33045700  | -1.89955900  |
| O | -2.00154000 | -9.07565600  | -0.34525000  |
| C | -0.23841200 | 9.17595900   | -1.19804600  |
| C | -1.49172600 | 8.46572000   | -3.64875900  |
| C | 0.53432400  | 8.86252800   | -2.33099800  |
| H | 1.61474900  | 8.81417100   | -2.21045300  |
| C | -1.64152700 | 9.16293800   | -1.29311300  |
| H | -2.26461100 | 9.37311500   | -0.42756100  |
| C | -2.24102500 | 8.78201200   | -2.49980600  |
| H | -3.32166400 | 8.65891100   | -2.51105700  |
| C | -0.06546700 | 8.54738900   | -3.55827100  |
| C | 0.72648200  | 8.24246500   | -4.77014800  |
| C | -2.09093100 | 7.98265800   | -4.91495200  |
| C | -1.25584400 | 6.99102500   | -5.63642100  |
| C | 0.16800700  | 7.13951000   | -5.57845200  |
| C | -1.79536500 | 5.89501800   | -6.32720700  |
| H | -2.86076900 | 5.67949400   | -6.28716700  |
| C | 0.96731300  | 6.19869100   | -6.24966200  |

|   |             |             |             |
|---|-------------|-------------|-------------|
| H | 2.05036600  | 6.24870000  | -6.15214800 |
| C | 0.42092300  | 5.14247500  | -6.98883100 |
| H | 1.08701100  | 4.44165600  | -7.48542400 |
| C | -0.97359300 | 4.97628800  | -7.00749300 |
| O | -1.63487500 | 3.92937100  | -7.59758600 |
| C | -1.70263300 | 1.62417900  | -8.31063400 |
| C | -0.85832700 | 2.87579100  | -8.18440900 |
| C | -3.27483300 | 8.47022900  | -5.42923200 |
| C | 1.81552800  | 8.99334300  | -5.15456900 |
| S | -3.98472400 | 7.96090200  | -7.00232800 |
| S | -4.22712200 | 9.79682200  | -4.67390400 |
| S | 2.44036800  | 10.40743700 | -4.23442800 |
| S | 2.69354200  | 8.76910700  | -6.70880800 |
| C | -5.29238800 | 10.07703600 | -6.04540100 |
| H | -6.00378000 | 10.89651300 | -5.96495500 |
| C | -5.18182400 | 9.24644500  | -7.09965100 |
| H | -5.79027700 | 9.29350900  | -8.00059400 |
| C | 3.60752300  | 10.27158400 | -6.62901000 |
| H | 4.23893200  | 10.51731500 | -7.48049000 |
| C | 3.49175600  | 11.01194200 | -5.50997200 |
| H | 4.01616600  | 11.94677500 | -5.32208000 |
| H | -0.46945000 | 3.21413600  | -9.16343600 |
| H | 0.00635000  | 2.64001400  | -7.54334200 |
| O | 0.47082400  | 9.42579600  | -0.05710900 |
| C | -0.24263200 | 9.48187400  | 1.19525900  |
| H | -0.95009200 | 8.63998700  | 1.25273300  |
| H | -0.82104900 | 10.42125000 | 1.25582400  |
| C | 0.79067000  | 9.36796200  | 2.31370000  |
| H | 1.44619900  | 10.25270000 | 2.31468400  |
| H | 1.42372900  | 8.49867400  | 2.08343400  |
| C | 0.13878900  | 9.15936000  | 3.69458400  |
| H | -0.33013100 | 10.09300300 | 4.04815400  |
| H | -0.67279700 | 8.42139000  | 3.59352200  |
| C | 1.14163700  | 8.62748400  | 4.73674100  |
| H | 1.86566300  | 9.41414100  | 5.00895300  |
| H | 1.72504700  | 7.82101900  | 4.26470500  |

|   |             |              |            |
|---|-------------|--------------|------------|
| C | 0.47104000  | 8.05447300   | 5.99908900 |
| H | 0.03878200  | 8.86476100   | 6.61086100 |
| H | -0.37207600 | 7.41749700   | 5.68566900 |
| C | 1.43356100  | 7.19894400   | 6.84186500 |
| H | 2.21212600  | 7.83536200   | 7.29695600 |
| H | 1.95920000  | 6.50475100   | 6.16652200 |
| C | 0.72775500  | 6.36762000   | 7.92574200 |
| H | 0.26940300  | 7.02865600   | 8.68164200 |
| H | -0.10028600 | 5.81368000   | 7.45489700 |
| C | -3.24125100 | -9.08538000  | 0.39056500 |
| H | -3.77733500 | -8.13724900  | 0.22878100 |
| H | -3.88339400 | -9.90908300  | 0.03049200 |
| C | -2.88095600 | -9.22100100  | 1.86840900 |
| H | -2.42886600 | -10.20648600 | 2.05933600 |
| H | -2.10856700 | -8.46688800  | 2.07830700 |
| C | -4.08675000 | -8.97193200  | 2.79500600 |
| H | -4.74673500 | -9.85514000  | 2.82326300 |
| H | -4.68867400 | -8.14559800  | 2.38356200 |
| C | -3.65379700 | -8.57599800  | 4.21810700 |
| H | -3.14139100 | -9.41932500  | 4.71187600 |
| H | -2.90918600 | -7.76813000  | 4.13365900 |
| C | -4.81847500 | -8.07272600  | 5.08793900 |
| H | -5.48576900 | -8.90930500  | 5.35796100 |
| H | -5.42520600 | -7.37413400  | 4.48998300 |
| C | -4.34713200 | -7.34125800  | 6.35623000 |
| H | -3.81328900 | -8.04179800  | 7.02170500 |
| H | -3.61292100 | -6.57263600  | 6.06508700 |
| C | -5.49293300 | -6.66124700  | 7.12277700 |
| H | -6.19350700 | -7.42343500  | 7.50688000 |
| H | -6.06870600 | -6.03616200  | 6.42227700 |
| C | -4.99710300 | -5.78313000  | 8.28195900 |
| H | -4.28658800 | -5.03681500  | 7.89409000 |
| H | -4.43776100 | -6.40252100  | 9.00473100 |
| C | 1.67163300  | 5.36312000   | 8.60938900 |
| H | 2.25089800  | 4.82954100   | 7.84071100 |
| H | 2.40442100  | 5.90182500   | 9.23467200 |

|   |              |             |             |
|---|--------------|-------------|-------------|
| C | 0.91964700   | 4.32263800  | 9.46926900  |
| H | 0.19271700   | 3.78574800  | 8.83939100  |
| H | 0.33891300   | 4.86135300  | 10.24115500 |
| C | 1.85268800   | 3.33757000  | 10.12650000 |
| H | 2.64141500   | 3.77396300  | 10.75051300 |
| C | -5.64401100  | -4.19217900 | 10.14675100 |
| H | -5.04723100  | -4.71032200 | 10.90665900 |
| C | -6.14423000  | -5.05110900 | 9.01366900  |
| H | -6.84627100  | -5.81210600 | 9.40287900  |
| H | -6.70748500  | -4.43529100 | 8.29562200  |
| C | -10.89887200 | -4.51485300 | 4.10799300  |
| C | -9.61884000  | -4.22155800 | 4.66492800  |
| C | -8.47209000  | -4.62428500 | 3.91259700  |
| C | -8.61635700  | -5.05768200 | 2.54989400  |
| C | -9.90779700  | -5.08207000 | 1.93762200  |
| C | -11.03790500 | -4.92824700 | 2.79456000  |
| C | -7.15445200  | -4.41569800 | 4.44592300  |
| C | -6.00834900  | -4.88189900 | 3.73059200  |
| C | -6.15242700  | -5.32025900 | 2.37552800  |
| C | -7.43989000  | -5.27678000 | 1.75403600  |
| C | -4.70384200  | -4.69960400 | 4.27829800  |
| C | -3.55699000  | -5.17265400 | 3.56589900  |
| C | -3.69821700  | -5.59668900 | 2.21211200  |
| C | -4.98680500  | -5.55796600 | 1.58770700  |
| C | -2.25046000  | -5.00502300 | 4.12468400  |
| C | -1.10747000  | -5.47954700 | 3.41126200  |
| C | -1.24913200  | -5.89337200 | 2.04823300  |
| C | -2.53099700  | -5.83599700 | 1.42241700  |
| C | -4.52711500  | -3.85184200 | 5.41374500  |
| C | -3.20512200  | -3.48762500 | 5.82826300  |
| C | -2.07240400  | -4.15817600 | 5.26599800  |
| C | -5.65793100  | -3.19066800 | 5.97624000  |
| C | -5.46576800  | -2.00544900 | 6.75311200  |
| C | -4.14624200  | -1.50286400 | 6.95849200  |
| C | -3.01290300  | -2.30543400 | 6.60544900  |
| C | -6.97771800  | -3.56310800 | 5.57155800  |

|   |              |             |             |
|---|--------------|-------------|-------------|
| C | -8.11968700  | -2.92062200 | 6.15924600  |
| C | -7.92741900  | -1.72451700 | 6.93145600  |
| C | -6.59846300  | -1.20552900 | 7.10134100  |
| C | -9.43855500  | -3.34986500 | 5.81424700  |
| C | -10.52560500 | -2.71243000 | 6.48283800  |
| C | -10.34082400 | -1.55885900 | 7.22476600  |
| C | -9.05479600  | -0.95541300 | 7.35537900  |
| C | -6.41619500  | 0.17141700  | 7.41093400  |
| C | -7.56539300  | 1.02426000  | 7.53850700  |
| C | -8.86968000  | 0.45275900  | 7.66328700  |
| C | -5.10251800  | 0.73642600  | 7.36580100  |
| C | -3.96227800  | -0.11729100 | 7.26574500  |
| C | -2.64671000  | 0.44917800  | 7.21062700  |
| C | -1.50416100  | -0.40900200 | 7.10557000  |
| C | -1.68834400  | -1.79789300 | 6.80291400  |
| C | -0.55880800  | -2.59792500 | 6.44406500  |
| C | -0.75245700  | -3.78914700 | 5.67126600  |
| C | -0.19314100  | 0.15693800  | 7.04122200  |
| C | 0.95038700   | -0.69931300 | 6.92896600  |
| C | 0.76646700   | -2.08492000 | 6.62902300  |
| C | 1.89863700   | -2.88633800 | 6.26887900  |
| C | 1.70443900   | -4.07998100 | 5.49954800  |
| C | 0.38072700   | -4.45451400 | 5.09929700  |
| C | 0.20219500   | -5.30513400 | 3.96427200  |
| C | -0.08259800  | -6.13470100 | 1.25424400  |
| C | 1.20335500   | -6.19564500 | 1.88039300  |
| C | 1.34699500   | -5.77794000 | 3.24398700  |
| C | 2.65436400   | -5.59966900 | 3.79223900  |
| C | 2.83439400   | -4.74342100 | 4.92796900  |
| C | 3.79925400   | -6.06533600 | 3.06829200  |
| C | 3.65511500   | -6.48480400 | 1.71018500  |
| C | 2.36734500   | -6.43381100 | 1.08658000  |
| C | 2.27521200   | -6.37115800 | -0.34291500 |
| C | 1.02110300   | -6.06981100 | -0.95664600 |
| C | -0.17309100  | -6.06742900 | -0.16890100 |
| C | -1.42883900  | -5.77344200 | -0.78643800 |

|   |             |             |             |
|---|-------------|-------------|-------------|
| C | -2.62101600 | -5.78039400 | -0.00370900 |
| C | 4.82382400  | -6.71996600 | 0.91435400  |
| C | 4.73163400  | -6.65964600 | -0.51317100 |
| C | 3.47178100  | -6.36470400 | -1.12964900 |
| C | 3.44290900  | -5.83109600 | -2.45482500 |
| C | 2.21721400  | -5.31211100 | -2.98378200 |
| C | 0.99159400  | -5.53771500 | -2.28609900 |
| C | -0.23331000 | -5.01778900 | -2.81225200 |
| C | -1.46027500 | -5.24936200 | -2.11508000 |
| C | -0.19825600 | -4.07744200 | -3.88633700 |
| C | 1.06428600  | -3.65990600 | -4.41950800 |
| C | 2.25479000  | -4.36250100 | -4.05766200 |
| C | 3.51889400  | -3.93679400 | -4.57870700 |
| C | 4.71358000  | -4.63977400 | -4.21399100 |
| C | 4.67511500  | -5.59426600 | -3.14749600 |
| C | 5.89836600  | -6.10977400 | -2.62162100 |
| C | 5.92668600  | -6.64823500 | -1.29433600 |
| C | 3.61962200  | -2.67861300 | -5.24865400 |
| C | 2.45492200  | -1.85755400 | -5.39091800 |
| C | 1.16570900  | -2.39662200 | -5.08965200 |
| C | 0.00221600  | -1.57065600 | -5.21499200 |
| C | -1.28916500 | -2.10778600 | -4.90784300 |
| C | -1.39079400 | -3.36896100 | -4.24031500 |
| C | -2.64754700 | -3.78272800 | -3.70364200 |
| C | -2.68349400 | -4.73776800 | -2.64046400 |
| C | 0.15460800  | -0.16175100 | -5.39116300 |
| C | 1.46596100  | 0.40900200  | -5.46209100 |
| C | 2.60633200  | -0.44394600 | -5.58172800 |
| C | 3.91891000  | 0.12741400  | -5.63592700 |
| C | 5.06391200  | -0.72825300 | -5.74388600 |
| C | 4.91338800  | -2.13871800 | -5.54758500 |
| C | 6.07567200  | -2.95544900 | -5.40436400 |
| C | 5.97488800  | -4.21629900 | -4.73162300 |
| C | 4.10131600  | 1.51358800  | -5.33747300 |
| C | 2.96967700  | 2.31818100  | -4.98630000 |
| C | 1.64999500  | 1.79883100  | -5.15990000 |

|   |             |             |             |
|---|-------------|-------------|-------------|
| C | 0.51923900  | 2.59549000  | -4.79076600 |
| C | -0.80249000 | 2.07768000  | -4.96587200 |
| C | -0.98606500 | 0.69280900  | -5.26450100 |
| C | -2.29354800 | 0.12913800  | -5.20541100 |
| C | -2.44618200 | -1.28055300 | -5.02685600 |
| C | 0.71172300  | 3.79374000  | -4.04141400 |
| C | 2.03326500  | 4.18748700  | -3.66147000 |
| C | 3.16264100  | 3.52210100  | -4.22956000 |
| C | 4.48510100  | 3.90307900  | -3.83377500 |
| C | 5.61912400  | 3.22910700  | -4.39503700 |
| C | 5.42631000  | 2.02850800  | -5.15175100 |
| C | 6.55637400  | 1.22732200  | -5.49820100 |
| C | 6.37370200  | -0.16216400 | -5.79634600 |
| C | 4.66444200  | 4.76778400  | -2.70969100 |
| C | 3.52034400  | 5.24681000  | -1.99400100 |
| C | 2.21307200  | 5.06193200  | -2.54079400 |
| C | 1.06763700  | 5.52539600  | -1.81826600 |
| C | -0.24155200 | 5.33317900  | -2.36213900 |
| C | -0.41945100 | 4.46369100  | -3.48154400 |
| C | -1.73646300 | 4.07993000  | -3.87218400 |
| C | -1.92947300 | 2.87870700  | -4.61965900 |
| C | 1.21030100  | 5.94009300  | -0.45980100 |
| C | 2.49748500  | 5.89242000  | 0.16390300  |
| C | 3.66396700  | 5.66671200  | -0.63011200 |
| C | 4.94969000  | 5.60360200  | -0.00239700 |
| C | 6.11892300  | 5.36554500  | -0.79640400 |
| C | 5.97536400  | 4.94464500  | -2.15752300 |
| C | 7.11777300  | 4.46771400  | -2.86860800 |
| C | 6.93829400  | 3.60359800  | -3.99732500 |
| C | 5.03992600  | 5.53031400  | 1.42211200  |
| C | 3.84260200  | 5.51490900  | 2.20711900  |
| C | 2.58732300  | 5.80949200  | 1.59172700  |
| C | 1.38799500  | 5.77368800  | 2.37261000  |
| C | 0.13013600  | 6.07103900  | 1.76041600  |
| C | 0.04137400  | 6.15392400  | 0.33637800  |
| C | -1.24198200 | 6.20450300  | -0.28390000 |



|   |             |             |             |
|---|-------------|-------------|-------------|
| C | -1.38458700 | 5.78971800  | -1.64302100 |
| C | 6.29842300  | 5.22636600  | 2.03716800  |
| C | 7.49284300  | 5.23448600  | 1.25509500  |
| C | 7.40199900  | 5.30302900  | -0.17311200 |
| C | -1.06258900 | 6.05477100  | 2.54378200  |
| C | 1.41565500  | 5.22567200  | 3.68965300  |
| C | 2.64316800  | 4.71443100  | 4.21729300  |
| C | 3.87049600  | 4.96371500  | 3.53039500  |
| C | 5.09573300  | 4.44044400  | 4.05447100  |
| C | 6.32673300  | 4.68003300  | 3.36051600  |
| C | 5.05946400  | 3.48831600  | 5.11944100  |
| C | 3.79879100  | 3.06817800  | 5.65350600  |
| C | 2.60692000  | 3.76292100  | 5.28618400  |
| C | 1.34488100  | 3.34121700  | 5.81517900  |
| C | 0.15240700  | 4.04467100  | 5.45687400  |
| C | 0.18838900  | 4.99072700  | 4.38568500  |
| C | -1.03370000 | 5.51440200  | 3.86767900  |
| C | 3.70048700  | 1.81379100  | 6.33994300  |
| C | 2.41333000  | 1.27868100  | 6.65229800  |
| C | 1.24769800  | 2.09557900  | 6.50378300  |
| C | -0.04273900 | 1.56500300  | 6.82486000  |
| C | -1.20412900 | 2.38626500  | 6.68796300  |
| C | -1.10542100 | 3.63691000  | 5.99698300  |
| C | -2.29719900 | 4.34488000  | 5.63891600  |
| C | -2.26097300 | 5.28933400  | 4.56837000  |
| C | -3.48720500 | 5.81667000  | 4.04631500  |
| C | 7.54916100  | 4.15461100  | 3.87825700  |
| C | 7.51265100  | 3.19838000  | 4.94463800  |
| C | 6.25460400  | 2.78348500  | 5.47759400  |
| C | 6.15651100  | 1.52775000  | 6.15840500  |
| C | 4.86509900  | 0.99274900  | 6.47642700  |
| C | 4.71605900  | -0.41306300 | 6.68234700  |
| C | 3.40416500  | -0.98348500 | 6.75277100  |
| C | 2.26363300  | -0.12981000 | 6.86450700  |
| C | -2.49599700 | 1.85445600  | 7.00225600  |
| C | -3.66107600 | 2.67792100  | 6.85780900  |

|   |             |             |             |
|---|-------------|-------------|-------------|
| C | -3.56124800 | 3.93131300  | 6.17270800  |
| C | -4.75168100 | 4.63123900  | 5.80793000  |
| C | -4.71445900 | 5.58233800  | 4.73656900  |
| C | 8.77816200  | 4.38795800  | 3.18363200  |
| C | 10.01389000 | 3.88180700  | 3.71479400  |
| C | 9.97707400  | 2.92144300  | 4.78299400  |
| C | 8.70553600  | 2.49065600  | 5.29586800  |
| C | 8.60778100  | 1.24019400  | 5.96977100  |
| C | 7.31833300  | 0.70851400  | 6.28926500  |
| C | 7.16878800  | -0.70152900 | 6.49364000  |
| C | 5.86023400  | -1.26819900 | 6.56505900  |
| C | 3.22012100  | -2.37301300 | 6.45187600  |
| C | 4.35142500  | -3.17154300 | 6.08594800  |
| C | 5.67679300  | -2.65594200 | 6.26554300  |
| C | 9.78169500  | 0.42560000  | 6.12360700  |
| C | 9.63154200  | -0.98885800 | 6.32668400  |
| C | 8.31120200  | -1.55432100 | 6.37256200  |
| C | 8.12891700  | -2.93475800 | 6.07573600  |
| C | 6.80573700  | -3.45056600 | 5.90154900  |
| C | 6.61149500  | -4.64636400 | 5.13713800  |
| C | 5.29152800  | -5.02617500 | 4.74768800  |
| C | 4.15772800  | -4.36254600 | 5.32129200  |
| C | -4.95095000 | 2.14623800  | 7.16141400  |
| C | 8.74976200  | 4.92919000  | 1.86688100  |
| C | -3.51670100 | 6.35515800  | 2.72040700  |
| C | -2.32015600 | 6.35819200  | 1.93271800  |
| C | -2.41034800 | 6.42719500  | 0.51137900  |
| C | 9.95701500  | 4.96052100  | 1.08778000  |
| C | 9.86553500  | 5.02643000  | -0.34467500 |
| C | 8.56932700  | 5.06156300  | -0.96418000 |
| C | 8.42651000  | 4.64171800  | -2.31719500 |
| C | -4.77121300 | 6.65252200  | 2.10771500  |
| C | -4.86193400 | 6.72143500  | 0.67907000  |
| C | -3.69704800 | 6.49084500  | -0.11253400 |
| C | -3.83920600 | 6.07587300  | -1.47386200 |
| C | -2.69214000 | 5.60525300  | -2.18965800 |

|   |             |             |             |
|---|-------------|-------------|-------------|
| C | -2.86960600 | 4.75109500  | -3.31484300 |
| C | 9.58083000  | 4.18762600  | -3.04275800 |
| C | 9.40106100  | 3.32187500  | -4.17531900 |
| C | 8.07123900  | 2.93034100  | -4.55452400 |
| C | 7.87959100  | 1.73789200  | -5.30858800 |
| C | -5.14427900 | 5.90069800  | -2.02319600 |
| C | -5.32286400 | 5.04364200  | -3.15774600 |
| C | -4.19185800 | 4.37893200  | -3.72013500 |
| C | -4.38415700 | 3.17773800  | -4.47389600 |
| C | -3.25051700 | 2.36862900  | -4.80888500 |
| C | -3.43198300 | 0.98485800  | -5.09185100 |
| C | 9.01890400  | 0.94456800  | -5.68023400 |
| C | 8.83568800  | -0.44896400 | -5.97865800 |
| C | 7.51751000  | -1.01583200 | -5.89886800 |
| C | 7.36793800  | -2.41792600 | -5.70124900 |
| C | -5.70394000 | 2.66538300  | -4.65636700 |
| C | -5.88670000 | 1.27290000  | -4.94320200 |
| C | -4.74641500 | 0.42071500  | -5.04289100 |
| C | -4.89823900 | -0.98668300 | -4.84413500 |
| C | -3.73439600 | -1.81106300 | -4.70887300 |
| C | -3.83485100 | -3.06399500 | -4.04015300 |
| C | 8.53728400  | -3.24496100 | -5.58284300 |
| C | 8.43629600  | -4.50925700 | -4.90755300 |
| C | 7.16835200  | -4.91638900 | -4.36736300 |
| C | 7.12985700  | -5.86770600 | -3.30874000 |
| C | -6.18707400 | -1.52061800 | -4.54398300 |
| C | -6.28672600 | -2.78087600 | -3.87000400 |
| C | -5.09750900 | -3.48150500 | -3.51210000 |
| C | -5.13751300 | -4.45135900 | -2.46525300 |
| C | -3.91050000 | -4.97441500 | -1.94616100 |
| C | -3.87979600 | -5.50177500 | -0.62217800 |
| C | 8.35932300  | -6.40819800 | -2.79740300 |
| C | 8.38730600  | -6.95113600 | -1.46732500 |
| C | 7.18558800  | -6.93841400 | -0.67915300 |
| C | 7.27706900  | -6.99942500 | 0.74046000  |
| C | 6.10903200  | -6.76878700 | 1.53410600  |

|   |             |             |             |
|---|-------------|-------------|-------------|
| C | 6.25393600  | -6.34638600 | 2.89529700  |
| C | 5.11126200  | -5.88315800 | 3.61528400  |
| C | -6.36579400 | -4.69267600 | -1.77938600 |
| C | -6.33690600 | -5.23102200 | -0.45250800 |
| C | -5.07945000 | -5.51624500 | 0.16095900  |
| C | 8.56946300  | -7.07415200 | 1.36449500  |
| C | 8.71497800  | -6.64915800 | 2.72937000  |
| C | 7.56448300  | -6.16046200 | 3.43848100  |
| C | 7.74400700  | -5.30627000 | 4.56330800  |
| C | 9.07327000  | -4.94277300 | 4.97093900  |
| C | 9.26813100  | -3.74191600 | 5.73537600  |
| C | 11.07541200 | 0.98201600  | 5.87927900  |
| C | 11.17541100 | 2.25985700  | 5.19475500  |
| C | 10.77508800 | -1.84526200 | 6.28358800  |
| C | 10.58908100 | -3.25435300 | 5.98131200  |
| C | 11.22019900 | 4.73202700  | 1.71658100  |
| C | 11.24927300 | 4.18058100  | 3.06066400  |
| C | 10.53225500 | 2.70191400  | -4.79105300 |
| C | 10.33664400 | 1.48559900  | -5.56160600 |
| C | 10.89138800 | 4.43228400  | -2.52733200 |
| C | 11.03710000 | 4.86197000  | -1.14687900 |
| C | 10.01613400 | -6.52985000 | 3.30906500  |
| C | 10.19967300 | -5.65560700 | 4.45510000  |
| C | 9.72526000  | -7.38029000 | 0.58116400  |
| C | 9.63220600  | -7.31677400 | -0.86752100 |
| C | 9.61604300  | -5.25732900 | -4.60462700 |
| C | 9.57643500  | -6.22962800 | -3.52544300 |
| C | 9.81791500  | -2.73025600 | -5.95442900 |
| C | 9.97043800  | -1.29959800 | -6.15784900 |
| C | -6.11566000 | 2.96413300  | 7.01012500  |
| C | -6.01567200 | 4.21187300  | 6.33123400  |
| C | -7.53240900 | -5.23051900 | 0.33355700  |
| C | -7.34925300 | -0.69763000 | -4.67778500 |
| C | -7.19850200 | 0.70503300  | -4.87916000 |
| C | -7.54974100 | -3.20309100 | -3.34938700 |
| C | -7.58930700 | -4.16299000 | -2.29725200 |

|   |             |             |             |
|---|-------------|-------------|-------------|
| C | -5.94035600 | 6.09935300  | 4.20891100  |
| C | -5.96885300 | 6.63666200  | 2.88999600  |
| C | -6.29028100 | 6.36129800  | -1.30058900 |
| C | -6.14868400 | 6.77332200  | 0.05578500  |
| C | -6.64447300 | 4.65856600  | -3.54711800 |
| C | -6.83608000 | 3.46400500  | -4.29970700 |
| C | 11.67386000 | -4.13269100 | 5.68649000  |
| C | 11.48616200 | -5.28976000 | 4.95145500  |
| C | 12.05802900 | -1.22196800 | 6.31031800  |
| C | 12.20267200 | 0.14023100  | 6.11575000  |
| C | 11.10678000 | -7.09850800 | 2.58646700  |
| C | 10.96655900 | -7.50829300 | 1.27243500  |
| C | 12.44518100 | 3.70679800  | 3.67737900  |
| C | 12.40966200 | 2.78142300  | 4.70533900  |
| C | 12.29666400 | 4.90729200  | -0.47878700 |
| C | 12.38490500 | 4.84501800  | 0.90062200  |
| C | 11.99563000 | 4.01823300  | -3.32998900 |
| C | 11.82260600 | 3.18466500  | -4.42067700 |
| C | 10.77460400 | -7.37568100 | -1.71990200 |
| C | 10.74783500 | -6.85165700 | -3.00014600 |
| C | 10.82997000 | -4.84147500 | -5.22804900 |
| C | 10.92721300 | -3.62405800 | -5.87830800 |
| C | 11.24216500 | -0.66911600 | -6.30035000 |
| C | 11.41859000 | 0.67276600  | -6.01310400 |
| C | -8.16641200 | 2.95585500  | -4.49601200 |
| C | -8.35007900 | 1.56051700  | -4.79009000 |
| C | -7.78446800 | 5.33614600  | -2.99306800 |
| C | -7.60526600 | 6.19860600  | -1.85708400 |
| C | -8.64967400 | -1.23830100 | -4.39088200 |
| C | -8.75100900 | -2.50572600 | -3.71947500 |
| C | -7.23082800 | 6.95564600  | 2.28032100  |
| C | -7.32171300 | 7.02448700  | 0.84724300  |
| C | -7.21302000 | 4.92820600  | 5.98528400  |
| C | -7.17490800 | 5.88324900  | 4.91199200  |
| C | -7.41314200 | 2.43845000  | 7.33586600  |
| C | -8.82925800 | -4.41412200 | -1.61540800 |

|   |              |             |             |
|---|--------------|-------------|-------------|
| C | -8.80068200  | -4.95480400 | -0.28390600 |
| C | -8.56620800  | 3.27941100  | 7.25834000  |
| C | -8.46346500  | 4.55413300  | 6.56828800  |
| C | -10.00193400 | -5.02651400 | 0.48801100  |
| C | -9.81618100  | -0.43707400 | -4.59302000 |
| C | -9.66286300  | 0.99433900  | -4.79653200 |
| C | -10.01917800 | -2.96961700 | -3.25041400 |
| C | -10.05902200 | -3.94457500 | -2.17264800 |
| C | -8.38658800  | 6.46437600  | 4.42423400  |
| C | -8.41529300  | 7.01265500  | 3.07854000  |
| C | -8.74243300  | 6.72476500  | -1.16893200 |
| C | -8.59727000  | 7.14810300  | 0.21397500  |
| C | -9.10084900  | 4.99985300  | -3.43705200 |
| C | -9.29638900  | 3.78205500  | -4.20614200 |
| C | -10.58707300 | 3.24395500  | -4.48825800 |
| C | -10.76366500 | 1.90134000  | -4.77290300 |
| C | -10.18362500 | 5.75743900  | -2.89969300 |
| C | -10.01102000 | 6.58879400  | -1.80720100 |
| C | -11.07982900 | -1.05477300 | -4.35514700 |
| C | -11.17751100 | -2.27444000 | -3.70861900 |
| C | -9.62295800  | 7.40182900  | 2.42648600  |
| C | -9.71054000  | 7.46676100  | 1.04712000  |
| C | -9.60086800  | 5.34957400  | 6.23874700  |
| C | -9.56377000  | 6.26965100  | 5.20610300  |
| C | -9.81335800  | 2.71472300  | 7.66007100  |
| C | -9.95972000  | 1.35271800  | 7.85522600  |
| C | -11.25948400 | -4.28442200 | -1.48108900 |
| C | -11.23214300 | -4.80579000 | -0.19951200 |
| H | 12.70723400  | 2.82272000  | -4.94203500 |
| H | 13.00988200  | 4.28104100  | -3.03399200 |
| H | 12.42688500  | 1.08211900  | -6.04717700 |
| H | 13.21837800  | 4.89793300  | -1.05823500 |
| H | 11.73049900  | -5.44318100 | -5.11676200 |
| H | 11.90062900  | -3.31330000 | -6.25419600 |
| H | 11.67287000  | -6.83795300 | -3.57418100 |
| H | 12.11813800  | -1.26563300 | -6.54983200 |

|   |              |             |             |
|---|--------------|-------------|-------------|
| H | 12.09738800  | -7.13138500 | 3.03700200  |
| H | 11.85214600  | -7.84849800 | 0.73824900  |
| H | 12.36102100  | -5.87538200 | 4.67391400  |
| H | 11.71968700  | -7.75478100 | -1.33460500 |
| H | 13.37279200  | 4.78919100  | 1.35483700  |
| H | 13.41444500  | 4.00196600  | 3.27895700  |
| H | 13.20899200  | 0.55071700  | 6.05122600  |
| H | 12.95583400  | -1.83251700 | 6.39144100  |
| H | 13.35213600  | 2.38282700  | 5.07716200  |
| H | 12.68937000  | -3.85084800 | 5.95977900  |
| H | -10.95394400 | 0.96267700  | 8.06684800  |
| H | -10.69812300 | 3.34573000  | 7.72602600  |
| H | -11.21724300 | -1.06062900 | 7.63594700  |
| H | -10.54995600 | 5.17322000  | 6.74222600  |
| H | -12.04275500 | -5.04836900 | 2.39299100  |
| H | -11.79934300 | -4.32574300 | 4.69005200  |
| H | -12.17771600 | -4.95778000 | 0.31836600  |
| H | -11.54063700 | -3.07880800 | 6.33847200  |
| H | -11.99789500 | -0.52299800 | -4.59971500 |
| H | -12.16876400 | -2.65575000 | -3.46888500 |
| H | -11.77895800 | 1.52509100  | -4.88707900 |
| H | -12.22565000 | -4.04588200 | -1.92274500 |
| H | -10.48509100 | 6.78315400  | 4.93627300  |
| H | -10.52664900 | 7.56509600  | 3.01130900  |
| H | -10.88847600 | 7.07000100  | -1.37836100 |
| H | -11.19046900 | 5.61556000  | -3.28906900 |
| H | -10.67996900 | 7.67833800  | 0.59896400  |
| H | -11.47012700 | 3.87310800  | -4.38903900 |
| C | -5.84998500  | -2.87248000 | 10.26608500 |
| H | -6.43351700  | -2.32243700 | 9.52569200  |
| C | 1.79981900   | 2.00568900  | 9.97809900  |
| H | 1.03266600   | 1.53538200  | 9.36032900  |
| H | 2.51699000   | 1.34501000  | 10.46860300 |
| H | -5.44529400  | -2.30303900 | 11.10496800 |

(5,5)@Cycle-6

|   |             |             |             |
|---|-------------|-------------|-------------|
| C | 1.62477100  | -0.44129300 | -6.31764200 |
| C | 4.04061300  | -0.47895200 | -6.17692100 |
| C | 1.62451800  | 0.93553000  | -6.03860200 |
| H | 0.67593200  | -0.96025900 | -6.46753000 |
| C | 4.04262800  | 0.88718400  | -5.89121000 |
| H | 4.97852500  | -1.03434700 | -6.20489000 |
| H | 0.68589000  | 1.47884400  | -5.94719200 |
| H | 4.98748500  | 1.39633300  | -5.69277000 |
| C | 0.39368000  | 7.33359400  | -0.12069200 |
| C | 1.82230200  | 9.02869200  | -1.30219900 |
| C | 1.27121600  | 7.77273000  | -1.22780100 |
| C | 1.40676900  | 6.75341300  | -2.29105700 |
| C | 2.63252800  | 6.46752900  | -2.91633200 |
| C | 0.40446800  | 4.94048900  | -3.57914800 |
| C | 2.76484900  | 5.45335800  | -3.87281800 |
| H | 3.52460500  | 7.01580800  | -2.61614800 |
| H | -0.41295400 | 4.25748700  | -3.79273200 |
| H | 3.73692400  | 5.26835200  | -4.32370800 |
| C | 2.83544700  | 1.60929500  | -5.81713100 |
| C | 1.64250000  | 4.66822600  | -4.18853900 |
| C | 2.92530900  | 3.08033600  | -5.46341500 |
| H | 3.27383900  | 3.67739500  | -6.32725400 |
| H | 3.67143100  | 3.18772200  | -4.66023200 |
| O | 1.65489200  | 3.57847900  | -5.02694000 |
| C | 0.25799300  | 5.97096400  | -2.63530600 |
| C | -1.00336500 | 6.21621500  | -1.88909900 |
| C | -2.25726100 | 6.10435700  | -2.45599000 |
| S | -2.56892800 | 5.61133800  | -4.15601000 |
| S | -3.78460000 | 6.51714000  | -1.60125400 |
| C | -4.30901000 | 5.85190100  | -4.12337200 |
| H | -4.85826300 | 5.64119300  | -5.03865200 |
| C | -4.85962700 | 6.26118700  | -2.96437300 |
| H | -5.92228900 | 6.42598800  | -2.79895100 |
| S | 2.75382400  | 9.63093800  | -2.71945600 |
| C | 2.22721000  | 11.62895000 | -1.03227200 |
| H | 2.18362500  | 12.62913700 | -0.60569600 |



|   |             |             |             |
|---|-------------|-------------|-------------|
| S | 1.58372600  | 10.30859500 | -0.06046400 |
| C | 2.75651200  | 11.32374400 | -2.23262200 |
| H | 3.20372400  | 12.03997900 | -2.91901700 |
| C | -0.14434700 | 7.11086000  | 2.26245000  |
| C | -0.78039400 | 6.59329700  | -0.46986900 |
| C | -1.60467800 | 6.15739200  | 0.58123700  |
| H | -2.47122500 | 5.54097700  | 0.36342400  |
| C | -1.31158100 | 6.40184000  | 1.92652200  |
| H | -1.96723900 | 5.98272100  | 2.68537700  |
| C | 0.70167100  | 7.56254600  | 1.22950300  |
| H | 1.63181500  | 8.05364100  | 1.51019400  |
| O | 0.26348500  | 7.40734100  | 3.53749500  |
| C | -0.01381000 | 5.31315800  | 4.83087700  |
| H | 0.96981200  | 5.28196600  | 5.32553400  |
| H | 0.11295400  | 4.84732500  | 3.84435100  |
| C | -1.05350100 | 4.50723500  | 5.63630000  |
| H | -1.91193100 | 4.29235300  | 4.97725600  |
| H | -1.44839800 | 5.11465400  | 6.46985300  |
| C | -0.49763600 | 3.18310000  | 6.19842600  |
| H | 0.13898500  | 3.39669000  | 7.07445000  |
| H | 0.15783800  | 2.71318500  | 5.45274700  |
| C | -1.60326400 | 2.18913700  | 6.58386700  |
| H | -2.22164300 | 1.97917800  | 5.69728100  |
| H | -2.27531700 | 2.64840700  | 7.33014300  |
| C | -0.43325300 | 6.77959000  | 4.63491800  |
| H | -0.16564500 | 7.38411700  | 5.51221300  |
| H | -1.52419200 | 6.86732400  | 4.49508500  |
| C | -1.05847000 | 0.85847600  | 7.14661100  |
| C | -2.16918900 | -0.10016000 | 7.49713400  |
| C | -2.24364200 | -1.41528400 | 7.22256500  |
| O | 2.10989800  | -5.85819000 | 3.30644600  |
| C | 2.71622100  | -6.06573900 | 2.09661300  |
| C | 3.73761900  | -6.30141000 | -0.53606200 |
| C | 1.84347600  | -6.21325400 | 1.00364900  |
| H | 0.77781000  | -6.12874100 | 1.20093800  |
| C | 4.10666200  | -6.06591600 | 1.88080100  |

|   |             |             |             |
|---|-------------|-------------|-------------|
| H | 4.80525400  | -5.90313700 | 2.69688200  |
| C | 4.59250000  | -6.16903800 | 0.57254800  |
| H | 5.66325800  | -6.05715200 | 0.41162100  |
| C | 2.32582600  | -6.33836000 | -0.30772200 |
| C | 1.42814200  | -6.40438200 | -1.48653900 |
| C | 4.22163800  | -6.30094300 | -1.93363400 |
| C | 3.34163100  | -5.55567300 | -2.86236800 |
| C | 1.92584200  | -5.64114800 | -2.65421900 |
| C | 3.83772600  | -4.76337600 | -3.90752200 |
| H | 4.90821400  | -4.61241000 | -4.03056300 |
| C | 1.09117900  | -4.93525100 | -3.53772300 |
| H | 0.02014200  | -4.90322500 | -3.35402400 |
| C | 1.58899500  | -4.17600400 | -4.60502000 |
| H | 0.88792900  | -3.61464700 | -5.21763100 |
| C | 2.97647400  | -4.09541600 | -4.80100200 |
| O | 3.61485000  | -3.42064500 | -5.81179900 |
| C | 2.82796700  | -1.16109400 | -6.39313600 |
| C | 2.86464400  | -2.63109300 | -6.76196800 |
| C | 5.32611900  | -7.00950300 | -2.34985400 |
| C | 0.27114200  | -7.15416100 | -1.50307100 |
| S | 5.88370600  | -7.11292900 | -4.05707900 |
| S | 6.30061200  | -8.06311000 | -1.26448700 |
| S | -0.30372200 | -8.15524200 | -0.12367100 |
| S | -0.78033400 | -7.35239300 | -2.94818600 |
| C | 7.19668300  | -8.87418300 | -2.54423900 |
| H | 7.87662900  | -9.67106600 | -2.24961700 |
| C | 7.00717600  | -8.44519300 | -3.80679800 |
| H | 7.51104300  | -8.84403300 | -4.68500400 |
| C | -1.76703300 | -8.65400100 | -2.29482500 |
| H | -2.51951900 | -9.08712500 | -2.95067900 |
| C | -1.55048900 | -9.01685600 | -1.01612800 |
| H | -2.10197700 | -9.78831500 | -0.48246000 |
| H | 3.41944100  | -2.76237100 | -7.70321800 |
| H | 1.85221400  | -3.03138300 | -6.91608600 |
| H | -3.01022900 | 0.35164500  | 8.03536600  |
| H | -0.36375100 | 0.40569900  | 6.42434100  |

|   |             |             |             |
|---|-------------|-------------|-------------|
| H | -0.46403600 | 1.08457200  | 8.05216800  |
| C | -1.20716500 | -2.28494800 | 6.55183200  |
| H | -1.71740100 | -3.01047700 | 5.89669500  |
| H | -3.13029300 | -1.95211300 | 7.57678500  |
| C | -0.35058800 | -3.05849600 | 7.59012900  |
| H | 0.42713900  | -2.37912200 | 7.97714700  |
| H | -0.98379800 | -3.32379900 | 8.45318000  |
| C | 0.29537200  | -4.35430700 | 7.06476100  |
| H | -0.50157100 | -5.07558900 | 6.81246400  |
| H | 0.86713500  | -4.80706000 | 7.89413100  |
| C | 1.22733800  | -4.21540900 | 5.84331900  |
| H | 0.64083100  | -4.03848000 | 4.93027800  |
| H | 1.89140700  | -3.34306000 | 5.96595300  |
| C | 2.08177200  | -5.48825300 | 5.68606400  |
| H | 1.43189700  | -6.37864000 | 5.69960400  |
| H | -0.54693000 | -1.69104300 | 5.90759700  |
| C | 2.95648700  | -5.56813500 | 4.43670500  |
| H | 3.49949400  | -4.62419700 | 4.25376800  |
| H | 3.69875400  | -6.37755500 | 4.54979700  |
| H | 2.74811400  | -5.57420800 | 6.56074200  |
| C | 10.28771000 | 3.88255600  | -0.75252900 |
| C | 10.41563200 | 2.99430400  | -1.80409900 |
| C | 9.29349200  | 2.21589000  | -2.23914900 |
| C | 7.99817600  | 2.70566000  | -1.89261200 |
| C | 7.86438800  | 3.63165300  | -0.79559600 |
| C | 9.03108900  | 4.03777900  | -0.08065700 |
| C | 6.82426500  | 1.99973400  | -2.33247200 |
| C | 6.95026100  | 0.61865300  | -2.67084000 |
| C | 8.24478300  | 0.00071500  | -2.55686100 |
| C | 9.42196700  | 0.80760800  | -2.58485500 |
| C | 8.31738500  | -1.33488300 | -2.01793200 |
| C | 9.56495600  | -1.81947300 | -1.52213500 |
| C | 10.74725500 | -1.15933900 | -1.99188200 |
| C | 10.67766300 | 0.12077900  | -2.50961500 |
| C | 6.56504700  | 3.79861400  | -0.19954000 |
| C | 5.38887500  | 3.45025700  | -0.94025400 |

|   |             |             |             |
|---|-------------|-------------|-------------|
| C | 5.52394200  | 2.52364500  | -2.03527800 |
| C | 4.36618900  | 1.81399100  | -2.47393600 |
| C | 4.49434600  | 0.42482600  | -2.81624200 |
| C | 5.77257000  | -0.19582500 | -2.70334700 |
| C | 5.84534500  | -1.53234100 | -2.16980600 |
| C | 7.09205600  | -1.97801500 | -1.62329300 |
| C | 4.10362700  | 3.62487100  | -0.34320000 |
| C | 2.92838200  | 3.24913300  | -1.07582800 |
| C | 3.06288100  | 2.32494800  | -2.15884100 |
| C | 1.90470800  | 1.61748800  | -2.61241300 |
| C | 2.03318700  | 0.23265500  | -2.96056700 |
| C | 3.31407300  | -0.38900700 | -2.83488300 |
| C | 3.38493200  | -1.71138400 | -2.30107900 |
| C | 4.63541100  | -2.17521300 | -1.77311700 |
| C | 1.63796800  | 3.42322700  | -0.48050800 |
| C | -0.55351700 | 1.42916100  | -2.77090400 |
| C | -0.42749800 | 0.04629900  | -3.11609000 |
| C | 0.85784800  | -0.57533000 | -2.98541900 |
| C | 0.92742400  | -1.89425500 | -2.43222900 |
| C | 2.16937500  | -2.34914100 | -1.90058300 |
| C | -0.81757500 | 3.19804700  | -0.61644800 |
| C | -1.98994200 | 2.85568400  | -1.36291500 |
| C | -1.85615000 | 1.95048000  | -2.47246600 |
| C | -3.01603400 | 1.24968300  | -2.92480800 |
| C | -2.88907800 | -0.14477900 | -3.26293100 |
| C | -1.60853900 | -0.76689400 | -3.13889300 |
| C | -1.53674700 | -2.09391900 | -2.58317800 |
| C | -0.28966900 | -2.53610900 | -2.03327400 |
| C | -3.27486200 | 3.02915700  | -0.76702400 |
| C | -4.44938400 | 2.66913200  | -1.50488900 |
| C | -4.31773000 | 1.76055000  | -2.60377300 |
| C | -5.48459500 | 1.05641200  | -3.05538200 |
| C | -5.35768800 | -0.33668400 | -3.39422900 |
| C | -4.07020500 | -0.95914500 | -3.26591000 |
| C | -3.99763800 | -2.28133200 | -2.71899400 |
| C | -2.74724900 | -2.74077700 | -2.18688000 |

|   |              |             |             |
|---|--------------|-------------|-------------|
| C | -5.74165900  | 2.84574400  | -0.90534700 |
| C | -6.91146700  | 2.48732000  | -1.64047000 |
| C | -6.77958800  | 1.56855300  | -2.74202600 |
| C | -7.94461100  | 0.85434300  | -3.17454100 |
| C | -7.81892400  | -0.52551000 | -3.51190100 |
| C | -6.53221600  | -1.14769500 | -3.40534200 |
| C | -6.45915200  | -2.47762200 | -2.85838700 |
| C | -5.21534600  | -2.93170200 | -2.32497600 |
| C | -8.20174000  | 2.64242500  | -1.03505500 |
| C | -9.38670700  | 2.28859700  | -1.77086100 |
| C | -9.25426900  | 1.36723700  | -2.87178700 |
| C | -10.41272800 | 0.68851100  | -3.35637800 |
| C | -10.28438800 | -0.71918100 | -3.70151000 |
| C | -9.00776000  | -1.33541600 | -3.53414800 |
| C | -8.93462600  | -2.66776500 | -2.98869100 |
| C | -7.67701600  | -3.11363400 | -2.45029900 |
| C | -10.67366000 | 2.50217900  | -1.19148400 |
| C | -11.80964000 | 2.16528900  | -1.99866000 |
| C | -11.68251600 | 1.28113500  | -3.05350300 |
| C | -10.14058800 | -3.34160200 | -2.62933500 |
| C | -11.35030000 | -2.86949500 | -3.23666500 |
| C | -11.42046800 | -1.59148000 | -3.75871500 |
| C | -7.68645100  | -3.86815700 | -1.24035400 |
| C | -8.95326500  | -4.14718300 | -0.61805800 |
| C | -10.15012900 | -4.11235900 | -1.39527100 |
| C | -5.22486800  | -3.69262100 | -1.10346900 |
| C | -6.47787400  | -3.96254100 | -0.47546600 |
| C | -6.56677400  | -3.86814300 | 0.95849100  |
| C | -7.85957800  | -3.68306000 | 1.54905700  |
| C | -9.04234300  | -4.05186900 | 0.81749100  |
| C | -10.32548300 | -3.92367700 | 1.42958800  |
| C | -11.45528300 | -4.35147600 | 0.65786700  |
| C | -11.36979700 | -4.44339100 | -0.71866600 |
| C | -7.99271100  | -2.77369400 | 2.63921600  |
| C | -9.30316400  | -2.26814600 | 2.95138400  |
| C | -10.46147600 | -2.99390100 | 2.54050900  |

|   |              |             |             |
|---|--------------|-------------|-------------|
| C | -5.39839000  | -3.50807900 | 1.69532100  |
| C | -5.53256100  | -2.59202500 | 2.79723800  |
| C | -6.82874900  | -2.07914900 | 3.10532800  |
| C | -6.95661100  | -0.68662500 | 3.44853500  |
| C | -8.24062200  | -0.06573600 | 3.30503200  |
| C | -9.43083300  | -0.87371400 | 3.29351500  |
| C | -10.71240600 | -0.25025600 | 3.21385700  |
| C | -11.85499700 | -1.11524600 | 3.25082200  |
| C | -11.73266800 | -2.45244700 | 2.92288400  |
| C | -8.31100900  | 1.25134800  | 2.76304700  |
| C | -9.56871000  | 1.70836600  | 2.23483600  |
| C | -10.78417200 | 1.09472700  | 2.66339200  |
| C | -5.78196100  | 0.12365500  | 3.46886900  |
| C | -5.85365700  | 1.45210200  | 2.91944100  |
| C | -7.09499600  | 1.90591500  | 2.38030200  |
| C | -7.08314900  | 2.66649600  | 1.15738400  |
| C | -8.28903100  | 2.73403400  | 0.38552400  |
| C | -9.55749000  | 2.47179900  | 1.01206500  |
| C | -10.76263300 | 2.59815300  | 0.25762600  |
| C | -11.99128900 | 2.36398700  | 0.95804200  |
| C | -12.00180900 | 1.63130000  | 2.13014500  |
| C | -5.83012500  | 2.93534100  | 0.52891000  |
| C | -4.36672700  | -1.88475000 | 3.24753700  |
| C | -4.49441500  | -0.50032500 | 3.59171800  |
| C | -4.10483900  | -3.67443200 | 1.09474200  |
| C | -4.01643600  | -3.76775100 | -0.33185100 |
| C | -4.63417300  | 2.09333600  | 2.51862000  |
| C | -4.62193900  | 2.84357500  | 1.29836800  |
| C | -3.06426500  | -2.40140600 | 2.93955400  |
| C | -2.93014400  | -3.31891800 | 1.83718900  |
| C | -2.75667400  | -3.50243300 | -0.96403600 |
| C | -3.31460400  | 0.31392500  | 3.61531900  |
| C | -3.38719700  | 1.64219700  | 3.06543200  |
| C | -3.36323700  | 3.11051000  | 0.66770600  |
| C | -1.90584300  | -1.69521800 | 3.38580400  |
| C | -2.03414300  | -0.30685300 | 3.73365000  |

|   |             |             |             |
|---|-------------|-------------|-------------|
| C | -1.64407200 | -3.48771700 | 1.23914800  |
| C | -1.55586300 | -3.57976400 | -0.19447500 |
| C | -2.17533300 | 2.28042700  | 2.66205000  |
| C | -2.16358600 | 3.02321300  | 1.43402800  |
| C | -0.60277000 | -2.20213800 | 3.06852100  |
| C | -0.46960600 | -3.11361800 | 1.97393700  |
| C | -0.29855100 | -3.29394800 | -0.82056400 |
| C | -0.85309100 | 0.50588600  | 3.73595700  |
| C | -0.92409700 | 1.82259300  | 3.18827500  |
| C | -0.90529800 | 3.28464400  | 0.80360700  |
| C | 0.56134700  | -1.49889400 | 3.52300500  |
| C | 0.43414200  | -0.11044000 | 3.86774800  |
| C | 0.82097700  | -3.27495700 | 1.37448000  |
| C | 0.90723900  | -3.36825900 | -0.05367900 |
| C | 0.29130700  | 2.46951400  | 2.78920900  |
| C | 0.29904300  | 3.23178300  | 1.57438200  |
| C | 1.85799000  | -2.00649500 | 3.21104000  |
| C | 1.98939200  | -2.91563400 | 2.10889000  |
| C | 2.15855900  | -3.10247900 | -0.68278200 |
| C | 1.60831500  | 0.70373400  | 3.88572600  |
| C | 1.53551700  | 2.02930000  | 3.33149600  |
| C | 1.54897800  | 3.52236400  | 0.95129600  |
| C | 3.02192800  | -1.30071400 | 3.66203400  |
| C | 2.89551500  | 0.08359900  | 4.00371800  |
| C | 3.27705700  | -3.08189700 | 1.50590600  |
| C | 3.36367400  | -3.18134100 | 0.08414000  |
| C | 2.74917600  | 2.68130200  | 2.93391500  |
| C | 2.75599700  | 3.44398100  | 1.72106600  |
| C | 4.32462900  | -1.81570300 | 3.34806000  |
| C | 4.45477600  | -2.72942800 | 2.24526900  |
| C | 4.62368900  | -2.92837600 | -0.55026500 |
| C | 4.07621600  | 0.90074600  | 4.01913600  |
| C | 4.00125900  | 2.23076600  | 3.47364400  |
| C | 4.01576800  | 3.72295200  | 1.09015900  |
| C | 5.48414300  | -1.11259800 | 3.79350000  |
| C | 5.35662900  | 0.28020400  | 4.13625600  |

|   |              |             |             |
|---|--------------|-------------|-------------|
| C | 5.73755400   | -2.90880400 | 1.64862500  |
| C | 5.82443400   | -3.01364000 | 0.21465700  |
| C | 5.21082300   | 2.87661500  | 3.07612500  |
| C | 5.21825000   | 3.64096600  | 1.85535500  |
| C | 6.78408700   | -1.61785900 | 3.46468200  |
| C | 6.91270300   | -2.53204700 | 2.37699500  |
| C | 7.08163800   | -2.73360100 | -0.41286400 |
| C | 6.53768700   | 1.09178300  | 4.13218400  |
| C | 6.46335400   | 2.41082600  | 3.59529100  |
| C | 6.47810400   | 3.89597900  | 1.22072200  |
| C | 7.95861700   | -0.91913200 | 3.91413100  |
| C | 7.83169000   | 0.47515900  | 4.25757800  |
| C | 8.21189800   | -2.71364800 | 1.78582400  |
| C | 8.29869800   | -2.81704700 | 0.35023800  |
| C | 7.68701400   | 3.06073700  | 3.20787100  |
| C | 7.69450600   | 3.82523800  | 1.98594000  |
| C | 9.25252400   | -1.45629200 | 3.64139900  |
| C | 9.38415600   | -2.39216800 | 2.53452900  |
| C | 9.55500800   | -2.59295500 | -0.28910100 |
| C | 9.00316200   | 1.28833500  | 4.31723200  |
| C | 8.92734300   | 2.63542100  | 3.77222400  |
| C | 8.94230800   | 4.13939400  | 1.36817800  |
| C | 10.37536700  | -0.72867800 | 4.15573600  |
| C | 10.25387400  | 0.60844100  | 4.48511000  |
| C | 10.64473500  | -2.63959400 | 1.89869200  |
| C | 10.72778400  | -2.73697500 | 0.52227400  |
| C | 10.09963500  | 3.35804000  | 3.37437100  |
| C | 10.10684400  | 4.09126100  | 2.20264000  |
| C | 0.60933000   | 2.12221100  | -2.30269200 |
| C | 0.47447200   | 3.03622000  | -1.20891600 |
| H | -12.85136300 | -0.69249000 | 3.37621900  |
| H | -12.63582300 | -3.04904400 | 2.79810100  |
| H | -12.94048200 | 2.61942400  | 0.48796300  |
| H | -12.95894500 | 1.32834000  | 2.55359800  |
| H | -12.58310800 | 0.91429300  | -3.54504400 |
| H | -12.80717400 | 2.47253400  | -1.68606300 |



|   |              |             |             |
|---|--------------|-------------|-------------|
| H | -12.43121700 | -4.44748300 | 1.13276500  |
| H | -12.28060700 | -4.60961400 | -1.29312300 |
| H | -12.26673000 | -3.45143800 | -3.14349300 |
| H | -12.39036100 | -1.19913700 | -4.06306800 |
| H | 11.36785000  | -1.17785700 | 4.13539900  |
| H | 11.15372900  | 1.17781200  | 4.71581000  |
| H | 11.03892600  | 3.20153400  | 3.90393400  |
| H | 11.05169000  | 4.49370900  | 1.83865900  |
| H | 11.18547000  | 4.33741400  | -0.33504900 |
| H | 11.41099400  | 2.77259100  | -2.18793600 |
| H | 11.60370600  | 0.66068100  | -2.70502000 |
| H | 11.72629100  | -1.59410500 | -1.79265200 |
| H | 11.71149200  | -2.75880000 | 0.05422100  |
| H | 11.56498300  | -2.58711200 | 2.47971600  |

**(6,6)@Cycle-6**

|   |             |             |             |
|---|-------------|-------------|-------------|
| H | 12.58250700 | 2.43000000  | -3.42976200 |
| H | 12.61587800 | 4.00020400  | -1.57388300 |
| H | 12.65059600 | 4.38288100  | 0.53265600  |
| H | 12.68598800 | 3.55919000  | 2.82014500  |
| H | 12.70552000 | 1.91916900  | 4.19743200  |
| H | 12.70731300 | -0.47453900 | 4.62226900  |
| H | 12.56645000 | 0.41572000  | -4.15546500 |
| H | 12.56738200 | -1.97788400 | -3.72996000 |
| H | 12.58414400 | -3.61896200 | -2.35331400 |
| H | 12.61838400 | -4.44340200 | -0.06613400 |
| H | 12.65440000 | -4.06022700 | 2.04034600  |
| H | 12.68989200 | -2.48964900 | 3.89566000  |
| C | 11.63747400 | 2.72263600  | -2.97380600 |
| C | 11.65646800 | 3.61599200  | -1.91818400 |
| C | 11.70508400 | 4.14813100  | 1.02004600  |
| C | 11.72522700 | 3.67952000  | 2.32107200  |
| C | 11.75206200 | 1.39438600  | 4.24334000  |
| C | 11.75309500 | 0.03261000  | 4.48486200  |
| C | 11.61480200 | -0.08701400 | -3.98737000 |
| C | 11.61531900 | -1.44875900 | -3.74551900 |

|   |             |             |             |
|---|-------------|-------------|-------------|
| C | 11.63935700 | -3.73464400 | -1.82353000 |
| C | 11.65883100 | -4.20356500 | -0.52258700 |
| C | 11.70870100 | -3.67091200 | 2.41543800  |
| C | 11.72895900 | -2.77734100 | 3.47086600  |
| C | 10.43011200 | 2.05191400  | -3.34669700 |
| C | 10.46925400 | 3.89402800  | -1.16992000 |
| C | 10.49288300 | 4.15310100  | 0.26027400  |
| C | 10.53441600 | 3.18688100  | 2.94242800  |
| C | 10.54755400 | 2.07460200  | 3.87832100  |
| C | 10.54962700 | -0.73328200 | 4.37683600  |
| C | 10.41910200 | 0.68460400  | -3.84038000 |
| C | 10.42006900 | -2.12336700 | -3.34186700 |
| C | 10.43167800 | -3.23584000 | -2.40610300 |
| C | 10.47189100 | -4.20203300 | 0.27612500  |
| C | 10.49627400 | -3.94287400 | 1.70631900  |
| C | 10.53788800 | -2.10052100 | 3.88297800  |
| C | 9.20472100  | 2.61336700  | -2.87392200 |
| C | 9.22446700  | 3.54277200  | -1.77590200 |
| C | 9.27027000  | 4.04362300  | 0.99061300  |
| C | 9.29118600  | 3.55615500  | 2.34395900  |
| C | 9.31640400  | 1.40534700  | 4.15483100  |
| C | 9.31759900  | -0.01112800 | 4.40632800  |
| C | 9.18331200  | -0.03162400 | -3.82952400 |
| C | 9.18384700  | -1.44823800 | -3.57851300 |
| C | 9.20659800  | -3.59897800 | -1.76771700 |
| C | 9.22675700  | -4.08600700 | -0.41415700 |
| C | 9.27376700  | -3.58500600 | 2.35239400  |
| C | 9.29494200  | -2.65598600 | 3.45069500  |
| C | 7.94992700  | 2.02349900  | -3.25531600 |
| C | 7.98873800  | 3.84355500  | -1.10461000 |
| C | 8.01183100  | 4.09748800  | 0.29693400  |
| C | 8.05272300  | 3.14257300  | 2.94663500  |
| C | 8.06565100  | 2.05298100  | 3.86420600  |
| C | 8.06794100  | -0.72071900 | 4.35813700  |
| C | 7.93909700  | 0.68380100  | -3.73982400 |
| C | 7.94016600  | -2.09046500 | -3.24851900 |

|   |            |             |             |
|---|------------|-------------|-------------|
| C | 7.95147800 | -3.18001700 | -2.33075700 |
| C | 7.99095300 | -4.13235900 | 0.31997000  |
| C | 8.01507200 | -3.87850900 | 1.72159300  |
| C | 8.05648800 | -2.06036400 | 3.87378200  |
| C | 6.71906100 | 2.62435300  | -2.83647600 |
| C | 6.73873000 | 3.55282600  | -1.74023900 |
| C | 6.78457700 | 4.05529800  | 1.03435200  |
| C | 6.80539200 | 3.56785300  | 2.38547900  |
| C | 6.83079700 | 1.41107700  | 4.20226500  |
| C | 6.83228400 | -0.00299900 | 4.45472600  |
| C | 6.69759400 | -0.02823600 | -3.79688500 |
| C | 6.69819800 | -1.44315200 | -3.54746100 |
| C | 6.72072100 | -3.59908900 | -1.72979900 |
| C | 6.74063000 | -4.08363800 | -0.37736600 |
| C | 6.78821600 | -3.58109500 | 2.39797400  |
| C | 6.80966800 | -2.65530700 | 3.49624600  |
| C | 5.47715100 | 2.03967100  | -3.22862100 |
| C | 5.51612500 | 3.86606300  | -1.07273800 |
| C | 5.53904000 | 4.12224600  | 0.33996400  |
| C | 5.57978200 | 3.16265900  | 2.99565400  |
| C | 5.59295100 | 2.06455300  | 3.92049600  |
| C | 5.59588900 | -0.71560600 | 4.41931900  |
| C | 5.46604600 | 0.68953100  | -3.71873900 |
| C | 5.46740900 | -2.09288900 | -3.22901200 |
| C | 5.47859400 | -3.19043300 | -2.30291000 |
| C | 5.51759700 | -4.14025100 | 0.35715900  |
| C | 5.54225000 | -3.88497400 | 1.77038500  |
| C | 5.58455100 | -2.06599600 | 3.93167400  |
| C | 4.24531400 | 2.63315900  | -2.79387000 |
| C | 4.26454600 | 3.55938400  | -1.70318200 |
| C | 4.30981900 | 4.06448100  | 1.07869200  |
| C | 4.33045700 | 3.57671300  | 2.42373000  |
| C | 4.35626100 | 1.41363400  | 4.24578500  |
| C | 4.35810500 | 0.00565400  | 4.50015500  |
| C | 4.22331200 | -0.02707000 | -3.76156900 |
| C | 4.22382200 | -1.43711400 | -3.51618400 |

|   |            |             |             |
|---|------------|-------------|-------------|
| C | 4.24585200 | -3.59659600 | -1.69082500 |
| C | 4.26576200 | -4.07369100 | -0.34144700 |
| C | 4.31435300 | -3.57356800 | 2.44445300  |
| C | 4.33573300 | -2.65428400 | 3.54101000  |
| C | 2.99887100 | 2.04476700  | -3.18687800 |
| C | 3.03734400 | 3.87538600  | -1.03247100 |
| C | 3.05958700 | 4.13479700  | 0.38108800  |
| C | 3.10000900 | 3.17013400  | 3.03739600  |
| C | 3.11350100 | 2.07041600  | 3.96329700  |
| C | 3.11730400 | -0.71160300 | 4.46976200  |
| C | 2.98703100 | 0.69377500  | -3.68033600 |
| C | 2.98826700 | -2.09187500 | -3.19959800 |
| C | 2.99972400 | -3.18870200 | -2.27039300 |
| C | 3.03883500 | -4.12510600 | 0.39775400  |
| C | 3.06364500 | -3.87726000 | 1.81384800  |
| C | 3.10613600 | -2.06410600 | 3.98301500  |
| C | 1.77506200 | 2.63249000  | -2.74829900 |
| C | 1.79344300 | 3.56343600  | -1.65831200 |
| C | 1.83563300 | 4.07370500  | 1.11590900  |
| C | 1.85682100 | 3.58279300  | 2.46581100  |
| C | 1.88341900 | 1.41990400  | 4.28816500  |
| C | 1.88529700 | 0.00748800  | 4.54837700  |
| C | 1.75074000 | -0.02010200 | -3.71428600 |
| C | 1.75031700 | -1.43584500 | -3.48053800 |
| C | 1.77320500 | -3.58342300 | -1.65373800 |
| C | 1.79446700 | -4.04608000 | -0.29683700 |
| C | 1.84226700 | -3.56378400 | 2.48465900  |
| C | 1.86305100 | -2.64932100 | 3.59112500  |
| C | 0.52874400 | 2.03848100  | -3.12787600 |
| C | 0.56484300 | 3.86686100  | -0.98790500 |
| C | 0.58572600 | 4.12005400  | 0.41559400  |
| C | 0.62663000 | 3.16005400  | 3.06711700  |
| C | 0.64034700 | 2.06646800  | 3.98674800  |
| C | 0.64378200 | -0.70817700 | 4.50069000  |
| C | 0.51579600 | 0.69714400  | -3.60677100 |
| C | 0.51415800 | -2.07804100 | -3.14417600 |

|   |             |             |             |
|---|-------------|-------------|-------------|
| C | 0.52637100  | -3.15968100 | -2.21530300 |
| C | 0.56930600  | -4.07664900 | 0.44003100  |
| C | 0.59228100  | -3.83914800 | 1.84198500  |
| C | 0.63156100  | -2.05045900 | 4.01404900  |
| C | -0.70061400 | 2.63875200  | -2.71020400 |
| C | -0.68195300 | 3.56573200  | -1.62274400 |
| C | -0.64382100 | 4.04822100  | 1.14604000  |
| C | -0.62245900 | 3.56207000  | 2.49058400  |
| C | -0.59421200 | 1.41406000  | 4.30494600  |
| C | -0.59302100 | 0.00918600  | 4.56811700  |
| C | -0.72618000 | -0.01128300 | -3.64763100 |
| C | -0.72726100 | -1.41984200 | -3.41749200 |
| C | -0.70280500 | -3.55376100 | -1.59633700 |
| C | -0.68062100 | -4.03030900 | -0.25293900 |
| C | -0.63745700 | -3.54060800 | 2.51135200  |
| C | -0.61745700 | -2.62758800 | 3.61072700  |
| C | -1.94077200 | 2.05805800  | -3.10816200 |
| C | -1.90730900 | 3.86853100  | -0.96079500 |
| C | -1.88648900 | 4.09360500  | 0.44928200  |
| C | -1.84598700 | 3.14937200  | 3.09637500  |
| C | -1.83317900 | 2.06287800  | 4.02559800  |
| C | -1.83200800 | -0.69820000 | 4.52773000  |
| C | -1.95284600 | 0.70691600  | -3.57351200 |
| C | -1.95694200 | -2.06166000 | -3.08995500 |
| C | -1.94491400 | -3.14814600 | -2.16287900 |
| C | -1.90168600 | -4.10461200 | 0.47802100  |
| C | -1.88003100 | -3.84771300 | 1.88389300  |
| C | -1.84434300 | -2.04026700 | 4.03630200  |
| C | -3.17187000 | 2.65930400  | -2.69445100 |
| C | -3.15394000 | 3.57431900  | -1.59987500 |
| C | -3.11282100 | 4.01917000  | 1.17841200  |
| C | -3.09380100 | 3.54772900  | 2.52114800  |
| C | -3.06845200 | 1.42386900  | 4.36537900  |
| C | -3.06865800 | 0.01940000  | 4.61484200  |
| C | -3.19476400 | -0.00268000 | -3.62094200 |
| C | -3.19639000 | -1.40679500 | -3.37416200 |

|   |             |             |             |
|---|-------------|-------------|-------------|
| C | -3.17172300 | -3.55925000 | -1.55543600 |
| C | -3.15101800 | -4.04937000 | -0.21773200 |
| C | -3.10889600 | -3.54485400 | 2.55098100  |
| C | -3.09083200 | -2.62176200 | 3.63781500  |
| C | -4.42015600 | 2.07550300  | -3.09489900 |
| C | -4.38359500 | 3.87733100  | -0.93047000 |
| C | -4.36223800 | 4.09759000  | 0.48402700  |
| C | -4.32534000 | 3.16334700  | 3.14644600  |
| C | -4.31322900 | 2.08032500  | 4.08601700  |
| C | -4.31182100 | -0.69599600 | 4.58249700  |
| C | -4.43099000 | 0.71963600  | -3.56674100 |
| C | -4.43290600 | -2.06014800 | -3.05876300 |
| C | -4.42020200 | -3.15394800 | -2.13191300 |
| C | -4.38033800 | -4.12420900 | 0.51617300  |
| C | -4.35888200 | -3.86658700 | 1.92759700  |
| C | -4.32248200 | -2.04173100 | 4.08533300  |
| C | -5.64736400 | 2.66688100  | -2.66768900 |
| C | -5.62834400 | 3.58756500  | -1.56450600 |
| C | -5.58299200 | 4.05490800  | 1.21859500  |
| C | -5.56514100 | 3.57587500  | 2.57369800  |
| C | -5.54437100 | 1.43535600  | 4.41226900  |
| C | -5.54339600 | 0.02064200  | 4.66505400  |
| C | -5.66769700 | 0.00670900  | -3.60859600 |
| C | -5.66862700 | -1.40761600 | -3.34884500 |
| C | -5.64477500 | -3.56713100 | -1.52953400 |
| C | -5.62481600 | -4.06083800 | -0.17938700 |
| C | -5.58112400 | -3.55832400 | 2.59703700  |
| C | -5.56273000 | -2.63031800 | 3.69441800  |
| C | -6.89324300 | 2.06811100  | -3.04304200 |
| C | -6.85420000 | 3.87853000  | -0.88418300 |
| C | -6.83152300 | 4.11760100  | 0.52109400  |
| C | -6.79594700 | 3.16352500  | 3.17718300  |
| C | -6.78549400 | 2.08073500  | 4.10420200  |
| C | -6.78402000 | -0.69260200 | 4.60365500  |
| C | -6.90380600 | 0.72476700  | -3.51969500 |
| C | -6.90304000 | -2.04985900 | -3.01066900 |

|   |              |             |             |
|---|--------------|-------------|-------------|
| C | -6.89078300  | -3.14023300 | -2.09240800 |
| C | -6.85198900  | -4.10226200 | 0.55729700  |
| C | -6.83011500  | -3.84975800 | 1.95996200  |
| C | -6.79369700  | -2.03162000 | 4.11532800  |
| C | -8.13242000  | 2.66203900  | -2.61820400 |
| C | -8.11261400  | 3.58773200  | -1.51658300 |
| C | -8.06736800  | 4.07011500  | 1.25523200  |
| C | -8.04936300  | 3.58138800  | 2.60899600  |
| C | -8.02969600  | 1.43878400  | 4.43254500  |
| C | -8.02880900  | 0.02286700  | 4.68870200  |
| C | -8.15332400  | 0.01335500  | -3.56367300 |
| C | -8.15307300  | -1.40232000 | -3.30439300 |
| C | -8.12976100  | -3.55360600 | -1.49062500 |
| C | -8.10982500  | -4.04417200 | -0.13784600 |
| C | -8.06612100  | -3.54884500 | 2.63054800  |
| C | -8.04769500  | -2.62154000 | 3.73072400  |
| C | -9.37485700  | 2.10440900  | -3.04902100 |
| C | -9.33520100  | 3.94023000  | -0.86782200 |
| C | -9.31171800  | 4.19123800  | 0.56447200  |
| C | -9.27545700  | 3.22077600  | 3.24699000  |
| C | -9.26546300  | 2.11201800  | 4.18784300  |
| C | -9.26423600  | -0.69386400 | 4.69659700  |
| C | -9.38570200  | 0.73525300  | -3.53868800 |
| C | -9.38446200  | -2.07093700 | -3.02704700 |
| C | -9.37231800  | -3.18252200 | -2.08950900 |
| C | -9.33297600  | -4.15383200 | 0.59136700  |
| C | -9.31038800  | -3.89862600 | 2.02261200  |
| C | -9.27381100  | -2.06155400 | 4.20331500  |
| C | -10.56658600 | 2.77916600  | -2.63573600 |
| C | -10.54731900 | 3.66994800  | -1.57780700 |
| C | -10.49911600 | 4.19074700  | 1.36206800  |
| C | -10.48178400 | 3.71993900  | 2.66262500  |
| C | -10.46139600 | 1.43835300  | 4.59042400  |
| C | -10.46070100 | 0.07752400  | 4.83767500  |
| C | -10.58891700 | -0.03124800 | -3.64375500 |
| C | -10.58831800 | -1.39201800 | -3.39573800 |

|   |              |             |             |
|---|--------------|-------------|-------------|
| C | -10.56377300 | -3.67428900 | -1.46912000 |
| C | -10.54468900 | -4.14534400 | -0.16884200 |
| C | -10.49801500 | -3.62316100 | 2.77076600  |
| C | -10.48039200 | -2.73232900 | 3.82867000  |
| H | -11.52742100 | 2.49057000  | -3.06017700 |
| H | -11.49361800 | 4.05628100  | -1.20111600 |
| H | -11.45816400 | 4.43203000  | 0.90528900  |
| H | -11.42744000 | 3.60466300  | 3.19089800  |
| H | -11.41385500 | 1.96653200  | 4.56947700  |
| H | -11.41261200 | -0.42519100 | 5.00410800  |
| H | -11.54313600 | 0.47528200  | -3.78352000 |
| H | -11.54208000 | -1.91614000 | -3.34814400 |
| H | -11.52440800 | -3.55159200 | -1.96788800 |
| H | -11.49081500 | -4.37930500 | 0.31772600  |
| H | -11.45698900 | -4.00729800 | 2.42516700  |
| H | -11.42588400 | -2.44147400 | 4.28476700  |
| C | 0.19592800   | 0.31213000  | -6.69294800 |
| C | -2.09318000  | 1.08419000  | -6.68010900 |
| C | -0.23688700  | -1.02099600 | -6.67989300 |
| H | 1.26617300   | 0.52265700  | -6.65667700 |
| C | -2.52639700  | -0.24873600 | -6.66206900 |
| H | -2.81893900  | 1.89386300  | -6.62617200 |
| H | 0.48873700   | -1.83140500 | -6.63174500 |
| H | -3.59631800  | -0.45808200 | -6.60680800 |
| C | -1.71540600  | -7.24439200 | -0.70105400 |
| C | -3.71536100  | -8.25616400 | -1.82143400 |
| C | -2.67461800  | -7.35474100 | -1.82567600 |
| C | -2.34463600  | -6.48316200 | -2.97518700 |
| C | -3.32070500  | -5.82891900 | -3.74734000 |
| C | -0.64709800  | -5.27049100 | -4.25507100 |
| C | -2.99548100  | -4.92306900 | -4.76329500 |
| H | -4.37370400  | -5.96462700 | -3.50816100 |
| H | 0.38273600   | -4.95396800 | -4.40266300 |
| H | -3.80189400  | -4.44651000 | -5.31435900 |
| C | -1.60990100  | -1.31554100 | -6.61631400 |
| C | -1.64589600  | -4.59328300 | -4.98364300 |



|   |             |              |             |
|---|-------------|--------------|-------------|
| C | -2.16453000 | -2.72133600  | -6.44304900 |
| H | -2.46982300 | -3.16172800  | -7.40990300 |
| H | -3.06096100 | -2.63351900  | -5.81235900 |
| O | -1.19963400 | -3.59766500  | -5.82619800 |
| C | -0.96782200 | -6.22276600  | -3.26817200 |
| C | 0.05503600  | -6.92747600  | -2.45022400 |
| C | 1.21832700  | -7.42707000  | -2.99818800 |
| S | 1.66981600  | -7.26636800  | -4.73235900 |
| S | 2.40654800  | -8.43098300  | -2.09594800 |
| C | 3.01250500  | -8.40165700  | -4.68958700 |
| H | 3.52119400  | -8.60718900  | -5.62931000 |
| C | 3.34720800  | -8.92847000  | -3.49626900 |
| H | 4.16697200  | -9.62320100  | -3.32503700 |
| S | -4.78962500 | -8.56221300  | -3.23162900 |
| C | -5.20827900 | -10.38773400 | -1.33519700 |
| H | -5.60902500 | -11.25433100 | -0.81305900 |
| S | -4.07519400 | -9.36890300  | -0.45438000 |
| C | -5.53284800 | -10.02347300 | -2.59055700 |
| H | -6.23452400 | -10.55009000 | -3.23428400 |
| C | -1.19071900 | -7.08827400  | 1.69499100  |
| C | -0.32740400 | -7.10733900  | -1.02587000 |
| C | 0.58563700  | -7.05727300  | 0.04504700  |
| H | 1.64323700  | -6.90230200  | -0.15550200 |
| C | 0.18101200  | -7.07249800  | 1.38716400  |
| H | 0.93027000  | -6.99171600  | 2.17163800  |
| C | -2.12352800 | -7.20358900  | 0.64236300  |
| H | -3.18124900 | -7.16827200  | 0.89646400  |
| O | -1.72224500 | -6.95447700  | 2.95066700  |
| C | -1.79797900 | -5.77043600  | 5.04893100  |
| H | -2.42839400 | -6.50987700  | 5.56717600  |
| H | -2.47510600 | -5.12966100  | 4.46923200  |
| C | -1.04425400 | -4.88395200  | 6.07076900  |
| H | -0.28460700 | -4.29319900  | 5.53589900  |
| H | -0.49951100 | -5.50538000  | 6.80138400  |
| C | -2.00216400 | -3.91108700  | 6.79978100  |
| H | -2.63865200 | -4.47274400  | 7.50490700  |

|   |             |             |             |
|---|-------------|-------------|-------------|
| H | -2.68743800 | -3.48283000 | 6.05428900  |
| C | -1.31728600 | -2.74536000 | 7.55111400  |
| H | -0.51907500 | -2.31386900 | 6.92529500  |
| H | -0.83066300 | -3.12066200 | 8.46709000  |
| C | -0.88456900 | -6.47740000 | 4.03642100  |
| H | -0.34338900 | -7.33039800 | 4.48146400  |
| H | -0.14394800 | -5.76458100 | 3.64558200  |
| C | -2.33313600 | -1.61968900 | 7.90920800  |
| C | -1.88836500 | -0.66520700 | 8.99592800  |
| C | -1.50649700 | 0.62405300  | 8.89030700  |
| O | -1.23736000 | 7.03330500  | 2.99064200  |
| C | -1.69020100 | 7.13475100  | 1.70016100  |
| C | -2.39601400 | 7.06288800  | -1.06365900 |
| C | -0.69898100 | 7.22733300  | 0.70095900  |
| H | 0.34214300  | 7.21080800  | 1.01715500  |
| C | -3.04067700 | 7.09524200  | 1.31465500  |
| H | -3.83382000 | 7.02688600  | 2.05591000  |
| C | -3.36752500 | 7.02264900  | -0.04630700 |
| H | -4.40931000 | 6.84403400  | -0.30185100 |
| C | -1.02880100 | 7.23142200  | -0.66507400 |
| C | -0.01431600 | 7.36699000  | -1.73747100 |
| C | -2.69871900 | 6.87657200  | -2.50411900 |
| C | -1.61844800 | 6.20299600  | -3.26990000 |
| C | -0.26512900 | 6.50513100  | -2.91387800 |
| C | -1.86610000 | 5.25155900  | -4.27654600 |
| H | -2.87714300 | 4.90089800  | -4.46981800 |
| C | 0.76355200  | 5.89467600  | -3.65254100 |
| H | 1.80045300  | 6.05718400  | -3.36536000 |
| C | 0.51117100  | 5.00097200  | -4.69975500 |
| H | 1.35399600  | 4.55817200  | -5.22402200 |
| C | -0.81470900 | 4.63140300  | -4.98205200 |
| O | -1.19212800 | 3.64068400  | -5.86079400 |
| C | -0.72212000 | 1.37987700  | -6.64462300 |
| C | -0.18758700 | 2.79251800  | -6.45509800 |
| C | -3.83830800 | 7.35675300  | -3.11599400 |
| C | 1.00423700  | 8.29343300  | -1.67345500 |

|   |             |             |             |
|---|-------------|-------------|-------------|
| S | -4.17933200 | 7.20326800  | -4.87668900 |
| S | -5.09918100 | 8.33095000  | -2.28220900 |
| S | 1.27176000  | 9.40345500  | -0.28311200 |
| S | 2.13596300  | 8.64035500  | -3.02829300 |
| C | -5.94692000 | 8.84086000  | -3.73687300 |
| H | -6.78098800 | 9.52858300  | -3.61279500 |
| C | -5.52927100 | 8.33040900  | -4.91096000 |
| H | -5.97537500 | 8.54393600  | -5.88027300 |
| C | 2.80803300  | 10.11591300 | -2.34381500 |
| H | 3.52498900  | 10.66568900 | -2.95025600 |
| C | 2.41560300  | 10.46062400 | -1.10250300 |
| H | 2.76816600  | 11.33259400 | -0.55516700 |
| H | 0.13381700  | 3.24510100  | -7.41093400 |
| H | 0.69326400  | 2.72096400  | -5.80043200 |
| H | -1.90071300 | -1.09359700 | 10.00467500 |
| H | -2.58653000 | -1.07359600 | 6.99176700  |
| H | -3.26604400 | -2.10411800 | 8.25075400  |
| C | -1.29836000 | 1.44466800  | 7.64039500  |
| H | -0.21549300 | 1.65907700  | 7.56739000  |
| H | -1.25418900 | 1.14536600  | 9.82137600  |
| C | -2.06104300 | 2.80506400  | 7.57129300  |
| H | -3.04777700 | 2.62943400  | 7.11332700  |
| H | -2.25421300 | 3.18227300  | 8.58912800  |
| C | -1.28345700 | 3.87555600  | 6.75617800  |
| H | -0.65750100 | 3.36743300  | 6.01014600  |
| H | -0.58203100 | 4.40446400  | 7.42363400  |
| C | -2.15778300 | 4.89894200  | 6.00035900  |
| H | -2.88058000 | 4.34168400  | 5.38243400  |
| H | -2.75089300 | 5.50242300  | 6.70813500  |
| C | -1.30798900 | 5.81297400  | 5.08283100  |
| H | -0.56805200 | 5.19250200  | 4.55879800  |
| H | -1.54934200 | 0.85195500  | 6.75527900  |
| C | -2.13972800 | 6.52469400  | 4.00705800  |
| H | -2.83395600 | 5.80397400  | 3.55234100  |
| H | -2.73199300 | 7.35855700  | 4.42233800  |
| H | -0.74425400 | 6.54705000  | 5.67933600  |

**(7,7)@Cycle-6**

|   |             |             |             |
|---|-------------|-------------|-------------|
| C | -1.85997400 | -0.45465000 | -7.07885900 |
| C | 0.47703100  | -0.94056900 | -7.08591300 |
| C | -1.59673600 | 0.93541800  | -7.07560300 |
| H | -2.90403200 | -0.76969800 | -7.03783500 |
| C | 0.73946900  | 0.44865000  | -7.09058200 |
| H | 1.32005900  | -1.63042100 | -7.05413600 |
| H | -2.43965600 | 1.62514500  | -7.03519300 |
| H | 1.78389400  | 0.76373900  | -7.05861100 |
| C | 0.09764100  | 7.60019300  | -0.93503800 |
| C | 2.16038900  | 8.40034600  | -2.11447900 |
| C | 1.03858700  | 7.59347000  | -2.10017100 |
| C | 0.61606300  | 6.76970500  | -3.27781500 |
| C | 1.51781700  | 6.12329500  | -4.15223500 |
| C | -1.16412500 | 5.61146200  | -4.52375000 |
| C | 1.12646300  | 5.22391100  | -5.16209400 |
| H | 2.58769000  | 6.21885000  | -3.98340000 |
| H | -2.20848100 | 5.32053400  | -4.60980300 |
| H | 1.90546400  | 4.73475900  | -5.74319200 |
| C | -0.27922100 | 1.43061300  | -6.99276400 |
| C | -0.22897800 | 4.87683400  | -5.30652700 |
| C | 0.16710300  | 2.92299000  | -6.82193900 |
| H | 0.31089800  | 3.37977100  | -7.81619100 |
| H | 1.14186300  | 2.88756700  | -6.31732100 |
| O | -0.73273500 | 3.81464900  | -6.07168200 |
| C | -0.77932600 | 6.55549800  | -3.52748800 |
| C | -1.73626200 | 7.31636600  | -2.66146400 |
| C | -2.90496600 | 7.84556600  | -3.17929100 |
| S | -3.45389800 | 7.61414500  | -4.87704200 |
| S | -3.99466500 | 8.96595900  | -2.28765200 |
| C | -4.73603400 | 8.81572900  | -4.83963600 |
| H | -5.28194900 | 8.99044500  | -5.76458000 |
| C | -4.98223900 | 9.42790600  | -3.66578700 |
| H | -5.75786200 | 10.17187000 | -3.49563300 |
| S | 3.22871200  | 8.63686800  | -3.54282200 |

|   |             |             |             |
|---|-------------|-------------|-------------|
| C | 3.87222600  | 10.36850500 | -1.62600800 |
| H | 4.37026400  | 11.17701600 | -1.09457100 |
| S | 2.65502500  | 9.45668000  | -0.74412200 |
| C | 4.13363400  | 9.99795100  | -2.89381900 |
| H | 4.87463200  | 10.45896900 | -3.54371700 |
| C | -0.40707100 | 7.55930300  | 1.51461000  |
| C | -1.29823200 | 7.55699000  | -1.24678700 |
| C | -2.18862200 | 7.63721000  | -0.14977400 |
| H | -3.25910000 | 7.56278800  | -0.32271600 |
| C | -1.77473900 | 7.66546100  | 1.19207300  |
| H | -2.53080000 | 7.65489100  | 1.97443500  |
| C | 0.51088800  | 7.58541800  | 0.42800200  |
| H | 1.56613100  | 7.47516200  | 0.66619300  |
| O | 0.10296000  | 7.34584100  | 2.79285400  |
| C | -0.00618400 | 6.30973000  | 5.11097700  |
| H | 0.50232400  | 7.10378900  | 5.67919300  |
| H | 0.78709300  | 5.69311500  | 4.67733900  |
| C | -0.86343500 | 5.41991800  | 6.12837700  |
| H | -1.66707500 | 4.91057600  | 5.58028000  |
| H | -1.36332600 | 6.09174900  | 6.84557000  |
| C | -0.02604500 | 4.33265600  | 6.92530600  |
| H | 0.71839500  | 4.86744800  | 7.53751400  |
| H | 0.55733100  | 3.77390600  | 6.18919300  |
| C | -0.78061200 | 3.27973000  | 7.88692000  |
| H | -1.86845300 | 3.36043400  | 7.73190800  |
| H | -0.59502700 | 3.57957200  | 8.93069500  |
| C | -0.79702700 | 6.97247000  | 3.91583700  |
| H | -1.31212900 | 7.88650900  | 4.25370200  |
| H | -1.55173000 | 6.27891300  | 3.53453800  |
| C | -0.36786500 | 1.74716600  | 7.67986400  |
| C | -0.24833400 | 0.69752200  | 8.80149500  |
| C | -0.43320700 | -0.66190600 | 8.85653600  |
| O | -1.14917700 | -7.31913300 | 2.80613100  |
| C | -0.63310300 | -7.53918400 | 1.53210100  |
| C | 0.25685000  | -7.54058400 | -1.23128500 |
| C | -1.55036300 | -7.56894500 | 0.44607600  |

|   |             |              |             |
|---|-------------|--------------|-------------|
| H | -2.60564600 | -7.45611400  | 0.68382900  |
| C | 0.73459300  | -7.65044600  | 1.20910000  |
| H | 1.49058200  | -7.63819700  | 1.99165700  |
| C | 1.14826200  | -7.62542000  | -0.13398300 |
| H | 2.21869700  | -7.55015300  | -0.30590300 |
| C | -1.13850600 | -7.58733100  | -0.91579800 |
| C | -2.08522600 | -7.58644700  | -2.07418800 |
| C | 0.68662600  | -7.29596400  | -2.64893800 |
| C | -0.28136700 | -6.54447800  | -3.51369900 |
| C | -1.67439600 | -6.76189000  | -3.25299900 |
| C | 0.08893800  | -5.60428800  | -4.52019900 |
| H | 1.13123400  | -5.31264700  | -4.62330000 |
| C | -2.58793200 | -6.12125000  | -4.11956000 |
| H | -3.65544200 | -6.22047500  | -3.93811800 |
| C | -2.21039700 | -5.22543700  | -5.13688000 |
| H | -2.99668800 | -4.74032400  | -5.71139600 |
| C | -0.85741400 | -4.87485900  | -5.29538600 |
| O | -0.36675400 | -3.81244000  | -6.06700600 |
| C | -0.83995400 | -1.43558200  | -6.99061700 |
| C | -1.27735400 | -2.92933800  | -6.81610600 |
| C | 1.86089000  | -7.81157000  | -3.16991400 |
| C | -3.20133600 | -8.40205400  | -2.08192900 |
| S | 2.40100800  | -7.57786700  | -4.86974600 |
| S | 2.96896000  | -8.91406000  | -2.27945900 |
| S | -3.67783900 | -9.46389900  | -0.70975900 |
| S | -4.27476800 | -8.64788200  | -3.50441100 |
| C | 3.96479200  | -9.35899900  | -3.65668600 |
| H | 4.75487400  | -10.08730300 | -3.48538500 |
| C | 3.70620600  | -8.75377200  | -4.83146800 |
| H | 4.25490400  | -8.91894900  | -5.75649400 |
| C | -5.16117600 | -10.01954600 | -2.85238300 |
| H | -5.90034100 | -10.48806900 | -3.49899300 |
| C | -4.88926700 | -10.38835400 | -1.58620300 |
| H | -5.37566700 | -11.20272800 | -1.05294100 |
| H | -1.42060700 | -3.39064600  | -7.80820400 |
| H | -2.25021900 | -2.89917500  | -6.30777400 |

|   |             |             |             |
|---|-------------|-------------|-------------|
| H | 0.23986300  | 1.09584400  | 9.70072500  |
| H | -1.04292800 | 1.34427600  | 6.93371700  |
| H | 0.63974400  | 1.76636600  | 7.23532700  |
| C | -1.13090400 | -1.77222800 | 8.02526200  |
| H | -1.95785600 | -2.13128100 | 8.66635700  |
| H | -0.06784500 | -1.08535300 | 9.80149000  |
| C | -0.27675300 | -3.06731800 | 7.63536900  |
| H | 0.55132100  | -2.75636400 | 6.98730000  |
| H | 0.18891800  | -3.45542900 | 8.55701600  |
| C | -1.08271400 | -4.25338500 | 6.93536100  |
| H | -1.81539300 | -3.81817700 | 6.24892600  |
| H | -1.67472500 | -4.76876500 | 7.71005500  |
| C | -0.24840700 | -5.34796200 | 6.12955100  |
| H | 0.54706800  | -4.83702900 | 5.57359000  |
| H | 0.26618000  | -6.00336900 | 6.85113200  |
| C | -1.08070100 | -6.26828200 | 5.11738800  |
| H | -1.89213700 | -5.68102100 | 4.67681300  |
| H | -1.61005700 | -1.36044800 | 7.13589400  |
| C | -0.26322100 | -6.91191800 | 3.92755100  |
| H | 0.46988300  | -6.19778300 | 3.54135400  |
| H | 0.28049100  | -7.80650700 | 4.27267600  |
| H | -1.56461800 | -7.07702700 | 5.68621500  |
| H | 12.31203300 | 4.80921000  | -0.86217400 |
| H | 12.33461200 | 4.80119900  | 1.56503700  |
| H | 12.33619100 | 3.86956700  | 3.46453400  |
| H | 12.32125700 | 1.95556200  | 4.95722400  |
| H | 12.29722100 | -0.10738000 | 5.40785700  |
| H | 12.26171700 | -2.47175900 | 4.86199100  |
| H | 12.22868300 | -4.12662500 | 3.54732400  |
| H | 12.19482500 | -5.18528400 | 1.36337700  |
| H | 12.27924000 | 3.89010000  | -2.76615200 |
| H | 12.23790100 | 1.98795200  | -4.27299900 |
| H | 12.20576600 | -0.06979200 | -4.74485300 |
| H | 12.17926800 | -2.44048100 | -4.22704200 |
| H | 12.16924400 | -4.10931100 | -2.92952000 |
| H | 12.17532200 | -5.18175400 | -0.75201700 |

|   |             |             |             |
|---|-------------|-------------|-------------|
| C | 11.36232400 | 4.75586600  | -0.33168500 |
| C | 11.37528100 | 4.75131500  | 1.05181600  |
| C | 11.37864400 | 3.42917500  | 3.73907700  |
| C | 11.37010000 | 2.33794000  | 4.58952200  |
| C | 11.33576000 | -0.58768700 | 5.23177000  |
| C | 11.31550700 | -1.93567200 | 4.92067200  |
| C | 11.26851100 | -4.28091900 | 3.05700200  |
| C | 11.24913900 | -4.88471300 | 1.81231000  |
| C | 11.31684700 | 3.45204400  | -3.02714100 |
| C | 11.29325400 | 2.36730200  | -3.88581700 |
| C | 11.24730300 | -0.55211200 | -4.55807000 |
| C | 11.23217000 | -1.90392000 | -4.26312800 |
| C | 11.21810400 | -4.26712700 | -2.42292900 |
| C | 11.22160500 | -4.87865500 | -1.18184400 |
| C | 10.15338500 | 4.53305100  | -1.05959200 |
| C | 10.17990700 | 4.52365000  | 1.80024700  |
| C | 10.18145000 | 3.87976100  | 3.10321000  |
| C | 10.16388700 | 1.62231100  | 4.86112200  |
| C | 10.14730200 | 0.20269700  | 5.17262600  |
| C | 10.10522800 | -2.58598900 | 4.52979200  |
| C | 10.08240100 | -3.72447700 | 3.62641000  |
| C | 10.04242800 | -4.97299600 | 1.05266800  |
| C | 10.13130600 | 3.89772000  | -2.36672800 |
| C | 10.08266000 | 1.65392300  | -4.14221900 |
| C | 10.06039000 | 0.23747200  | -4.46860000 |
| C | 10.02891100 | -2.55877700 | -3.85869700 |
| C | 10.02192800 | -3.70651300 | -2.96660500 |
| C | 10.02899200 | -4.97039700 | -0.40079700 |
| C | 8.92708400  | 4.65587300  | -0.33673000 |
| C | 8.94058300  | 4.65120600  | 1.10066300  |
| C | 8.94388200  | 3.39792800  | 3.63037600  |
| C | 8.93501900  | 2.26253600  | 4.51198900  |
| C | 8.90266300  | -0.49707500 | 5.11866800  |
| C | 8.88169100  | -1.89801100 | 4.79686800  |
| C | 8.83722900  | -4.11121100 | 3.04186700  |
| C | 8.81696500  | -4.73923200 | 1.74893800  |



|   |            |             |             |
|---|------------|-------------|-------------|
| C | 8.88432000 | 3.41903100  | -2.87449200 |
| C | 8.86014500 | 2.29062600  | -3.76503900 |
| C | 8.81669400 | -0.46297200 | -4.40080400 |
| C | 8.80083600 | -1.86784400 | -4.09550700 |
| C | 8.78747400 | -4.09855800 | -2.36332700 |
| C | 8.79091400 | -4.73413700 | -1.07399200 |
| C | 7.67094300 | 4.50605400  | -1.01985500 |
| C | 7.69749300 | 4.49739100  | 1.80604900  |
| C | 7.69918800 | 3.86227800  | 3.08094900  |
| C | 7.68148000 | 1.62633900  | 4.81346600  |
| C | 7.66533100 | 0.23516600  | 5.11948800  |
| C | 7.62399700 | -2.52259200 | 4.48880800  |
| C | 7.60149400 | -3.63911600 | 3.60454000  |
| C | 7.56171600 | -4.87358800 | 1.06055500  |
| C | 7.64943700 | 3.87916400  | -2.29912100 |
| C | 7.60160400 | 1.65735300  | -4.05086400 |
| C | 7.57970400 | 0.26916300  | -4.37204600 |
| C | 7.54858800 | -2.49630100 | -3.77226700 |
| C | 7.54136500 | -3.62277600 | -2.89995000 |
| C | 7.54820800 | -4.87180100 | -0.36395300 |
| C | 6.44217300 | 4.70348900  | -0.31246700 |
| C | 6.45566900 | 4.70025700  | 1.12307800  |
| C | 6.45865600 | 3.43548400  | 3.65325700  |
| C | 6.44963400 | 2.29858200  | 4.52974500  |
| C | 6.41755300 | -0.46614400 | 5.14020000  |
| C | 6.39675100 | -1.86596800 | 4.82270700  |
| C | 6.35208100 | -4.08437800 | 3.06600000  |
| C | 6.33173000 | -4.71093900 | 1.77421300  |
| C | 6.39900500 | 3.45601000  | -2.85190000 |
| C | 6.37550600 | 2.32720600  | -3.73946200 |
| C | 6.33192900 | -0.43211300 | -4.37917000 |
| C | 6.31583800 | -1.83599400 | -4.07620800 |
| C | 6.30193300 | -4.07393300 | -2.34362400 |
| C | 6.30512800 | -4.70813900 | -1.05524300 |
| C | 5.19745900 | 4.56714800  | -0.99932900 |
| C | 5.22478100 | 4.56414700  | 1.83408200  |

|   |            |             |             |
|---|------------|-------------|-------------|
| C | 5.22670100 | 3.91736100  | 3.11491700  |
| C | 5.20836600 | 1.66731700  | 4.84500400  |
| C | 5.19212900 | 0.26650000  | 5.15609700  |
| C | 5.15114900 | -2.50101500 | 4.53219100  |
| C | 5.12874200 | -3.62576500 | 3.64159000  |
| C | 5.08849500 | -4.86038800 | 1.08756900  |
| C | 5.17617100 | 3.92944400  | -2.28483500 |
| C | 5.12928800 | 1.69933200  | -4.04168100 |
| C | 5.10704100 | 0.30122100  | -4.36595200 |
| C | 5.07571100 | -2.47427400 | -3.76924200 |
| C | 5.06779500 | -3.61000800 | -2.89206100 |
| C | 5.07446300 | -4.86017400 | -0.34727800 |
| C | 3.96738800 | 4.75191900  | -0.28451500 |
| C | 3.98071000 | 4.75599400  | 1.14513100  |
| C | 3.98413900 | 3.47273200  | 3.67603800  |
| C | 3.97552000 | 2.33513700  | 4.54253300  |
| C | 3.94333200 | -0.43943300 | 5.16507700  |
| C | 3.92224600 | -1.83494800 | 4.85373400  |
| C | 3.87782700 | -4.05926100 | 3.08949500  |
| C | 3.85739700 | -4.67921600 | 1.80136400  |
| C | 3.92457900 | 3.48539200  | -2.82471900 |
| C | 3.90223500 | 2.36538600  | -3.71435100 |
| C | 3.85781900 | -0.40383300 | -4.35366000 |
| C | 3.84149600 | -1.80349500 | -4.05890900 |
| C | 3.82647200 | -4.04725800 | -2.32050500 |
| C | 3.82957300 | -4.67641200 | -1.03703800 |
| C | 2.71903300 | 4.58747100  | -0.96672700 |
| C | 2.74546800 | 4.60262500  | 1.85393200  |
| C | 2.74906800 | 3.94942300  | 3.12781200  |
| C | 2.73196300 | 1.69073200  | 4.83801900  |
| C | 2.71487400 | 0.29569200  | 5.15850900  |
| C | 2.67299400 | -2.46592300 | 4.54694100  |
| C | 2.65097400 | -3.58590700 | 3.65537200  |
| C | 2.61167500 | -4.80999000 | 1.10860000  |
| C | 2.69985700 | 3.93423800  | -2.23729400 |
| C | 2.65398800 | 1.72720400  | -3.99871500 |

|   |             |             |             |
|---|-------------|-------------|-------------|
| C | 2.63139000  | 0.33142600  | -4.31200000 |
| C | 2.59870500  | -2.43447400 | -3.73449300 |
| C | 2.58988500  | -3.56396000 | -2.85518100 |
| C | 2.59737100  | -4.80611600 | -0.32148700 |
| C | 1.49250800  | 4.73697300  | -0.25654700 |
| C | 1.50473400  | 4.75083400  | 1.16488000  |
| C | 1.51245100  | 3.47470800  | 3.65288300  |
| C | 1.50593300  | 2.33298800  | 4.49821600  |
| C | 1.47090700  | -0.40132300 | 5.13068400  |
| C | 1.44891200  | -1.78995400 | 4.82415800  |
| C | 1.40642600  | -3.98077300 | 3.08107200  |
| C | 1.38621900  | -4.60178200 | 1.80351900  |
| C | 1.45497400  | 3.46845200  | -2.74789800 |
| C | 1.43149800  | 2.36869300  | -3.64216000 |
| C | 1.38864800  | -0.36139900 | -4.24945800 |
| C | 1.37122200  | -1.75243800 | -3.98076500 |
| C | 1.35579600  | -3.95251800 | -2.25680500 |
| C | 1.35767500  | -4.58694600 | -0.99007200 |
| C | 0.24357100  | 4.55033200  | -0.92411600 |
| C | 0.26588700  | 4.56771100  | 1.85295800  |
| C | 0.26901100  | 3.92159700  | 3.10500200  |
| C | 0.25818700  | 1.69246700  | 4.75534400  |
| C | 0.24240200  | 0.32059500  | 5.06933800  |
| C | 0.19539300  | -2.38802900 | 4.48435500  |
| C | 0.17214800  | -3.49443900 | 3.61375500  |
| C | 0.13366600  | -4.72398100 | 1.12309300  |
| C | 0.22598200  | 3.90934900  | -2.17653500 |
| C | 0.17926800  | 1.73788100  | -3.90564300 |
| C | 0.15798000  | 0.36180200  | -4.19827700 |
| C | 0.12433500  | -2.35500000 | -3.63713100 |
| C | 0.11457400  | -3.45769600 | -2.76436200 |
| C | 0.12057600  | -4.70944600 | -0.28540800 |
| C | -0.99284500 | 4.72693300  | -0.23533300 |
| C | -0.98143300 | 4.73392600  | 1.17683800  |
| C | -0.97239100 | 3.48770100  | 3.65723600  |
| C | -0.97811000 | 2.36146700  | 4.50975000  |

|   |             |             |             |
|---|-------------|-------------|-------------|
| C | -1.01201600 | -0.35426600 | 5.07985800  |
| C | -1.03505000 | -1.73109100 | 4.77601900  |
| C | -1.08049800 | -3.92012000 | 3.07949900  |
| C | -1.10123100 | -4.55406400 | 1.81932600  |
| C | -1.02591200 | 3.49149800  | -2.72001400 |
| C | -1.04950200 | 2.39116000  | -3.60194900 |
| C | -1.09272800 | -0.31644000 | -4.19480800 |
| C | -1.10964800 | -1.69974500 | -3.91931100 |
| C | -1.12960200 | -3.87872100 | -2.20516200 |
| C | -1.12695500 | -4.52694800 | -0.95325100 |
| C | -2.23727800 | 4.59677100  | -0.91598800 |
| C | -2.21782300 | 4.59338800  | 1.87248100  |
| C | -2.21350800 | 3.96550500  | 3.14540600  |
| C | -2.22209900 | 1.76033800  | 4.85748000  |
| C | -2.23937900 | 0.36704700  | 5.14348600  |
| C | -2.28616900 | -2.35511100 | 4.51490200  |
| C | -2.30974700 | -3.47769400 | 3.64786100  |
| C | -2.34779300 | -4.72582700 | 1.15309500  |
| C | -2.25574400 | 3.97390100  | -2.18704200 |
| C | -2.29802200 | 1.79307300  | -3.93015100 |
| C | -2.31965900 | 0.40536700  | -4.21399500 |
| C | -2.35358500 | -2.33018200 | -3.64121000 |
| C | -2.36296400 | -3.43552300 | -2.75235900 |
| C | -2.36049000 | -4.70767700 | -0.26701500 |
| C | -3.46950200 | 4.80128500  | -0.22344100 |
| C | -3.45904700 | 4.79776300  | 1.19882700  |
| C | -3.45106300 | 3.56175100  | 3.73618700  |
| C | -3.45586200 | 2.43959200  | 4.61367500  |
| C | -3.48669200 | -0.32704400 | 5.19876500  |
| C | -3.51005300 | -1.71350600 | 4.87494000  |
| C | -3.55866600 | -3.94613400 | 3.13878200  |
| C | -3.57799500 | -4.58281200 | 1.86463100  |
| C | -3.50226500 | 3.58721400  | -2.76826800 |
| C | -3.52463100 | 2.47212700  | -3.65509700 |
| C | -3.56719100 | -0.28763600 | -4.26143100 |
| C | -3.58501000 | -1.68050400 | -3.96534900 |

|   |             |             |             |
|---|-------------|-------------|-------------|
| C | -3.60263000 | -3.89914300 | -2.21847500 |
| C | -3.60110100 | -4.55318400 | -0.95551000 |
| C | -4.71448400 | 4.68557600  | -0.92046700 |
| C | -4.69363400 | 4.67066800  | 1.91306500  |
| C | -4.69041000 | 4.04301100  | 3.20105500  |
| C | -4.70096100 | 1.80956300  | 4.94487400  |
| C | -4.71640700 | 0.40785400  | 5.24358700  |
| C | -4.76100900 | -2.35648400 | 4.60156100  |
| C | -4.78569100 | -3.48589200 | 3.71972600  |
| C | -4.82739100 | -4.73993500 | 1.17882700  |
| C | -4.73216800 | 4.06882300  | -2.21346400 |
| C | -4.77501800 | 1.84794400  | -3.97205300 |
| C | -4.79632000 | 0.44799300  | -4.28145500 |
| C | -4.83139000 | -2.32237700 | -3.66968800 |
| C | -4.83931400 | -3.45069400 | -2.78473000 |
| C | -4.83914000 | -4.72705300 | -0.25415400 |
| C | -5.94178800 | 4.86095800  | -0.21142300 |
| C | -5.93118100 | 4.85164000  | 1.22438500  |
| C | -5.92546900 | 3.60527100  | 3.76774500  |
| C | -5.93083800 | 2.47360000  | 4.65142500  |
| C | -5.95992500 | -0.29422200 | 5.25154200  |
| C | -5.98253000 | -1.69314600 | 4.92720000  |
| C | -6.03219000 | -3.92049900 | 3.17637600  |
| C | -6.05312700 | -4.55390900 | 1.88761600  |
| C | -5.97709600 | 3.63807200  | -2.76453400 |
| C | -5.99918700 | 2.51116700  | -3.65461600 |
| C | -6.04069700 | -0.25294000 | -4.27806900 |
| C | -6.05816900 | -1.65503800 | -3.96549200 |
| C | -6.07596300 | -3.89248800 | -2.22593600 |
| C | -6.07551200 | -4.53716000 | -0.94212200 |
| C | -7.18727500 | 4.70721500  | -0.89930800 |
| C | -7.16545100 | 4.68939800  | 1.93080300  |
| C | -7.16258700 | 4.06098200  | 3.21013000  |
| C | -7.17446600 | 1.83183500  | 4.95344100  |
| C | -7.18914700 | 0.43962500  | 5.25743900  |
| C | -7.23268700 | -2.31903100 | 4.62005700  |

|   |             |             |             |
|---|-------------|-------------|-------------|
| C | -7.25752800 | -3.43790400 | 3.73745400  |
| C | -7.29927300 | -4.67658000 | 1.19422200  |
| C | -7.20507200 | 4.09051000  | -2.18430800 |
| C | -7.24776300 | 1.87219800  | -3.94148900 |
| C | -7.26886400 | 0.48182500  | -4.25620100 |
| C | -7.30267800 | -2.28253300 | -3.63865500 |
| C | -7.31137500 | -3.40838000 | -2.76427700 |
| C | -7.31064600 | -4.66920700 | -0.23082600 |
| C | -8.42633800 | 4.88709100  | -0.19207500 |
| C | -8.41541800 | 4.87788000  | 1.24593200  |
| C | -8.40986100 | 3.63115300  | 3.78138700  |
| C | -8.41582700 | 2.49920600  | 4.66802900  |
| C | -8.44502900 | -0.26039100 | 5.27644100  |
| C | -8.46715700 | -1.66133900 | 4.95313800  |
| C | -8.51638000 | -3.87558400 | 3.19786200  |
| C | -8.53745700 | -4.50312300 | 1.90441600  |
| C | -8.46188300 | 3.66491800  | -2.73808900 |
| C | -8.48371900 | 2.53825100  | -3.63148900 |
| C | -8.52521400 | -0.21774400 | -4.25788300 |
| C | -8.54236900 | -1.62137300 | -3.94440300 |
| C | -8.56087000 | -3.85115700 | -2.20742600 |
| C | -8.56038300 | -4.49030200 | -0.91918100 |
| C | -9.66810600 | 4.80160800  | -0.89379600 |
| C | -9.64566400 | 4.78450000  | 1.96697500  |
| C | -9.64277900 | 4.14260600  | 3.27131600  |
| C | -9.65492000 | 1.89115900  | 5.03763100  |
| C | -9.66969500 | 0.47209600  | 5.35241700  |
| C | -9.71364500 | -2.31615700 | 4.70930500  |
| C | -9.73924600 | -3.45378900 | 3.80462800  |
| C | -9.78120000 | -4.69785100 | 1.22878400  |
| C | -9.68639200 | 4.17284500  | -2.20436800 |
| C | -9.72934300 | 1.93314900  | -3.98429500 |
| C | -9.75066700 | 0.51570300  | -4.30701700 |
| C | -9.78459300 | -2.27794600 | -3.68397900 |
| C | -9.79402800 | -3.42395600 | -2.78951600 |
| C | -9.79288000 | -4.69168700 | -0.22494000 |

|   |              |             |             |
|---|--------------|-------------|-------------|
| C | -10.85757800 | 5.05418400  | -0.14402800 |
| C | -10.84689400 | 5.04601900  | 1.23953900  |
| C | -10.84084300 | 3.72430800  | 3.92714000  |
| C | -10.84666000 | 2.63603600  | 4.78152600  |
| C | -10.87720400 | -0.28645900 | 5.43476100  |
| C | -10.89840000 | -1.63444900 | 5.12387200  |
| C | -10.95094500 | -3.97423800 | 3.25544500  |
| C | -10.97127300 | -4.57532600 | 2.00939000  |
| C | -10.89523300 | 3.76041900  | -2.84375900 |
| C | -10.91599100 | 2.67755900  | -3.70487000 |
| C | -10.95988500 | -0.24186000 | -4.37220100 |
| C | -10.97630800 | -1.59227400 | -4.07125700 |
| C | -10.99620400 | -3.95040700 | -2.22516800 |
| C | -10.99576500 | -4.56310800 | -0.98470100 |
| H | -11.81458000 | 5.13505900  | -0.65767400 |
| H | -11.79560100 | 5.12114400  | 1.76915300  |
| H | -11.79134100 | 4.18719500  | 3.66548800  |
| H | -11.80156100 | 2.27865900  | 5.16432100  |
| H | -11.82208800 | 0.21895700  | 5.62933300  |
| H | -11.85931300 | -2.14551600 | 5.08406900  |
| H | -11.89754600 | -3.79270900 | 3.76250100  |
| H | -11.93325000 | -4.84636400 | 1.57655700  |
| H | -11.84097500 | 4.22216800  | -2.56339900 |
| H | -11.87736800 | 2.32342500  | -4.07434100 |
| H | -11.90806800 | 0.26535800  | -4.54492900 |
| H | -11.93685000 | -2.10278000 | -4.01737200 |
| H | -11.95117200 | -3.76471800 | -2.71477300 |
| H | -11.95028300 | -4.83882600 | -0.53848600 |

**(5,5)@Cycle-8**

|   |             |            |            |
|---|-------------|------------|------------|
| C | -1.45498200 | 1.90266900 | 7.13082000 |
| C | 0.79586700  | 2.38696400 | 6.37068600 |
| C | -1.26323900 | 0.54503500 | 6.85410000 |
| H | -2.41388700 | 2.24810200 | 7.52406200 |
| C | 0.98490300  | 1.02913600 | 6.08330500 |
| H | 1.58240200  | 3.11158700 | 6.16127800 |

|   |             |              |             |
|---|-------------|--------------|-------------|
| H | -2.06814500 | -0.17128900  | 7.01493200  |
| H | 1.92660400  | 0.69130400   | 5.64998800  |
| C | -2.04396400 | -7.10771000  | 2.06564800  |
| C | -0.92559100 | -8.29631300  | 3.97449700  |
| C | -1.34030600 | -7.13735800  | 3.36473400  |
| C | -1.21599200 | -5.79870500  | 3.97693800  |
| C | -0.03801200 | -5.35871700  | 4.60539200  |
| C | -2.18486700 | -3.60447800  | 4.39312700  |
| C | 0.08226000  | -4.07396100  | 5.15111100  |
| H | 0.82739600  | -6.01994900  | 4.63302100  |
| H | -2.95261500 | -2.84969800  | 4.24919300  |
| H | 1.01748700  | -3.76575700  | 5.61274000  |
| C | -0.03656300 | 0.09680500   | 6.33181400  |
| C | -1.00741200 | -3.19593900  | 5.04248300  |
| C | 0.18732600  | -1.37057600  | 6.05671000  |
| H | 0.40435800  | -1.92711300  | 6.98819700  |
| H | 1.04008000  | -1.50964300  | 5.37234800  |
| O | -1.01312800 | -1.89467700  | 5.46826400  |
| C | -2.31791900 | -4.89125600  | 3.85066500  |
| C | -3.50474700 | -5.32727000  | 3.06882300  |
| C | -4.79785500 | -4.94456400  | 3.36815500  |
| S | -5.25115300 | -3.84040000  | 4.71228400  |
| S | -6.25372300 | -5.56522900  | 2.51239300  |
| C | -6.98989500 | -3.94427200  | 4.48837700  |
| H | -7.61431800 | -3.35369700  | 5.15547200  |
| C | -7.44366500 | -4.72345800  | 3.48822700  |
| H | -8.48977800 | -4.85102700  | 3.21845400  |
| S | -0.20037700 | -8.35732100  | 5.62014300  |
| C | -0.75018100 | -10.81884000 | 4.75064900  |
| H | -0.84752700 | -11.90243700 | 4.72709500  |
| S | -1.16831600 | -9.93939400  | 3.28336200  |
| C | -0.31290200 | -10.10530600 | 5.80608600  |
| H | -0.00485900 | -10.52679800 | 6.76085000  |
| C | -2.26420900 | -7.76345500  | -0.27927800 |
| C | -3.15951100 | -6.22443100  | 1.93378600  |
| C | -3.81368900 | -6.17726500  | 0.68624400  |



|   |             |             |             |
|---|-------------|-------------|-------------|
| H | -4.65033100 | -5.50278800 | 0.54328500  |
| C | -3.38874900 | -6.93154700 | -0.40835200 |
| H | -3.91238100 | -6.85968200 | -1.36105000 |
| C | -1.60133200 | -7.84740300 | 0.95272800  |
| H | -0.70339900 | -8.45986500 | 1.01354800  |
| O | -1.80011800 | -8.52759100 | -1.32797300 |
| C | 0.75830700  | 6.59763600  | -1.76184400 |
| C | 0.61153800  | 7.43520600  | 0.93123600  |
| C | -0.42943500 | 6.42602000  | -1.02771900 |
| H | -1.24262900 | 5.90148200  | -1.51802600 |
| C | 1.88265300  | 7.18098700  | -1.15131600 |
| H | 2.82028100  | 7.29698900  | -1.68979400 |
| C | 1.79092600  | 7.59165200  | 0.18429000  |
| H | 2.67556200  | 8.00495400  | 0.66833400  |
| C | -0.51956200 | 6.80676900  | 0.31886900  |
| C | -1.68916900 | 6.49471100  | 1.18279900  |
| C | 0.50759500  | 7.82053200  | 2.35512500  |
| C | -0.19192800 | 6.80405700  | 3.16784500  |
| C | -1.30590000 | 6.13242200  | 2.57197100  |
| C | 0.23719200  | 6.43946200  | 4.45136000  |
| H | 1.11886300  | 6.89751400  | 4.89607300  |
| C | -1.92213800 | 5.10304900  | 3.30723300  |
| H | -2.72325200 | 4.52356400  | 2.85534000  |
| C | -1.51034100 | 4.75513400  | 4.60050500  |
| H | -1.99783000 | 3.92884500  | 5.11111200  |
| C | -0.43001300 | 5.44199400  | 5.18208100  |
| O | 0.07277700  | 5.21321300  | 6.44214500  |
| C | -0.42446300 | 2.83207700  | 6.90555700  |
| C | -0.63102900 | 4.28835000  | 7.28169600  |
| C | 0.93680800  | 9.02973000  | 2.84291800  |
| C | -2.99923700 | 6.57323300  | 0.76497600  |
| S | 0.71924900  | 9.57139600  | 4.54493600  |
| S | 1.66446500  | 10.31455700 | 1.81384300  |
| S | -3.51314700 | 7.02033700  | -0.89713400 |
| S | -4.40889700 | 6.34530800  | 1.85862000  |
| C | 1.57222500  | 11.59155400 | 3.02354300  |

|   |             |             |             |
|---|-------------|-------------|-------------|
| H | 1.88322400  | 12.58951500 | 2.72097000  |
| C | 1.14484800  | 11.25625600 | 4.25613800  |
| H | 1.05989200  | 11.94316700 | 5.09586900  |
| C | -5.64748400 | 6.62999400  | 0.64828400  |
| H | -6.68417500 | 6.51708500  | 0.95747800  |
| C | -5.24259000 | 6.93443600  | -0.59999400 |
| H | -5.90384600 | 7.11126500  | -1.44547700 |
| H | -0.22669000 | 4.48319300  | 8.28653300  |
| H | -1.70884900 | 4.52891900  | 7.29414200  |
| O | 0.73761600  | 6.11135800  | -3.04263400 |
| C | 2.01352300  | 5.89654300  | -3.67795600 |
| H | 2.67818300  | 5.37118100  | -2.97028500 |
| H | 2.48067300  | 6.86586100  | -3.92884800 |
| C | 1.79481500  | 5.03151600  | -4.91684500 |
| H | 1.29607500  | 5.61062700  | -5.70909700 |
| H | 1.11038500  | 4.22105900  | -4.63198700 |
| C | 3.11963100  | 4.41964600  | -5.41733200 |
| H | 3.69892700  | 5.15890500  | -5.99535300 |
| H | 3.73832100  | 4.15470000  | -4.54422600 |
| C | 2.90983200  | 3.13868400  | -6.24173900 |
| H | 2.41254000  | 3.37169800  | -7.19871600 |
| H | 2.22021500  | 2.48215900  | -5.68627600 |
| C | 4.21679900  | 2.36823300  | -6.49344100 |
| H | 4.86814900  | 2.93280000  | -7.18288900 |
| H | 4.76780800  | 2.28631400  | -5.54165100 |
| C | 3.96710200  | 0.95293300  | -7.03148600 |
| H | 3.42516400  | 1.00221800  | -7.99206300 |
| H | 3.29581100  | 0.43397200  | -6.32853200 |
| C | 5.24404400  | 0.11291600  | -7.20997800 |
| H | 5.80283900  | 0.46082300  | -8.09565500 |
| H | 5.90924800  | 0.25118700  | -6.34227600 |
| C | 4.90469400  | -1.38739800 | -7.34891600 |
| H | 4.06035100  | -1.48266400 | -8.05843900 |
| H | 4.53345100  | -1.74873200 | -6.37861100 |
| C | -1.38330600 | -7.78528300 | -2.49791500 |
| H | -1.41999900 | -8.50531500 | -3.32852200 |

|   |             |             |             |
|---|-------------|-------------|-------------|
| H | -2.09508500 | -6.97029600 | -2.71629000 |
| C | 0.03458900  | -7.23396500 | -2.33155500 |
| H | 0.06166000  | -6.54909300 | -1.46878800 |
| H | 0.70505100  | -8.07683400 | -2.09766000 |
| C | 0.52254300  | -6.50889600 | -3.59719200 |
| H | -0.00919100 | -5.54856000 | -3.70127500 |
| H | 0.26761500  | -7.10765900 | -4.49017100 |
| C | 2.03844100  | -6.25952900 | -3.58721700 |
| H | 2.31345100  | -5.70437200 | -2.67723300 |
| H | 2.56229200  | -7.22966600 | -3.53104700 |
| C | 2.52267500  | -5.49046600 | -4.82441100 |
| H | 1.98954100  | -4.52596200 | -4.88605700 |
| H | 2.24903800  | -6.05573900 | -5.73312300 |
| C | 4.03520400  | -5.22161400 | -4.82055000 |
| H | 4.27706000  | -4.56118300 | -3.97396200 |
| H | 4.58244700  | -6.16372500 | -4.64233400 |
| C | 4.52879500  | -4.57800900 | -6.12747100 |
| H | 3.83631400  | -3.77344500 | -6.42013800 |
| H | 4.50311600  | -5.31831600 | -6.94435200 |
| C | 5.95101900  | -3.98589200 | -5.99250800 |
| H | 6.63485200  | -4.77156600 | -5.63310100 |
| H | 5.91827900  | -3.22162300 | -5.20239600 |
| C | 6.49742200  | -3.37342900 | -7.26681200 |
| C | 6.04405500  | -2.24370000 | -7.84028400 |
| H | 6.51893300  | -1.90222900 | -8.76682800 |
| H | 7.31583500  | -3.90628300 | -7.75998300 |
| C | 11.26439600 | -3.79642800 | -0.54293100 |
| C | 11.11745400 | -3.95302300 | 0.82243500  |
| C | 9.85163200  | -3.70986500 | 1.45029300  |
| C | 8.69662400  | -3.76816500 | 0.61387000  |
| C | 8.85010200  | -3.60612600 | -0.81035200 |
| C | 10.15299300 | -3.38955500 | -1.35191300 |
| C | 7.38944200  | -3.57493700 | 1.18354100  |
| C | 7.28528400  | -2.87004400 | 2.41864600  |
| C | 8.49296500  | -2.38959200 | 3.03576200  |
| C | 9.74530900  | -2.99322000 | 2.71191400  |

|   |             |             |             |
|---|-------------|-------------|-------------|
| C | 8.47726700  | -1.07806900 | 3.63356000  |
| C | 9.71432200  | -0.41259200 | 3.88777500  |
| C | 10.88556200 | -1.23513400 | 3.97054000  |
| C | 10.90063800 | -2.49278700 | 3.39755400  |
| C | 7.68747600  | -3.26156500 | -1.58368100 |
| C | 6.37909700  | -3.53334300 | -1.06545500 |
| C | 6.22494800  | -3.69425400 | 0.35658300  |
| C | 4.93104700  | -3.50760600 | 0.93048500  |
| C | 4.82600200  | -2.79491900 | 2.17620200  |
| C | 6.02007900  | -2.30550800 | 2.78735100  |
| C | 6.00465200  | -0.99566700 | 3.38526800  |
| C | 7.25470100  | -0.32166000 | 3.58093900  |
| C | 5.23176200  | -3.19389900 | -1.84221600 |
| C | 3.92001200  | -3.44557500 | -1.31751100 |
| C | 3.76626700  | -3.60610400 | 0.09640000  |
| C | 2.46516400  | -3.42246500 | 0.67096700  |
| C | 2.36067400  | -2.70649500 | 1.91573200  |
| C | 3.56105100  | -2.21390700 | 2.52810400  |
| C | 3.54684500  | -0.91013700 | 3.12222600  |
| C | 4.79603900  | -0.23737400 | 3.34332000  |
| C | 2.76858400  | -3.11212500 | -2.10388500 |
| C | 0.00798500  | -3.32429800 | 0.40879300  |
| C | -0.09352300 | -2.60558000 | 1.64245800  |
| C | 1.10421100  | -2.12605200 | 2.26612100  |
| C | 1.09068300  | -0.81758800 | 2.86475100  |
| C | 2.33310400  | -0.14778700 | 3.08182800  |
| C | 0.31123100  | -3.03295700 | -2.37066300 |
| C | -1.00078900 | -3.28970700 | -1.84834900 |
| C | -1.15454300 | -3.43258600 | -0.42430600 |
| C | -2.44452200 | -3.21825300 | 0.14625800  |
| C | -2.54571200 | -2.50500100 | 1.38671800  |
| C | -1.35164300 | -2.02370500 | 2.00026000  |
| C | -1.36768800 | -0.72795600 | 2.61854400  |
| C | -0.12113400 | -0.05502800 | 2.83016000  |
| C | -2.14746900 | -2.95380600 | -2.63312200 |
| C | -3.45864700 | -3.18536800 | -2.09870000 |

|   |              |             |             |
|---|--------------|-------------|-------------|
| C | -3.60687300  | -3.30681600 | -0.68402100 |
| C | -4.90394900  | -3.11596100 | -0.10339600 |
| C | -5.00620900  | -2.42427300 | 1.14982900  |
| C | -3.80440500  | -1.93472500 | 1.75805600  |
| C | -3.82349900  | -0.64785900 | 2.38238600  |
| C | -2.57790300  | 0.02671100  | 2.60281800  |
| C | -4.61636100  | -2.85488900 | -2.88108400 |
| C | -5.91711200  | -3.09759400 | -2.34615400 |
| C | -6.06427500  | -3.23844100 | -0.92120500 |
| C | -7.35914500  | -3.04410900 | -0.34065800 |
| C | -7.45985500  | -2.34713700 | 0.89922300  |
| C | -6.26370200  | -1.86743900 | 1.52370700  |
| C | -6.28356200  | -0.56624600 | 2.13947900  |
| C | -5.04441000  | 0.10806400  | 2.35604000  |
| C | -7.07401700  | -2.74553500 | -3.11396400 |
| C | -8.38853400  | -2.99949000 | -2.58690700 |
| C | -8.53528800  | -3.15818400 | -1.16145900 |
| C | -9.82841400  | -3.02283300 | -0.57281100 |
| C | -9.93158100  | -2.31104600 | 0.69324900  |
| C | -8.73373200  | -1.79046300 | 1.26937300  |
| C | -8.75330800  | -0.48086000 | 1.87286500  |
| C | -7.49849400  | 0.19152700  | 2.08090900  |
| C | -9.53896900  | -2.70231200 | -3.37775200 |
| C | -10.81445300 | -3.02675900 | -2.81024800 |
| C | -10.95521600 | -3.18421300 | -1.44394300 |
| C | -9.96826700  | 0.26858000  | 1.87295600  |
| C | -11.18398100 | -0.47301100 | 1.70873800  |
| C | -11.16599400 | -1.73088800 | 1.13539400  |
| C | -7.42308000  | 1.58798000  | 1.80076900  |
| C | -8.60513200  | 2.25460700  | 1.32340100  |
| C | -9.89123800  | 1.69342200  | 1.58550300  |
| C | -4.96863600  | 1.51763500  | 2.07727500  |
| C | -6.13528500  | 2.18111400  | 1.59137200  |
| C | -5.99128700  | 3.13969100  | 0.52710100  |
| C | -7.14311000  | 3.46665300  | -0.25866800 |
| C | -8.46113200  | 3.22409000  | 0.26568700  |

|   |              |             |             |
|---|--------------|-------------|-------------|
| C | -9.60912300  | 3.60443500  | -0.49293400 |
| C | -10.88875800 | 3.36657500  | 0.10808000  |
| C | -11.02633300 | 2.43466800  | 1.12001300  |
| C | -6.99198900  | 3.62289600  | -1.66851100 |
| C | -8.16466200  | 3.53278700  | -2.49667100 |
| C | -9.45435900  | 3.76750700  | -1.93102300 |
| C | -4.68923800  | 3.38581400  | 0.00075800  |
| C | -4.53657900  | 3.54085300  | -1.41837000 |
| C | -5.69339800  | 3.44602800  | -2.24750000 |
| C | -5.59027800  | 2.73911100  | -3.49803100 |
| C | -6.79271200  | 2.24576800  | -4.10128900 |
| C | -8.06208400  | 2.82451600  | -3.74833100 |
| C | -9.25257300  | 2.37339400  | -4.39353200 |
| C | -10.47461500 | 3.02583800  | -4.02516000 |
| C | -10.57299100 | 3.70490600  | -2.82509000 |
| C | -6.77907300  | 0.95233200  | -4.70180300 |
| C | -8.03676500  | 0.28784100  | -4.91947000 |
| C | -9.23981100  | 1.05150200  | -5.00170400 |
| C | -4.33450100  | 2.16487100  | -3.86061300 |
| C | -4.31928100  | 0.86113500  | -4.46902100 |
| C | -5.56296900  | 0.19320500  | -4.68201000 |
| C | -5.64249100  | -1.21832500 | -4.40886500 |
| C | -6.93437700  | -1.78985900 | -4.16283600 |
| C | -8.11706200  | -1.12382800 | -4.63953900 |
| C | -9.39754300  | -1.72465200 | -4.44642700 |
| C | -10.52665800 | -1.02665900 | -4.98736800 |
| C | -10.44949400 | 0.32649300  | -5.25886900 |
| C | -4.47411400  | -1.89150000 | -3.93933100 |
| C | -3.23677300  | 3.34336100  | -1.99335000 |
| C | -3.13319000  | 2.64327600  | -3.23728700 |
| C | -3.53575700  | 3.05152200  | 0.78451500  |
| C | -3.67710300  | 2.10178400  | 1.84608700  |
| C | -3.10268800  | 0.09752000  | -4.42789200 |
| C | -3.18032200  | -1.30692100 | -4.15983500 |
| C | -2.07578500  | 3.44725100  | -1.16145500 |
| C | -2.22762200  | 3.31142600  | 0.26139400  |

|   |             |             |             |
|---|-------------|-------------|-------------|
| C | -2.50293000 | 1.43918600  | 2.33479100  |
| C | -1.87024700 | 2.07212600  | -3.60383200 |
| C | -1.85286500 | 0.76943800  | -4.21642900 |
| C | -2.00507300 | -1.98567500 | -3.68973900 |
| C | -0.78337000 | 3.25311500  | -1.73288700 |
| C | -0.67850700 | 2.55146000  | -2.98024300 |
| C | -1.08050300 | 2.98343500  | 1.04383500  |
| C | -1.22086000 | 2.02391000  | 2.10424900  |
| C | -0.64284800 | 0.01015000  | -4.17841300 |
| C | -0.71963200 | -1.40186700 | -3.91015600 |
| C | 0.37713200  | 3.36601100  | -0.90131800 |
| C | 0.22707700  | 3.23431200  | 0.51450700  |
| C | -0.04524800 | 1.35018500  | 2.57265400  |
| C | 0.58454700  | 1.97398500  | -3.33322300 |
| C | 0.60397400  | 0.68221900  | -3.94792200 |
| C | 0.45416000  | -2.07126500 | -3.42355900 |
| C | 1.67524200  | 3.18840400  | -1.47810400 |
| C | 1.78055500  | 2.46725500  | -2.71655500 |
| C | 1.38243400  | 2.91227100  | 1.30009900  |
| C | 1.24221800  | 1.94112200  | 2.35311400  |
| C | 1.82106700  | -0.07402500 | -3.91233600 |
| C | 1.74512900  | -1.48597700 | -3.64728100 |
| C | 2.83484500  | 3.31024200  | -0.65377900 |
| C | 2.68491100  | 3.16512500  | 0.77060000  |
| C | 2.41079000  | 1.26567300  | 2.81908000  |
| C | 3.03844000  | 1.90268600  | -3.07844000 |
| C | 3.05881700  | 0.60122500  | -3.68590100 |
| C | 2.91300100  | -2.15032800 | -3.16290500 |
| C | 4.13303200  | 3.11553700  | -1.23209100 |
| C | 4.23642900  | 2.39891900  | -2.46777100 |
| C | 3.84119500  | 2.81706200  | 1.54518000  |
| C | 3.70114200  | 1.84743300  | 2.58991600  |
| C | 4.27558400  | -0.15261500 | -3.64483500 |
| C | 4.20065400  | -1.55537700 | -3.37383200 |
| C | 5.30170800  | 3.22890300  | -0.40557600 |
| C | 5.15154400  | 3.07290800  | 1.01716300  |

|   |             |             |             |
|---|-------------|-------------|-------------|
| C | 4.87497500  | 1.17339800  | 3.06800100  |
| C | 5.50260500  | 1.83436100  | -2.83796800 |
| C | 5.52150600  | 0.52675600  | -3.43794600 |
| C | 5.37464500  | -2.22070400 | -2.88969700 |
| C | 6.59341400  | 3.03821400  | -0.98329900 |
| C | 6.69681300  | 2.32598800  | -2.23054400 |
| C | 6.30052600  | 2.72793200  | 1.79083200  |
| C | 6.15880500  | 1.75489100  | 2.84243200  |
| C | 6.73219000  | -0.22712800 | -3.39773600 |
| C | 6.65631800  | -1.63511700 | -3.11339900 |
| C | 7.75828500  | 3.12496300  | -0.15221400 |
| C | 7.60921700  | 2.96567500  | 1.25684800  |
| C | 7.33302300  | 1.07490800  | 3.30400400  |
| C | 7.95901300  | 1.74311100  | -2.58090200 |
| C | 7.97700400  | 0.44612900  | -3.17365700 |
| C | 7.82823400  | -2.29772700 | -2.62521600 |
| C | 9.06506800  | 2.94509900  | -0.72656900 |
| C | 9.16847900  | 2.23471100  | -1.97668000 |
| C | 8.77251900  | 2.63077600  | 2.03419500  |
| C | 8.63035800  | 1.65802300  | 3.08834600  |
| C | 9.20158300  | -0.30778200 | -3.13640300 |
| C | 9.12499600  | -1.71942600 | -2.85400500 |
| C | 10.22630800 | 3.09030200  | 0.09074500  |
| C | 10.07413100 | 2.92551800  | 1.52813700  |
| C | 9.79431400  | 1.01183100  | 3.60295800  |
| C | 10.42975800 | 1.69313300  | -2.36887500 |
| C | 10.44712800 | 0.36941500  | -2.97209500 |
| C | 10.29607300 | -2.40796300 | -2.41631500 |
| C | 11.49608600 | 2.94150200  | -0.55802700 |
| C | 11.59528400 | 2.26097900  | -1.75683500 |
| C | 11.18506200 | 2.60389500  | 2.37536300  |
| C | 11.04869500 | 1.67146200  | 3.38648400  |
| C | 11.62998600 | -0.44061700 | -2.98697800 |
| C | 11.55642100 | -1.79397900 | -2.71616200 |
| C | 1.30826200  | -3.52651800 | -0.16180600 |
| C | 1.46334200  | -3.36880700 | -1.58387700 |



|   |              |             |             |
|---|--------------|-------------|-------------|
| H | -11.37851700 | 2.85301500  | -4.60844400 |
| H | -11.55214600 | 4.04943400  | -2.49378300 |
| H | -11.49772700 | -1.51876700 | -5.03225900 |
| H | -11.36180200 | 0.86607000  | -5.51116500 |
| H | -11.95730300 | -3.26834500 | -1.02450500 |
| H | -11.70898600 | -2.99088400 | -3.43126100 |
| H | -11.78563100 | 3.79426600  | -0.33898000 |
| H | -12.02786500 | 2.15265600  | 1.44350000  |
| H | -12.14354600 | 0.01351900  | 1.88143800  |
| H | -12.11216400 | -2.20237800 | 0.87135900  |
| H | 12.40916600  | 3.21922700  | -0.03239100 |
| H | 12.58399800  | 2.01964700  | -2.14577100 |
| H | 12.60979700  | 0.03174800  | -3.04957200 |
| H | 12.48004300  | -2.35373700 | -2.57229900 |
| H | 12.26549200  | -3.82529500 | -0.97195400 |
| H | 12.00655300  | -4.10115100 | 1.43452300  |
| H | 11.84621500  | -3.02978900 | 3.32957600  |
| H | 11.81965500  | -0.81278100 | 4.33961500  |
| H | 11.94072900  | 1.32460200  | 3.90712800  |
| H | 12.18099800  | 2.96792800  | 2.12498200  |

**(6,6)@Cycle-8**

|   |             |             |             |
|---|-------------|-------------|-------------|
| C | 0.52073400  | -0.88525600 | -7.03535200 |
| C | 2.85430100  | -0.25150900 | -6.91296600 |
| C | 0.14045400  | 0.43371900  | -6.73940700 |
| H | -0.24695800 | -1.64527500 | -7.19574000 |
| C | 2.48064700  | 1.05918800  | -6.61496500 |
| H | 3.90899900  | -0.52479100 | -6.95813900 |
| H | -0.91081000 | 0.69872100  | -6.64660800 |
| H | 3.24755200  | 1.81224900  | -6.42625800 |
| C | -3.51066400 | 7.04022700  | -1.93322500 |
| C | -2.16547900 | 8.77586700  | -3.14237300 |
| C | -2.48589400 | 7.45731400  | -2.91270300 |
| C | -1.94211200 | 6.33531800  | -3.70347500 |
| C | -0.58863300 | 6.24833700  | -4.06962500 |
| C | -2.30052600 | 4.18005300  | -4.78891400 |

|   |             |             |             |
|---|-------------|-------------|-------------|
| C | -0.08556700 | 5.18536200  | -4.82897300 |
| H | 0.10685700  | 7.01358900  | -3.72761100 |
| H | -2.90444000 | 3.30005600  | -4.99284300 |
| H | 0.96792200  | 5.17711100  | -5.09568800 |
| C | 1.12057300  | 1.41696100  | -6.53518300 |
| C | -0.95140700 | 4.13805400  | -5.18426900 |
| C | 0.79969900  | 2.86149700  | -6.22084600 |
| H | 1.02273400  | 3.51461500  | -7.08580000 |
| H | 1.44808100  | 3.17854700  | -5.38919200 |
| O | -0.57726500 | 3.00442800  | -5.86372300 |
| C | -2.82558000 | 5.26993200  | -4.07496200 |
| C | -4.24378300 | 5.35632100  | -3.64349500 |
| C | -5.29317100 | 4.91418500  | -4.42705400 |
| S | -5.10485200 | 4.14985500  | -6.04428100 |
| S | -7.02678600 | 5.14495400  | -4.00960600 |
| C | -6.80833000 | 4.16926400  | -6.47609900 |
| H | -7.07631700 | 3.79666100  | -7.46267500 |
| C | -7.67947200 | 4.61897000  | -5.55271900 |
| H | -8.75941300 | 4.66401400  | -5.67790000 |
| S | -1.06294500 | 9.32865300  | -4.45283200 |
| C | -2.32483800 | 11.40848200 | -3.36105500 |
| H | -2.65054500 | 12.42944900 | -3.17188500 |
| S | -2.91194000 | 10.15965300 | -2.26773800 |
| C | -1.48898800 | 11.03426000 | -4.34858900 |
| H | -1.03844700 | 11.70664700 | -5.07592200 |
| C | -4.58293300 | 7.17988800  | 0.26253000  |
| C | -4.43225100 | 6.01960000  | -2.32923700 |
| C | -5.43561400 | 5.65427700  | -1.41053100 |
| H | -6.12627100 | 4.85260400  | -1.65624800 |
| C | -5.53463100 | 6.23084900  | -0.14149000 |
| H | -6.31745800 | 5.90851200  | 0.54320700  |
| C | -3.57813400 | 7.57603100  | -0.63474300 |
| H | -2.82590900 | 8.28012700  | -0.28359500 |
| O | -4.61651500 | 7.77955500  | 1.50000700  |
| C | 3.06503100  | -6.78813000 | 1.07522900  |
| C | 3.91181200  | -6.52888300 | -1.61337000 |

|   |             |              |             |
|---|-------------|--------------|-------------|
| C | 2.13050700  | -6.84518900  | 0.02611200  |
| H | 1.07905500  | -6.88379800  | 0.29895100  |
| C | 4.42788800  | -6.60096300  | 0.78580600  |
| H | 5.16335400  | -6.51060400  | 1.58149600  |
| C | 4.82566600  | -6.45339500  | -0.54766400 |
| H | 5.86773800  | -6.21414000  | -0.75367700 |
| C | 2.52645300  | -6.73229200  | -1.31515900 |
| C | 1.55914200  | -6.72926300  | -2.43857800 |
| C | 4.30466600  | -6.34126200  | -3.02579500 |
| C | 3.31016000  | -5.58936400  | -3.82115600 |
| C | 1.92114600  | -5.80711000  | -3.53947600 |
| C | 3.67563900  | -4.67860100  | -4.82187000 |
| H | 4.72112600  | -4.43559700  | -4.99975800 |
| C | 0.97902100  | -5.08823300  | -4.29588900 |
| H | -0.07503500 | -5.14686600  | -4.03538800 |
| C | 1.34685600  | -4.21270100  | -5.32618700 |
| H | 0.57604700  | -3.64865700  | -5.84518900 |
| C | 2.70903600  | -4.02298000  | -5.60746100 |
| O | 3.21899500  | -3.23698900  | -6.60942400 |
| C | 1.87532500  | -1.23794900  | -7.13889900 |
| C | 2.31262700  | -2.62720400  | -7.55336000 |
| C | 5.43055500  | -6.91467100  | -3.57434500 |
| C | 0.46174800  | -7.56531100  | -2.48280400 |
| S | 5.88077500  | -6.81473400  | -5.31364400 |
| S | 6.55106600  | -7.98383000  | -2.65739100 |
| S | 0.05028300  | -8.76612800  | -1.20848900 |
| S | -0.66043600 | -7.67964700  | -3.88372600 |
| C | 7.41178300  | -8.60411800  | -4.06194200 |
| H | 8.16413500  | -9.37077500  | -3.88761600 |
| C | 7.10805500  | -8.07616600  | -5.26308500 |
| H | 7.57805100  | -8.35227500  | -6.20492800 |
| C | -1.49759000 | -9.13044000  | -3.34695000 |
| H | -2.25174000 | -9.54626200  | -4.01204600 |
| C | -1.17471100 | -9.62197100  | -2.13546900 |
| H | -1.62868200 | -10.49604800 | -1.67284000 |
| H | 2.90385400  | -2.56829000  | -8.47916600 |

|   |             |             |             |
|---|-------------|-------------|-------------|
| H | 1.44648600  | -3.27992200 | -7.74488800 |
| O | 2.53990200  | -6.84859200 | 2.33742900  |
| C | 3.34998000  | -6.33714300 | 3.41791200  |
| H | 3.85991300  | -5.42053100 | 3.08175800  |
| H | 4.12228400  | -7.07739400 | 3.69328500  |
| C | 2.42579800  | -6.00463700 | 4.58791900  |
| H | 2.03485200  | -6.92559300 | 5.04713700  |
| H | 1.56479000  | -5.46195300 | 4.17268900  |
| C | 3.12623600  | -5.10898300 | 5.63243200  |
| H | 3.78916000  | -5.70674900 | 6.27995000  |
| H | 3.77336600  | -4.39073600 | 5.10301100  |
| C | 2.12429100  | -4.30077500 | 6.47670600  |
| H | 1.57375000  | -4.96514100 | 7.16423500  |
| H | 1.37363700  | -3.87371600 | 5.79367400  |
| C | 2.77170000  | -3.14202000 | 7.25467600  |
| H | 3.39494500  | -3.52693900 | 8.08020700  |
| H | 3.45216200  | -2.60213700 | 6.57538100  |
| C | 1.73126800  | -2.14586000 | 7.79067100  |
| H | 1.08917200  | -2.63640500 | 8.54294200  |
| H | 1.06560200  | -1.85746300 | 6.96198800  |
| C | 2.34890600  | -0.87532300 | 8.39559300  |
| H | 2.87914900  | -1.12774200 | 9.33005600  |
| H | 3.10661700  | -0.46443000 | 7.70786700  |
| C | 1.28585600  | 0.21428700  | 8.67444700  |
| H | 0.41690600  | -0.26738700 | 9.15991100  |
| H | 0.92435100  | 0.61841200  | 7.71667300  |
| C | -4.58904300 | 6.90484900  | 2.65510900  |
| H | -5.15581600 | 7.42878300  | 3.43938500  |
| H | -5.09881800 | 5.95164600  | 2.43804200  |
| C | -3.14790000 | 6.65883300  | 3.10723800  |
| H | -2.60730400 | 6.12194100  | 2.31209800  |
| H | -2.65474600 | 7.63633900  | 3.23207200  |
| C | -3.06815100 | 5.86385200  | 4.42155400  |
| H | -3.49172200 | 4.85777900  | 4.27251600  |
| H | -3.68995300 | 6.35528400  | 5.19073600  |
| C | -1.62485700 | 5.73931500  | 4.93440100  |

|   |              |             |             |
|---|--------------|-------------|-------------|
| H | -0.99911300  | 5.30508300  | 4.13945700  |
| H | -1.21926400  | 6.74749400  | 5.12853300  |
| C | -1.48796900  | 4.87745100  | 6.19917500  |
| H | -1.94679300  | 3.89206400  | 6.01361800  |
| H | -2.05255000  | 5.33514000  | 7.03038000  |
| C | -0.01950400  | 4.67449100  | 6.60247800  |
| H | 0.52450800   | 4.26824300  | 5.73752000  |
| H | 0.44548100   | 5.65123100  | 6.82285500  |
| C | 0.18108600   | 3.73387100  | 7.80227400  |
| H | -0.46989800  | 2.84923600  | 7.70238200  |
| H | -0.12387600  | 4.24003300  | 8.73343200  |
| C | 1.64929600   | 3.24935900  | 7.91823900  |
| H | 2.31968900   | 4.11199700  | 7.76581600  |
| H | 1.84763500   | 2.54972200  | 7.09148400  |
| C | 1.96113200   | 2.60868500  | 9.25107200  |
| C | 1.79225800   | 1.31375900  | 9.57243100  |
| H | 2.05462700   | 0.99619500  | 10.58773500 |
| H | 2.31963200   | 3.28604700  | 10.03284900 |
| H | -12.31867800 | 0.33502100  | 4.30711300  |
| H | -12.61302600 | 1.75408300  | 2.35538800  |
| H | -12.68818800 | 2.00862700  | 0.23192900  |
| H | -12.54694900 | 1.07001900  | -2.00602000 |
| H | -12.25436500 | -0.61813300 | -3.29165100 |
| H | -11.81488400 | -2.99088900 | -3.58577700 |
| H | -11.94021500 | -1.59457000 | 5.15991200  |
| H | -11.49545500 | -3.96661000 | 4.86278700  |
| H | -11.19754500 | -5.64843900 | 3.57202600  |
| H | -11.05666800 | -6.58846100 | 1.33448500  |
| H | -11.13846100 | -6.34343300 | -0.79102200 |
| H | -11.43773600 | -4.92313800 | -2.74128300 |
| C | -11.43714600 | 0.76983200  | 3.83761400  |
| C | -11.60446400 | 1.57665400  | 2.72670300  |
| C | -11.70978300 | 1.92181900  | -0.23902000 |
| C | -11.62936500 | 1.38847100  | -1.51269300 |
| C | -11.22056900 | -0.96106800 | -3.31076300 |
| C | -10.97059200 | -2.31106400 | -3.47790700 |

|   |              |             |             |
|---|--------------|-------------|-------------|
| C | -10.91067300 | -1.92142500 | 5.01912100  |
| C | -10.65767700 | -3.27050800 | 4.84987600  |
| C | -10.24234700 | -5.61647000 | 3.04939800  |
| C | -10.16218900 | -6.15116500 | 1.77641100  |
| C | -10.27522300 | -5.81183800 | -1.18959000 |
| C | -10.44542200 | -5.00399500 | -2.29921400 |
| C | -10.13252000 | 0.35928500  | 4.25733000  |
| C | -10.47774200 | 2.02254300  | 1.96629100  |
| C | -10.52810600 | 2.18714300  | 0.52227100  |
| C | -10.36241300 | 1.08796100  | -2.10523600 |
| C | -10.16384700 | -0.05390400 | -2.98333100 |
| C | -9.64856100  | -2.83696500 | -3.32757500 |
| C | -9.87593700  | -0.95154700 | 4.83131300  |
| C | -9.35477100  | -3.73246600 | 4.48143800  |
| C | -9.15276200  | -4.87369200 | 3.60397800  |
| C | -8.98730800  | -5.97701300 | 0.97910600  |
| C | -9.04207400  | -5.81311500 | -0.46434800 |
| C | -9.39296700  | -4.14753600 | -2.75252200 |
| C | -9.02510400  | 1.10884100  | 3.75574300  |
| C | -9.19935500  | 1.94583900  | 2.59851200  |
| C | -9.29639700  | 2.25796900  | -0.19761800 |
| C | -9.21288400  | 1.70539500  | -1.52414500 |
| C | -8.82889100  | -0.50043400 | -3.22586200 |
| C | -8.56865400  | -1.90489600 | -3.39956000 |
| C | -8.52933600  | -1.42695200 | 4.86237300  |
| C | -8.26636000  | -2.82993400 | 4.68379100  |
| C | -7.87577000  | -5.03708600 | 2.98529100  |
| C | -7.79231600  | -5.59397500 | 1.66140500  |
| C | -7.89781200  | -5.27848500 | -1.13147900 |
| C | -8.07461400  | -4.43898700 | -2.28639900 |
| C | -7.68892200  | 0.78646700  | 4.17982800  |
| C | -8.02924700  | 2.42263100  | 1.91246800  |
| C | -8.07732700  | 2.57406900  | 0.49625700  |
| C | -7.91473100  | 1.49372100  | -2.10520200 |
| C | -7.72014900  | 0.37882100  | -2.97054100 |
| C | -7.21069900  | -2.37058800 | -3.31070300 |

|   |             |             |             |
|---|-------------|-------------|-------------|
| C | -7.43725600 | -0.49956800 | 4.73849400  |
| C | -6.92262800 | -3.24635300 | 4.38569300  |
| C | -6.72499600 | -4.36368500 | 3.52420700  |
| C | -6.56114100 | -5.45622900 | 0.93143700  |
| C | -6.61424400 | -5.29770200 | -0.48334900 |
| C | -6.96033800 | -3.65426300 | -2.74557600 |
| C | -6.58395500 | 1.57913100  | 3.73080000  |
| C | -6.75841300 | 2.41019300  | 2.57240900  |
| C | -6.85188800 | 2.70011900  | -0.23237200 |
| C | -6.77029000 | 2.15896700  | -1.56062200 |
| C | -6.38597100 | -0.04352000 | -3.27701900 |
| C | -6.12560000 | -1.44599900 | -3.44981300 |
| C | -6.08624500 | -0.96598500 | 4.83414300  |
| C | -5.82400600 | -2.36656400 | 4.65150500  |
| C | -5.43276300 | -4.57921000 | 2.94562300  |
| C | -5.34914300 | -5.13709900 | 1.62442300  |
| C | -5.45394700 | -4.82505100 | -1.17724200 |
| C | -5.63023000 | -3.98762700 | -2.33141500 |
| C | -5.26030800 | 1.25939200  | 4.16143300  |
| C | -5.60211100 | 2.88747400  | 1.88570700  |
| C | -5.64789500 | 3.01848700  | 0.46058800  |
| C | -5.48664300 | 1.95335000  | -2.14747500 |
| C | -5.29117900 | 0.83754000  | -3.02749800 |
| C | -4.77977300 | -1.91731800 | -3.37018400 |
| C | -5.00696200 | -0.03738900 | 4.72268500  |
| C | -4.49181300 | -2.79078700 | 4.36219800  |
| C | -4.29289900 | -3.91638800 | 3.49312200  |
| C | -4.12810200 | -5.01590300 | 0.89481600  |
| C | -4.18107600 | -4.85893900 | -0.53162400 |
| C | -4.52742600 | -3.21145600 | -2.80038000 |
| C | -4.15124700 | 2.04121400  | 3.69251400  |
| C | -4.32477700 | 2.86621900  | 2.53778200  |
| C | -4.42126300 | 3.13864500  | -0.26764500 |
| C | -4.33945500 | 2.60160000  | -1.58535900 |
| C | -3.95255800 | 0.40882200  | -3.31474500 |
| C | -3.69347500 | -0.98694700 | -3.49044600 |

|   |             |             |             |
|---|-------------|-------------|-------------|
| C | -3.65362900 | -0.50847300 | 4.80078800  |
| C | -3.39311400 | -1.90309400 | 4.61569300  |
| C | -3.00138500 | -4.12162900 | 2.90304400  |
| C | -2.91753500 | -4.68044400 | 1.58818300  |
| C | -3.02144300 | -4.37219800 | -1.22220800 |
| C | -3.19705300 | -3.53663500 | -2.37098800 |
| C | -2.82246900 | 1.71994700  | 4.12190500  |
| C | -3.16898700 | 3.35160300  | 1.84401300  |
| C | -3.22174500 | 3.50277700  | 0.41868200  |
| C | -3.05249800 | 2.41007000  | -2.17701800 |
| C | -2.85442200 | 1.29364000  | -3.05624900 |
| C | -2.34249400 | -1.45968100 | -3.41057200 |
| C | -2.57008600 | 0.42461600  | 4.69029900  |
| C | -2.05589000 | -2.32983900 | 4.32484200  |
| C | -1.85752600 | -3.45589100 | 3.45375600  |
| C | -1.69140900 | -4.56351200 | 0.85534900  |
| C | -1.74422300 | -4.40812500 | -0.57280500 |
| C | -2.09054100 | -2.75527200 | -2.84017600 |
| C | -1.71990100 | 2.49382500  | 3.64375900  |
| C | -1.89644100 | 3.32547400  | 2.48900600  |
| C | -2.00595700 | 3.64440600  | -0.31524300 |
| C | -1.91908000 | 3.08288600  | -1.63208500 |
| C | -1.52225100 | 0.86809900  | -3.34066300 |
| C | -1.26269000 | -0.53122800 | -3.52337100 |
| C | -1.22357300 | -0.04533700 | 4.76912300  |
| C | -0.96307800 | -1.44477700 | 4.57863700  |
| C | -0.57294600 | -3.65916200 | 2.86316800  |
| C | -0.48763800 | -4.22423200 | 1.54566200  |
| C | -0.59143600 | -3.91794000 | -1.25840700 |
| C | -0.76828200 | -3.07460200 | -2.40601400 |
| C | -0.39037200 | 2.16861800  | 4.06535400  |
| C | -0.74128800 | 3.81457400  | 1.79551800  |
| C | -0.79771000 | 3.98460800  | 0.37669700  |
| C | -0.62740500 | 2.87483800  | -2.21414300 |
| C | -0.42570500 | 1.74749900  | -3.06706400 |
| C | 0.08731700  | -1.00162400 | -3.42870300 |



|   |             |             |             |
|---|-------------|-------------|-------------|
| C | -0.13937300 | 0.88516400  | 4.64232000  |
| C | 0.37166000  | -1.86173500 | 4.26804300  |
| C | 0.56765300  | -2.97881100 | 3.40006700  |
| C | 0.73466600  | -4.08856000 | 0.81200200  |
| C | 0.68271900  | -3.93735400 | -0.60661200 |
| C | 0.33688300  | -2.28541000 | -2.86072100 |
| C | 0.71519400  | 2.94776400  | 3.59130200  |
| C | 0.53655900  | 3.79045000  | 2.44457900  |
| C | 0.42732700  | 4.11895600  | -0.35679500 |
| C | 0.51252200  | 3.55393000  | -1.67320700 |
| C | 0.90984600  | 1.32073600  | -3.35376600 |
| C | 1.17127400  | -0.07419600 | -3.54304000 |
| C | 1.21245800  | 0.41535000  | 4.72346900  |
| C | 1.47157500  | -0.98155700 | 4.53017600  |
| C | 1.85797600  | -3.18473600 | 2.81327400  |
| C | 1.94230900  | -3.75005400 | 1.50098400  |
| C | 1.84029400  | -3.45513500 | -1.29632800 |
| C | 1.66454700  | -2.61453800 | -2.43984700 |
| C | 2.03944000  | 2.63201300  | 4.02405500  |
| C | 1.68894600  | 4.28569500  | 1.76039900  |
| C | 1.63332500  | 4.45251900  | 0.33450000  |
| C | 1.79961300  | 3.34323700  | -2.25466000 |
| C | 2.00140700  | 2.20583700  | -3.10783700 |
| C | 2.51429600  | -0.54700600 | -3.46927300 |
| C | 2.29259700  | 1.34222700  | 4.60185100  |
| C | 2.80171300  | -1.40675800 | 4.23741900  |
| C | 2.99709400  | -2.52634400 | 3.36319000  |
| C | 3.16228600  | -3.63432100 | 0.77171700  |
| C | 3.11246800  | -3.49249100 | -0.65327500 |
| C | 2.76636900  | -1.84498400 | -2.91388400 |
| C | 3.14404000  | 3.41568600  | 3.55700100  |
| C | 2.96694000  | 4.25175300  | 2.40944300  |
| C | 2.86035300  | 4.57266500  | -0.39724600 |
| C | 2.94427300  | 4.01101000  | -1.71023100 |
| C | 3.33725600  | 1.77665900  | -3.39908300 |
| C | 3.59695500  | 0.38291200  | -3.57940600 |

|   |            |             |             |
|---|------------|-------------|-------------|
| C | 3.64364000 | 0.86939600  | 4.67770900  |
| C | 3.90172500 | -0.52506600 | 4.49410600  |
| C | 4.28642200 | -2.73445700 | 2.77439500  |
| C | 4.36910400 | -3.29327400 | 1.46225400  |
| C | 4.26923200 | -3.00857600 | -1.34379900 |
| C | 4.09443000 | -2.17448000 | -2.49027500 |
| C | 4.47470000 | 3.09398400  | 3.98828300  |
| C | 4.12585300 | 4.74419800  | 1.72137200  |
| C | 4.07194600 | 4.90520200  | 0.29562900  |
| C | 4.23643200 | 3.79955100  | -2.29842700 |
| C | 4.43562600 | 2.66674700  | -3.15858600 |
| C | 4.94808200 | -0.09121600 | -3.51226800 |
| C | 4.72873000 | 1.79953100  | 4.55559900  |
| C | 5.23873000 | -0.95626800 | 4.20285600  |
| C | 5.43447700 | -2.08070100 | 3.33124400  |
| C | 5.59774100 | -3.18626500 | 0.73293900  |
| C | 5.54694200 | -3.04150000 | -0.69445100 |
| C | 5.20131300 | -1.39271200 | -2.95892400 |
| C | 5.57643500 | 3.87165400  | 3.51961300  |
| C | 5.39904000 | 4.71070400  | 2.36696100  |
| C | 5.29345300 | 5.02446000  | -0.43420200 |
| C | 5.37724100 | 4.46229300  | -1.75365800 |
| C | 5.76672000 | 2.23841600  | -3.44776300 |
| C | 6.02707900 | 0.83620200  | -3.62724200 |
| C | 6.07421600 | 1.32689500  | 4.62851700  |
| C | 6.33385200 | -0.07483800 | 4.44973300  |
| C | 6.71845000 | -2.29125200 | 2.74419800  |
| C | 6.80127000 | -2.85404400 | 1.42428400  |
| C | 6.70070300 | -2.55716500 | -1.38046700 |
| C | 6.52465400 | -1.71660600 | -2.53297100 |
| C | 6.90727500 | 3.53765900  | 3.93157300  |
| C | 6.55907700 | 5.18492000  | 1.67328400  |
| C | 6.50590500 | 5.34242300  | 0.25841100  |
| C | 6.66976300 | 4.24003100  | -2.32997500 |
| C | 6.86648200 | 3.11772200  | -3.18559500 |
| C | 7.37750800 | 0.36743100  | -3.53500000 |

|   |             |             |             |
|---|-------------|-------------|-------------|
| C | 7.15886300  | 2.25167200  | 4.49043100  |
| C | 7.66751900  | -0.49743200 | 4.14163500  |
| C | 7.86195700  | -1.61712600 | 3.28200800  |
| C | 8.02523000  | -2.72228000 | 0.69219700  |
| C | 7.97383000  | -2.57052300 | -0.72384500 |
| C | 7.62851100  | -0.92142400 | -2.98136400 |
| C | 8.02081600  | 4.32388200  | 3.47377800  |
| C | 7.84291700  | 5.16558200  | 2.32080100  |
| C | 7.73751200  | 5.47657400  | -0.47185900 |
| C | 7.82126900  | 4.91350200  | -1.79316600 |
| C | 8.20955100  | 2.69776600  | -3.48236600 |
| C | 8.47027300  | 1.29388200  | -3.66028500 |
| C | 8.51663900  | 1.78529100  | 4.57481500  |
| C | 8.77645100  | 0.38152100  | 4.39666900  |
| C | 9.16085400  | -1.83221100 | 2.70359900  |
| C | 9.24405800  | -2.39638000 | 1.38237200  |
| C | 9.14197300  | -2.09033800 | -1.41134800 |
| C | 8.96553400  | -1.24743100 | -2.56407500 |
| C | 9.33975500  | 4.03057900  | 3.93709300  |
| C | 8.98699000  | 5.69996800  | 1.65326500  |
| C | 8.93263200  | 5.86042300  | 0.20955700  |
| C | 9.09853900  | 4.74450800  | -2.40990300 |
| C | 9.29922400  | 3.59945900  | -3.28278100 |
| C | 9.81633700  | 0.81672500  | -3.63307000 |
| C | 9.59633200  | 2.71757300  | 4.50544000  |
| C | 10.11131200 | -0.06513800 | 4.15406600  |
| C | 10.31000900 | -1.20991700 | 3.28047000  |
| C | 10.47507100 | -2.32709000 | 0.66126200  |
| C | 10.42208800 | -2.16754800 | -0.78263500 |
| C | 10.07232900 | -0.49703100 | -3.06585400 |
| C | 10.39162900 | 4.88905100  | 3.48604100  |
| C | 10.22041900 | 5.69894500  | 2.37824900  |
| C | 10.10841300 | 6.02945700  | -0.58771900 |
| C | 10.18883600 | 5.48822600  | -1.85787600 |
| C | 10.60141200 | 3.13510100  | -3.65088200 |
| C | 10.85214500 | 1.78566100  | -3.82053300 |

|   |             |             |             |
|---|-------------|-------------|-------------|
| C | 10.91858500 | 2.19117500  | 4.65230800  |
| C | 11.16826200 | 0.84167900  | 4.48182200  |
| C | 11.57723900 | -1.51304400 | 2.68973700  |
| C | 11.65712600 | -2.05459400 | 1.41971100  |
| C | 11.54759800 | -1.72251500 | -1.54567600 |
| C | 11.37795300 | -0.91194400 | -2.65319100 |
| H | 11.38392000 | 4.80806800  | 3.92806200  |
| H | 11.08289800 | 6.23228600  | 1.98041500  |
| H | 11.00317100 | 6.46734800  | -0.14700300 |
| H | 11.14460600 | 5.51608800  | -2.37970500 |
| H | 11.44031000 | 3.82985500  | -3.66426400 |
| H | 11.88117600 | 1.45755300  | -3.96223400 |
| H | 11.76285100 | 2.87069100  | 4.76197200  |
| H | 12.20184200 | 0.49830600  | 4.46276900  |
| H | 12.49462600 | -1.19102100 | 3.18093900  |
| H | 12.63511200 | -2.14272300 | 0.94811100  |
| H | 12.55691000 | -1.90308800 | -1.17788300 |
| H | 12.25860000 | -0.47776400 | -3.12498600 |

**(7,7)@Cycle-8**

|   |             |             |             |
|---|-------------|-------------|-------------|
| C | -0.19309800 | -0.30686900 | -7.27087600 |
| C | 2.15985500  | -0.85295900 | -7.19181100 |
| C | 0.10910100  | 1.06126100  | -7.25394000 |
| H | -1.23856000 | -0.62047000 | -7.26762800 |
| C | 2.46104000  | 0.51538500  | -7.16372000 |
| H | 2.95766100  | -1.58974600 | -7.11870300 |
| H | -0.69304700 | 1.79660500  | -7.22711800 |
| H | 3.50269000  | 0.82818900  | -7.07402500 |
| C | 0.72407900  | 8.05564700  | -1.74571600 |
| C | 2.38442700  | 9.23697700  | -3.20862300 |
| C | 1.58598700  | 8.14682800  | -2.94351500 |
| C | 1.40237500  | 7.02988600  | -3.89314100 |
| C | 2.47374800  | 6.44799600  | -4.59190400 |
| C | -0.06757900 | 5.39013400  | -4.94072700 |
| C | 2.30319800  | 5.37420600  | -5.47427700 |
| H | 3.48561600  | 6.80667600  | -4.40814200 |

|   |             |             |             |
|---|-------------|-------------|-------------|
| H | -1.01890600 | 4.87254600  | -5.01761200 |
| H | 3.17287300  | 4.96005500  | -5.97806600 |
| C | 1.44308800  | 1.48794500  | -7.15155700 |
| C | 1.02259400  | 4.81933000  | -5.62842300 |
| C | 1.83346600  | 2.94066100  | -6.92990000 |
| H | 2.13400300  | 3.43903600  | -7.87046500 |
| H | 2.70143100  | 2.94904700  | -6.25137100 |
| O | 0.74097300  | 3.67395700  | -6.34130700 |
| C | 0.08868400  | 6.48571300  | -4.07013200 |
| C | -1.02255200 | 7.06375200  | -3.26341200 |
| C | -2.31678300 | 7.15756100  | -3.74154800 |
| S | -2.84056700 | 6.61489800  | -5.37563200 |
| S | -3.67192900 | 7.93105700  | -2.84724500 |
| C | -4.46400800 | 7.28105200  | -5.30256300 |
| H | -5.09144700 | 7.16018000  | -6.18332400 |
| C | -4.84172500 | 7.87764800  | -4.15600300 |
| H | -5.82118000 | 8.31216800  | -3.96686200 |
| S | 3.28654100  | 9.46560600  | -4.74962200 |
| C | 3.32373900  | 11.71004500 | -3.31102400 |
| H | 3.51869000  | 12.73943500 | -3.01670500 |
| S | 2.53227900  | 10.67033000 | -2.13073300 |
| C | 3.66562300  | 11.16614200 | -4.49466100 |
| H | 4.17806200  | 11.68933000 | -5.29954400 |
| C | 0.31860100  | 8.39813700  | 0.65528100  |
| C | -0.61159600 | 7.56534000  | -1.92283300 |
| C | -1.43416900 | 7.53602900  | -0.77953700 |
| H | -2.42441200 | 7.09436200  | -0.84243100 |
| C | -1.00354200 | 7.95430500  | 0.48817200  |
| H | -1.68077800 | 7.86924300  | 1.33546200  |
| C | 1.17273400  | 8.42109800  | -0.46682900 |
| H | 2.21142100  | 8.70443600  | -0.30663400 |
| O | 0.88763000  | 8.82115300  | 1.82687400  |
| C | 1.76008200  | -7.92495500 | 0.66346500  |
| C | 2.63835900  | -7.43965800 | -2.01106000 |
| C | 0.84647300  | -7.93844900 | -0.40833400 |
| H | -0.21192700 | -8.03144700 | -0.17257100 |

|   |             |              |             |
|---|-------------|--------------|-------------|
| C | 3.12633200  | -7.74156700  | 0.38798800  |
| H | 3.85900900  | -7.71294100  | 1.19126600  |
| C | 3.53565700  | -7.47069300  | -0.92537400 |
| H | 4.57474100  | -7.18791100  | -1.07532100 |
| C | 1.26550500  | -7.74196400  | -1.73412600 |
| C | 0.32777900  | -7.79210700  | -2.87807700 |
| C | 3.01346500  | -7.03748600  | -3.39180800 |
| C | 1.93354600  | -6.34371900  | -4.14492000 |
| C | 0.58288800  | -6.76077200  | -3.90499800 |
| C | 2.16529900  | -5.28015500  | -5.03868200 |
| H | 3.15799200  | -4.84816500  | -5.13841600 |
| C | -0.44627000 | -6.12934200  | -4.62313300 |
| H | -1.48289900 | -6.38506600  | -4.41146400 |
| C | -0.20162400 | -5.11388100  | -5.55489800 |
| H | -1.04680800 | -4.66316400  | -6.06807300 |
| C | 1.10993100  | -4.64146500  | -5.72346000 |
| O | 1.45547600  | -3.52033600  | -6.44872700 |
| C | 0.82182500  | -1.27999300  | -7.19907300 |
| C | 0.40410500  | -2.73347900  | -7.04329000 |
| C | 4.22916200  | -7.34718500  | -3.96902800 |
| C | -0.61677300 | -8.78679400  | -3.01162300 |
| S | 4.68346500  | -6.93148400  | -5.66008500 |
| S | 5.50364500  | -8.33327900  | -3.16948300 |
| S | -0.86693500 | -10.10383500 | -1.81149000 |
| S | -1.64349100 | -9.01359700  | -4.47159700 |
| C | 6.49759500  | -8.57039500  | -4.60043200 |
| H | 7.37718000  | -9.20263500  | -4.49723500 |
| C | 6.12521300  | -7.93603500  | -5.72841400 |
| H | 6.65831100  | -7.97832900  | -6.67611700 |
| C | -2.21942800 | -10.62315000 | -4.05122100 |
| H | -2.85127200 | -11.13212100 | -4.77634100 |
| C | -1.86706000 | -11.11527600 | -2.84816200 |
| H | -2.17177700 | -12.08333100 | -2.45540800 |
| H | 0.12219600  | -3.18774500  | -8.01114500 |
| H | -0.48614000 | -2.73915200  | -6.39585700 |
| O | 1.21288500  | -8.03791600  | 1.91532000  |

|   |             |             |            |
|---|-------------|-------------|------------|
| C | 2.00357900  | -7.62951500 | 3.05933400 |
| H | 2.59780100  | -6.74352000 | 2.79228000 |
| H | 2.70079800  | -8.43968700 | 3.33710300 |
| C | 1.04208400  | -7.27990400 | 4.20383300 |
| H | 0.53795500  | -8.18983600 | 4.56483800 |
| H | 0.26310500  | -6.63027600 | 3.78111400 |
| C | 1.73831700  | -6.53364100 | 5.37015900 |
| H | 2.33769600  | -7.23585500 | 5.97347000 |
| H | 2.44783600  | -5.80490000 | 4.94866100 |
| C | 0.73935200  | -5.76460400 | 6.27023000 |
| H | 0.15073900  | -6.47420700 | 6.87600300 |
| H | 0.01897000  | -5.25308200 | 5.61487300 |
| C | 1.39725600  | -4.70357200 | 7.18468300 |
| H | 1.93596200  | -5.19387300 | 8.01372800 |
| H | 2.15804600  | -4.16123000 | 6.60195600 |
| C | 0.39320200  | -3.67152000 | 7.74663600 |
| H | -0.32179000 | -4.17128700 | 8.42325700 |
| H | -0.20462900 | -3.27266700 | 6.91286000 |
| C | 1.06297000  | -2.49467700 | 8.48966800 |
| H | 1.54694300  | -2.86924000 | 9.40822200 |
| H | 1.86569600  | -2.07358900 | 7.86313300 |
| C | 0.06706500  | -1.35829000 | 8.85583700 |
| H | -0.83125700 | -1.82633800 | 9.30058500 |
| H | -0.26218900 | -0.86016000 | 7.93301700 |
| C | 0.13943200  | 8.79298400  | 3.06651500 |
| H | 0.68837700  | 9.49028900  | 3.71561900 |
| H | -0.87467400 | 9.19731100  | 2.90732800 |
| C | 0.11191700  | 7.39169900  | 3.69209400 |
| H | -0.64459800 | 6.77377700  | 3.18829000 |
| H | 1.08388100  | 6.92325100  | 3.47781900 |
| C | -0.11554900 | 7.34555300  | 5.22489400 |
| H | -1.06154100 | 7.84366600  | 5.49821800 |
| H | 0.69621700  | 7.89872200  | 5.72847900 |
| C | -0.12239400 | 5.86953300  | 5.67585700 |
| H | -1.01458000 | 5.38824400  | 5.24916400 |
| H | 0.73756400  | 5.38399100  | 5.18961100 |

|   |             |             |             |
|---|-------------|-------------|-------------|
| C | -0.05534400 | 5.50616300  | 7.17952200  |
| H | -0.98143500 | 5.80760900  | 7.69811400  |
| H | 0.77791700  | 6.04157200  | 7.66692600  |
| C | 0.16455500  | 3.97724100  | 7.27930400  |
| H | -0.63163000 | 3.48181600  | 6.70162900  |
| H | 1.10072100  | 3.75333500  | 6.74450500  |
| C | 0.24895600  | 3.28320900  | 8.65260300  |
| H | -0.69824300 | 3.38959700  | 9.20750500  |
| H | 1.03769600  | 3.74659100  | 9.27065400  |
| C | 0.57819700  | 1.78113700  | 8.43484000  |
| H | 1.48403500  | 1.73912500  | 7.80331200  |
| H | -0.21822200 | 1.32340000  | 7.82953500  |
| C | 0.82946800  | 0.96407800  | 9.68165300  |
| C | 0.63131900  | -0.35998500 | 9.84334800  |
| H | 0.91898800  | -0.79429500 | 10.80771200 |
| H | 1.26886000  | 1.51356400  | 10.52194000 |
| H | 11.88898700 | -0.89897300 | -4.07630600 |
| H | 11.80110000 | 1.52568200  | -4.12089400 |
| H | 11.70934800 | 3.44448600  | -3.24260500 |
| H | 11.60232800 | 4.99954600  | -1.38224600 |
| H | 11.52452800 | 5.51725000  | 0.66770500  |
| H | 11.47495600 | 5.01656200  | 3.04226500  |
| H | 11.47574300 | 3.72883800  | 4.71720800  |
| H | 11.53154400 | 1.56155800  | 5.80844900  |
| H | 11.93455200 | -2.78726700 | -3.12979200 |
| H | 11.93940000 | -4.27138800 | -1.20949700 |
| H | 11.90087700 | -4.70480300 | 0.85886000  |
| H | 11.81899100 | -4.11536100 | 3.21173000  |
| H | 11.72803300 | -2.75604000 | 4.82857200  |
| H | 11.61671300 | -0.55071000 | 5.83504600  |
| C | 10.91563100 | -0.41159100 | -4.04178100 |
| C | 10.86554800 | 0.97072000  | -4.06705000 |
| C | 10.73425300 | 3.69385400  | -2.82653200 |
| C | 10.67333400 | 4.58060000  | -1.76646200 |
| C | 10.56447800 | 5.30690100  | 1.13702100  |
| C | 10.53618900 | 5.02122200  | 2.49021800  |



|   |             |             |             |
|---|-------------|-------------|-------------|
| C | 10.53863400 | 3.19311900  | 4.86175600  |
| C | 10.57051600 | 1.95795000  | 5.48378200  |
| C | 10.97986600 | -3.08908600 | -2.70123500 |
| C | 10.98266400 | -3.93525000 | -1.60679200 |
| C | 10.92864900 | -4.54696000 | 1.32364500  |
| C | 10.88205100 | -4.21064900 | 2.66475400  |
| C | 10.75175800 | -2.29204600 | 4.96156800  |
| C | 10.68831600 | -1.03482900 | 5.53538400  |
| C | 9.73881500  | -1.19015000 | -3.81810500 |
| C | 9.63526100  | 1.66984400  | -3.87022200 |
| C | 9.57151500  | 2.99234300  | -3.27087300 |
| C | 9.44525700  | 4.82680200  | -1.07905300 |
| C | 9.39253300  | 5.17768500  | 0.33012600  |
| C | 9.33433900  | 4.58454700  | 3.12784100  |
| C | 9.33559700  | 3.69575600  | 4.27748500  |
| C | 9.40103100  | 1.14147900  | 5.56523400  |
| C | 9.76994800  | -2.49041000 | -3.16927400 |
| C | 9.77551200  | -4.23985100 | -0.90574300 |
| C | 9.74931000  | -4.53540200 | 0.51711700  |
| C | 9.65261100  | -3.84017200 | 3.29127800  |
| C | 9.58944500  | -2.91109600 | 4.40727800  |
| C | 9.45821300  | -0.31041200 | 5.59406000  |
| C | 8.48198200  | -0.52557800 | -3.96238100 |
| C | 8.42983700  | 0.91136700  | -3.98847300 |
| C | 8.30564800  | 3.48432800  | -2.82637900 |
| C | 8.24224200  | 4.40765800  | -1.72612200 |
| C | 8.14023100  | 5.08653700  | 1.01213100  |
| C | 8.11103800  | 4.78524500  | 2.41741100  |
| C | 8.11392700  | 3.05566000  | 4.65108200  |
| C | 8.14701800  | 1.77313400  | 5.29967600  |
| C | 8.54262600  | -3.05454600 | -2.70317200 |
| C | 8.54550500  | -3.93400200 | -1.56555300 |
| C | 8.49458600  | -4.50715700 | 1.20024800  |
| C | 8.44616800  | -4.15784200 | 2.59442400  |
| C | 8.32305400  | -2.35552000 | 4.76686100  |
| C | 8.25715900  | -1.04881900 | 5.36273300  |

|   |            |             |             |
|---|------------|-------------|-------------|
| C | 7.25763200 | -1.26465000 | -3.81454500 |
| C | 7.15495200 | 1.56477100  | -3.86616900 |
| C | 7.09201800 | 2.86336800  | -3.28271000 |
| C | 6.96760400 | 4.68191000  | -1.12041900 |
| C | 6.91617000 | 5.02325400  | 0.26135700  |
| C | 6.85879800 | 4.42329700  | 3.02415900  |
| C | 6.86035300 | 3.54945500  | 4.14913800  |
| C | 6.92507800 | 1.02738700  | 5.43046900  |
| C | 7.28812500 | -2.54134000 | -3.18222500 |
| C | 7.29369400 | -4.27029800 | -0.94379900 |
| C | 7.26809200 | -4.55635900 | 0.45176500  |
| C | 7.17247800 | -3.87198600 | 3.19688800  |
| C | 7.11019200 | -2.96572200 | 4.29432500  |
| C | 6.98082700 | -0.39538900 | 5.46626500  |
| C | 5.99955500 | -0.61555900 | -4.02658100 |
| C | 5.94737900 | 0.81891900  | -4.05262400 |
| C | 5.82265500 | 3.40125500  | -2.89525100 |
| C | 5.75906400 | 4.32761600  | -1.80088200 |
| C | 5.65707500 | 5.00404600  | 0.94264900  |
| C | 5.62836500 | 4.69280000  | 2.34343000  |
| C | 5.63131100 | 2.95326100  | 4.57790800  |
| C | 5.66421600 | 1.67593100  | 5.23195300  |
| C | 6.06057800 | -3.15218600 | -2.77069200 |
| C | 6.06338800 | -4.02896300 | -1.63491100 |
| C | 6.01195500 | -4.59410100 | 1.13729000  |
| C | 5.96374300 | -4.24914600 | 2.52953700  |
| C | 5.84035000 | -2.45392700 | 4.71328600  |
| C | 5.77466700 | -1.15005400 | 5.30878600  |
| C | 4.78747300 | -1.35766200 | -3.88878300 |
| C | 4.68435100 | 1.47585600  | -3.94056300 |
| C | 4.62031300 | 2.78515900  | -3.35692900 |
| C | 4.49576500 | 4.61890900  | -1.20135300 |
| C | 4.44413000 | 4.96311100  | 0.19026000  |
| C | 4.38712000 | 4.34021700  | 2.95487900  |
| C | 4.38914600 | 3.45518900  | 4.08400000  |
| C | 4.45412200 | 0.93342300  | 5.38392900  |

|   |            |             |             |
|---|------------|-------------|-------------|
| C | 4.81772300 | -2.64293100 | -3.25410100 |
| C | 4.82403500 | -4.37163700 | -1.01567300 |
| C | 4.79836500 | -4.64890900 | 0.38915900  |
| C | 4.70250400 | -3.97330700 | 3.13809300  |
| C | 4.63905200 | -3.06892200 | 4.24763000  |
| C | 4.50988500 | -0.49869800 | 5.42801200  |
| C | 3.52810000 | -0.70266100 | -4.07760800 |
| C | 3.47640400 | 0.72303900  | -4.10168400 |
| C | 3.35047400 | 3.31056000  | -2.95148200 |
| C | 3.28645300 | 4.24327100  | -1.87248200 |
| C | 3.18355700 | 4.92508000  | 0.87324400  |
| C | 3.15660500 | 4.60054900  | 2.26549000  |
| C | 3.16054600 | 2.84277800  | 4.49895600  |
| C | 3.19229800 | 1.57608600  | 5.16010200  |
| C | 3.58747300 | -3.23595500 | -2.81900500 |
| C | 3.59070600 | -4.11409100 | -1.69609100 |
| C | 3.54077800 | -4.66401000 | 1.07273300  |
| C | 3.49265400 | -4.32373100 | 2.45498800  |
| C | 3.36690800 | -2.54477200 | 4.65039100  |
| C | 3.30213600 | -1.25269800 | 5.25404700  |
| C | 2.31306900 | -1.44136000 | -3.92866500 |
| C | 2.21071300 | 1.37651600  | -3.97995700 |
| C | 2.14698300 | 2.68102700  | -3.40128400 |
| C | 2.01943100 | 4.52910500  | -1.27059400 |
| C | 1.96709600 | 4.87313400  | 0.11822700  |
| C | 1.91404300 | 4.22589400  | 2.86952500  |
| C | 1.91708300 | 3.33070700  | 3.98670100  |
| C | 1.97913300 | 0.82880100  | 5.30436300  |
| C | 2.34105300 | -2.71536000 | -3.28757900 |
| C | 2.34894100 | -4.45728200 | -1.07398600 |
| C | 2.32301200 | -4.73303000 | 0.32638000  |
| C | 2.22478300 | -4.04858600 | 3.05909400  |
| C | 2.16150500 | -3.14849800 | 4.16669000  |
| C | 2.03273700 | -0.60009500 | 5.36435100  |
| C | 1.05973100 | -0.79309600 | -4.12966900 |
| C | 1.00808300 | 0.63123100  | -4.15326500 |

|   |             |             |             |
|---|-------------|-------------|-------------|
| C | 0.88152200  | 3.20124900  | -3.00477600 |
| C | 0.81672000  | 4.14099600  | -1.93358600 |
| C | 0.71256400  | 4.81261000  | 0.79732100  |
| C | 0.68751000  | 4.47470900  | 2.18496700  |
| C | 0.69483300  | 2.71465200  | 4.38720600  |
| C | 0.72414100  | 1.46011300  | 5.06186400  |
| C | 1.11664200  | -3.30905300 | -2.86078800 |
| C | 1.11984700  | -4.20237500 | -1.74973100 |
| C | 1.07192200  | -4.77541400 | 1.00745300  |
| C | 1.02186000  | -4.42170400 | 2.38972500  |
| C | 0.89398300  | -2.63578700 | 4.57021300  |
| C | 0.82887900  | -1.34667000 | 5.18092200  |
| C | -0.15580100 | -1.53276600 | -3.98876100 |
| C | -0.25786800 | 1.28540200  | -4.04866500 |
| C | -0.32125800 | 2.58209200  | -3.46962400 |
| C | -0.45260700 | 4.41188700  | -1.33312100 |
| C | -0.50412500 | 4.73839500  | 0.04968100  |
| C | -0.55350000 | 4.10075000  | 2.78916200  |
| C | -0.55054700 | 3.21369800  | 3.89940400  |
| C | -0.49335600 | 0.72760100  | 5.22863000  |
| C | -0.12704800 | -2.80328400 | -3.34678900 |
| C | -0.12153400 | -4.55746700 | -1.13400900 |
| C | -0.14638400 | -4.85286500 | 0.26024700  |
| C | -0.24633300 | -4.15447500 | 2.99721100  |
| C | -0.31047700 | -3.24806800 | 4.09559700  |
| C | -0.44156600 | -0.69590800 | 5.28782300  |
| C | -1.41257500 | -0.88789100 | -4.21526700 |
| C | -1.46432800 | 0.54255500  | -4.24648500 |
| C | -1.59321000 | 3.12398000  | -3.10082600 |
| C | -1.65952100 | 4.05079400  | -2.01267300 |
| C | -1.76181800 | 4.69533500  | 0.73054600  |
| C | -1.78801400 | 4.38234100  | 2.12421100  |
| C | -1.78055100 | 2.64127000  | 4.35285400  |
| C | -1.75228800 | 1.37677300  | 5.02316500  |
| C | -1.35483000 | -3.41370100 | -2.93885300 |
| C | -1.35209000 | -4.30470800 | -1.81863100 |

|   |             |             |             |
|---|-------------|-------------|-------------|
| C | -1.40246900 | -4.90203700 | 0.94558700  |
| C | -1.45359500 | -4.54890400 | 2.33470000  |
| C | -1.58325800 | -2.74523400 | 4.51676400  |
| C | -1.64981000 | -1.44677500 | 5.11905400  |
| C | -2.62400800 | -1.63276200 | -4.08795700 |
| C | -2.72718300 | 1.20187900  | -4.15873200 |
| C | -2.79289900 | 2.51323200  | -3.57897900 |
| C | -2.92449000 | 4.32950500  | -1.41324600 |
| C | -2.97606700 | 4.65280000  | -0.01736400 |
| C | -3.02710000 | 4.04272300  | 2.74835300  |
| C | -3.02346300 | 3.16175200  | 3.88034300  |
| C | -2.96675500 | 0.64249300  | 5.18426900  |
| C | -2.59382900 | -2.91434100 | -3.44020400 |
| C | -2.59148200 | -4.66272000 | -1.20729900 |
| C | -2.61756100 | -4.96627900 | 0.19556800  |
| C | -2.71726300 | -4.28094300 | 2.94559700  |
| C | -2.78277700 | -3.36623400 | 4.05023700  |
| C | -2.91440500 | -0.79093100 | 5.22858600  |
| C | -3.88184400 | -0.98002200 | -4.29851000 |
| C | -3.93394800 | 0.44934100  | -4.33598600 |
| C | -4.06482900 | 3.04176200  | -3.18500800 |
| C | -4.13079900 | 3.95839800  | -2.08961400 |
| C | -4.23200000 | 4.61280200  | 0.66905300  |
| C | -4.25818900 | 4.30506900  | 2.06552700  |
| C | -4.25294200 | 2.56612500  | 4.31155500  |
| C | -4.22389100 | 1.29423300  | 4.96510600  |
| C | -3.82316700 | -3.51715800 | -3.01963100 |
| C | -3.82176000 | -4.39787000 | -1.89248200 |
| C | -3.87522300 | -4.99434400 | 0.88146800  |
| C | -3.92564700 | -4.65125100 | 2.26902600  |
| C | -4.05461000 | -2.84123100 | 4.45154400  |
| C | -4.12084900 | -1.54094000 | 5.04325200  |
| C | -5.09929100 | -1.72489600 | -4.15765000 |
| C | -5.20355400 | 1.10850700  | -4.23313600 |
| C | -5.26951900 | 2.41843800  | -3.65167000 |
| C | -5.39963200 | 4.23095700  | -1.47901600 |

|   |             |             |             |
|---|-------------|-------------|-------------|
| C | -5.45092000 | 4.56283200  | -0.08447700 |
| C | -5.50272800 | 3.95403500  | 2.68503100  |
| C | -5.50006700 | 3.07626400  | 3.81949000  |
| C | -5.44231400 | 0.55182200  | 5.10881000  |
| C | -5.06951100 | -3.00562300 | -3.51182600 |
| C | -5.06768100 | -4.74612700 | -1.27431400 |
| C | -5.09465200 | -5.04811100 | 0.12739800  |
| C | -5.19488800 | -4.37355500 | 2.87692100  |
| C | -5.26009500 | -3.45856400 | 3.97928300  |
| C | -5.38996500 | -0.88075500 | 5.14730200  |
| C | -6.35408400 | -1.07560700 | -4.36351000 |
| C | -6.40686400 | 0.35797400  | -4.40205400 |
| C | -6.53749700 | 2.93845800  | -3.25047800 |
| C | -6.60324700 | 3.85639500  | -2.14916200 |
| C | -6.70354800 | 4.51599000  | 0.59934200  |
| C | -6.72994500 | 4.20807500  | 2.00086900  |
| C | -6.72589700 | 2.47682100  | 4.23982400  |
| C | -6.69642500 | 1.19895600  | 4.89149200  |
| C | -6.29575800 | -3.60119300 | -3.08794600 |
| C | -6.29463600 | -4.48182500 | -1.95512700 |
| C | -6.34888300 | -5.07724500 | 0.80879900  |
| C | -6.39964900 | -4.73683600 | 2.20149200  |
| C | -6.52757400 | -2.93254200 | 4.37448700  |
| C | -6.59336000 | -1.62665200 | 4.96473900  |
| C | -7.57080000 | -1.81466400 | -4.21178200 |
| C | -7.67534600 | 1.01124600  | -4.28591900 |
| C | -7.74092900 | 2.31007800  | -3.70496600 |
| C | -7.87013400 | 4.11610700  | -1.53472800 |
| C | -7.92079700 | 4.44910800  | -0.15077700 |
| C | -7.97295600 | 3.84695300  | 2.61237500  |
| C | -7.97092600 | 2.97573500  | 3.73914500  |
| C | -7.91262600 | 0.45534200  | 5.02191100  |
| C | -7.54143900 | -3.08539800 | -3.56929800 |
| C | -7.53959800 | -4.81871900 | -1.33442200 |
| C | -7.56685500 | -5.11915400 | 0.05725500  |
| C | -7.66743000 | -4.44940400 | 2.80142300  |

|   |              |             |             |
|---|--------------|-------------|-------------|
| C | -7.73188100  | -3.54063400 | 3.89577900  |
| C | -7.86060500  | -0.96725700 | 5.05870300  |
| C | -8.83682600  | -1.17128900 | -4.43482000 |
| C | -8.88995100  | 0.26484700  | -4.47212300 |
| C | -9.02047300  | 2.83769100  | -3.31576100 |
| C | -9.08621500  | 3.75585200  | -2.21153900 |
| C | -9.18621900  | 4.41929200  | 0.53090700  |
| C | -9.21280700  | 4.11423000  | 1.93552800  |
| C | -9.20894500  | 2.38626600  | 4.17107700  |
| C | -9.17927800  | 1.10528300  | 4.82273400  |
| C | -8.77853000  | -3.69151900 | -3.15865400 |
| C | -8.77757700  | -4.57217800 | -2.02246100 |
| C | -8.83212500  | -5.16680300 | 0.73767500  |
| C | -8.88323700  | -4.82671600 | 2.13328900  |
| C | -9.01062300  | -3.02507900 | 4.30297600  |
| C | -9.07617400  | -1.71648300 | 4.89397700  |
| C | -10.04688900 | -1.92706400 | -4.35274900 |
| C | -10.15289200 | 0.93164600  | -4.42524000 |
| C | -10.22012600 | 2.25520400  | -3.82884600 |
| C | -10.35072200 | 4.08119300  | -1.63102500 |
| C | -10.40217200 | 4.42335100  | -0.21953500 |
| C | -10.45519300 | 3.81937800  | 2.57694500  |
| C | -10.45319600 | 2.93059300  | 3.72675200  |
| C | -10.39384200 | 0.37957000  | 5.02284700  |
| C | -10.01698100 | -3.22300000 | -3.69575800 |
| C | -10.01518500 | -4.97445300 | -1.43245700 |
| C | -10.04323100 | -5.28032700 | -0.01207800 |
| C | -10.14517400 | -4.60342700 | 2.76516900  |
| C | -10.21073100 | -3.67611900 | 3.88199300  |
| C | -10.34077100 | -1.07222700 | 5.05941000  |
| C | -11.26413500 | -1.23987900 | -4.64815000 |
| C | -11.31541300 | 0.14215100  | -4.68291200 |
| C | -11.45409600 | 2.86811500  | -3.45015600 |
| C | -11.51735300 | 3.75108500  | -2.38705600 |
| C | -11.62336500 | 4.45925200  | 0.52125300  |
| C | -11.64893300 | 4.16763400  | 1.87334400  |

|   |              |             |             |
|---|--------------|-------------|-------------|
| C | -11.64491700 | 2.33623100  | 4.24416700  |
| C | -11.61631100 | 1.10309900  | 4.87058300  |
| C | -11.20245100 | -3.91094300 | -3.29242400 |
| C | -11.20167900 | -4.75757900 | -2.19832100 |
| C | -11.25973200 | -5.38632400 | 0.72975700  |
| C | -11.30906400 | -5.05920800 | 2.07294700  |
| C | -11.44393900 | -3.14892700 | 4.37478800  |
| C | -11.50688300 | -1.88978500 | 4.94420800  |
| H | -12.19512000 | -1.79883400 | -4.73155500 |
| H | -12.28516400 | 0.62576500  | -4.79188900 |
| H | -12.38357600 | 2.55004700  | -3.92033700 |
| H | -12.49451800 | 4.09899100  | -2.05490700 |
| H | -12.56914200 | 4.60001600  | -0.00014900 |
| H | -12.61399300 | 4.08935900  | 2.37196500  |
| H | -12.61106800 | 2.79705600  | 4.04346600  |
| H | -12.56076700 | 0.63357500  | 5.14202100  |
| H | -12.15208000 | -3.68147400 | -3.77374600 |
| H | -12.15063900 | -5.16636900 | -1.85407400 |
| H | -12.19152600 | -5.61130800 | 0.21274100  |
| H | -12.27801800 | -5.03695200 | 2.56970500  |
| H | -12.37322100 | -3.68798600 | 4.19594300  |
| H | -12.48363300 | -1.47889000 | 5.19561500  |

**(8,8)@Cycle-8**

|   |             |             |             |
|---|-------------|-------------|-------------|
| C | -1.94728400 | -0.28980600 | -7.69818400 |
| C | 0.38350900  | -0.84078700 | -7.72788000 |
| C | -1.64590000 | 1.08916600  | -7.68209100 |
| H | -2.99734600 | -0.58368000 | -7.65084400 |
| C | 0.68379400  | 0.53712000  | -7.71889500 |
| H | 1.20037200  | -1.56147700 | -7.70650100 |
| H | -2.46223500 | 1.80863100  | -7.62417900 |
| H | 1.73475200  | 0.83005000  | -7.68846400 |
| C | 0.06571500  | 8.11159300  | -1.96255300 |
| C | 2.10286300  | 8.81754800  | -3.23896800 |
| C | 0.99877200  | 7.99445900  | -3.12157200 |
| C | 0.58026900  | 7.04297400  | -4.19279800 |



|   |             |             |             |
|---|-------------|-------------|-------------|
| C | 1.48842500  | 6.32209100  | -4.99575100 |
| C | -1.19709200 | 5.77660000  | -5.32586600 |
| C | 1.09923300  | 5.35066600  | -5.93414300 |
| H | 2.55695400  | 6.43517700  | -4.82852600 |
| H | -2.23922100 | 5.47213900  | -5.38878900 |
| H | 1.87795800  | 4.82052000  | -6.47757300 |
| C | -0.31282300 | 1.53826400  | -7.62309800 |
| C | -0.25735200 | 5.00223100  | -6.05757200 |
| C | 0.16397100  | 3.00724000  | -7.46193000 |
| H | 0.36756800  | 3.44921800  | -8.45334900 |
| H | 1.11314100  | 2.95808500  | -6.91068200 |
| O | -0.75583000 | 3.90483700  | -6.76370800 |
| C | -0.81549000 | 6.79845200  | -4.41456600 |
| C | -1.77694700 | 7.63001400  | -3.62723800 |
| C | -2.94933700 | 8.10158500  | -4.19103700 |
| S | -3.49509900 | 7.71749600  | -5.86208400 |
| S | -4.04659000 | 9.29072600  | -3.40357800 |
| C | -4.77222000 | 8.92302200  | -5.93821900 |
| H | -5.31190200 | 9.01800100  | -6.87833300 |
| C | -5.02306800 | 9.63575800  | -4.82366300 |
| H | -5.79690300 | 10.39421000 | -4.72371400 |
| S | 3.15386700  | 8.90948500  | -4.69681600 |
| C | 3.75783000  | 10.87884300 | -3.01016600 |
| H | 4.23425000  | 11.76045800 | -2.58592800 |
| S | 2.58239100  | 10.03935900 | -2.00749600 |
| C | 4.01806900  | 10.36800600 | -4.22847200 |
| H | 4.73638700  | 10.77152400 | -4.93925600 |
| C | -0.41516600 | 8.39622800  | 0.46507100  |
| C | -1.33363200 | 8.01326100  | -2.25029100 |
| C | -2.21639200 | 8.20644900  | -1.16364900 |
| H | -3.28615900 | 8.08555500  | -1.31402400 |
| C | -1.78811400 | 8.42610000  | 0.15565000  |
| H | -2.53328200 | 8.50744000  | 0.94415200  |
| C | 0.49262100  | 8.27339800  | -0.61903000 |
| H | 1.55064300  | 8.20474500  | -0.37690700 |
| O | 0.11833000  | 8.38999300  | 1.74509800  |

|   |             |              |             |
|---|-------------|--------------|-------------|
| C | -0.51748500 | -8.37467600  | 0.25299400  |
| C | 0.30321400  | -7.89292900  | -2.48049200 |
| C | -1.46304500 | -8.21362900  | -0.79393000 |
| H | -2.51163600 | -8.15266200  | -0.51178500 |
| C | 0.84225500  | -8.39775700  | -0.10800600 |
| H | 1.61628200  | -8.50951000  | 0.64854400  |
| C | 1.22326700  | -8.12856900  | -1.43402400 |
| H | 2.28722300  | -8.00199100  | -1.61646600 |
| C | -1.08575000 | -8.00310400  | -2.14448300 |
| C | -2.06138300 | -7.85644000  | -3.26368700 |
| C | 0.69357100  | -7.46854700  | -3.86192600 |
| C | -0.30004300 | -6.62094000  | -4.59182200 |
| C | -1.68628500 | -6.87597100  | -4.32373500 |
| C | 0.04183800  | -5.58025500  | -5.49807400 |
| H | 1.07955600  | -5.27144200  | -5.59752300 |
| C | -2.62710200 | -6.14247500  | -5.07633100 |
| H | -3.68797900 | -6.26421300  | -4.87114800 |
| C | -2.27758200 | -5.15265900  | -6.01087300 |
| H | -3.07868600 | -4.61427800  | -6.51201200 |
| C | -0.92868300 | -4.79378100  | -6.17578000 |
| O | -0.46345200 | -3.67395500  | -6.86849900 |
| C | -0.94820700 | -1.29158100  | -7.64939400 |
| C | -1.41020100 | -2.76791700  | -7.51940700 |
| C | 1.84681600  | -7.91831900  | -4.48156300 |
| C | -3.16557400 | -8.68282000  | -3.36343200 |
| S | 2.32463900  | -7.49201400  | -6.16318300 |
| S | 2.98240900  | -9.11632200  | -3.76581000 |
| S | -3.59105100 | -9.94345200  | -2.15161100 |
| S | -4.26884800 | -8.74112900  | -4.78346400 |
| C | 3.90658300  | -9.41985900  | -5.22946300 |
| H | 4.68993500  | -10.17325200 | -5.17654100 |
| C | 3.60754700  | -8.68365000  | -6.31650000 |
| H | 4.11179200  | -8.75134000  | -7.27839000 |
| C | -5.10364500 | -10.22047800 | -4.32785100 |
| H | -5.84409200 | -10.60940500 | -5.02390500 |
| C | -4.79515400 | -10.76427200 | -3.13531100 |

|   |             |              |             |
|---|-------------|--------------|-------------|
| H | -5.24866900 | -11.66212300 | -2.72011000 |
| H | -1.63067700 | -3.18396900  | -8.51826600 |
| H | -2.34711400 | -2.74393800  | -6.94633100 |
| O | -1.00878900 | -8.40497300  | 1.54942100  |
| C | -0.09365500 | -8.28223800  | 2.70154800  |
| H | 0.66385600  | -7.52567000  | 2.46663700  |
| H | 0.41966900  | -9.24846200  | 2.84032100  |
| C | -0.88048900 | -7.87493300  | 3.99607600  |
| H | -1.42403200 | -8.75442500  | 4.37487000  |
| H | -1.64254800 | -7.14682700  | 3.70096800  |
| C | -0.00651600 | -7.25120600  | 5.15947800  |
| H | 0.57485100  | -8.05207600  | 5.64585400  |
| H | 0.73336300  | -6.57080700  | 4.71715300  |
| C | -0.82173500 | -6.46065100  | 6.26419300  |
| H | -1.33236300 | -7.18818900  | 6.91716400  |
| H | -1.62008800 | -5.89880000  | 5.76311700  |
| C | 0.00772700  | -5.45447800  | 7.15815900  |
| H | 0.62858600  | -6.02984900  | 7.86570600  |
| H | 0.71382000  | -4.92155400  | 6.51108400  |
| C | -0.81988300 | -4.37478200  | 7.96109200  |
| H | -1.37580600 | -4.87250800  | 8.77368400  |
| H | -1.58476100 | -3.96014300  | 7.29137500  |
| C | 0.02161300  | -3.18441400  | 8.58352600  |
| H | 0.48402900  | -3.53378400  | 9.52248000  |
| H | 0.85490900  | -2.93841400  | 7.91093100  |
| C | -0.78353300 | -1.85533200  | 8.88932500  |
| H | -1.66991200 | -2.14571500  | 9.48560100  |
| H | -1.17491500 | -1.44394500  | 7.95741900  |
| C | -0.76079500 | 8.20262400   | 2.91642200  |
| H | -1.30157100 | 9.14631900   | 3.09951900  |
| H | -1.49840500 | 7.42893000   | 2.67739400  |
| C | 0.07438700  | 7.78419400   | 4.17325700  |
| H | 0.83670500  | 7.07306500   | 3.83764500  |
| H | 0.61945600  | 8.66442000   | 4.54864200  |
| C | -0.73778200 | 7.13353900   | 5.36857400  |
| H | -1.48992600 | 6.43965100   | 4.96749800  |

|   |              |             |             |
|---|--------------|-------------|-------------|
| H | -1.29683300  | 7.92352200  | 5.89770500  |
| C | 0.18156600   | 6.36650500  | 6.39381000  |
| H | 0.76550100   | 5.63352800  | 5.82469100  |
| H | 0.91751200   | 7.09277600  | 6.77587500  |
| C | -0.46901600  | 5.62327900  | 7.65684400  |
| H | -1.55584300  | 5.80998100  | 7.67906800  |
| H | -0.05968700  | 6.08723200  | 8.56885700  |
| C | -0.22269800  | 4.06747700  | 7.68804000  |
| H | -0.90821700  | 3.65760600  | 6.94711100  |
| H | 0.79423800   | 3.87761600  | 7.31230800  |
| C | -0.39277600  | 3.18401200  | 8.98805100  |
| H | -1.33193500  | 3.43461900  | 9.50832500  |
| H | 0.42899000   | 3.40183500  | 9.69175700  |
| C | -0.38200100  | 1.63732100  | 8.61995100  |
| H | 0.34188700   | 1.53847700  | 7.80315200  |
| H | -1.36034900  | 1.37443000  | 8.19622200  |
| C | 0.05965900   | 0.58508900  | 9.65087300  |
| C | -0.03627700  | -0.77703700 | 9.69690000  |
| H | 0.48873600   | -1.21746300 | 10.55448400 |
| H | 0.66521700   | 1.01064100  | 10.46091700 |
| H | -12.00625000 | -3.76213400 | -3.52465700 |
| H | -11.99600400 | -5.19237500 | -1.56866600 |
| H | -11.97213600 | -5.68280600 | 0.46761500  |
| H | -11.93148700 | -5.28579700 | 2.85839300  |
| H | -11.89104000 | -4.16207200 | 4.62595600  |
| H | -11.84404400 | -2.17618600 | 6.01387900  |
| H | -11.80835900 | -0.13500400 | 6.47425600  |
| H | -11.78254800 | 2.25451200  | 6.07308200  |
| H | -11.99919200 | -1.98052700 | -4.61976900 |
| H | -11.97515500 | 0.40804300  | -5.02357200 |
| H | -11.94381700 | 2.45034800  | -4.57262000 |
| H | -11.89969200 | 4.43700300  | -3.18579000 |
| H | -11.86014000 | 5.55451200  | -1.41407500 |
| H | -11.81923000 | 5.94677100  | 0.97718000  |
| H | -11.79242100 | 5.45915500  | 3.01481100  |
| H | -11.77821400 | 4.03358600  | 4.97414300  |

|   |              |             |             |
|---|--------------|-------------|-------------|
| C | -11.04861500 | -4.02336600 | -3.07697800 |
| C | -11.04282500 | -4.84053400 | -1.96042600 |
| C | -11.00879900 | -5.53990700 | 0.95480900  |
| C | -10.98564500 | -5.31322600 | 2.31952200  |
| C | -10.92726800 | -3.70805600 | 4.85119100  |
| C | -10.90049100 | -2.57391500 | 5.64343500  |
| C | -10.85038600 | 0.35259100  | 6.30035900  |
| C | -10.83557500 | 1.71702500  | 6.07122100  |
| C | -11.03877500 | -1.46816400 | -4.64841000 |
| C | -11.02500000 | -0.10385900 | -4.87913700 |
| C | -10.97990400 | 2.82414300  | -4.23071700 |
| C | -10.95470900 | 3.95894700  | -3.43933900 |
| C | -10.89790700 | 5.55842900  | -0.90424600 |
| C | -10.87463600 | 5.78213800  | 0.46104500  |
| C | -10.83685700 | 5.08331400  | 3.37732400  |
| C | -10.82870800 | 4.26891800  | 4.49591200  |
| C | -9.84976000  | -3.41700000 | -3.55915400 |
| C | -9.83766500  | -5.11105300 | -1.24502700 |
| C | -9.82117800  | -5.45066200 | 0.16809000  |
| C | -9.77312200  | -4.98063800 | 2.99517000  |
| C | -9.74503600  | -4.20218800 | 4.22226000  |
| C | -9.68943000  | -1.85161900 | 5.86412800  |
| C | -9.66506300  | -0.43316300 | 6.18046500  |
| C | -9.63460400  | 2.39563100  | 5.70486800  |
| C | -9.84513200  | -2.17788400 | -4.31929600 |
| C | -9.81659600  | 0.65124000  | -4.79796600 |
| C | -9.79471100  | 2.07073500  | -4.48524000 |
| C | -9.74236300  | 4.42283600  | -2.84603200 |
| C | -9.71483000  | 5.19898000  | -1.61745100 |
| C | -9.66630100  | 5.66216400  | 1.21129400  |
| C | -9.64809200  | 5.32185300  | 2.62428800  |
| C | -9.63139100  | 3.63298900  | 4.94238200  |
| C | -8.61352100  | -3.91813400 | -3.04568100 |
| C | -8.60739300  | -4.76867100 | -1.88646500 |
| C | -8.57520500  | -5.43078800 | 0.86798200  |
| C | -8.55108300  | -5.19458800 | 2.28553200  |

|   |             |             |             |
|---|-------------|-------------|-------------|
| C | -8.49610400 | -3.67805700 | 4.67790000  |
| C | -8.46854900 | -2.49924700 | 5.49993900  |
| C | -8.42140900 | 0.26826500  | 6.11458000  |
| C | -8.40583600 | 1.68574000  | 5.87565600  |
| C | -8.60437300 | -1.49947400 | -4.52765900 |
| C | -8.58988600 | -0.08180300 | -4.76812400 |
| C | -8.54721400 | 2.68766200  | -4.15916600 |
| C | -8.52075900 | 3.86811400  | -3.33902900 |
| C | -8.46707100 | 5.38148800  | -0.94499500 |
| C | -8.44302100 | 5.61290300  | 0.47360100  |
| C | -8.40777400 | 4.94839700  | 3.22836500  |
| C | -8.39926400 | 4.10047100  | 4.38917000  |
| C | -7.36726600 | -3.39729200 | -3.53736400 |
| C | -7.35557500 | -5.07719800 | -1.25030200 |
| C | -7.33897100 | -5.41108900 | 0.13469400  |
| C | -7.29114200 | -4.94405300 | 2.93099800  |
| C | -7.26400000 | -4.18146900 | 4.13424300  |
| C | -7.20949800 | -1.85547100 | 5.75679200  |
| C | -7.18572800 | -0.46414200 | 6.06310300  |
| C | -7.15507300 | 2.33445100  | 5.58945600  |
| C | -7.36309800 | -2.18101800 | -4.28050800 |
| C | -7.33450200 | 0.61897700  | -4.75526300 |
| C | -7.31277500 | 2.01137200  | -4.45096900 |
| C | -7.26089900 | 4.34184100  | -2.83403600 |
| C | -7.23400900 | 5.10326200  | -1.62978500 |
| C | -7.18624500 | 5.55928600  | 1.16909200  |
| C | -7.16873600 | 5.22432200  | 2.55408100  |
| C | -7.15196800 | 3.54875300  | 4.84389600  |
| C | -6.12935600 | -3.94954200 | -3.07733300 |
| C | -6.12321100 | -4.80217800 | -1.92311800 |
| C | -6.09042000 | -5.46627400 | 0.83269900  |
| C | -6.06612900 | -5.22769100 | 2.24718800  |
| C | -6.01195800 | -3.71203900 | 4.64327700  |
| C | -5.98493900 | -2.53577500 | 5.46395300  |
| C | -5.93736900 | 0.23542500  | 6.06960600  |
| C | -5.92111600 | 1.64965800  | 5.82854900  |

|   |             |             |             |
|---|-------------|-------------|-------------|
| C | -6.12050800 | -1.52764100 | -4.55851300 |
| C | -6.10567400 | -0.11283600 | -4.79853500 |
| C | -6.06292700 | 2.65999300  | -4.19402800 |
| C | -6.03624400 | 3.84042900  | -3.37886600 |
| C | -5.98287800 | 5.35409700  | -0.98264100 |
| C | -5.95903500 | 5.58345400  | 0.43314800  |
| C | -5.92401300 | 4.91860900  | 3.19034500  |
| C | -5.91498800 | 4.06926200  | 4.34629100  |
| C | -4.89472600 | -3.43414900 | -3.57374300 |
| C | -4.88349700 | -5.12427900 | -1.29289900 |
| C | -4.86577600 | -5.46127600 | 0.09870700  |
| C | -4.81731700 | -4.98696900 | 2.89706800  |
| C | -4.79051500 | -4.22406900 | 4.10876600  |
| C | -4.73727700 | -1.89860600 | 5.73645100  |
| C | -4.71366700 | -0.49874500 | 6.03621700  |
| C | -4.68117700 | 2.30219900  | 5.55238600  |
| C | -4.89119900 | -2.21431000 | -4.32490900 |
| C | -4.86133800 | 0.58809600  | -4.79515400 |
| C | -4.83937100 | 1.98872100  | -4.49570500 |
| C | -4.78739200 | 4.32219000  | -2.88118700 |
| C | -4.76053500 | 5.08589600  | -1.67071700 |
| C | -4.71343100 | 5.54108500  | 1.12958800  |
| C | -4.69607200 | 5.20800600  | 2.52200300  |
| C | -4.67792800 | 3.52636400  | 4.80902800  |
| C | -3.65574400 | -3.96047800 | -3.08632400 |
| C | -3.64914200 | -4.81959300 | -1.95272200 |
| C | -3.61372200 | -5.48257800 | 0.79714900  |
| C | -3.59013900 | -5.24097400 | 2.20156000  |
| C | -3.53720900 | -3.73589300 | 4.60337600  |
| C | -3.51093700 | -2.57148200 | 5.42421300  |
| C | -3.46412700 | 0.20101800  | 6.00790100  |
| C | -3.44718100 | 1.60296900  | 5.75689600  |
| C | -3.64663500 | -1.55086300 | -4.57448300 |
| C | -3.63111100 | -0.14519000 | -4.80286300 |
| C | -3.58736300 | 2.62508600  | -4.21198700 |
| C | -3.56028300 | 3.79665000  | -3.40100200 |

|   |             |             |             |
|---|-------------|-------------|-------------|
| C | -3.50882000 | 5.30699400  | -1.01174200 |
| C | -3.48539300 | 5.53402600  | 0.39298500  |
| C | -3.44957400 | 4.87768200  | 3.14587800  |
| C | -3.44024500 | 4.03239900  | 4.29242700  |
| C | -2.41809900 | -3.42816800 | -3.55859600 |
| C | -2.40520900 | -5.11846400 | -1.31908400 |
| C | -2.38666400 | -5.44203700 | 0.06597700  |
| C | -2.33935000 | -4.96209400 | 2.83430000  |
| C | -2.31150800 | -4.21208400 | 4.04246900  |
| C | -2.26064000 | -1.92435700 | 5.66498800  |
| C | -2.23875000 | -0.53083100 | 5.94728800  |
| C | -2.20556900 | 2.23120800  | 5.43170600  |
| C | -2.41345100 | -2.22515400 | -4.31361100 |
| C | -2.38365500 | 0.54869500  | -4.75529000 |
| C | -2.36169000 | 1.93986400  | -4.47592600 |
| C | -2.30971600 | 4.24372000  | -2.87338400 |
| C | -2.28242600 | 5.01660000  | -1.68403800 |
| C | -2.23716600 | 5.46792400  | 1.08189900  |
| C | -2.21927500 | 5.13291800  | 2.46290500  |
| C | -2.20004900 | 3.46129000  | 4.71600700  |
| C | -1.18275300 | -3.95098400 | -3.08990300 |
| C | -1.17581500 | -4.81072500 | -1.96782700 |
| C | -1.13794700 | -5.43602800 | 0.75114000  |
| C | -1.11338400 | -5.19439200 | 2.14388000  |
| C | -1.05932100 | -3.72540000 | 4.52225200  |
| C | -1.03247500 | -2.57576500 | 5.34760200  |
| C | -0.99061300 | 0.15156100  | 5.89390700  |
| C | -0.97656200 | 1.53282700  | 5.59990700  |
| C | -1.17169600 | -1.57245800 | -4.55190300 |
| C | -1.15685500 | -0.17427000 | -4.76282500 |
| C | -1.11219000 | 2.55555300  | -4.18102600 |
| C | -1.08390900 | 3.71482900  | -3.37225000 |
| C | -1.03244500 | 5.24706600  | -1.03875400 |
| C | -1.00877500 | 5.47669800  | 0.35787000  |
| C | -0.97229400 | 4.79992300  | 3.06713100  |
| C | -0.96457300 | 3.94450600  | 4.19562000  |



|   |            |             |             |
|---|------------|-------------|-------------|
| C | 0.05678600 | -3.45065800 | -3.59030100 |
| C | 0.07348900 | -5.12086300 | -1.35111700 |
| C | 0.09182300 | -5.42384900 | 0.02707600  |
| C | 0.13993400 | -4.95049600 | 2.78137900  |
| C | 0.16837000 | -4.21165800 | 3.98355200  |
| C | 0.22149200 | -1.95043500 | 5.62067700  |
| C | 0.24291400 | -0.56672400 | 5.90789900  |
| C | 0.27127200 | 2.16531400  | 5.32549500  |
| C | 0.06206100 | -2.25272900 | -4.33391700 |
| C | 0.09202800 | 0.50906500  | -4.76031900 |
| C | 0.11408600 | 1.88984300  | -4.47115100 |
| C | 0.17047600 | 4.18655600  | -2.87989400 |
| C | 0.19748300 | 4.97496400  | -1.71020500 |
| C | 0.24377100 | 5.44089400  | 1.04274000  |
| C | 0.26076600 | 5.08876800  | 2.40926400  |
| C | 0.27645000 | 3.38219100  | 4.61616400  |
| C | 1.29944400 | -4.01294400 | -3.16376300 |
| C | 1.30699100 | -4.85790700 | -2.02431700 |
| C | 1.34453400 | -5.47155400 | 0.71183400  |
| C | 1.37001700 | -5.23720800 | 2.11184400  |
| C | 1.42555000 | -3.76936600 | 4.50254300  |
| C | 1.45272800 | -2.61956000 | 5.33880100  |
| C | 1.49302000 | 0.12529700  | 5.92343900  |
| C | 1.50630100 | 1.51731500  | 5.62794300  |
| C | 1.30628000 | -1.61819200 | -4.62961500 |
| C | 1.32164400 | -0.21384800 | -4.82976000 |
| C | 1.36640500 | 2.53185700  | -4.23479100 |
| C | 1.39479200 | 3.69171400  | -3.41687700 |
| C | 1.45091000 | 5.24952100  | -1.08271400 |
| C | 1.47524700 | 5.49137000  | 0.31903100  |
| C | 1.51043100 | 4.79002600  | 3.03751100  |
| C | 1.51729800 | 3.92151600  | 4.16231000  |
| C | 2.53141500 | -3.53838500 | -3.70260800 |
| C | 2.54933700 | -5.19236300 | -1.41138800 |
| C | 2.56802600 | -5.50264100 | -0.01717700 |
| C | 2.61878300 | -5.04747700 | 2.77438600  |

|   |            |             |             |
|---|------------|-------------|-------------|
| C | 2.64722300 | -4.29743100 | 3.99076800  |
| C | 2.70151400 | -1.99623300 | 5.63742500  |
| C | 2.72224900 | -0.59791000 | 5.93853300  |
| C | 2.74523200 | 2.18734600  | 5.40541800  |
| C | 2.53569300 | -2.31624700 | -4.44605000 |
| C | 2.56416500 | 0.48154800  | -4.88096600 |
| C | 2.58766300 | 1.87828500  | -4.57524000 |
| C | 2.64413100 | 4.20104000  | -2.95881200 |
| C | 2.67278900 | 4.99591800  | -1.77251000 |
| C | 2.72254700 | 5.47730300  | 1.01212200  |
| C | 2.74023900 | 5.12065400  | 2.39755300  |
| C | 2.75068400 | 3.40513700  | 4.65547100  |
| C | 3.77087100 | -4.09223000 | -3.25016600 |
| C | 3.77928000 | -4.92767600 | -2.09175800 |
| C | 3.81582900 | -5.56267800 | 0.67899600  |
| C | 3.84217400 | -5.33177900 | 2.08855900  |
| C | 3.90039900 | -3.83288600 | 4.50417200  |
| C | 3.92776300 | -2.66895900 | 5.33183300  |
| C | 3.96753900 | 0.10901900  | 5.93325800  |
| C | 3.97922100 | 1.51420900  | 5.67289400  |
| C | 3.77697900 | -1.66253800 | -4.72746000 |
| C | 3.79119100 | -0.25050800 | -4.94875700 |
| C | 3.83773400 | 2.52750700  | -4.32683000 |
| C | 3.86544700 | 3.70151500  | -3.51158100 |
| C | 3.92646300 | 5.25362900  | -1.13075700 |
| C | 3.95158300 | 5.49502800  | 0.27723000  |
| C | 3.98275000 | 4.79774700  | 3.03248600  |
| C | 3.98808800 | 3.93761400  | 4.17366800  |
| C | 5.00945900 | -3.57925600 | -3.75943700 |
| C | 5.02599200 | -5.24271400 | -1.45717800 |
| C | 5.04443000 | -5.56471900 | -0.06059400 |
| C | 5.09620900 | -5.09964700 | 2.74308200  |
| C | 5.12548100 | -4.34169000 | 3.95934300  |
| C | 5.17998700 | -2.02270300 | 5.59796200  |
| C | 5.20013100 | -0.62245000 | 5.90258500  |
| C | 5.22259800 | 2.17619900  | 5.40384700  |

|   |            |             |             |
|---|------------|-------------|-------------|
| C | 5.01284500 | -2.35375400 | -4.50328800 |
| C | 5.03995700 | 0.45411300  | -4.95534400 |
| C | 5.06322300 | 1.85293500  | -4.64060700 |
| C | 5.12085500 | 4.19140100  | -3.02375900 |
| C | 5.15128500 | 4.97082300  | -1.82078700 |
| C | 5.20212500 | 5.44155000  | 0.97775100  |
| C | 5.21807200 | 5.09274900  | 2.36806200  |
| C | 5.22697700 | 3.39530100  | 4.64924200  |
| C | 6.24636600 | -4.11425000 | -3.28756600 |
| C | 6.25458700 | -4.95563100 | -2.12555500 |
| C | 6.29079200 | -5.59899600 | 0.63552700  |
| C | 6.31697300 | -5.36278800 | 2.05044900  |
| C | 6.37547400 | -3.85917500 | 4.45298300  |
| C | 6.40284700 | -2.68708200 | 5.27908300  |
| C | 6.44277000 | 0.08100500  | 5.88780700  |
| C | 6.45439800 | 1.49378800  | 5.64021600  |
| C | 6.25182300 | -1.69350100 | -4.76450600 |
| C | 6.26569800 | -0.27711600 | -4.99420400 |
| C | 6.31178400 | 2.49092800  | -4.37090400 |
| C | 6.34062300 | 3.67085100  | -3.55500300 |
| C | 6.40161600 | 5.20179000  | -1.17054300 |
| C | 6.42701800 | 5.43817900  | 0.24386300  |
| C | 6.45728800 | 4.76027500  | 2.99516100  |
| C | 6.46219400 | 3.90693500  | 4.14817500  |
| C | 7.48337900 | -3.59201500 | -3.78265900 |
| C | 7.49981400 | -5.25582000 | -1.48730100 |
| C | 7.51809000 | -5.58051800 | -0.10042000 |
| C | 7.56976300 | -5.11293000 | 2.69567700  |
| C | 7.59914700 | -4.35618200 | 3.90200500  |
| C | 7.65301800 | -2.03879300 | 5.53350900  |
| C | 7.67310200 | -0.64832900 | 5.84108500  |
| C | 7.69669900 | 2.14696000  | 5.35982200  |
| C | 7.48631400 | -2.37634600 | -4.52538800 |
| C | 7.51334800 | 0.42369000  | -4.98341900 |
| C | 7.53640600 | 1.81360800  | -4.67075600 |
| C | 7.59471500 | 4.14245700  | -3.05269400 |

|   |             |             |             |
|---|-------------|-------------|-------------|
| C | 7.62518000  | 4.90997300  | -1.85301900 |
| C | 7.67533500  | 5.37484100  | 0.94121500  |
| C | 7.69073400  | 5.03685800  | 2.32462300  |
| C | 7.70063300  | 3.35882200  | 4.61112300  |
| C | 8.73101600  | -4.14108600 | -3.32651300 |
| C | 8.73931300  | -4.98508200 | -2.16329600 |
| C | 8.77562300  | -5.63288800 | 0.59412100  |
| C | 8.80187600  | -5.39543600 | 2.01128700  |
| C | 8.85996000  | -3.88728900 | 4.40862700  |
| C | 8.88727000  | -2.71222900 | 5.23544800  |
| C | 8.92756500  | 0.05310800  | 5.85306400  |
| C | 8.93950700  | 1.46980500  | 5.61174600  |
| C | 8.73630000  | -1.72519200 | -4.80821700 |
| C | 8.74998400  | -0.30694300 | -5.04155000 |
| C | 8.79602000  | 2.45862400  | -4.41913400 |
| C | 8.82550500  | 3.63776000  | -3.59785000 |
| C | 8.88608800  | 5.15783800  | -1.20898600 |
| C | 8.91152600  | 5.39346300  | 0.20832400  |
| C | 8.94199600  | 4.72948000  | 2.96148800  |
| C | 8.94716100  | 3.88152200  | 4.12181400  |
| C | 9.96299200  | -3.67295300 | -3.87934500 |
| C | 9.97973300  | -5.35635400 | -1.55827700 |
| C | 9.99825900  | -5.68938800 | -0.14376400 |
| C | 10.05046000 | -5.21570500 | 2.68320400  |
| C | 10.08044500 | -4.44066500 | 3.91220800  |
| C | 10.13465100 | -2.09628900 | 5.56260500  |
| C | 10.15507200 | -0.67851300 | 5.88149900  |
| C | 10.17943800 | 2.14955300  | 5.40384100  |
| C | 9.96566600  | -2.43455300 | -4.64022500 |
| C | 9.99301400  | 0.39545200  | -5.10791000 |
| C | 10.01654800 | 1.81328800  | -4.78907900 |
| C | 10.07580200 | 4.16293800  | -3.14635600 |
| C | 10.10710300 | 4.94075000  | -1.91909300 |
| C | 10.15751700 | 5.41091700  | 0.90811800  |
| C | 10.17284200 | 5.07304500  | 2.32144200  |
| C | 10.18340000 | 3.38601900  | 4.64027100  |

|   |             |             |             |
|---|-------------|-------------|-------------|
| C | 11.16043300 | -4.30806900 | -3.43214500 |
| C | 11.16858400 | -5.12060100 | -2.31217400 |
| C | 11.20683800 | -5.80911200 | 0.60618600  |
| C | 11.23211500 | -5.58058000 | 1.97056100  |
| C | 11.29380900 | -3.97860100 | 4.50521500  |
| C | 11.32000900 | -2.84740700 | 5.30163900  |
| C | 11.36236500 | 0.07796900  | 5.96552100  |
| C | 11.37394000 | 1.44233400  | 5.73579500  |
| C | 11.16579100 | -1.75407500 | -5.00548900 |
| C | 11.17890600 | -0.38897800 | -5.23138400 |
| C | 11.22751600 | 2.53698100  | -4.57274900 |
| C | 11.25623900 | 3.67047600  | -3.77964800 |
| C | 11.32085000 | 5.26955400  | -1.24359100 |
| C | 11.34528800 | 5.49648500  | 0.12113500  |
| C | 11.37705500 | 4.80707600  | 3.03996200  |
| C | 11.38204700 | 3.99376100  | 4.15927900  |
| H | 12.10997800 | -4.07261900 | -3.91036500 |
| H | 12.12416600 | -5.49527700 | -1.94848900 |
| H | 12.15040800 | -5.97903400 | 0.08988000  |
| H | 12.19450600 | -5.57878200 | 2.48003400  |
| H | 12.23845600 | -4.45526600 | 4.24798600  |
| H | 12.28427300 | -2.47424700 | 5.64321200  |
| H | 12.31290100 | -0.43283900 | 6.11134800  |
| H | 12.33326400 | 1.95677800  | 5.70920700  |
| H | 12.11335800 | -2.29061700 | -5.00872700 |
| H | 12.13634400 | 0.09994600  | -5.40458400 |
| H | 12.17001900 | 2.14080900  | -4.94755800 |
| H | 12.22028900 | 4.12564900  | -3.55780000 |
| H | 12.26656700 | 5.23818800  | -1.78250600 |
| H | 12.30923600 | 5.63582800  | 0.60813700  |
| H | 12.33012000 | 5.16076600  | 2.64959100  |
| H | 12.33899900 | 3.73689800  | 4.61086400  |

**(9,9)@Cycle-8**

|   |             |             |             |
|---|-------------|-------------|-------------|
| C | -0.72259600 | -0.75075800 | -8.26007400 |
| C | 1.63190100  | -0.98473600 | -8.19755900 |

|   |             |             |             |
|---|-------------|-------------|-------------|
| C | -0.60517000 | 0.66957300  | -8.28794600 |
| H | -1.73625400 | -1.15509100 | -8.24816900 |
| C | 1.74697600  | 0.43426000  | -8.22445300 |
| H | 2.55519400  | -1.56139100 | -8.14152300 |
| H | -1.53030400 | 1.24664300  | -8.29965800 |
| H | 2.75962700  | 0.83950300  | -8.17796700 |
| C | 0.74654000  | 8.32314300  | -2.54083500 |
| C | 2.85600500  | 8.91423000  | -3.77512000 |
| C | 1.72186200  | 8.12500700  | -3.67790700 |
| C | 1.33314400  | 7.15354200  | -4.77218200 |
| C | 2.25426500  | 6.43058200  | -5.57178600 |
| C | -0.39492700 | 5.84345300  | -5.96272400 |
| C | 1.90263000  | 5.42876200  | -6.50706500 |
| H | 3.31990000  | 6.54904600  | -5.39486200 |
| H | -1.43617700 | 5.54591600  | -6.05328100 |
| H | 2.70982700  | 4.89487900  | -7.00631900 |
| C | 0.64236700  | 1.33140300  | -8.17031800 |
| C | 0.56186600  | 5.03363700  | -6.66139700 |
| C | 0.98224100  | 2.90809700  | -8.06250600 |
| H | 1.05147400  | 3.30269900  | -9.08834500 |
| H | 1.97757500  | 2.95071500  | -7.60261400 |
| O | 0.08649000  | 3.87127400  | -7.33088300 |
| C | -0.05224000 | 6.88688500  | -5.03555700 |
| C | -1.03574400 | 7.74605500  | -4.27946300 |
| C | -2.19013600 | 8.20022700  | -4.89694900 |
| S | -2.68125700 | 7.75721300  | -6.57135200 |
| S | -3.31698200 | 9.41509500  | -4.19441100 |
| C | -3.96059800 | 8.95014400  | -6.73363800 |
| H | -4.47009500 | 9.00566500  | -7.69354100 |
| C | -4.24957200 | 9.70276100  | -5.65541300 |
| H | -5.02926500 | 10.46023300 | -5.60696200 |
| S | 3.96417000  | 8.94778000  | -5.19338300 |
| C | 4.58810900  | 10.91356900 | -3.51323900 |
| H | 5.08503800  | 11.77991300 | -3.08120700 |
| S | 3.33398800  | 10.14552400 | -2.55218700 |
| C | 4.87546200  | 10.37061300 | -4.71120400 |

|   |             |             |             |
|---|-------------|-------------|-------------|
| H | 5.64042600  | 10.72788100 | -5.39764600 |
| C | 0.13713100  | 8.78445800  | -0.11497600 |
| C | -0.64069300 | 8.20485900  | -2.89283600 |
| C | -1.56141900 | 8.50353200  | -1.85768800 |
| H | -2.62572300 | 8.38545500  | -2.04275400 |
| C | -1.20725600 | 8.81480000  | -0.52504600 |
| H | -2.00650300 | 8.94887300  | 0.20312300  |
| C | 1.09414400  | 8.60378800  | -1.17505800 |
| H | 2.13881600  | 8.55476300  | -0.87859700 |
| O | 0.60511300  | 8.81510000  | 1.21593300  |
| C | 0.66921200  | -8.77827200 | 0.20329300  |
| C | 1.53884500  | -8.33698700 | -2.57752000 |
| C | -0.24901000 | -8.63189700 | -0.89379200 |
| H | -1.30056100 | -8.54753500 | -0.63100600 |
| C | 2.02634200  | -8.84124500 | -0.16379600 |
| H | 2.80155400  | -8.95653000 | 0.59297800  |
| C | 2.42394600  | -8.60367100 | -1.50117000 |
| H | 3.49513300  | -8.50863800 | -1.65859100 |
| C | 0.14184300  | -8.42313000 | -2.26081900 |
| C | -0.80196800 | -8.26357500 | -3.42745000 |
| C | 1.97531700  | -7.94087900 | -3.97310300 |
| C | 1.02086400  | -7.10238200 | -4.79118300 |
| C | -0.37254400 | -7.35041800 | -4.55376800 |
| C | 1.39416000  | -6.09107200 | -5.74348900 |
| H | 2.43983700  | -5.80660600 | -5.82297900 |
| C | -1.26981500 | -6.64938200 | -5.39691200 |
| H | -2.33995000 | -6.75541600 | -5.24156300 |
| C | -0.88960700 | -5.68686400 | -6.35805000 |
| H | -1.68166800 | -5.16392600 | -6.89158400 |
| C | 0.45569800  | -5.30097400 | -6.49072000 |
| O | 0.93617600  | -4.14609300 | -7.17234200 |
| C | 0.37992000  | -1.64160900 | -8.11253900 |
| C | 0.05085200  | -3.21747300 | -7.96235100 |
| C | 3.13776500  | -8.43454400 | -4.54107400 |
| C | -1.95043800 | -9.03497700 | -3.51183900 |
| S | 3.68021100  | -8.06010700 | -6.21616400 |

|   |             |              |             |
|---|-------------|--------------|-------------|
| S | 4.22978600  | -9.63355700  | -3.76057600 |
| S | -2.48037500 | -10.19559300 | -2.24224600 |
| S | -3.02436400 | -9.12148800  | -4.95405400 |
| C | 5.20396100  | -9.98163400  | -5.18092400 |
| H | 5.97466100  | -10.74328900 | -5.08129600 |
| C | 4.95378700  | -9.26777600  | -6.29464700 |
| H | 5.49074200  | -9.36405100  | -7.23618900 |
| C | -3.97214900 | -10.50308800 | -4.42550000 |
| H | -4.72699700 | -10.88078000 | -5.11220600 |
| C | -3.72414500 | -10.98997000 | -3.19507700 |
| H | -4.24748700 | -11.82452000 | -2.73273100 |
| H | 0.01671000  | -3.64367500  | -8.97719100 |
| H | -0.95763700 | -3.25517800  | -7.53236600 |
| O | 0.14473000  | -8.76291700  | 1.51315600  |
| C | 0.96641000  | -8.69337500  | 2.79325700  |
| H | 1.81817900  | -8.02647000  | 2.62327000  |
| H | 1.34778300  | -9.71044800  | 2.96722600  |
| C | 0.09211600  | -8.20874300  | 4.07778200  |
| H | -0.48333600 | -9.08421800  | 4.41428900  |
| H | -0.64404700 | -7.49736700  | 3.70401600  |
| C | 0.83170500  | -7.56853700  | 5.40142600  |
| H | 1.29197900  | -8.40645900  | 5.94876500  |
| H | 1.66279700  | -6.93998200  | 5.07059200  |
| C | -0.05570100 | -6.71493800  | 6.49567600  |
| H | -0.60044100 | -7.45183200  | 7.10714700  |
| H | -0.82894200 | -6.15656300  | 5.95910300  |
| C | 0.70773200  | -5.69790900  | 7.54870700  |
| H | 1.12520400  | -6.32987400  | 8.34903100  |
| H | 1.57279300  | -5.25620900  | 7.04396000  |
| C | -0.14368200 | -4.49243600  | 8.27535400  |
| H | -0.76117900 | -4.96454700  | 9.05633700  |
| H | -0.85259800 | -4.09909500  | 7.54759900  |
| C | 0.62973200  | -3.22692100  | 8.97839200  |
| H | 1.02830600  | -3.58693700  | 9.94034600  |
| H | 1.50730400  | -2.97486000  | 8.37645900  |
| C | -0.17374100 | -1.81273900  | 9.33449200  |



|   |              |             |             |
|---|--------------|-------------|-------------|
| H | -0.66003500  | -1.99139300 | 10.30987700 |
| H | -0.99915600  | -1.64572500 | 8.63378800  |
| C | -0.28663500  | 8.81938400  | 2.44918000  |
| H | -0.63741500  | 9.85508700  | 2.56980900  |
| H | -1.15237600  | 8.17955400  | 2.25119900  |
| C | 0.48289800   | 8.34343100  | 3.79880900  |
| H | 1.18846100   | 7.56654600  | 3.50765700  |
| H | 1.09824200   | 9.19339800  | 4.13041300  |
| C | -0.37759800  | 7.82151800  | 5.09874300  |
| H | -1.24264200  | 7.25248100  | 4.74330100  |
| H | -0.78899100  | 8.71543600  | 5.59472000  |
| C | 0.39565000   | 6.94706700  | 6.25698600  |
| H | 1.05219000   | 6.22855500  | 5.77550400  |
| H | 1.07193100   | 7.65421200  | 6.76138100  |
| C | -0.47556000  | 6.23955600  | 7.48050500  |
| H | -1.53587500  | 6.39504400  | 7.22453000  |
| H | -0.28434600  | 6.89055300  | 8.34551600  |
| C | -0.64680000  | 4.68843000  | 8.20240500  |
| H | -1.26577900  | 5.00653000  | 9.05760300  |
| H | -1.33634900  | 4.14390900  | 7.55858300  |
| C | 0.38961100   | 3.60141300  | 8.81378200  |
| H | 0.85693300   | 4.03757500  | 9.71114500  |
| H | 1.20665100   | 3.41872700  | 8.11418000  |
| C | -0.26552600  | 2.14520400  | 9.29426300  |
| H | -1.11892900  | 1.89665000  | 8.65770300  |
| H | -0.70006600  | 2.34789000  | 10.28950600 |
| C | 0.69258700   | 0.88858300  | 9.50167600  |
| C | 0.71959600   | -0.50399300 | 9.52487600  |
| H | 1.72683300   | -0.83876500 | 9.80465900  |
| H | 1.68456400   | 1.27345400  | 9.77177300  |
| C | -11.16734900 | -6.17829600 | -1.19946700 |
| C | -9.98272000  | -6.22694200 | -0.40689100 |
| C | -8.73752300  | -6.02639800 | -1.07961700 |
| C | -8.71803200  | -5.52723800 | -2.42738800 |
| C | -9.94373800  | -5.22994900 | -3.09999200 |
| C | -11.14854700 | -5.69806600 | -2.49724100 |

|   |              |             |             |
|---|--------------|-------------|-------------|
| C | -7.50226000  | -6.13348700 | -0.35223700 |
| C | -6.25323600  | -6.01257100 | -1.03948600 |
| C | -6.23415500  | -5.51155000 | -2.38395800 |
| C | -7.46372900  | -5.14465900 | -3.01628500 |
| C | -5.02866200  | -6.14190400 | -0.31646900 |
| C | -3.77788800  | -5.99517300 | -1.00115800 |
| C | -3.75960400  | -5.49241500 | -2.33571300 |
| C | -4.99070900  | -5.14415500 | -2.98149900 |
| C | -2.55128100  | -6.07877100 | -0.27261700 |
| C | -1.30805400  | -5.86472200 | -0.93175200 |
| C | -1.28899900  | -5.39290100 | -2.25780000 |
| C | -2.51636000  | -5.08684900 | -2.90901300 |
| C | -5.05225600  | -6.14692300 | 1.11607200  |
| C | -3.82429000  | -6.00967800 | 1.84287700  |
| C | -2.57485500  | -6.09192200 | 1.15258700  |
| C | -6.29948800  | -6.02414800 | 1.80065000  |
| C | -6.32395800  | -5.54039500 | 3.15121400  |
| C | -5.10044000  | -5.18422100 | 3.79523500  |
| C | -3.84929800  | -5.52457600 | 3.18458500  |
| C | -7.52560200  | -6.13967900 | 1.07272600  |
| C | -8.78357100  | -6.04071200 | 1.76120600  |
| C | -8.80799900  | -5.55919400 | 3.11536000  |
| C | -7.57375000  | -5.18487900 | 3.75007600  |
| C | -10.00626900 | -6.23462800 | 1.04664800  |
| C | -11.21582600 | -6.19596300 | 1.80114400  |
| C | -11.23932100 | -5.73381900 | 3.10536700  |
| C | -10.05497300 | -5.27451100 | 3.75365100  |
| C | -7.59656600  | -4.28249000 | 4.85292600  |
| C | -8.85341200  | -3.76059800 | 5.31541800  |
| C | -10.07811600 | -4.35504500 | 4.87938800  |
| C | -6.36926100  | -3.73898100 | 5.34854500  |
| C | -5.12323400  | -4.27408100 | 4.90152400  |
| C | -3.89478100  | -3.71205000 | 5.38034800  |
| C | -2.64670000  | -4.21711900 | 4.89956800  |
| C | -2.62426700  | -5.12812100 | 3.80575100  |
| C | -1.37714200  | -5.40374700 | 3.17730600  |

|   |             |             |             |
|---|-------------|-------------|-------------|
| C | -1.35268800 | -5.89548400 | 1.85338900  |
| C | -1.42270700 | -3.62313100 | 5.31604400  |
| C | -0.16684500 | -4.10763300 | 4.84938100  |
| C | -0.14486400 | -5.00082000 | 3.77340700  |
| C | 1.11088900  | -5.34404300 | 3.20018000  |
| C | 1.13354000  | -5.81347300 | 1.87950200  |
| C | -0.09804100 | -5.94404500 | 1.17931000  |
| C | -0.07298700 | -5.92541400 | -0.21890500 |
| C | -0.03832000 | -5.00070400 | -2.82243300 |
| C | 1.20030300  | -5.34084800 | -2.20732500 |
| C | 1.18139300  | -5.78659000 | -0.87883200 |
| C | 2.41010600  | -5.92867600 | -0.18391600 |
| C | 2.38681500  | -5.96099800 | 1.22421200  |
| C | 3.65938500  | -5.86959500 | -0.86843300 |
| C | 3.67874700  | -5.41178100 | -2.20858500 |
| C | 2.44715400  | -5.02775000 | -2.81475100 |
| C | 2.45987000  | -4.10014600 | -3.87899100 |
| C | 1.22347400  | -3.53023000 | -4.28624900 |
| C | -0.02565700 | -4.06845400 | -3.86468200 |
| C | -1.26344200 | -3.56458200 | -4.35930500 |
| C | -2.50320900 | -4.15173200 | -3.98012500 |
| C | 4.92754600  | -5.08292200 | -2.82628500 |
| C | 4.94006900  | -4.15891500 | -3.91672000 |
| C | 3.70305900  | -3.59107400 | -4.36178200 |
| C | 3.70811900  | -2.34723200 | -5.04566000 |
| C | 2.46896400  | -1.66514900 | -5.23133400 |
| C | 1.22942500  | -2.31378200 | -4.98178700 |
| C | -0.01378400 | -1.66176800 | -5.21389000 |
| C | -1.25698200 | -2.34482100 | -5.06547100 |
| C | -0.01960700 | -0.27658200 | -5.40196400 |
| C | 1.21949000  | 0.41911400  | -5.37803500 |
| C | 2.46457700  | -0.26703800 | -5.41421600 |
| C | 3.69710800  | 0.44809800  | -5.46831700 |
| C | 4.94181600  | -0.25825100 | -5.50144500 |
| C | 4.94754100  | -1.67226300 | -5.28688300 |
| C | 6.18411800  | -2.34251300 | -5.04177800 |

|   |             |             |             |
|---|-------------|-------------|-------------|
| C | 6.17993400  | -3.59910700 | -4.35032900 |
| C | 3.68471800  | 1.84614500  | -5.21855500 |
| C | 2.43705000  | 2.48273500  | -4.94131100 |
| C | 1.20586400  | 1.80389800  | -5.15543100 |
| C | -0.04609700 | 2.44206000  | -4.93642300 |
| C | -1.27973000 | 1.80098000  | -5.25126900 |
| C | -1.26664100 | 0.41135300  | -5.47464600 |
| C | -2.49629500 | -0.29814600 | -5.59056300 |
| C | -2.49177800 | -1.70568400 | -5.37855300 |
| C | -0.06551400 | 3.63069500  | -4.20021400 |
| C | 1.16605700  | 4.16668800  | -3.72890100 |
| C | 2.41651300  | 3.68168400  | -4.19635600 |
| C | 3.64273300  | 4.26974400  | -3.76653300 |
| C | 4.89345100  | 3.76366500  | -4.24429500 |
| C | 4.91558200  | 2.53503300  | -4.97650500 |
| C | 6.15904200  | 1.87475500  | -5.21210300 |
| C | 6.17248000  | 0.46575300  | -5.48130400 |
| C | 3.61814600  | 5.18521200  | -2.68246500 |
| C | 2.36739500  | 5.48266800  | -2.06478300 |
| C | 1.14161700  | 5.08066000  | -2.66565900 |
| C | -0.11657500 | 5.39207600  | -2.07640100 |
| C | -1.34699700 | 5.07098100  | -2.72184600 |
| C | -1.32298000 | 4.17358000  | -3.80381300 |
| C | -2.54446300 | 3.69125100  | -4.35250200 |
| C | -2.52362700 | 2.47533800  | -5.09224600 |
| C | -0.13957200 | 5.81285900  | -0.74392200 |
| C | 1.09334900  | 5.96013100  | -0.04643900 |
| C | 2.34383500  | 5.92939500  | -0.72407000 |
| C | 3.56848100  | 6.12273000  | -0.01710900 |
| C | 4.82025900  | 6.05140300  | -0.70911600 |
| C | 4.84530000  | 5.57663700  | -2.05777300 |
| C | 6.09285800  | 5.23682500  | -2.66321300 |
| C | 6.11733200  | 4.32301300  | -3.76854500 |
| C | 3.54887100  | 6.10764300  | 1.40460600  |
| C | 2.30412700  | 5.90778900  | 2.06981800  |
| C | 1.07421900  | 5.96667600  | 1.35630900  |

|   |             |             |             |
|---|-------------|-------------|-------------|
| C | -0.17800100 | 5.80882900  | 2.01563700  |
| C | -1.41452300 | 5.95512100  | 1.32112500  |
| C | -1.39360500 | 5.94108300  | -0.08478600 |
| C | -2.61945100 | 5.88062000  | -0.80441000 |
| C | -2.59575200 | 5.44166700  | -2.15263900 |
| C | -0.19423100 | 5.32654900  | 3.32810800  |
| C | 1.04458100  | 4.98571300  | 3.94070600  |
| C | 2.28844300  | 5.40467300  | 3.39385800  |
| C | 3.51728400  | 5.11461100  | 4.06027400  |
| C | 4.76225400  | 5.51070900  | 3.47345600  |
| C | 4.77802900  | 6.01197900  | 2.13328300  |
| C | 6.02278000  | 6.15915600  | 1.44977400  |
| C | 6.04390000  | 6.18027100  | 0.01542500  |
| C | 3.50682900  | 4.20210700  | 5.15078000  |
| C | 2.26655200  | 3.61543000  | 5.54880000  |
| C | 1.03346100  | 4.09144700  | 5.02572500  |
| C | -0.21598600 | 3.55497000  | 5.44257400  |
| C | -1.45735400 | 4.12023200  | 5.02290600  |
| C | -1.44646600 | 5.01860600  | 3.93872500  |
| C | -2.67772100 | 5.42646600  | 3.34819400  |
| C | -2.66101500 | 5.90382700  | 2.00884800  |
| C | 4.74325500  | 3.67621800  | 5.64708700  |
| C | 5.98140400  | 4.23374400  | 5.20480800  |
| C | 5.99103900  | 5.16220400  | 4.11146500  |
| C | -2.70084300 | 3.61117500  | 5.49850600  |
| C | -0.22110800 | 2.33425700  | 6.12579500  |
| C | 1.02459100  | 1.69428700  | 6.38992800  |
| C | 2.26395200  | 2.37997500  | 6.24185800  |
| C | 3.50072400  | 1.74060000  | 6.55335800  |
| C | 4.74002700  | 2.43144200  | 6.35271500  |
| C | 3.50412000  | 0.33562500  | 6.77289100  |
| C | 2.27155900  | -0.37697600 | 6.68166200  |
| C | 1.02925200  | 0.31225200  | 6.61550800  |
| C | -0.21306500 | -0.38266100 | 6.57020500  |
| C | -1.46156200 | 0.30037200  | 6.62540600  |
| C | -1.46702600 | 1.69157100  | 6.38139200  |

|   |             |             |            |
|---|-------------|-------------|------------|
| C | -2.70466500 | 2.37072400  | 6.19691700 |
| C | 2.28222400  | -1.76094900 | 6.39763200 |
| C | 1.04929900  | -2.39201300 | 6.06360300 |
| C | -0.20228800 | -1.75179500 | 6.28442800 |
| C | -1.44045700 | -2.41785700 | 6.04964300 |
| C | -2.68406700 | -1.80451600 | 6.36670500 |
| C | -2.69558600 | -0.41075300 | 6.65640800 |
| C | -3.93931700 | 0.29516200  | 6.68274600 |
| C | -3.94359800 | 1.70235600  | 6.45213400 |
| C | -5.18408300 | 2.37703400  | 6.20592700 |
| C | 5.97587700  | 1.76325200  | 6.60658500 |
| C | 5.97982700  | 0.34716300  | 6.83510700 |
| C | 4.74772000  | -0.37433500 | 6.80442600 |
| C | 4.75864300  | -1.77747600 | 6.52783000 |
| C | 3.52577700  | -2.43921000 | 6.22146700 |
| C | 3.54329900  | -3.65441300 | 5.48466200 |
| C | 2.31695800  | -4.14819200 | 4.94707200 |
| C | 1.06657000  | -3.58906300 | 5.33489900 |
| C | -3.91359600 | -2.49276900 | 6.11957200 |
| C | -5.16174400 | -1.83688700 | 6.37385100 |
| C | -5.17457800 | -0.43214900 | 6.65475400 |
| C | -6.41470500 | 0.27531600  | 6.64132200 |
| C | -6.41949900 | 1.69179800  | 6.41614300 |
| C | 7.21369200  | 2.44199900  | 6.37290100 |
| C | 8.45986100  | 1.77745000  | 6.64027300 |
| C | 8.46384700  | 0.35879400  | 6.87273000 |
| C | 7.22152100  | -0.36352300 | 6.83095600 |
| C | 7.23233000  | -1.76317400 | 6.56073900 |
| C | 6.00123900  | -2.44139400 | 6.29390200 |
| C | 6.01877800  | -3.67107600 | 5.55604800 |
| C | 4.79322300  | -4.21268300 | 5.06295500 |
| C | 2.33937400  | -5.04004800 | 3.85226400 |
| C | 3.58894700  | -5.44154300 | 3.29338700 |
| C | 4.81627900  | -5.11621100 | 3.95542400 |
| C | 8.48525000  | -2.43215400 | 6.33808400 |
| C | 8.50262900  | -3.66642100 | 5.60097600 |

|   |             |             |             |
|---|-------------|-------------|-------------|
| C | 7.26663700  | -4.20352300 | 5.10087100  |
| C | 7.28892200  | -5.10515800 | 3.99677800  |
| C | 6.06298100  | -5.46800000 | 3.35535900  |
| C | 6.08703200  | -5.94356600 | 2.00238700  |
| C | 4.86436300  | -6.05619200 | 1.27522000  |
| C | 3.61273800  | -5.90786700 | 1.95334600  |
| C | -6.38844000 | -2.51064800 | 6.08931800  |
| C | 7.21663100  | 3.68253800  | 5.67099300  |
| C | -5.18046500 | 3.62433800  | 5.50185900  |
| C | -3.93603900 | 4.17929000  | 5.05616600  |
| C | -3.92446300 | 5.09844300  | 3.96664800  |
| C | 8.46521000  | 4.25184700  | 5.24297900  |
| C | 8.47460500  | 5.18594200  | 4.15008500  |
| C | 7.23525900  | 5.52699900  | 3.50657900  |
| C | 7.25100700  | 6.02800700  | 2.17194500  |
| C | -6.41201400 | 4.16483500  | 5.02128800  |
| C | -6.40041200 | 5.09073700  | 3.92577300  |
| C | -5.15696900 | 5.46106500  | 3.32996600  |
| C | -5.13872500 | 5.94709800  | 1.98290700  |
| C | -3.88842800 | 6.05913600  | 1.29353500  |
| C | -3.86563400 | 6.05178900  | -0.13165000 |
| C | 8.50636400  | 6.18688000  | 1.48982900  |
| C | 8.52782900  | 6.20484900  | 0.05226500  |
| C | 7.29365200  | 6.06493200  | -0.67157200 |
| C | 7.31834700  | 5.59157800  | -2.01608800 |
| C | -6.36284900 | 6.06110600  | 1.25585600  |
| C | -6.33980400 | 6.06740300  | -0.17879000 |
| C | -5.09264500 | 5.95303700  | -0.86447700 |
| C | -5.06886400 | 5.48805000  | -2.21867100 |
| C | -3.81838600 | 5.13518200  | -2.82134600 |
| C | -3.79310000 | 4.24785600  | -3.93644900 |
| C | 8.57663900  | 5.26087600  | -2.62777500 |
| C | 8.60115600  | 4.34521600  | -3.73634800 |
| C | 7.36657100  | 3.78100700  | -4.20907800 |
| C | 7.38765400  | 2.55212700  | -4.93204600 |
| C | -6.29206900 | 5.13505000  | -2.86406600 |

|   |             |             |             |
|---|-------------|-------------|-------------|
| C | -6.26805400 | 4.23546700  | -3.98162700 |
| C | -5.02164400 | 3.70809200  | -4.43859700 |
| C | -5.00108600 | 2.47869100  | -5.17355400 |
| C | -3.75151200 | 1.81169100  | -5.39786900 |
| C | -3.73710000 | 0.40789300  | -5.65548400 |
| C | 8.64222500  | 1.89535500  | -5.17935000 |
| C | 8.65620200  | 0.48263200  | -5.44863700 |
| C | 7.41520500  | -0.24313800 | -5.46574600 |
| C | 7.42085000  | -1.65174500 | -5.24424000 |
| C | -6.22790100 | 1.79878200  | -5.44114000 |
| C | -6.21383100 | 0.38903500  | -5.70928900 |
| C | -4.97300100 | -0.31844800 | -5.70090700 |
| C | -4.96888300 | -1.73202100 | -5.46798600 |
| C | -3.72938600 | -2.39906700 | -5.19851000 |
| C | -3.73355000 | -3.63891900 | -4.49217700 |
| C | 8.66778100  | -2.32549900 | -5.00364400 |
| C | 8.66380700  | -3.58278700 | -4.30572000 |
| C | 7.41333100  | -4.13902000 | -3.86563800 |
| C | 7.40009600  | -5.06446200 | -2.78153400 |
| C | 6.15335300  | -5.43895000 | -2.18805900 |
| C | 6.13290500  | -5.92752600 | -0.83976100 |
| C | 4.88674500  | -6.03993700 | -0.15376400 |
| C | -6.20435100 | -2.41397700 | -5.24659000 |
| C | -6.20852800 | -3.66429800 | -4.54242000 |
| C | -4.97760200 | -4.21164700 | -4.06866500 |
| C | 8.63715500  | -5.43142700 | -2.14793800 |
| C | 8.61678400  | -5.93000100 | -0.79912900 |
| C | 7.35942300  | -6.04549000 | -0.11184800 |
| C | 7.33650400  | -6.05196000 | 1.31381400  |
| C | 8.57014300  | -5.94458400 | 2.04397900  |
| C | 8.54618800  | -5.46535900 | 3.39969100  |
| C | 9.71238700  | -1.78040800 | 6.67408500  |
| C | 9.70158700  | -0.35234200 | 6.94609200  |
| C | 9.74677500  | -4.24723700 | 5.20273700  |
| C | 9.76905300  | -5.16755300 | 4.07736900  |
| C | 9.69621100  | 3.74827300  | 5.76688900  |



|   |             |             |             |
|---|-------------|-------------|-------------|
| C | 9.69352800  | 2.48182300  | 6.48065600  |
| C | 9.77421800  | 6.16399900  | -0.64660200 |
| C | 9.79927600  | 5.68030200  | -2.01739200 |
| C | 9.73104800  | 6.13011200  | 2.22510000  |
| C | 9.71506100  | 5.61679800  | 3.58518100  |
| C | 9.84093600  | -6.11762900 | -0.08490900 |
| C | 9.81707400  | -6.12565600 | 1.36882600  |
| C | 9.88169900  | -5.11757600 | -2.77722000 |
| C | 9.89552900  | -4.17042900 | -3.88014700 |
| C | 9.89741400  | -0.22447100 | -5.50550000 |
| C | 9.90335900  | -1.66033600 | -5.27669900 |
| C | 9.86910200  | 2.59841600  | -4.96936000 |
| C | 9.84801900  | 3.85127100  | -4.23181900 |
| C | -7.63494900 | -1.84691600 | 6.31855000  |
| C | -7.64795900 | -0.44912600 | 6.59476000  |
| C | -7.45095100 | -4.21877100 | -4.09990300 |
| C | -7.47484500 | 2.45553100  | -5.19349300 |
| C | -7.49499100 | 3.67796400  | -4.46065900 |
| C | -7.44732500 | -0.33585100 | -5.72680000 |
| C | -7.44256400 | -1.74224800 | -5.49511100 |
| C | -7.65794600 | 2.35645400  | 6.14816700  |
| C | -7.65427700 | 3.59740500  | 5.44812400  |
| C | -7.61155400 | 5.91940000  | 1.93918700  |
| C | -7.63024900 | 5.43164700  | 3.27823600  |
| C | -7.56546800 | 5.93552100  | -0.90472700 |
| C | -7.54140300 | 5.46623800  | -2.25084300 |
| C | 10.97823700 | -5.61387800 | 3.46666300  |
| C | 11.00124500 | -6.07536900 | 2.16225200  |
| C | 10.93246900 | -3.71325600 | 5.78832000  |
| C | 10.91592200 | -2.52475000 | 6.49699400  |
| C | 11.05100600 | -6.05581600 | -0.83760700 |
| C | 11.07062400 | -5.57337800 | -2.13440900 |
| C | 10.88994000 | 1.78851100  | 6.82993500  |
| C | 10.89378600 | 0.42301700  | 7.05433900  |
| C | 10.90427300 | 5.30411800  | 4.30786900  |
| C | 10.89529300 | 4.40360200  | 5.35861400  |

|   |              |             |             |
|---|--------------|-------------|-------------|
| C | 10.93737900  | 6.36596700  | 1.50176200  |
| C | 10.95816300  | 6.38203400  | 0.11820300  |
| C | 11.09906600  | -3.61618700 | -4.40813200 |
| C | 11.10277800  | -2.40706600 | -5.08121300 |
| C | 11.09044200  | 0.55547800  | -5.55683400 |
| C | 11.07679700  | 1.91502600  | -5.29894900 |
| C | 11.03355300  | 4.50028300  | -3.77632500 |
| C | 11.00999800  | 5.38151000  | -2.70960900 |
| C | -8.77547800  | 5.12472300  | -2.90392800 |
| C | -8.75191400  | 4.21946200  | -4.02047000 |
| C | -8.82348800  | 6.06354500  | -0.22109500 |
| C | -8.84680600  | 6.05508300  | 1.21640000  |
| C | -8.71223800  | 1.78356300  | -5.48233500 |
| C | -8.69831500  | 0.37204600  | -5.75330500 |
| C | -8.89658600  | 4.15069500  | 4.98221900  |
| C | -8.88449400  | 5.07854300  | 3.88461300  |
| C | -8.89898200  | 0.25834800  | 6.60377700  |
| C | -8.90400600  | 1.67756000  | 6.37761900  |
| C | -8.87278900  | -2.52896600 | 6.05622400  |
| C | -8.68815500  | -2.43127300 | -5.29408800 |
| C | -8.69239100  | -3.68347700 | -4.58837800 |
| C | -10.11679800 | -1.89325500 | 6.35882700  |
| C | -10.13021100 | -0.46696800 | 6.63830700  |
| C | -9.93054500  | -4.28742100 | -4.20674400 |
| C | -9.95497700  | 2.46839800  | -5.30883100 |
| C | -9.97534300  | 3.71444400  | -4.56017700 |
| C | -9.92729200  | -0.35135300 | -5.85126200 |
| C | -9.92205400  | -1.78608400 | -5.61716600 |
| C | -10.14036800 | 2.36825300  | 6.18472700  |
| C | -10.13663600 | 3.63404800  | 5.47047100  |
| C | -10.09303000 | 5.98932300  | 1.91370000  |
| C | -10.11229200 | 5.48871100  | 3.27831300  |
| C | -10.04666500 | 6.00662200  | -0.95883100 |
| C | -10.02229400 | 5.52526500  | -2.33053500 |
| C | -11.20616800 | 5.21522100  | -3.06270700 |
| C | -11.18353700 | 4.34259200  | -4.13666700 |

|   |              |             |             |
|---|--------------|-------------|-------------|
| C | -11.25653800 | 6.21202300  | -0.23229900 |
| C | -11.27906400 | 6.20386300  | 1.15138600  |
| C | -11.14156600 | 1.77111100  | -5.68227300 |
| C | -11.12818500 | 0.41226500  | -5.94393500 |
| C | -11.33080800 | 4.27340700  | 5.02381900  |
| C | -11.31895700 | 5.16706600  | 3.96738000  |
| C | -11.33361400 | 0.29459800  | 6.71724300  |
| C | -11.33852700 | 1.66091500  | 6.49847800  |
| C | -11.30586900 | -2.65053200 | 6.14303900  |
| C | -11.28711100 | -3.83653300 | 5.43031000  |
| C | -11.11702400 | -2.54901300 | -5.46293200 |
| C | -11.12113300 | -3.75440500 | -4.78305100 |
| H | 11.91985100  | 6.47129100  | -0.38442600 |
| H | 11.88337700  | 6.44364600  | 2.03511900  |
| H | 11.95622200  | 5.77514400  | -2.34196200 |
| H | 11.86123700  | 5.70385400  | 3.97652000  |
| H | 12.05132100  | 0.06705600  | -5.71040500 |
| H | 12.02747900  | 2.44423300  | -5.25943400 |
| H | 12.06029600  | -1.98324900 | -5.37946000 |
| H | 11.99732200  | 4.23460400  | -4.20758800 |
| H | 11.99900900  | -6.30135700 | -0.36178200 |
| H | 12.03339500  | -5.45734000 | -2.62948900 |
| H | 11.96438100  | -6.31518900 | 1.71475900  |
| H | 12.05378800  | -4.09727000 | -4.20183400 |
| H | 11.84538600  | 4.12902500  | 5.81399000  |
| H | 11.84203600  | 2.31663400  | 6.83113100  |
| H | 11.86339700  | -2.11372700 | 6.84157100  |
| H | 11.89237500  | -4.19220000 | 5.60238800  |
| H | 11.84885600  | -0.07152700 | 7.22361400  |
| H | 11.92406800  | -5.50829400 | 3.99546200  |
| H | -12.23523600 | -4.32626800 | 5.21445800  |
| H | -12.26791300 | -2.25175800 | 6.46060000  |
| H | -12.20257600 | -5.63780400 | 3.60363600  |
| H | -12.28734700 | -0.21119500 | 6.85842000  |
| H | -12.09526100 | -5.59299500 | -3.02463400 |
| H | -12.12807800 | -6.43324700 | -0.75513300 |

|   |              |             |             |
|---|--------------|-------------|-------------|
| H | -12.07560100 | -4.24923300 | -4.61094900 |
| H | -12.16151800 | -6.44555900 | 1.32280500  |
| H | -12.09988000 | 2.28784600  | -5.67332700 |
| H | -12.07651900 | -0.08892200 | -6.13078300 |
| H | -12.12936200 | 4.06692800  | -4.60021700 |
| H | -12.06842600 | -2.14088100 | -5.80012700 |
| H | -12.29588000 | 2.17894200  | 6.47515900  |
| H | -12.29066000 | 3.98972200  | 5.45232700  |
| H | -12.24227500 | 6.27196600  | 1.65436400  |
| H | -12.20306400 | 6.28660500  | -0.76517100 |
| H | -12.27011300 | 5.55326400  | 3.60468200  |
| H | -12.16899400 | 5.59294700  | -2.72256900 |

**(5,5)@Cycle-9**

|   |            |             |             |
|---|------------|-------------|-------------|
| C | 7.33670800 | 0.56463300  | -5.22750000 |
| C | 5.36712100 | 1.93390800  | -5.55230300 |
| C | 6.53982200 | -0.58966600 | -5.20792600 |
| H | 8.41689500 | 0.47420500  | -5.09315600 |
| C | 4.57035800 | 0.78520400  | -5.51515100 |
| H | 4.91416100 | 2.91640200  | -5.67708300 |
| H | 6.99108300 | -1.56681300 | -5.04739900 |
| H | 3.48547500 | 0.87774800  | -5.59499000 |
| C | 2.51015700 | -6.83226700 | -0.68997900 |
| C | 0.95487000 | -7.59843900 | -2.50912600 |
| C | 1.97613600 | -6.79018900 | -2.07080600 |
| C | 2.70447600 | -5.83757300 | -2.93521700 |
| C | 2.06910600 | -4.99132700 | -3.85995600 |
| C | 4.81308400 | -4.71601800 | -3.45056700 |
| C | 2.77362300 | -4.01801100 | -4.57966900 |
| H | 0.98696400 | -5.03430800 | -3.97209300 |
| H | 5.85946600 | -4.51008200 | -3.23881600 |
| H | 2.23740000 | -3.35404000 | -5.25363000 |
| C | 5.14851400 | -0.48888000 | -5.36528000 |
| C | 4.14859900 | -3.85783300 | -4.34265400 |
| C | 4.22981800 | -1.69287700 | -5.37470200 |
| H | 3.87715000 | -1.90680000 | -6.40149700 |

|   |             |              |             |
|---|-------------|--------------|-------------|
| H | 3.34137300  | -1.47505400  | -4.75892500 |
| O | 4.91453500  | -2.84218500  | -4.85704700 |
| C | 4.11761800  | -5.70632000  | -2.74335400 |
| C | 4.76505900  | -6.55665000  | -1.71525800 |
| C | 6.00525600  | -7.12867700  | -1.88832500 |
| S | 7.01360500  | -6.93234300  | -3.36477000 |
| S | 6.75362400  | -8.26826900  | -0.71614200 |
| C | 8.18082600  | -8.18685100  | -2.96575500 |
| H | 8.95297200  | -8.40185100  | -3.70175400 |
| C | 8.06408700  | -8.79078600  | -1.76742200 |
| H | 8.72752100  | -9.56647200  | -1.39025100 |
| S | 0.37458500  | -7.64647000  | -4.21099700 |
| C | -0.72236300 | -9.62646100  | -2.80037600 |
| H | -1.31392200 | -10.50498400 | -2.55061400 |
| S | 0.13108700  | -8.82761100  | -1.48377300 |
| C | -0.61215300 | -9.09360200  | -4.03238500 |
| H | -1.10134200 | -9.47741400  | -4.92538400 |
| C | 2.18635500  | -6.82013600  | 1.73377000  |
| C | 3.92279600  | -6.76046800  | -0.51502300 |
| C | 4.42725200  | -6.77827500  | 0.80316700  |
| H | 5.49526100  | -6.66035100  | 0.97392200  |
| C | 3.58422800  | -6.82407500  | 1.91191600  |
| H | 3.98582600  | -6.77117800  | 2.92249100  |
| C | 1.65999000  | -6.85148100  | 0.43114600  |
| H | 0.58704100  | -6.82035400  | 0.26793200  |
| O | 1.44087300  | -6.71050400  | 2.87471200  |
| C | 2.06313200  | 6.32488200   | 1.17377800  |
| C | 3.47889000  | 6.81207200   | -1.23030500 |
| C | 3.45382500  | 6.10252600   | 1.10471800  |
| H | 3.92913700  | 5.66094300   | 1.97708200  |
| C | 1.36994900  | 6.75001600   | 0.02697900  |
| H | 0.29253900  | 6.89183800   | 0.03292800  |
| C | 2.08360500  | 6.95918200   | -1.15861500 |
| H | 1.52876600  | 7.21996600   | -2.05920100 |
| C | 4.18557000  | 6.36268100   | -0.06711100 |
| C | 5.65550200  | 6.17467400   | -0.18267500 |

|   |             |             |             |
|---|-------------|-------------|-------------|
| C | 4.24467900  | 7.06900800  | -2.46715900 |
| C | 5.35632200  | 6.11815200  | -2.67414100 |
| C | 6.10081300  | 5.71064300  | -1.52180800 |
| C | 5.67567500  | 5.58987000  | -3.93456000 |
| H | 5.06932200  | 5.82991800  | -4.80633700 |
| C | 7.18034000  | 4.83094200  | -1.72671800 |
| H | 7.76161600  | 4.48033000  | -0.87972900 |
| C | 7.51452400  | 4.32340300  | -2.98744200 |
| H | 8.33535100  | 3.61481200  | -3.06431200 |
| C | 6.75109100  | 4.70048700  | -4.10162100 |
| O | 6.98789400  | 4.29557400  | -5.39760300 |
| C | 6.76446800  | 1.83221100  | -5.42474600 |
| C | 7.65859600  | 3.04672900  | -5.61927500 |
| C | 4.02876100  | 8.15663200  | -3.28152000 |
| C | 6.53570000  | 6.48131200  | 0.83635600  |
| S | 5.03074700  | 8.55221300  | -4.72361400 |
| S | 2.80482700  | 9.43344900  | -2.94663500 |
| S | 6.04726300  | 7.05069500  | 2.46976600  |
| S | 8.32450600  | 6.47961600  | 0.64713100  |
| C | 3.41514200  | 10.58983800 | -4.12649500 |
| H | 2.93428500  | 11.56532500 | -4.16396600 |
| C | 4.42068200  | 10.19144400 | -4.92898500 |
| H | 4.87340300  | 10.79742700 | -5.71133300 |
| C | 8.69208200  | 7.21076200  | 2.20040700  |
| H | 9.73931500  | 7.40091400  | 2.42654400  |
| C | 7.66019100  | 7.47283900  | 3.02550700  |
| H | 7.74664500  | 7.90863200  | 4.01878500  |
| H | 7.97365600  | 3.10514100  | -6.67256000 |
| H | 8.57590700  | 2.96013700  | -5.01372300 |
| O | 1.47404100  | 6.05176400  | 2.38023500  |
| C | 0.04679900  | 6.22331500  | 2.47110800  |
| H | -0.44218400 | 5.68516200  | 1.64283500  |
| H | -0.20316800 | 7.29534200  | 2.37476200  |
| C | -0.44564200 | 5.64588000  | 3.79338900  |
| H | -0.00330700 | 6.19432800  | 4.63930000  |
| H | -0.09850800 | 4.60499700  | 3.86375700  |

|   |             |             |            |
|---|-------------|-------------|------------|
| C | -1.98529800 | 5.67715000  | 3.85420000 |
| H | -2.34061800 | 6.71295300  | 3.98904000 |
| H | -2.38385700 | 5.33476300  | 2.88487200 |
| C | -2.56787400 | 4.76854000  | 4.94849500 |
| H | -2.26484400 | 5.12727300  | 5.94707200 |
| H | -2.13010500 | 3.76392200  | 4.83153900 |
| C | -4.10002500 | 4.64967500  | 4.86949100 |
| H | -4.57073100 | 5.60538200  | 5.15827500 |
| H | -4.38683400 | 4.46631900  | 3.82059600 |
| C | -4.65690500 | 3.50735700  | 5.73260100 |
| H | -4.41645300 | 3.68636400  | 6.79531300 |
| H | -4.14256700 | 2.57237600  | 5.45065300 |
| C | -6.17059700 | 3.30392400  | 5.56565300 |
| H | -6.70905100 | 4.22144800  | 5.86089000 |
| H | -6.39181900 | 3.14608200  | 4.49919400 |
| C | 0.01083300  | -6.56878500 | 2.75441700 |
| H | -0.23583100 | -5.91626800 | 1.90478200 |
| H | -0.44272500 | -7.55946200 | 2.57235700 |
| C | -0.52791600 | -5.91709200 | 4.02347400 |
| H | -0.30184700 | -6.54008400 | 4.90287200 |
| H | -0.00900800 | -4.95585200 | 4.15824700 |
| C | -2.04229600 | -5.67296900 | 3.89808500 |
| H | -2.57956700 | -6.63704300 | 3.89968100 |
| H | -2.25075200 | -5.20371600 | 2.92193800 |
| C | -2.60747600 | -4.75698000 | 4.99381900 |
| H | -2.40696900 | -5.18555600 | 5.99077200 |
| H | -2.07181200 | -3.79458400 | 4.95322100 |
| C | -4.11501200 | -4.50267000 | 4.82261500 |
| H | -4.67847700 | -5.41871800 | 5.07111400 |
| H | -4.32378400 | -4.29050600 | 3.76180700 |
| C | -4.63298100 | -3.32917200 | 5.66816600 |
| H | -4.46570200 | -3.53806100 | 6.73959100 |
| H | -4.04050400 | -2.42895000 | 5.42980900 |
| C | -6.11877800 | -3.02569100 | 5.42198400 |
| H | -6.71866200 | -3.93530200 | 5.60154700 |
| H | -6.25944200 | -2.76963100 | 4.36143900 |

|   |              |             |             |
|---|--------------|-------------|-------------|
| C | -6.65704900  | -1.88578400 | 6.29951100  |
| H | -5.99015900  | -1.01088300 | 6.22814500  |
| H | -6.64086100  | -2.20100200 | 7.35694000  |
| C | -6.70275200  | 2.11323200  | 6.37868800  |
| H | -6.04751700  | 1.23929500  | 6.22980700  |
| H | -6.65664200  | 2.35268700  | 7.45470000  |
| C | -8.14812000  | 1.70558400  | 5.99378800  |
| H | -8.12872300  | 1.25212400  | 4.99157600  |
| H | -8.76729300  | 2.61612400  | 5.92008700  |
| C | -8.75271600  | 0.76317000  | 7.00685400  |
| H | -9.19783400  | 1.24068500  | 7.88609900  |
| C | -8.72604000  | -0.58144500 | 6.97033800  |
| H | -9.15189700  | -1.12333500 | 7.82151200  |
| C | -8.09127100  | -1.44524100 | 5.90762300  |
| H | -8.70634900  | -2.34863800 | 5.75209200  |
| H | -8.04727400  | -0.91972400 | 4.94287700  |
| C | -12.72586300 | -2.02245700 | 0.46411400  |
| C | -12.54988200 | -2.73711900 | -0.70595000 |
| C | -11.23699900 | -2.93696900 | -1.24589400 |
| C | -10.14155800 | -2.79928300 | -0.34133900 |
| C | -10.32543300 | -2.05460000 | 0.87940300  |
| C | -11.59814900 | -1.47032800 | 1.15568400  |
| C | -8.79824500  | -3.02744400 | -0.80402300 |
| C | -8.53155800  | -2.90968700 | -2.19994100 |
| C | -9.61968200  | -2.56895700 | -3.07720200 |
| C | -10.96518600 | -2.81778800 | -2.67043600 |
| C | -9.36757100  | -1.63049400 | -4.14183200 |
| C | -10.46936200 | -0.97119800 | -4.76536900 |
| C | -11.75366200 | -1.59437800 | -4.63433900 |
| C | -11.99536000 | -2.49410000 | -3.61320500 |
| C | -9.15542500  | -1.57910100 | 1.56781500  |
| C | -7.88673900  | -2.20341400 | 1.33411700  |
| C | -7.70273000  | -2.94910900 | 0.11625100  |
| C | -6.37395100  | -3.18403600 | -0.34970300 |
| C | -6.10444600  | -3.06574700 | -1.75797900 |
| C | -7.17809700  | -2.71684900 | -2.63148100 |



|   |             |             |             |
|---|-------------|-------------|-------------|
| C | -6.92621600 | -1.77875300 | -3.69432700 |
| C | -8.04195600 | -1.08530400 | -4.26763700 |
| C | -6.73267400 | -1.72717600 | 2.02341100  |
| C | -5.45731600 | -2.33704500 | 1.77554400  |
| C | -5.27454800 | -3.08222300 | 0.56789800  |
| C | -3.93947400 | -3.32360300 | 0.10328600  |
| C | -3.66940900 | -3.20643400 | -1.30608100 |
| C | -4.74888100 | -2.85166300 | -2.18155000 |
| C | -4.49839700 | -1.91788500 | -3.23783900 |
| C | -5.61347700 | -1.23426700 | -3.83057600 |
| C | -4.30128500 | -1.86577200 | 2.47880600  |
| C | -1.51169600 | -3.45116200 | 0.55409400  |
| C | -1.24236900 | -3.33905000 | -0.84834500 |
| C | -2.32115900 | -2.99619900 | -1.73003100 |
| C | -2.06888500 | -2.05756700 | -2.79220000 |
| C | -3.17809100 | -1.37398700 | -3.37893400 |
| C | -1.87706700 | -2.00263700 | 2.93536100  |
| C | -0.60467300 | -2.61870400 | 2.69682300  |
| C | -0.41718500 | -3.35410800 | 1.47580600  |
| C | 0.91263100  | -3.58912300 | 1.01368700  |
| C | 1.18218700  | -3.47989000 | -0.39474400 |
| C | 0.11205700  | -3.13551900 | -1.27397100 |
| C | 0.36431700  | -2.19433100 | -2.33413500 |
| C | -0.74952300 | -1.50669700 | -2.92112000 |
| C | 0.54712700  | -2.14968800 | 3.39970300  |
| C | 1.82124900  | -2.75881000 | 3.15042500  |
| C | 2.00573900  | -3.49008700 | 1.93474800  |
| C | 3.34004800  | -3.72859500 | 1.47042400  |
| C | 3.60910200  | -3.61673500 | 0.06553100  |
| C | 2.53418000  | -3.26455900 | -0.81396800 |
| C | 2.78396600  | -2.32207900 | -1.85766300 |
| C | 1.67515900  | -1.64331300 | -2.45841800 |
| C | 2.98101900  | -2.28819500 | 3.85408100  |
| C | 4.24829800  | -2.89547000 | 3.60352100  |
| C | 4.43074600  | -3.63472600 | 2.38441000  |
| C | 5.76477500  | -3.86179500 | 1.91597800  |

|   |             |             |             |
|---|-------------|-------------|-------------|
| C | 6.03043000  | -3.74801300 | 0.52000600  |
| C | 4.95339300  | -3.40565200 | -0.35589300 |
| C | 5.20480700  | -2.46337900 | -1.40913200 |
| C | 4.10054300  | -1.77558200 | -1.98895500 |
| C | 5.41275500  | -2.40989700 | 4.28479700  |
| C | 6.69089400  | -3.02642100 | 4.04778900  |
| C | 6.87139900  | -3.77726700 | 2.83022800  |
| C | 8.19392400  | -4.05993100 | 2.37267400  |
| C | 8.46357600  | -3.94795100 | 0.94625800  |
| C | 7.38985000  | -3.55584800 | 0.09200500  |
| C | 7.64319100  | -2.61610400 | -0.97208500 |
| C | 6.52123200  | -1.92186700 | -1.54505900 |
| C | 7.83915200  | -2.58007500 | 4.76888100  |
| C | 9.06991700  | -3.26949200 | 4.51450600  |
| C | 9.24235100  | -3.99082300 | 3.34769800  |
| C | 8.96226500  | -2.09896300 | -1.14717700 |
| C | 10.03469800 | -2.86321800 | -0.58115700 |
| C | 9.79160400  | -3.76497700 | 0.43845300  |
| C | 6.66097300  | -0.53823400 | -1.85328600 |
| C | 7.91564300  | 0.09991000  | -1.56461900 |
| C | 9.10393900  | -0.68201600 | -1.45275400 |
| C | 4.24254800  | -0.38737800 | -2.31085000 |
| C | 5.48194600  | 0.25375000  | -2.02565100 |
| C | 5.45397700  | 1.57492200  | -1.46676900 |
| C | 6.60282200  | 2.01788800  | -0.74043100 |
| C | 7.88443000  | 1.42006600  | -0.98995400 |
| C | 9.04407500  | 1.92718500  | -0.33169400 |
| C | 10.29344300 | 1.30304000  | -0.65695200 |
| C | 10.32207400 | 0.03147900  | -1.20066500 |
| C | 6.41674000  | 2.74927300  | 0.46340000  |
| C | 7.52218000  | 2.86771400  | 1.37181700  |
| C | 8.85493600  | 2.68472100  | 0.89664500  |
| C | 4.19304400  | 2.19896800  | -1.23414300 |
| C | 4.00413800  | 2.92909500  | -0.01116800 |
| C | 5.08629800  | 3.01681600  | 0.91237900  |
| C | 4.81461600  | 2.91185100  | 2.32096100  |

|   |             |             |             |
|---|-------------|-------------|-------------|
| C | 5.89251700  | 2.55653800  | 3.19755000  |
| C | 7.25294800  | 2.77027600  | 2.78259300  |
| C | 8.32580200  | 2.47243000  | 3.67447600  |
| C | 9.65142000  | 2.75543800  | 3.20571000  |
| C | 9.90899400  | 2.86082600  | 1.85174100  |
| C | 5.64554400  | 1.62625100  | 4.24902200  |
| C | 6.76926900  | 0.94893200  | 4.84039000  |
| C | 8.07423800  | 1.52047800  | 4.74565400  |
| C | 3.46834400  | 2.69760800  | 2.73991800  |
| C | 3.21816100  | 1.76512000  | 3.80703400  |
| C | 4.32628100  | 1.08444900  | 4.39548200  |
| C | 4.19112300  | -0.31510300 | 4.70472200  |
| C | 5.38392200  | -1.09855800 | 4.84348600  |
| C | 6.63523100  | -0.45425000 | 5.14259700  |
| C | 7.81005300  | -1.24139100 | 5.33859700  |
| C | 9.01127800  | -0.53620800 | 5.67750600  |
| C | 9.13970000  | 0.80961300  | 5.38970700  |
| C | 2.95238500  | -0.96486500 | 4.41774600  |
| C | 2.66625000  | 3.15342500  | 0.45123300  |
| C | 2.39410800  | 3.02395600  | 1.84870400  |
| C | 3.03363600  | 1.72531200  | -1.93568800 |
| C | 3.05865200  | 0.40283600  | -2.48067900 |
| C | 1.90076800  | 1.21257800  | 3.93913800  |
| C | 1.76361900  | -0.17717900 | 4.25410800  |
| C | 1.57557600  | 3.07607300  | -0.47530700 |
| C | 1.76166400  | 2.34333100  | -1.69915900 |
| C | 1.81556400  | -0.24724600 | -2.77997800 |
| C | 1.04284000  | 2.81572300  | 2.27047000  |
| C | 0.78818300  | 1.89478000  | 3.34500400  |
| C | 0.51700400  | -0.82777900 | 3.96820600  |
| C | 0.24505100  | 3.30142300  | -0.01125100 |
| C | -0.02716500 | 3.15836000  | 1.39242800  |
| C | 0.60687000  | 1.86633700  | -2.39437400 |
| C | 0.63378200  | 0.53827200  | -2.94898700 |
| C | -0.52501700 | 1.35343100  | 3.48646200  |
| C | -0.66478100 | -0.04203600 | 3.80742200  |

|   |             |             |             |
|---|-------------|-------------|-------------|
| C | -0.85135800 | 3.21082200  | -0.93082900 |
| C | -0.66784600 | 2.47599200  | -2.14656800 |
| C | -0.61259900 | -0.11424200 | -3.23295400 |
| C | -1.37950000 | 2.95065100  | 1.81567600  |
| C | -1.63391600 | 2.03087400  | 2.88136200  |
| C | -1.90839400 | -0.68963800 | 3.50601900  |
| C | -2.18708100 | 3.44718000  | -0.46402300 |
| C | -2.45716700 | 3.31461100  | 0.94300900  |
| C | -1.82872600 | 2.00036600  | -2.84324800 |
| C | -1.80059800 | 0.67343200  | -3.40037200 |
| C | -2.95534000 | 1.49401400  | 3.02685600  |
| C | -3.09603500 | 0.09897900  | 3.34900400  |
| C | -3.27960900 | 3.35734800  | -1.38025700 |
| C | -3.09593500 | 2.61411700  | -2.59960600 |
| C | -3.04065200 | 0.02522100  | -3.69030100 |
| C | -3.80490400 | 3.11205600  | 1.36919500  |
| C | -4.05891600 | 2.17591000  | 2.43262900  |
| C | -4.33391500 | -0.54788500 | 3.05342900  |
| C | -4.61549000 | 3.58496100  | -0.91019300 |
| C | -4.88275600 | 3.46243900  | 0.49131900  |
| C | -4.25817500 | 2.13187200  | -3.28779100 |
| C | -4.22983600 | 0.81274700  | -3.84419000 |
| C | -5.37648000 | 1.62957600  | 2.56349700  |
| C | -5.51753900 | 0.24240400  | 2.88316200  |
| C | -5.71445800 | 3.49573900  | -1.82981000 |
| C | -5.53124800 | 2.75104500  | -3.04727800 |
| C | -5.47594400 | 0.16397400  | -4.14071200 |
| C | -6.23803800 | 3.25994000  | 0.91947400  |
| C | -6.48986800 | 2.31915500  | 1.97691300  |
| C | -6.76241800 | -0.40557000 | 2.58812800  |
| C | -7.04343300 | 3.72862400  | -1.36300700 |
| C | -7.31201800 | 3.60866600  | 0.04645700  |
| C | -6.68619300 | 2.27499300  | -3.73770000 |
| C | -6.65766000 | 0.94921200  | -4.29849500 |
| C | -7.80243200 | 1.77810700  | 2.11593800  |
| C | -7.94186400 | 0.38000500  | 2.42718200  |

|   |              |             |             |
|---|--------------|-------------|-------------|
| C | -8.14245000  | 3.61719500  | -2.27608000 |
| C | -7.96081600  | 2.87883900  | -3.48243700 |
| C | -7.90553100  | 0.30046400  | -4.57449000 |
| C | -8.66434000  | 3.38524300  | 0.46607500  |
| C | -8.91364600  | 2.45628800  | 1.51898300  |
| C | -9.18356300  | -0.26621500 | 2.12374100  |
| C | -9.48457400  | 3.85761100  | -1.81642600 |
| C | -9.75322100  | 3.73850500  | -0.40517700 |
| C | -9.12866200  | 2.41142200  | -4.18057300 |
| C | -9.10006400  | 1.08462400  | -4.74304500 |
| C | -10.24071200 | 1.91877100  | 1.65983200  |
| C | -10.37951500 | 0.51790400  | 1.97096000  |
| C | -10.57167700 | 3.80629600  | -2.73991800 |
| C | -10.38624000 | 3.05353900  | -3.97132100 |
| C | -10.33006500 | 0.44286400  | -5.07851100 |
| C | -11.10009300 | 3.57185400  | 0.03753600  |
| C | -11.35389800 | 2.62497200  | 1.11306800  |
| C | -11.62636600 | -0.13123800 | 1.72458100  |
| C | -11.87525400 | 4.09873300  | -2.22024700 |
| C | -12.13277700 | 3.98468200  | -0.86690700 |
| C | -11.49678900 | 2.56313600  | -4.73358000 |
| C | -11.46937200 | 1.29082200  | -5.27316500 |
| C | -12.65058400 | 2.05235800  | 1.32751000  |
| C | -12.78343200 | 0.70924200  | 1.62566800  |
| C | -2.84889000  | -3.22329500 | 1.02003900  |
| C | -3.03447500  | -2.47661000 | 2.23559300  |
| H | 10.48979900  | 2.72509700  | 3.90111300  |
| H | 10.94341300  | 2.91457500  | 1.51361500  |
| H | 9.88807100   | -1.08936900 | 6.01280000  |
| H | 10.11471200  | 1.28232200  | 5.50439200  |
| H | 10.23542000  | -4.36643800 | 3.10290000  |
| H | 9.93140600   | -3.09616000 | 5.15867300  |
| H | 11.22772800  | 1.75525700  | -0.32541400 |
| H | 11.27851800  | -0.48450400 | -1.28101200 |
| H | 11.06631300  | -2.62037200 | -0.83461900 |
| H | 10.63796300  | -4.20990200 | 0.96083500  |

|   |              |             |             |
|---|--------------|-------------|-------------|
| H | -12.70954000 | 4.25240500  | -2.90396300 |
| H | -13.16321800 | 4.05116100  | -0.51921700 |
| H | -13.54404100 | 2.63164800  | 1.09672400  |
| H | -13.77800900 | 0.26440500  | 1.62226700  |
| H | -13.73547200 | -1.74442900 | 0.76490300  |
| H | -13.42549500 | -3.00393400 | -1.29691600 |
| H | -13.01749200 | -2.82668300 | -3.43495800 |
| H | -12.59158700 | -1.24092000 | -5.23439000 |
| H | -12.38260000 | 0.88141400  | -5.70392400 |
| H | -12.43087400 | 3.12370800  | -4.75310900 |

**(6,6)@Cycle-9**

|   |             |             |             |
|---|-------------|-------------|-------------|
| C | 1.41357000  | 1.10734600  | -7.05016700 |
| C | -0.58812200 | 2.46697800  | -7.13459200 |
| C | 0.63019500  | -0.04801500 | -6.89656900 |
| H | 2.50230700  | 1.02104000  | -7.06783500 |
| C | -1.36810000 | 1.32000800  | -6.96764900 |
| H | -1.05589000 | 3.44753500  | -7.21753500 |
| H | 1.10140200  | -1.02231600 | -6.78218700 |
| H | -2.45464300 | 1.40848000  | -6.90732200 |
| C | -2.72891100 | -6.78353200 | -2.35541900 |
| C | -4.62095600 | -7.25200100 | -3.93962300 |
| C | -3.50078800 | -6.52978900 | -3.59545400 |
| C | -2.89555700 | -5.49353800 | -4.46139300 |
| C | -3.64808700 | -4.53970900 | -5.17047300 |
| C | -0.87104000 | -4.32605400 | -5.17984200 |
| C | -3.04637700 | -3.49801700 | -5.88609700 |
| H | -4.73422100 | -4.55309100 | -5.10270900 |
| H | 0.20173500  | -4.15762800 | -5.11994900 |
| H | -3.67053700 | -2.76305600 | -6.38798600 |
| C | -0.76976900 | 0.04857800  | -6.87695000 |
| C | -1.64659200 | -3.36847900 | -5.85435000 |
| C | -1.68435400 | -1.15415200 | -6.78160300 |
| H | -2.16923800 | -1.34894100 | -7.75716500 |
| H | -2.48350500 | -0.94412900 | -6.05344000 |
| O | -0.94507100 | -2.31433800 | -6.38120800 |

|   |             |              |             |
|---|-------------|--------------|-------------|
| C | -1.46866800 | -5.39750000  | -4.50005600 |
| C | -0.68175000 | -6.38926500  | -3.73029900 |
| C | 0.47824400  | -6.95430600  | -4.21370100 |
| S | 1.20341100  | -6.55927900  | -5.81189200 |
| S | 1.37525900  | -8.27330700  | -3.38382100 |
| C | 2.36101200  | -7.88419500  | -5.82906800 |
| H | 2.97293400  | -7.99991400  | -6.72139200 |
| C | 2.43949200  | -8.65949000  | -4.73059000 |
| H | 3.12437500  | -9.49509700  | -4.60128400 |
| S | -5.48633400 | -7.07416600  | -5.50687800 |
| C | -6.40112700 | -9.19900700  | -4.18191300 |
| H | -6.97287000 | -10.09347900 | -3.94274300 |
| S | -5.31106200 | -8.58388200  | -2.94425200 |
| C | -6.48056600 | -8.51692200  | -5.34046800 |
| H | -7.12599000 | -8.77731400  | -6.17696800 |
| C | -2.59025100 | -7.22458600  | 0.04929200  |
| C | -1.30385700 | -6.75930200  | -2.43995500 |
| C | -0.56538700 | -7.01630400  | -1.26535100 |
| H | 0.51941600  | -6.93374100  | -1.28308100 |
| C | -1.18631200 | -7.26832200  | -0.04368200 |
| H | -0.60204400 | -7.41486300  | 0.86338300  |
| C | -3.35284700 | -6.99578900  | -1.11027300 |
| H | -4.43327800 | -6.90797500  | -1.04038400 |
| O | -3.10491100 | -7.36154400  | 1.30760900  |
| C | -1.30897900 | 7.34982700   | 0.52764000  |
| C | -0.60470000 | 7.74266000   | -2.18418200 |
| C | -0.01831700 | 7.02009300   | 0.07042800  |
| H | 0.65369800  | 6.55600600   | 0.78572300  |
| C | -2.26409400 | 7.84760200   | -0.37696000 |
| H | -3.27813000 | 8.07889600   | -0.06043600 |
| C | -1.89932600 | 8.02487900   | -1.71697100 |
| H | -2.65727800 | 8.36160800   | -2.42372300 |
| C | 0.35842300  | 7.20350000   | -1.26998500 |
| C | 1.68110900  | 6.80342200   | -1.81708500 |
| C | -0.20903800 | 7.92935000   | -3.59728300 |
| C | 0.64117600  | 6.83305700   | -4.10539300 |

|   |             |             |             |
|---|-------------|-------------|-------------|
| C | 1.60862400  | 6.28366300  | -3.20718500 |
| C | 0.49404000  | 6.28602400  | -5.38905200 |
| H | -0.27891700 | 6.65033100  | -6.06343800 |
| C | 2.37887900  | 5.20069300  | -3.66347700 |
| H | 3.08611300  | 4.72858900  | -2.99049000 |
| C | 2.23843600  | 4.65643600  | -4.94472900 |
| H | 2.83156200  | 3.78530800  | -5.21158600 |
| C | 1.29858400  | 5.21697400  | -5.82412100 |
| O | 1.08987500  | 4.82375700  | -7.12575700 |
| C | 0.81460600  | 2.36815600  | -7.20238900 |
| C | 1.64904100  | 3.58085500  | -7.57796600 |
| C | -0.51269200 | 9.05424800  | -4.32543400 |
| C | 2.87209700  | 6.93093000  | -1.13146900 |
| S | 0.05693300  | 9.35438500  | -6.00607000 |
| S | -1.41060800 | 10.46446900 | -3.65825900 |
| S | 3.02577200  | 7.51215700  | 0.56136600  |
| S | 4.48291200  | 6.62795000  | -1.87358300 |
| C | -1.04404300 | 11.56128400 | -4.98690700 |
| H | -1.38869400 | 12.58939300 | -4.89517200 |
| C | -0.38128200 | 11.05990700 | -6.04683400 |
| H | -0.11114700 | 11.62295400 | -6.93803100 |
| C | 5.44064700  | 7.07524700  | -0.47383800 |
| H | 6.52141700  | 6.98302100  | -0.55887200 |
| C | 4.78123400  | 7.47886500  | 0.62934900  |
| H | 5.24895900  | 7.77047400  | 1.56741700  |
| H | 1.66130400  | 3.68801100  | -8.67353300 |
| H | 2.69531600  | 3.46305900  | -7.25183900 |
| O | -1.54473400 | 7.11020500  | 1.85508300  |
| C | -2.90072600 | 7.24804600  | 2.32144200  |
| H | -3.57654400 | 6.71080400  | 1.63615300  |
| H | -3.18913800 | 8.31478000  | 2.31926900  |
| C | -3.00148600 | 6.63324300  | 3.71409500  |
| H | -2.43969000 | 7.23802500  | 4.44279900  |
| H | -2.52578700 | 5.64387100  | 3.68003200  |
| C | -4.47145700 | 6.47347400  | 4.14343300  |
| H | -4.92411100 | 7.46039700  | 4.34048400  |



|   |             |             |            |
|---|-------------|-------------|------------|
| H | -5.03773500 | 6.03354500  | 3.30570000 |
| C | -4.64846800 | 5.55734100  | 5.36552400 |
| H | -4.15072800 | 5.99490400  | 6.24773100 |
| H | -4.13589200 | 4.60349300  | 5.16049800 |
| C | -6.12802600 | 5.26909300  | 5.67451400 |
| H | -6.61536000 | 6.17741900  | 6.06937900 |
| H | -6.64333300 | 5.02752500  | 4.73131900 |
| C | -6.32941700 | 4.09693300  | 6.64777600 |
| H | -5.89133000 | 4.33926000  | 7.63185100 |
| H | -5.77246700 | 3.22546500  | 6.26515700 |
| C | -7.80566900 | 3.70281100  | 6.81553200 |
| H | -8.36752900 | 4.53740000  | 7.27074400 |
| H | -8.24810100 | 3.53848000  | 5.82096200 |
| C | -4.50177200 | -7.07554500 | 1.52367100 |
| H | -4.79527900 | -6.18518700 | 0.94647500 |
| H | -5.11582500 | -7.92724300 | 1.17979800 |
| C | -4.68616700 | -6.79073400 | 3.01144400 |
| H | -4.34986900 | -7.65594600 | 3.60324700 |
| H | -4.02176100 | -5.95036800 | 3.26410600 |
| C | -6.14201000 | -6.41578400 | 3.36282300 |
| H | -6.76067000 | -7.32411000 | 3.45481200 |
| H | -6.57622900 | -5.82284900 | 2.54246300 |
| C | -6.21451400 | -5.57665900 | 4.65013200 |
| H | -5.83138700 | -6.16227500 | 5.50364600 |
| H | -5.52745700 | -4.72369500 | 4.53107400 |
| C | -7.61277200 | -5.02534300 | 4.98114900 |
| H | -8.28071800 | -5.83986200 | 5.31067700 |
| H | -8.06125800 | -4.60313000 | 4.06757200 |
| C | -7.54091700 | -3.92786400 | 6.05683900 |
| H | -7.12958300 | -4.35245900 | 6.98960900 |
| H | -6.81776300 | -3.16492300 | 5.72340700 |
| C | -8.87679900 | -3.23030300 | 6.35385200 |
| H | -9.61098600 | -3.96201800 | 6.73478100 |
| H | -9.29364500 | -2.82854200 | 5.41855900 |
| C | -8.71461000 | -2.09015900 | 7.37274400 |
| H | -7.88506300 | -1.43251300 | 7.06385400 |

|   |              |             |             |
|---|--------------|-------------|-------------|
| H | -8.42504400  | -2.51464700 | 8.34960900  |
| C | -7.99119300  | 2.43962400  | 7.67101900  |
| H | -7.34757000  | 1.63075200  | 7.28698700  |
| H | -7.64838800  | 2.64565300  | 8.69981500  |
| C | -9.45631700  | 1.93414700  | 7.70439400  |
| H | -9.70372800  | 1.48521300  | 6.73107700  |
| H | -10.12126000 | 2.80783400  | 7.83342600  |
| C | -9.68714700  | 0.96714900  | 8.83828000  |
| H | -9.61542800  | 1.41590900  | 9.83545400  |
| C | -9.91261500  | -0.35726100 | 8.77041500  |
| H | -10.00654800 | -0.90106100 | 9.71697400  |
| C | -9.98801200  | -1.22469600 | 7.53899400  |
| H | -10.86092600 | -1.89735200 | 7.62077000  |
| H | -10.13134700 | -0.62509000 | 6.62824400  |
| H | -10.52729200 | 3.62958100  | -3.70183700 |
| H | -10.61202900 | 1.42919300  | -4.73234000 |
| H | -10.79133600 | -0.69673900 | -4.55569500 |
| H | -11.06431000 | -2.67575000 | -3.17013600 |
| H | -11.30065100 | -3.56707500 | -1.23586900 |
| H | -11.49143200 | -3.34401200 | 1.17802600  |
| H | -10.57851000 | 4.85152900  | -1.94374200 |
| H | -10.76376200 | 5.05871600  | 0.47159800  |
| H | -10.99124600 | 4.19024900  | 2.42241600  |
| H | -11.26947700 | 2.21794100  | 3.82137200  |
| H | -11.46184000 | 0.07368200  | 3.99140500  |
| H | -11.54548300 | -2.12051400 | 2.94107900  |
| C | -9.60541000  | 3.05590700  | -3.78921200 |
| C | -9.65360500  | 1.80422600  | -4.37541500 |
| C | -9.90519900  | -1.16087100 | -4.12446000 |
| C | -10.06047200 | -2.28668100 | -3.33622000 |
| C | -10.38982900 | -3.52937800 | -0.63953900 |
| C | -10.49869900 | -3.40229700 | 0.73345200  |
| C | -9.67657400  | 4.76166100  | -1.33958000 |
| C | -9.78218700  | 4.87949400  | 0.03455200  |
| C | -10.10444000 | 3.64382900  | 2.74110000  |
| C | -10.26324500 | 2.52300900  | 3.53689500  |

|   |              |             |             |
|---|--------------|-------------|-------------|
| C | -10.52749500 | -0.44703700 | 3.78610000  |
| C | -10.57446400 | -1.69279500 | 3.18668800  |
| C | -8.41566500  | 3.51897100  | -3.14351500 |
| C | -8.51511700  | 0.93812800  | -4.35145500 |
| C | -8.63772900  | -0.50533700 | -4.22741900 |
| C | -8.95797400  | -2.82695800 | -2.60191600 |
| C | -9.11868400  | -3.43126300 | -1.28906800 |
| C | -9.34251400  | -3.16712600 | 1.54253500  |
| C | -8.45044300  | 4.34896000  | -1.95040600 |
| C | -8.66804300  | 4.59056000  | 0.88362100  |
| C | -8.82608000  | 3.98330700  | 2.19547400  |
| C | -9.15274100  | 1.67315000  | 3.83614100  |
| C | -9.28122500  | 0.23187900  | 3.96767100  |
| C | -9.37925800  | -2.33353800 | 2.73174000  |
| C | -7.19905000  | 2.84288200  | -3.46461300 |
| C | -7.24980200  | 1.53977900  | -4.07288300 |
| C | -7.48750000  | -1.25317200 | -3.82956600 |
| C | -7.64920400  | -2.42502900 | -3.00945300 |
| C | -7.95984100  | -3.59427000 | -0.47055900 |
| C | -8.07268700  | -3.45772100 | 0.95732800  |
| C | -7.26612200  | 4.44754700  | -1.15792200 |
| C | -7.37715500  | 4.56498100  | 0.27163700  |
| C | -7.68417500  | 3.38055000  | 2.80423200  |
| C | -7.84886300  | 2.21907300  | 3.63453600  |
| C | -8.09646900  | -0.56164200 | 3.89427700  |
| C | -8.14489000  | -1.85069200 | 3.26262200  |
| C | -5.95604600  | 3.29179000  | -2.89652300 |
| C | -6.05549900  | 0.73892300  | -4.08468100 |
| C | -6.17647100  | -0.67577600 | -3.95800700 |
| C | -6.49313100  | -2.97059600 | -2.35053200 |
| C | -6.65103000  | -3.56258600 | -1.06404000 |
| C | -6.87260000  | -3.29357500 | 1.73086300  |
| C | -5.98994700  | 4.10427000  | -1.72673300 |
| C | -6.20682000  | 4.32715200  | 1.07240400  |
| C | -6.36346000  | 3.72192300  | 2.35166600  |
| C | -6.68725100  | 1.45229600  | 3.98870300  |

|   |             |             |             |
|---|-------------|-------------|-------------|
| C | -6.81235900 | 0.04121400  | 4.12603800  |
| C | -6.90922500 | -2.48554400 | 2.90015400  |
| C | -4.72680500 | 2.65768400  | -3.26954000 |
| C | -4.77932200 | 1.35461300  | -3.87291500 |
| C | -5.01918600 | -1.44661700 | -3.61615800 |
| C | -5.18042100 | -2.61498000 | -2.79603100 |
| C | -5.49290400 | -3.78677300 | -0.25299800 |
| C | -5.60536900 | -3.65106000 | 1.17175100  |
| C | -4.79390000 | 4.26291500  | -0.95452200 |
| C | -4.90672300 | 4.36812000  | 0.47342700  |
| C | -5.21870300 | 3.17464000  | 3.01140400  |
| C | -5.38289400 | 2.02496300  | 3.85285600  |
| C | -5.62935200 | -0.76560100 | 4.11925800  |
| C | -5.67956200 | -2.05508900 | 3.49206900  |
| C | -3.49453300 | 3.11399200  | -2.70889600 |
| C | -3.59762700 | 0.55364900  | -3.88963400 |
| C | -3.72220300 | -0.86912700 | -3.74886400 |
| C | -4.03895600 | -3.16090900 | -2.13739000 |
| C | -4.19707800 | -3.75798900 | -0.84584400 |
| C | -4.42139600 | -3.51291100 | 1.95486600  |
| C | -3.52892800 | 3.92975900  | -1.52750800 |
| C | -3.75157100 | 4.13287200  | 1.27780500  |
| C | -3.91155100 | 3.52820500  | 2.56728500  |
| C | -4.23332300 | 1.26217400  | 4.21893900  |
| C | -4.35772100 | -0.16106900 | 4.35486800  |
| C | -4.45813900 | -2.70236700 | 3.13749400  |
| C | -2.26628500 | 2.46327800  | -3.06818700 |
| C | -2.31981200 | 1.16471000  | -3.66321800 |
| C | -2.56534200 | -1.63471200 | -3.38797500 |
| C | -2.72665000 | -2.79166600 | -2.57139200 |
| C | -3.03764000 | -3.97339700 | -0.03113500 |
| C | -3.15087800 | -3.85688200 | 1.38708800  |
| C | -2.33542400 | 4.06473100  | -0.74198600 |
| C | -2.44968700 | 4.16376200  | 0.67915300  |
| C | -2.76533400 | 2.97962000  | 3.23005300  |
| C | -2.92684600 | 1.83326200  | 4.06799400  |

|   |             |             |             |
|---|-------------|-------------|-------------|
| C | -3.17054700 | -0.96720900 | 4.32929400  |
| C | -3.22217700 | -2.25854500 | 3.71607700  |
| C | -1.03016900 | 2.91396800  | -2.49965100 |
| C | -1.13758900 | 0.35596800  | -3.68242600 |
| C | -1.26308300 | -1.06360700 | -3.53962300 |
| C | -1.58286100 | -3.34791400 | -1.92089700 |
| C | -1.73950400 | -3.94203000 | -0.62954700 |
| C | -1.96155100 | -3.72511300 | 2.17466500  |
| C | -1.06682100 | 3.72449900  | -1.31445100 |
| C | -1.29487400 | 3.94166600  | 1.49454800  |
| C | -1.45289100 | 3.34580100  | 2.79018800  |
| C | -1.77018800 | 1.06797900  | 4.43049800  |
| C | -1.89363700 | -0.35737500 | 4.56172400  |
| C | -1.99624200 | -2.91046300 | 3.35755100  |
| C | 0.18785500  | 2.25539100  | -2.85067700 |
| C | 0.13545600  | 0.95968900  | -3.46232400 |
| C | -0.11431600 | -1.83587500 | -3.19669500 |
| C | -0.27681300 | -2.99435500 | -2.37049200 |
| C | -0.58502300 | -4.16341800 | 0.17583100  |
| C | -0.69677100 | -4.05796400 | 1.59986900  |
| C | 0.11440200  | 3.84709100  | -0.52422400 |
| C | -0.00014000 | 3.96415900  | 0.89924400  |
| C | -0.31011000 | 2.80443900  | 3.45396400  |
| C | -0.47047800 | 1.64279500  | 4.28268700  |
| C | -0.71123900 | -1.15992200 | 4.53453600  |
| C | -0.76358600 | -2.45918500 | 3.92431600  |
| C | 1.41776900  | 2.68308400  | -2.25838500 |
| C | 1.31577300  | 0.14704700  | -3.48320800 |
| C | 1.19078500  | -1.27153800 | -3.35456700 |
| C | 0.86855200  | -3.55726300 | -1.72391300 |
| C | 0.71266000  | -4.14352200 | -0.42940200 |
| C | 0.49823400  | -3.91457700 | 2.37841600  |
| C | 1.38162700  | 3.49458500  | -1.08544300 |
| C | 1.15898700  | 3.75476800  | 1.71440200  |
| C | 1.00311600  | 3.16597100  | 3.00801800  |
| C | 0.68878900  | 0.87364300  | 4.62996700  |

|   |            |             |             |
|---|------------|-------------|-------------|
| C | 0.56686300 | -0.54659100 | 4.75532700  |
| C | 0.46484100 | -3.10186100 | 3.55512000  |
| C | 2.64321800 | 2.03686600  | -2.62020500 |
| C | 2.59398400 | 0.75017200  | -3.25049800 |
| C | 2.34608400 | -2.05046500 | -3.01187700 |
| C | 2.18219000 | -3.21259600 | -2.18262900 |
| C | 1.87348600 | -4.38151700 | 0.37446300  |
| C | 1.76510900 | -4.26029800 | 1.80224500  |
| C | 2.57148100 | 3.65187200  | -0.30639000 |
| C | 2.46054200 | 3.79215600  | 1.11685000  |
| C | 2.15303500 | 2.62104500  | 3.66831700  |
| C | 1.99333800 | 1.45332900  | 4.48938000  |
| C | 1.75385700 | -1.35094600 | 4.73276600  |
| C | 1.70188600 | -2.65005400 | 4.12249200  |
| C | 3.87131500 | 2.48555800  | -2.04856700 |
| C | 3.77442800 | -0.05437200 | -3.27576500 |
| C | 3.64888800 | -1.48117000 | -3.15619100 |
| C | 3.32511200 | -3.77098100 | -1.53127900 |
| C | 3.16798700 | -4.36493900 | -0.23130100 |
| C | 2.95587900 | -4.11500100 | 2.57753000  |
| C | 3.83518800 | 3.31006300  | -0.87330400 |
| C | 3.61774200 | 3.58425700  | 1.92722400  |
| C | 3.46169400 | 2.98597600  | 3.22405100  |
| C | 3.14796600 | 0.68640900  | 4.83599500  |
| C | 3.02601900 | -0.74003800 | 4.95820100  |
| C | 2.92375100 | -3.29453800 | 3.75686700  |
| C | 5.09823400 | 1.84322500  | -2.41193400 |
| C | 5.04884100 | 0.55405500  | -3.02977600 |
| C | 4.80374500 | -2.25127300 | -2.79742700 |
| C | 4.63992600 | -3.41195300 | -1.97672100 |
| C | 4.33049500 | -4.58320400 | 0.57887700  |
| C | 4.22323100 | -4.45460100 | 1.99986500  |
| C | 5.02687800 | 3.46502600  | -0.09505900 |
| C | 4.91759000 | 3.60618100  | 1.32295500  |
| C | 4.61149300 | 2.42818200  | 3.87393800  |
| C | 4.45251700 | 1.26302200  | 4.68837400  |

|   |            |             |             |
|---|------------|-------------|-------------|
| C | 4.21277400 | -1.54340100 | 4.92602800  |
| C | 4.16090500 | -2.83665600 | 4.31742800  |
| C | 6.33289900 | 2.30204600  | -1.84428200 |
| C | 6.23598300 | -0.25033700 | -3.05356800 |
| C | 6.11149700 | -1.67591000 | -2.93639200 |
| C | 5.78899300 | -3.97050600 | -1.32293100 |
| C | 5.63179500 | -4.56590000 | -0.02589400 |
| C | 5.41911600 | -4.30892000 | 2.77900400  |
| C | 6.29662400 | 3.12777100  | -0.66957300 |
| C | 6.08167100 | 3.39420200  | 2.13419200  |
| C | 5.92619900 | 2.79459500  | 3.42963700  |
| C | 5.61216700 | 0.49296600  | 5.03630900  |
| C | 5.49035900 | -0.93237900 | 5.15606500  |
| C | 5.38765800 | -3.48607700 | 3.95497100  |
| C | 7.55483200 | 1.65639300  | -2.20064800 |
| C | 7.50521000 | 0.35769300  | -2.81355200 |
| C | 7.26266000 | -2.44269400 | -2.58375100 |
| C | 7.09862300 | -3.61163700 | -1.76501900 |
| C | 6.78957300 | -4.78334500 | 0.78124400  |
| C | 6.68152100 | -4.65163200 | 2.20753500  |
| C | 7.48560100 | 3.28252900  | 0.10523900  |
| C | 7.37605900 | 3.41682900  | 1.53207300  |
| C | 7.07113500 | 2.23824600  | 4.07628900  |
| C | 6.91140400 | 1.06713100  | 4.89277600  |
| C | 6.67180600 | -1.73315000 | 5.12629800  |
| C | 6.61945900 | -3.03224000 | 4.51577200  |
| C | 8.78733000 | 2.10187500  | -1.62306000 |
| C | 8.68912700 | -0.44754900 | -2.82088900 |
| C | 8.56660200 | -1.86220500 | -2.70552600 |
| C | 8.24626900 | -4.15686600 | -1.10383900 |
| C | 8.09009200 | -4.74977700 | 0.18202100  |
| C | 7.87733800 | -4.48980900 | 2.97922700  |
| C | 8.75252700 | 2.92396600  | -0.45968300 |
| C | 8.53754200 | 3.18530300  | 2.33766200  |
| C | 8.38353700 | 2.58994400  | 3.62289500  |
| C | 8.07009100 | 0.29256600  | 5.22320400  |

|   |             |             |             |
|---|-------------|-------------|-------------|
| C | 7.94913600  | -1.12196100 | 5.34066300  |
| C | 7.84626000  | -3.67079400 | 4.14436700  |
| C | 10.02323500 | 1.46121700  | -1.98409500 |
| C | 9.97297000  | 0.15931200  | -2.59449600 |
| C | 9.73175600  | -2.63319500 | -2.36605200 |
| C | 9.56806900  | -3.80634700 | -1.54962700 |
| C | 9.25973300  | -4.97883500 | 0.98691300  |
| C | 9.15123300  | -4.84531000 | 2.41516800  |
| C | 9.95540200  | 3.08376200  | 0.31218900  |
| C | 9.84556200  | 3.21736300  | 1.74061800  |
| C | 9.54136400  | 2.04180500  | 4.27648600  |
| C | 9.38137100  | 0.86810800  | 5.09295700  |
| C | 9.14226600  | -1.92445000 | 5.32393900  |
| C | 9.08963100  | -3.22619000 | 4.71370900  |
| C | 11.25928900 | 1.94885900  | -1.46026400 |
| C | 11.15903100 | -0.63302500 | -2.66859500 |
| C | 11.03428900 | -2.07670600 | -2.55090200 |
| C | 10.71053100 | -4.40276700 | -0.93396600 |
| C | 10.55090900 | -5.01013400 | 0.37702100  |
| C | 10.33547300 | -4.74529000 | 3.20762600  |
| C | 11.22412400 | 2.78847000  | -0.27401400 |
| C | 11.00637200 | 3.05298600  | 2.55653600  |
| C | 10.84920000 | 2.44458600  | 3.86743100  |
| C | 10.53197500 | 0.11781900  | 5.48478300  |
| C | 10.40852900 | -1.32577000 | 5.60369600  |
| C | 10.30408500 | -3.90689600 | 4.39478800  |
| C | 12.45378000 | 1.29843800  | -1.90385300 |
| C | 12.40517500 | 0.04636900  | -2.48939900 |
| C | 12.14895900 | -2.92023800 | -2.24683700 |
| C | 11.99183400 | -4.04884700 | -1.46306000 |
| C | 11.66392200 | -5.29891900 | 1.22824000  |
| C | 11.55950700 | -5.17027400 | 2.60125000  |
| C | 12.38199300 | 3.02427000  | 0.53255000  |
| C | 12.27642000 | 3.15269300  | 1.90547900  |
| C | 11.95346000 | 1.90149000  | 4.59712700  |
| C | 11.79962500 | 0.77277900  | 5.38136000  |



|   |             |             |             |
|---|-------------|-------------|-------------|
| C | 11.54588300 | -2.19332000 | 5.62479900  |
| C | 11.49518700 | -3.44502900 | 5.03872600  |
| H | 13.42569500 | 1.72412500  | -1.65739800 |
| H | 13.34021800 | -0.47655800 | -2.68648700 |
| H | 13.15643200 | -2.60390300 | -2.51437100 |
| H | 12.88027100 | -4.58783200 | -1.13633600 |
| H | 12.64424900 | -5.48779100 | 0.79247600  |
| H | 12.46054900 | -5.26189200 | 3.20650700  |
| H | 13.37398200 | 2.96506600  | 0.08638600  |
| H | 13.18830500 | 3.19066700  | 2.50014300  |
| H | 12.95704300 | 2.29065200  | 4.42988100  |
| H | 12.68645600 | 0.30645600  | 5.80874600  |
| H | 12.50517200 | -1.81983800 | 5.98100500  |
| H | 12.41606700 | -4.02022000 | 4.95090900  |

**(7,7)@Cycle-9**

|   |             |             |             |
|---|-------------|-------------|-------------|
| C | 2.69159000  | 1.09638500  | -7.36850400 |
| C | 0.33829700  | 1.65234900  | -7.50573200 |
| C | 2.36858100  | -0.26340800 | -7.23561400 |
| H | 3.73859700  | 1.40598200  | -7.35428000 |
| C | 0.01476700  | 0.30202500  | -7.36250900 |
| H | -0.44821800 | 2.40210600  | -7.58816500 |
| H | 3.15203400  | -1.00611200 | -7.09950100 |
| H | -1.03262300 | -0.00337700 | -7.32996100 |
| C | 1.82693600  | -7.55040700 | -2.37238200 |
| C | -0.12701300 | -8.52682800 | -3.60330500 |
| C | 0.80956600  | -7.52919300 | -3.44881200 |
| C | 0.97473100  | -6.40188200 | -4.39062400 |
| C | -0.10359500 | -5.72088800 | -4.97883800 |
| C | 2.47475400  | -4.78633300 | -5.45164800 |
| C | 0.07847500  | -4.61502600 | -5.81819200 |
| H | -1.12346100 | -6.01177200 | -4.73390300 |
| H | 3.45830800  | -4.33617200 | -5.56716900 |
| H | -0.79623900 | -4.12369800 | -6.23539800 |
| C | 1.02553700  | -0.67062700 | -7.24151900 |
| C | 1.37432200  | -4.10969300 | -6.00888100 |

|   |             |              |             |
|---|-------------|--------------|-------------|
| C | 0.58828500  | -2.11282700  | -7.10073900 |
| H | 0.21273100  | -2.50949000  | -8.06286100 |
| H | -0.24509500 | -2.14233500  | -6.38204600 |
| O | 1.67279100  | -2.92889600  | -6.64453400 |
| C | 2.30199300  | -5.94136100  | -4.67423400 |
| C | 3.43380700  | -6.69327200  | -4.08286900 |
| C | 4.58673800  | -6.96893300  | -4.78602200 |
| S | 4.89716400  | -6.42533100  | -6.47326200 |
| S | 5.90252500  | -8.03555700  | -4.17956800 |
| C | 6.29668600  | -7.45571900  | -6.75083400 |
| H | 6.73930200  | -7.43813000  | -7.74478600 |
| C | 6.75219100  | -8.18350700  | -5.71326800 |
| H | 7.61824300  | -8.84171000  | -5.74200100 |
| S | -1.26933200 | -8.63209800  | -4.98960400 |
| C | -1.33906400 | -10.88273700 | -3.56273800 |
| H | -1.60172000 | -11.88892400 | -3.24209700 |
| S | -0.25759300 | -9.96193400  | -2.52302100 |
| C | -1.79629700 | -10.28261100 | -4.67821400 |
| H | -2.48358300 | -10.73013900 | -5.39337300 |
| C | 2.50447900  | -7.91308000  | -0.05065900 |
| C | 3.16444200  | -7.19385100  | -2.71682900 |
| C | 4.14709700  | -7.25780700  | -1.70615400 |
| H | 5.16096300  | -6.92508000  | -1.91783200 |
| C | 3.83949200  | -7.63934000  | -0.40312300 |
| H | 4.59995400  | -7.64009100  | 0.37527900  |
| C | 1.50572700  | -7.87337700  | -1.03850500 |
| H | 0.46628200  | -8.03919800  | -0.76810500 |
| O | 2.28403700  | -8.14950100  | 1.27670900  |
| C | 0.23049300  | 7.85829500   | 0.61003400  |
| C | -0.03654800 | 7.71298100   | -2.20603900 |
| C | 1.36589100  | 7.72026100   | -0.20882200 |
| H | 2.32091400  | 7.57463400   | 0.28899000  |
| C | -1.04711400 | 7.91142500   | 0.02389500  |
| H | -1.94590100 | 7.97603000   | 0.63152000  |
| C | -1.16040400 | 7.81275400   | -1.36739500 |
| H | -2.15743600 | 7.76215300   | -1.80260100 |

|   |             |             |             |
|---|-------------|-------------|-------------|
| C | 1.26309200  | 7.66474800  | -1.60728100 |
| C | 2.43941400  | 7.49115400  | -2.49375200 |
| C | -0.13670500 | 7.60744200  | -3.67629100 |
| C | 0.86205500  | 6.69642200  | -4.27440500 |
| C | 2.17233400  | 6.66329700  | -3.69301600 |
| C | 0.57450100  | 5.87781000  | -5.37519000 |
| H | -0.43337700 | 5.82694800  | -5.78218100 |
| C | 3.12202800  | 5.81080400  | -4.28148100 |
| H | 4.09744000  | 5.69165200  | -3.81794500 |
| C | 2.84563000  | 5.02654600  | -5.40942400 |
| H | 3.62082600  | 4.36228600  | -5.78345100 |
| C | 1.56311300  | 5.07419400  | -5.97648400 |
| O | 1.14904800  | 4.42296100  | -7.11117500 |
| C | 1.68449600  | 2.06241400  | -7.52218100 |
| C | 2.02123400  | 3.51201500  | -7.80837300 |
| C | -0.98931100 | 8.38598200  | -4.42800600 |
| C | 3.65076200  | 8.11141800  | -2.25632600 |
| S | -1.04983700 | 8.38474500  | -6.22657200 |
| S | -2.07223000 | 9.64137100  | -3.72688100 |
| S | 3.97484300  | 9.20718600  | -0.86634500 |
| S | 5.06150500  | 8.02933300  | -3.36930000 |
| C | -2.46612700 | 10.42451800 | -5.25351200 |
| H | -3.08435000 | 11.31902000 | -5.21039200 |
| C | -2.00316200 | 9.85678200  | -6.38354000 |
| H | -2.19087100 | 10.22389800 | -7.39062100 |
| C | 6.00264800  | 9.29489900  | -2.59210100 |
| H | 6.94882100  | 9.56825000  | -3.05473500 |
| C | 5.50931000  | 9.82809700  | -1.45822200 |
| H | 5.99648100  | 10.59892900 | -0.86440200 |
| H | 1.83696300  | 3.72758400  | -8.87295300 |
| H | 3.08269500  | 3.72076200  | -7.61460700 |
| O | 0.47323500  | 7.85946400  | 1.95739900  |
| C | -0.66231400 | 7.69046600  | 2.82943700  |
| H | -1.30513200 | 6.89149400  | 2.42879900  |
| H | -1.25516600 | 8.62247000  | 2.85693200  |
| C | -0.17351800 | 7.28418900  | 4.21900000  |

|   |             |             |            |
|---|-------------|-------------|------------|
| H | 0.34235700  | 8.12228500  | 4.71202400 |
| H | 0.56330400  | 6.47937100  | 4.08941700 |
| C | -1.35342000 | 6.76358000  | 5.06755300 |
| H | -1.94376200 | 7.60478400  | 5.46766600 |
| H | -2.03207600 | 6.20025500  | 4.40559900 |
| C | -0.93881200 | 5.81123800  | 6.20471800 |
| H | -0.41437000 | 6.35951400  | 7.00537000 |
| H | -0.21826200 | 5.08286000  | 5.80011000 |
| C | -2.14902000 | 5.04330600  | 6.76859300 |
| H | -2.78787000 | 5.71951800  | 7.36227700 |
| H | -2.76578900 | 4.70919100  | 5.91880800 |
| C | -1.78255100 | 3.80337300  | 7.60085900 |
| H | -1.31182600 | 4.10343400  | 8.55309000 |
| H | -1.02889500 | 3.21459200  | 7.05324600 |
| C | -3.00392600 | 2.91131100  | 7.87494000 |
| H | -3.76533600 | 3.48393900  | 8.43348800 |
| H | -3.46860700 | 2.64112600  | 6.91381300 |
| C | 0.93126600  | -8.12019500 | 1.77726200 |
| H | 0.36867300  | -7.31402000 | 1.28039000 |
| H | 0.42827300  | -9.07877700 | 1.55725600 |
| C | 1.01320300  | -7.82914000 | 3.27417200 |
| H | 1.51209400  | -8.66030700 | 3.79604300 |
| H | 1.65560400  | -6.94390100 | 3.39030000 |
| C | -0.36643100 | -7.53125400 | 3.89325400 |
| H | -0.92632000 | -8.46523200 | 4.06766800 |
| H | -0.96087900 | -6.94028600 | 3.17790400 |
| C | -0.25129400 | -6.72076300 | 5.19618500 |
| H | 0.24627500  | -7.32149700 | 5.97682600 |
| H | 0.40761100  | -5.85826000 | 5.00381900 |
| C | -1.60100500 | -6.19257500 | 5.70951800 |
| H | -2.23265100 | -7.02766700 | 6.05840800 |
| H | -2.13931500 | -5.72868100 | 4.86816500 |
| C | -1.43813200 | -5.14937700 | 6.82720800 |
| H | -0.98842900 | -5.62142200 | 7.71823800 |
| H | -0.71994500 | -4.38434600 | 6.48977000 |
| C | -2.74882900 | -4.44917400 | 7.21831400 |

|   |             |             |             |
|---|-------------|-------------|-------------|
| H | -3.46316100 | -5.18539700 | 7.62681500  |
| H | -3.21934200 | -4.03041100 | 6.31605900  |
| C | -2.52635000 | -3.32823500 | 8.24473100  |
| H | -1.75321600 | -2.63521000 | 7.87372200  |
| H | -2.12913000 | -3.76589600 | 9.17727300  |
| C | -2.66498700 | 1.63262900  | 8.65419000  |
| H | -1.85441000 | 1.08650400  | 8.14454900  |
| H | -2.27683200 | 1.90895300  | 9.65004900  |
| C | -3.88320300 | 0.69066200  | 8.81911800  |
| H | -4.11476200 | 0.21836100  | 7.85339800  |
| H | -4.76071500 | 1.30881600  | 9.08624300  |
| C | -3.66166700 | -0.33376000 | 9.90215200  |
| H | -3.48145900 | 0.09550300  | 10.89443900 |
| C | -3.63583600 | -1.67399700 | 9.79592900  |
| H | -3.43420600 | -2.24663800 | 10.70844300 |
| C | -3.80783200 | -2.52109300 | 8.56108900  |
| H | -4.63607200 | -3.23541000 | 8.72452600  |
| H | -4.08268000 | -1.91418400 | 7.68618800  |
| H | 11.55247300 | 5.29748500  | 1.93330300  |
| H | 11.34240400 | 4.61945500  | 4.25401400  |
| H | 11.22146200 | 3.21054300  | 5.82450300  |
| H | 11.18095800 | 0.96774200  | 6.75153100  |
| H | 11.23883300 | -1.14342500 | 6.62377300  |
| H | 11.39434400 | -3.25819100 | 5.44259000  |
| H | 11.58083900 | -4.46937600 | 3.71944000  |
| H | 11.81344300 | -4.86183500 | 1.33597000  |
| H | 11.76118000 | 4.95037800  | -0.14061900 |
| H | 11.98093700 | 3.55998800  | -2.11741300 |
| H | 12.11718700 | 1.71686400  | -3.14402400 |
| H | 12.17738700 | -0.70492800 | -3.28952800 |
| H | 12.13588800 | -2.66263000 | -2.49230900 |
| H | 11.99381600 | -4.27841300 | -0.68675200 |
| C | 10.56165000 | 5.06538500  | 2.32134000  |
| C | 10.44202000 | 4.67890200  | 3.64419900  |
| C | 10.27057500 | 2.68148500  | 5.86924800  |
| C | 10.24756100 | 1.40333300  | 6.39778800  |

|   |             |             |             |
|---|-------------|-------------|-------------|
| C | 10.32797200 | -1.58529900 | 6.22228600  |
| C | 10.41659000 | -2.79043700 | 5.54895200  |
| C | 10.68153000 | -4.50395300 | 3.10611900  |
| C | 10.81403700 | -4.72748800 | 1.74736500  |
| C | 10.85672900 | 4.57740500  | -0.61920900 |
| C | 10.98205600 | 3.78487400  | -1.74612200 |
| C | 11.17475100 | 1.17400900  | -3.20152500 |
| C | 11.20908300 | -0.20641900 | -3.28470200 |
| C | 11.15108100 | -2.97611200 | -2.14869700 |
| C | 11.07010500 | -3.89661800 | -1.11932000 |
| C | 9.44434400  | 5.01445200  | 1.43229000  |
| C | 9.19683100  | 4.21409600  | 4.16852600  |
| C | 9.11368900  | 3.24538800  | 5.24852900  |
| C | 9.06574200  | 0.60226800  | 6.34218800  |
| C | 9.10455800  | -0.84794300 | 6.25888300  |
| C | 9.28792300  | -3.34042200 | 4.86688900  |
| C | 9.41661900  | -4.16990800 | 3.68055500  |
| C | 9.69115200  | -4.63121400 | 0.86900000  |
| C | 9.58744400  | 4.77907300  | 0.00528700  |
| C | 9.84659000  | 3.13991900  | -2.32615800 |
| C | 9.94026000  | 1.87350700  | -3.03317400 |
| C | 10.01128300 | -0.98152400 | -3.20496200 |
| C | 9.98282000  | -2.32501500 | -2.65159500 |
| C | 9.81525800  | -4.22808600 | -0.52179000 |
| C | 8.14915500  | 4.88616100  | 2.02225800  |
| C | 8.02478500  | 4.48309400  | 3.39672000  |
| C | 7.86309000  | 2.60029700  | 5.49655200  |
| C | 7.83894800  | 1.27277100  | 6.04726100  |
| C | 7.91380400  | -1.54514300 | 5.88807800  |
| C | 8.00593100  | -2.79755800 | 5.18879200  |
| C | 8.25629300  | -4.40760200 | 2.88144500  |
| C | 8.39423500  | -4.63756100 | 1.46878200  |
| C | 8.42713000  | 4.43058600  | -0.75229500 |
| C | 8.55745800  | 3.60737300  | -1.92426200 |
| C | 8.73944500  | 1.14617000  | -3.29968500 |
| C | 8.77495200  | -0.28860200 | -3.38653800 |

|   |            |             |             |
|---|------------|-------------|-------------|
| C | 8.71983500 | -2.89773000 | -2.30754400 |
| C | 8.63577100 | -3.85236000 | -1.23568100 |
| C | 6.97676300 | 4.89355600  | 1.19061300  |
| C | 6.73204700 | 4.09832900  | 3.89495200  |
| C | 6.65047800 | 3.14963100  | 4.95405100  |
| C | 6.60272600 | 0.53909300  | 6.03945200  |
| C | 6.64026500 | -0.88214100 | 5.96068600  |
| C | 6.82134000 | -3.34527600 | 4.58636000  |
| C | 6.94811600 | -4.15520800 | 3.42200700  |
| C | 7.21974800 | -4.60255900 | 0.64105400  |
| C | 7.11718900 | 4.66485500  | -0.20840000 |
| C | 7.37342900 | 3.04559600  | -2.51526600 |
| C | 7.46520100 | 1.80545100  | -3.21058600 |
| C | 7.53506800 | -1.01680800 | -3.37987900 |
| C | 7.50708400 | -2.33199200 | -2.83354800 |
| C | 7.34125100 | -4.20717000 | -0.72186900 |
| C | 5.67576900 | 4.83505000  | 1.78585800  |
| C | 5.55112800 | 4.43006000  | 3.15688800  |
| C | 5.38918500 | 2.54557800  | 5.26162000  |
| C | 5.36471800 | 1.22182600  | 5.81416200  |
| C | 5.43900700 | -1.60029900 | 5.65876000  |
| C | 5.53087700 | -2.85028300 | 4.96102400  |
| C | 5.78255600 | -4.45669500 | 2.64845500  |
| C | 5.92064600 | -4.67699200 | 1.23774800  |
| C | 5.95458900 | 4.38088900  | -0.99350200 |
| C | 6.08448200 | 3.55873200  | -2.16282800 |
| C | 6.26720400 | 1.09720800  | -3.54844100 |
| C | 6.30170600 | -0.33512100 | -3.63352400 |
| C | 6.24597200 | -2.94413500 | -2.54430500 |
| C | 6.16207500 | -3.89032400 | -1.46935600 |
| C | 4.51523600 | 4.85664400  | 0.95557700  |
| C | 4.26898400 | 4.05747900  | 3.66418200  |
| C | 4.18644800 | 3.10373100  | 4.73217100  |
| C | 4.13826400 | 0.49042700  | 5.82668400  |
| C | 4.17568700 | -0.94079700 | 5.74847100  |
| C | 4.35685900 | -3.40743600 | 4.36932900  |

|   |            |             |             |
|---|------------|-------------|-------------|
| C | 4.48541900 | -4.22019300 | 3.19555000  |
| C | 4.75931200 | -4.65032900 | 0.41162400  |
| C | 4.65743000 | 4.62519900  | -0.45180200 |
| C | 4.91355700 | 3.00326400  | -2.76063900 |
| C | 5.00606000 | 1.76145800  | -3.47158900 |
| C | 5.07333600 | -1.06425000 | -3.63407300 |
| C | 5.04500600 | -2.38623000 | -3.07846600 |
| C | 4.88138400 | -4.25339300 | -0.95806600 |
| C | 3.21258100 | 4.77520900  | 1.54922100  |
| C | 3.08818800 | 4.37408700  | 2.91525400  |
| C | 2.92481600 | 2.49021900  | 5.03273100  |
| C | 2.89966600 | 1.17313700  | 5.58866700  |
| C | 2.97358600 | -1.65755300 | 5.43324300  |
| C | 3.06519700 | -2.90127800 | 4.73452500  |
| C | 3.32028500 | -4.50812300 | 2.41136700  |
| C | 3.45949000 | -4.72496700 | 1.00776500  |
| C | 3.49464400 | 4.32075200  | -1.23065800 |
| C | 3.62323900 | 3.49879100  | -2.38796900 |
| C | 3.80371700 | 1.04979300  | -3.79340500 |
| C | 3.83677600 | -0.37658900 | -3.86979200 |
| C | 3.78155300 | -2.98825100 | -2.76661800 |
| C | 3.70072500 | -3.93671200 | -1.70321800 |
| C | 2.05132300 | 4.78739800  | 0.71297800  |
| C | 1.80315300 | 3.99218100  | 3.41935100  |
| C | 1.71893200 | 3.04554000  | 4.49385500  |
| C | 1.66901100 | 0.43802200  | 5.60322800  |
| C | 1.70613700 | -0.99452900 | 5.52437700  |
| C | 1.88811500 | -3.45629900 | 4.13344400  |
| C | 2.01810100 | -4.26714300 | 2.95749800  |
| C | 2.29782200 | -4.72062900 | 0.17358500  |
| C | 2.19387800 | 4.56877100  | -0.69402200 |
| C | 2.44896200 | 2.95868300  | -3.00056100 |
| C | 2.53984600 | 1.71972900  | -3.71014300 |
| C | 2.60339600 | -1.10367800 | -3.84782200 |
| C | 2.57546000 | -2.42120800 | -3.28841200 |
| C | 2.41978800 | -4.32308800 | -1.19695300 |



|   |             |             |             |
|---|-------------|-------------|-------------|
| C | 0.75494800  | 4.70740300  | 1.30016300  |
| C | 0.62986400  | 4.29758700  | 2.66444800  |
| C | 0.46267800  | 2.43265500  | 4.78929200  |
| C | 0.43555400  | 1.11769300  | 5.35996300  |
| C | 0.50890500  | -1.70750600 | 5.20454000  |
| C | 0.60182600  | -2.94848200 | 4.49190400  |
| C | 0.86008900  | -4.55576800 | 2.17322200  |
| C | 1.00228900  | -4.79375100 | 0.76759700  |
| C | 1.03830200  | 4.29324800  | -1.48348900 |
| C | 1.16747300  | 3.48044800  | -2.65436700 |
| C | 1.34105600  | 1.01297700  | -4.02273000 |
| C | 1.37418700  | -0.41662200 | -4.07995700 |
| C | 1.32102400  | -3.02471000 | -2.97824700 |
| C | 1.24259300  | -3.99994900 | -1.93523500 |
| C | -0.40472800 | 4.73921500  | 0.46318600  |
| C | -0.65489700 | 3.91784800  | 3.16517600  |
| C | -0.74002200 | 2.97728600  | 4.23421100  |
| C | -0.79527200 | 0.38333600  | 5.36527500  |
| C | -0.75834700 | -1.04346500 | 5.28734000  |
| C | -0.57271800 | -3.49184800 | 3.87692800  |
| C | -0.44243100 | -4.30595800 | 2.71203400  |
| C | -0.16266600 | -4.78602800 | -0.06596500 |
| C | -0.26339500 | 4.53944800  | -0.94307600 |
| C | -0.00871400 | 2.93692400  | -3.26293600 |
| C | 0.07923700  | 1.68470300  | -3.94513100 |
| C | 0.14274800  | -1.14120300 | -4.04483000 |
| C | 0.11643200  | -2.45575800 | -3.49468000 |
| C | -0.04089600 | -4.38225600 | -1.43015700 |
| C | -1.70595400 | 4.66386500  | 1.05479700  |
| C | -1.83147200 | 4.24572000  | 2.41942200  |
| C | -2.00125200 | 2.37427300  | 4.53745400  |
| C | -2.03077900 | 1.06406600  | 5.11340000  |
| C | -1.95811500 | -1.75633500 | 4.96032200  |
| C | -1.86294000 | -2.99070600 | 4.24069100  |
| C | -1.60549000 | -4.61435100 | 1.93415100  |
| C | -1.46443400 | -4.86186800 | 0.52875200  |

|   |             |             |             |
|---|-------------|-------------|-------------|
| C | -1.42667100 | 4.26652200  | -1.73324700 |
| C | -1.29825800 | 3.45459500  | -2.90892900 |
| C | -1.12293600 | 0.97018100  | -4.25305900 |
| C | -1.08965500 | -0.46109300 | -4.30488400 |
| C | -1.14192900 | -3.07433000 | -3.21202700 |
| C | -1.22185500 | -4.05233400 | -2.16975600 |
| C | -2.86693800 | 4.71082500  | 0.22630400  |
| C | -3.11433600 | 3.88378400  | 2.92902700  |
| C | -3.19958800 | 2.93220100  | 3.99844500  |
| C | -3.25869200 | 0.33540400  | 5.12299600  |
| C | -3.22205400 | -1.09649700 | 5.04659700  |
| C | -3.03413300 | -3.54535900 | 3.64087100  |
| C | -2.90446600 | -4.37134800 | 2.47612200  |
| C | -2.62735100 | -4.84711100 | -0.30244000 |
| C | -2.72563500 | 4.50858300  | -1.18803900 |
| C | -2.47285000 | 2.89818500  | -3.50435500 |
| C | -2.38335000 | 1.63731500  | -4.18638300 |
| C | -2.31358200 | -1.19582600 | -4.30894300 |
| C | -2.33952600 | -2.52108200 | -3.75548700 |
| C | -2.50372400 | -4.43666400 | -1.67197100 |
| C | -4.16705400 | 4.63408600  | 0.82424500  |
| C | -4.29185400 | 4.21808600  | 2.18694800  |
| C | -4.46194100 | 2.33115200  | 4.30332300  |
| C | -4.49156400 | 1.01852800  | 4.86800300  |
| C | -4.41987300 | -1.80877300 | 4.71569600  |
| C | -4.32524200 | -3.04763900 | 4.00957000  |
| C | -4.06843300 | -4.67232800 | 1.69708700  |
| C | -3.92847500 | -4.90875900 | 0.29414000  |
| C | -3.89112900 | 4.21650000  | -1.96885700 |
| C | -3.76343300 | 3.40177800  | -3.13737000 |
| C | -3.58355100 | 0.91543400  | -4.49123700 |
| C | -3.54832900 | -0.51323700 | -4.55680100 |
| C | -3.59993900 | -3.13749100 | -3.46733800 |
| C | -3.68284700 | -4.10127200 | -2.41393100 |
| C | -5.33492000 | 4.66702500  | -0.00700900 |
| C | -5.57974600 | 3.84853000  | 2.69766600  |

|   |             |             |             |
|---|-------------|-------------|-------------|
| C | -5.66551100 | 2.89521400  | 3.76568400  |
| C | -5.72437700 | 0.28713200  | 4.87413900  |
| C | -5.68820300 | -1.14436200 | 4.79794800  |
| C | -5.50195300 | -3.60851500 | 3.41210600  |
| C | -5.37203800 | -4.42805200 | 2.24271900  |
| C | -5.09521300 | -4.88584800 | -0.53989500 |
| C | -5.19518200 | 4.45322500  | -1.41829400 |
| C | -4.94236000 | 2.83733100  | -3.72936300 |
| C | -4.85150100 | 1.58093500  | -4.41503000 |
| C | -4.77939800 | -1.24945700 | -4.55273300 |
| C | -4.80542400 | -2.57443400 | -4.00331000 |
| C | -4.97104000 | -4.47759100 | -1.90882500 |
| C | -6.63100400 | 4.58806700  | 0.58789000  |
| C | -6.75514600 | 4.17476700  | 1.95647500  |
| C | -6.92375100 | 2.28996800  | 4.06217900  |
| C | -6.95313600 | 0.96853700  | 4.62101700  |
| C | -6.88249000 | -1.85441900 | 4.47064100  |
| C | -6.78849600 | -3.10405300 | 3.77157400  |
| C | -6.53233800 | -4.71932800 | 1.46313800  |
| C | -6.39202000 | -4.94860200 | 0.05379600  |
| C | -6.35694700 | 4.15731000  | -2.19371400 |
| C | -6.22874400 | 3.33791600  | -3.36439800 |
| C | -6.04805100 | 0.86366100  | -4.72003800 |
| C | -6.01165300 | -0.56907100 | -4.79123000 |
| C | -6.06309500 | -3.18272200 | -3.70834400 |
| C | -6.14688800 | -4.14464900 | -2.64692100 |
| C | -7.79694300 | 4.60347000  | -0.24228900 |
| C | -8.04081800 | 3.79290900  | 2.45749000  |
| C | -8.12558300 | 2.84378500  | 3.51622000  |
| C | -8.18254300 | 0.23575700  | 4.60942900  |
| C | -8.14693400 | -1.18598200 | 4.53414900  |
| C | -7.96326200 | -3.65169800 | 3.16352400  |
| C | -7.83423600 | -4.46469200 | 2.00130200  |
| C | -7.55726200 | -4.91366300 | -0.77702800 |
| C | -7.65873300 | 4.38487500  | -1.64266300 |
| C | -7.40612500 | 2.76917000  | -3.94736700 |

|   |              |             |             |
|---|--------------|-------------|-------------|
| C | -7.31519100  | 1.52343900  | -4.63113400 |
| C | -7.24290500  | -1.29958500 | -4.77634000 |
| C | -7.26884800  | -2.61510100 | -4.23131700 |
| C | -7.43386000  | -4.50869800 | -2.13673900 |
| C | -9.10515200  | 4.54268200  | 0.35101900  |
| C | -9.22921300  | 4.13144000  | 1.72290900  |
| C | -9.39668800  | 2.24503200  | 3.82038200  |
| C | -9.42544500  | 0.91872500  | 4.37421800  |
| C | -9.35525200  | -1.90008600 | 4.22417200  |
| C | -9.26200000  | -3.15470200 | 3.52882200  |
| C | -9.00610400  | -4.76855100 | 1.22566200  |
| C | -8.86530300  | -4.99577700 | -0.18676000 |
| C | -8.83144400  | 4.10324400  | -2.42509100 |
| C | -8.70297100  | 3.28092800  | -3.59695700 |
| C | -8.52209700  | 0.81282000  | -4.95532200 |
| C | -8.48530500  | -0.62225900 | -5.03020800 |
| C | -8.53662800  | -3.23174100 | -3.94942200 |
| C | -8.62057300  | -4.19349500 | -2.88426400 |
| C | -10.26847500 | 4.62787000  | -0.47431900 |
| C | -10.51533200 | 3.81166600  | 2.25743400  |
| C | -10.60151100 | 2.84030700  | 3.33500800  |
| C | -10.65805700 | 0.19861800  | 4.43359300  |
| C | -10.62184500 | -1.25215000 | 4.35659700  |
| C | -10.43695300 | -3.74983700 | 2.97495300  |
| C | -10.30527100 | -4.58076000 | 1.79002700  |
| C | -10.02460500 | -5.03311900 | -1.02123100 |
| C | -10.12777900 | 4.39997500  | -1.90265000 |
| C | -9.87211000  | 2.76226700  | -4.23381700 |
| C | -9.77887500  | 1.49221900  | -4.93391700 |
| C | -9.70547300  | -1.36382100 | -5.08602700 |
| C | -9.73189700  | -2.70624900 | -4.52993800 |
| C | -9.89872000  | -4.62038300 | -2.40898700 |
| C | -11.53565900 | 4.62762600  | 0.18552000  |
| C | -11.65500100 | 4.23324900  | 1.50612400  |
| C | -11.83223300 | 2.22784800  | 3.72444100  |
| C | -11.85971800 | 0.95056100  | 4.25507100  |

|   |              |             |             |
|---|--------------|-------------|-------------|
| C | -11.78516300 | -2.03957200 | 4.09578100  |
| C | -11.69566800 | -3.24771600 | 3.42795800  |
| C | -11.42436800 | -4.96154300 | 0.98748400  |
| C | -11.28865700 | -5.17994800 | -0.37180100 |
| C | -11.24566900 | 4.15212400  | -2.75734600 |
| C | -11.12207300 | 3.35989200  | -3.88463400 |
| C | -10.92958200 | 0.74367900  | -5.33002800 |
| C | -10.89398800 | -0.63728500 | -5.40389800 |
| C | -10.94836500 | -3.40463900 | -4.25831400 |
| C | -11.02911400 | -4.32979000 | -3.23290700 |
| H | -12.44261200 | 4.82589400  | -0.38390300 |
| H | -12.65196300 | 4.13448200  | 1.93320300  |
| H | -12.77740200 | 2.71757100  | 3.49446900  |
| H | -12.82539500 | 0.47638200  | 4.42465900  |
| H | -12.77270300 | -1.63603100 | 4.31488800  |
| H | -12.61577700 | -3.75596400 | 3.14303600  |
| H | -12.42408400 | -4.96599600 | 1.41948800  |
| H | -12.18599000 | -5.34937900 | -0.96528100 |
| H | -12.23877700 | 4.48685000  | -2.46100900 |
| H | -12.02189300 | 3.09656600  | -4.43883700 |
| H | -11.88532400 | 1.24899800  | -5.46185500 |
| H | -11.82288100 | -1.17379500 | -5.59207200 |
| H | -11.86138000 | -3.12595100 | -4.78257600 |
| H | -12.00296700 | -4.74888500 | -2.98373200 |

**(8,8)@Cycle-9**

|   |             |             |             |
|---|-------------|-------------|-------------|
| C | 2.41694900  | 0.51339800  | -7.75856400 |
| C | 0.06866700  | 1.05603500  | -7.85690400 |
| C | 2.12046700  | -0.85751100 | -7.77420400 |
| H | 3.45893300  | 0.82628400  | -7.67086600 |
| C | -0.22965600 | -0.31574900 | -7.86470800 |
| H | -0.73775200 | 1.78757900  | -7.83788300 |
| H | 2.92192000  | -1.59038500 | -7.69839900 |
| H | -1.27567400 | -0.62794100 | -7.86519000 |
| C | 1.34470000  | -7.96244900 | -2.47062100 |
| C | -0.78545700 | -8.75563200 | -3.52791200 |

|   |             |              |             |
|---|-------------|--------------|-------------|
| C | 0.27432900  | -7.86803200  | -3.49827600 |
| C | 0.50966400  | -6.84695300  | -4.55180700 |
| C | -0.52066600 | -6.15619100  | -5.21492900 |
| C | 2.09319800  | -5.43012000  | -5.78480400 |
| C | -0.28130100 | -5.14464000  | -6.15613300 |
| H | -1.55715300 | -6.33894100  | -4.94085600 |
| H | 3.10466100  | -5.06003500  | -5.93810900 |
| H | -1.13659200 | -4.64739800  | -6.60577700 |
| C | 0.78303600  | -1.29145600  | -7.78111900 |
| C | 1.03538300  | -4.71322600  | -6.38482400 |
| C | 0.35241800  | -2.74896600  | -7.64717000 |
| H | 0.04990100  | -3.16976400  | -8.62361900 |
| H | -0.52964300 | -2.75574100  | -6.98993500 |
| O | 1.39318200  | -3.58006700  | -7.09083000 |
| C | 1.85770600  | -6.50808400  | -4.90800900 |
| C | 2.94084800  | -7.32143800  | -4.30494400 |
| C | 4.03174200  | -7.74203100  | -5.04019100 |
| S | 4.32449300  | -7.29649400  | -6.75931800 |
| S | 5.25309400  | -8.92426300  | -4.44857700 |
| C | 5.58232500  | -8.49059600  | -7.05669700 |
| H | 5.97453000  | -8.55946000  | -8.06942800 |
| C | 6.00326900  | -9.22691700  | -6.01078500 |
| H | 6.78775400  | -9.98009600  | -6.04914200 |
| S | -2.00881200 | -8.83343900  | -4.84510800 |
| C | -2.26672000 | -10.93975700 | -3.23733500 |
| H | -2.62847700 | -11.87722900 | -2.81962300 |
| S | -1.02713600 | -10.08134100 | -2.33245300 |
| C | -2.71159600 | -10.37570600 | -4.37610500 |
| H | -3.48757800 | -10.78594700 | -5.01922200 |
| C | 2.14020000  | -8.40465300  | -0.18318400 |
| C | 2.68817500  | -7.75104400  | -2.90824400 |
| C | 3.72165900  | -7.90518800  | -1.95775500 |
| H | 4.74629800  | -7.66625200  | -2.23415100 |
| C | 3.46757400  | -8.25964900  | -0.63636800 |
| H | 4.27784400  | -8.33535500  | 0.08644600  |
| C | 1.08713400  | -8.24879800  | -1.10367200 |

|   |             |             |             |
|---|-------------|-------------|-------------|
| H | 0.06111700  | -8.27875200 | -0.74467900 |
| O | 2.03074900  | -8.63992900 | 1.16276700  |
| C | -0.31077200 | 8.45603200  | -0.12011200 |
| C | -0.86218700 | 7.85967300  | -2.86580800 |
| C | 0.72978000  | 8.38821400  | -1.07325800 |
| H | 1.75299300  | 8.45853900  | -0.70877200 |
| C | -1.63714700 | 8.30955300  | -0.56241600 |
| H | -2.46927500 | 8.35408000  | 0.13676100  |
| C | -1.88537700 | 7.98678100  | -1.90548900 |
| H | -2.90904000 | 7.73496200  | -2.17263800 |
| C | 0.47591600  | 8.13634800  | -2.43366000 |
| C | 1.54518600  | 8.10803500  | -3.46055500 |
| C | -1.08181000 | 7.40022500  | -4.26360200 |
| C | 0.05642700  | 6.64469800  | -4.85520900 |
| C | 1.37847000  | 7.05100600  | -4.48464900 |
| C | -0.10267000 | 5.54173400  | -5.72128800 |
| H | -1.09017100 | 5.12707500  | -5.90965900 |
| C | 2.46275100  | 6.37312300  | -5.06991700 |
| H | 3.47700200  | 6.61326300  | -4.75724300 |
| C | 2.29918400  | 5.32500900  | -5.98319600 |
| H | 3.18636900  | 4.84615200  | -6.38810600 |
| C | 1.00399400  | 4.86528500  | -6.28018600 |
| O | 0.71395000  | 3.73987400  | -7.02729400 |
| C | 1.39905200  | 1.48997400  | -7.75417400 |
| C | 1.80241600  | 2.94751500  | -7.55273800 |
| C | -2.20038200 | 7.72905100  | -5.00367300 |
| C | 2.53625200  | 9.06574700  | -3.51075800 |
| S | -2.45673600 | 7.24894800  | -6.71920900 |
| S | -3.51794400 | 8.80501200  | -4.41847600 |
| S | 2.70134000  | 10.40729500 | -2.32310900 |
| S | 3.72959400  | 9.21491800  | -4.84930500 |
| C | -4.30851600 | 9.01518100  | -5.97538700 |
| H | -5.16199800 | 9.68905400  | -6.01409600 |
| C | -3.82690700 | 8.31072100  | -7.01701200 |
| H | -4.23206500 | 8.32949100  | -8.02678200 |
| C | 4.32108000  | 10.81125300 | -4.40283700 |

|   |             |             |             |
|---|-------------|-------------|-------------|
| H | 5.05208200  | 11.27470000 | -5.06233400 |
| C | 3.85461800  | 11.34996800 | -3.26013100 |
| H | 4.15217500  | 12.31612700 | -2.85735600 |
| H | 2.14843400  | 3.40919600  | -8.49586300 |
| H | 2.64625000  | 2.94812100  | -6.84730300 |
| O | 0.08370600  | 8.61467000  | 1.18486000  |
| C | -0.88359100 | 8.46794700  | 2.25935100  |
| H | -1.57317600 | 7.64397900  | 2.02508600  |
| H | -1.47367900 | 9.39702600  | 2.34604700  |
| C | -0.11298000 | 8.14745400  | 3.55316100  |
| H | 0.48252400  | 9.02221700  | 3.85794200  |
| H | 0.60011000  | 7.34787700  | 3.31262900  |
| C | -1.02325100 | 7.67142300  | 4.71832700  |
| H | -1.61627800 | 8.51512400  | 5.10947800  |
| H | -1.74679900 | 6.94403800  | 4.32080900  |
| C | -0.23142100 | 6.99123600  | 5.87052400  |
| H | 0.30872300  | 7.75462100  | 6.45561700  |
| H | 0.54158000  | 6.35175000  | 5.41936700  |
| C | -1.09055600 | 6.10405000  | 6.81450100  |
| H | -1.72595500 | 6.73530500  | 7.45856000  |
| H | -1.77833700 | 5.50941700  | 6.19545400  |
| C | -0.24466100 | 5.13192300  | 7.68229400  |
| H | 0.25545200  | 5.69020500  | 8.49226300  |
| H | 0.56266800  | 4.72762300  | 7.05280700  |
| C | -1.01951200 | 3.92673200  | 8.28185000  |
| H | -1.72961200 | 4.27339800  | 9.05229900  |
| H | -1.62881300 | 3.46951500  | 7.48847700  |
| C | 0.79318100  | -8.49314900 | 1.90715300  |
| H | 0.21198000  | -7.64802900 | 1.51312700  |
| H | 0.18815000  | -9.41058300 | 1.80189500  |
| C | 1.23147700  | -8.23798700 | 3.36673900  |
| H | 1.76723400  | -9.12931900 | 3.72932500  |
| H | 1.97448300  | -7.43027700 | 3.32009900  |
| C | 0.12979900  | -7.82980700 | 4.38483000  |
| H | -0.45726700 | -8.71087000 | 4.69315600  |
| H | -0.57739600 | -7.13619200 | 3.90790800  |



|   |              |             |             |
|---|--------------|-------------|-------------|
| C | 0.75353500   | -7.12938100 | 5.62661400  |
| H | 1.33810100   | -7.86345200 | 6.20717200  |
| H | 1.48107900   | -6.39250600 | 5.25498800  |
| C | -0.23359000  | -6.38213900 | 6.56415100  |
| H | -0.81976600  | -7.10291400 | 7.15902900  |
| H | -0.95800400  | -5.83367500 | 5.94504000  |
| C | 0.48230000   | -5.36692700 | 7.49970300  |
| H | 1.05760200   | -5.90964100 | 8.26926200  |
| H | 1.22658100   | -4.82347600 | 6.89741500  |
| C | -0.43930600  | -4.31669400 | 8.18280400  |
| H | -1.01684300  | -4.78881500 | 8.99608600  |
| H | -1.17761600  | -3.96064900 | 7.45035400  |
| C | 0.35282300   | -3.10505600 | 8.73719300  |
| H | 1.03951400   | -2.74469500 | 7.95889000  |
| H | 0.99438600   | -3.44740800 | 9.56815800  |
| C | -0.06883200  | 2.85936800  | 8.88347700  |
| H | 0.75784500   | 2.68764900  | 8.17878500  |
| H | 0.39584500   | 3.26752600  | 9.79807500  |
| C | -0.70569400  | 1.48272700  | 9.23284500  |
| H | -1.17439900  | 1.03775800  | 8.34476100  |
| H | -1.52495200  | 1.64982200  | 9.95780900  |
| C | 0.31618400   | 0.53177300  | 9.83644900  |
| H | 1.10985500   | 1.04663100  | 10.39140000 |
| C | 0.40089000   | -0.81675200 | 9.83523700  |
| H | 1.25468700   | -1.22888400 | 10.38687000 |
| C | -0.48897700  | -1.89564600 | 9.23866000  |
| H | -1.18813200  | -2.25502600 | 10.01794500 |
| H | -1.11356200  | -1.49536100 | 8.42688500  |
| H | -11.94792700 | -4.07467800 | -4.40101000 |
| H | -11.96360400 | -5.61472800 | -2.53003400 |
| H | -12.01837200 | -6.23445000 | -0.52921200 |
| H | -12.12275300 | -6.00642300 | 1.88130200  |
| H | -12.23464900 | -5.02846800 | 3.73042000  |
| H | -12.37341600 | -3.15505400 | 5.26197200  |
| H | -12.48165300 | -1.14639500 | 5.84892400  |
| H | -12.56899900 | 1.26248300  | 5.59881500  |

|   |              |             |             |
|---|--------------|-------------|-------------|
| H | -11.97868800 | -2.23360900 | -5.39627100 |
| H | -12.06215200 | 0.17542800  | -5.64882200 |
| H | -12.16446400 | 2.18119000  | -5.05342600 |
| H | -12.29927600 | 4.05525500  | -3.52234100 |
| H | -12.41180600 | 5.04013000  | -1.67659500 |
| H | -12.52066700 | 5.26492400  | 0.73412100  |
| H | -12.58136400 | 4.64316900  | 2.73228900  |
| H | -12.60026700 | 3.10689100  | 4.60644000  |
| C | -11.00262200 | -4.31253800 | -3.91566900 |
| C | -11.01160500 | -5.19203300 | -2.84749300 |
| C | -11.09089100 | -6.07505800 | 0.01862300  |
| C | -11.15049600 | -5.94501200 | 1.39484500  |
| C | -11.31191800 | -4.53952100 | 4.03897700  |
| C | -11.39117300 | -3.47009700 | 4.91318200  |
| C | -11.54463800 | -0.59815000 | 5.76453100  |
| C | -11.59450500 | 0.77716700  | 5.62153700  |
| C | -11.04743200 | -1.67217800 | -5.33884800 |
| C | -11.09505100 | -0.29692800 | -5.48335000 |
| C | -11.24141300 | 2.57471100  | -4.63046400 |
| C | -11.31832000 | 3.64454400  | -3.75642600 |
| C | -11.48028900 | 5.05079500  | -1.11275000 |
| C | -11.54250100 | 5.17876400  | 0.26349500  |
| C | -11.62880400 | 4.29515000  | 3.12879100  |
| C | -11.63966400 | 3.41797800  | 4.19878700  |
| C | -9.81455900  | -3.61910900 | -4.29649500 |
| C | -9.83287600  | -5.44230700 | -2.08243000 |
| C | -9.87131400  | -5.86966200 | -0.69390800 |
| C | -9.99487900  | -5.59885900 | 2.15793200  |
| C | -10.07303900 | -4.91670700 | 3.43858700  |
| C | -10.23703100 | -2.70093200 | 5.25043700  |
| C | -10.31148500 | -1.31023400 | 5.66528600  |
| C | -10.41479100 | 1.54033500  | 5.36977900  |
| C | -9.83630300  | -2.33963100 | -4.98537000 |
| C | -9.93497100  | 0.51069800  | -5.28509900 |
| C | -10.00583200 | 1.90230200  | -4.87265900 |
| C | -10.16520000 | 4.11868900  | -3.06139600 |

|   |              |             |             |
|---|--------------|-------------|-------------|
| C | -10.24361900 | 4.79865400  | -1.77951900 |
| C | -10.37237100 | 5.06369300  | 1.07274200  |
| C | -10.41424300 | 4.63691700  | 2.46128700  |
| C | -10.43656100 | 2.81924300  | 4.67985000  |
| C | -8.58191900  | -4.08425300 | -3.74249100 |
| C | -8.59116300  | -4.99841800 | -2.63356300 |
| C | -8.66638500  | -5.83026300 | 0.07377200  |
| C | -8.72823700  | -5.69335800 | 1.50289700  |
| C | -8.88106600  | -4.36142000 | 3.99840900  |
| C | -8.96343100  | -3.25119800 | 4.90703800  |
| C | -9.10817600  | -0.54135900 | 5.72045500  |
| C | -9.16000600  | 0.88717700  | 5.57319200  |
| C | -8.62449000  | -1.58820300 | -5.08447900 |
| C | -8.67382300  | -0.15989400 | -5.23559100 |
| C | -8.81196300  | 2.55299200  | -4.43234900 |
| C | -8.89180600  | 3.66378200  | -3.52413600 |
| C | -9.04491200  | 4.98719400  | -1.02442700 |
| C | -9.10969000  | 5.11908300  | 0.40526700  |
| C | -9.19125100  | 4.29005700  | 3.11441800  |
| C | -9.20250300  | 3.38019000  | 4.22689100  |
| C | -7.34125600  | -3.47335700 | -4.13446000 |
| C | -7.35938100  | -5.27823800 | -1.94761100 |
| C | -7.39712400  | -5.69630700 | -0.58673500 |
| C | -7.51924000  | -5.42201100 | 2.23176800  |
| C | -7.59599300  | -4.75129200 | 3.48567600  |
| C | -7.75837200  | -2.56242300 | 5.27986100  |
| C | -7.83147000  | -1.20100000 | 5.69102100  |
| C | -7.93363100  | 1.61711000  | 5.40320800  |
| C | -7.36267500  | -2.21852100 | -4.80807500 |
| C | -7.46017200  | 0.59963400  | -5.10702700 |
| C | -7.52945900  | 1.96395200  | -4.70445100 |
| C | -7.68692000  | 4.15350800  | -2.91220800 |
| C | -7.76396800  | 4.81739200  | -1.65440900 |
| C | -7.89143900  | 5.07765400  | 1.16675800  |
| C | -7.93260300  | 4.66251900  | 2.52871800  |
| C | -7.95489700  | 2.86962300  | 4.72580400  |

|   |             |             |             |
|---|-------------|-------------|-------------|
| C | -6.10088300 | -3.98744600 | -3.63935800 |
| C | -6.10990400 | -4.90210800 | -2.53463000 |
| C | -6.18518300 | -5.73267900 | 0.17353700  |
| C | -6.24674000 | -5.59108100 | 1.59912700  |
| C | -6.39953500 | -4.25354600 | 4.09322400  |
| C | -6.48195800 | -3.14735000 | 5.00204000  |
| C | -6.62748400 | -0.43932800 | 5.82440900  |
| C | -6.67923200 | 0.98629300  | 5.68007900  |
| C | -6.14357100 | -1.48863900 | -4.97934700 |
| C | -6.19237100 | -0.06345900 | -5.13251800 |
| C | -6.33060000 | 2.65162700  | -4.33278200 |
| C | -6.41036100 | 3.75897600  | -3.42512000 |
| C | -6.56328000 | 5.07670300  | -0.92053500 |
| C | -6.62827900 | 5.20757600  | 0.50641400  |
| C | -6.71027300 | 4.38347700  | 3.21878700  |
| C | -6.72133200 | 3.47837400  | 4.33111300  |
| C | -4.87007500 | -3.38893100 | -4.04600800 |
| C | -4.88819500 | -5.20377400 | -1.85980200 |
| C | -4.92585600 | -5.62420200 | -0.49024900 |
| C | -5.04767500 | -5.33784000 | 2.33250700  |
| C | -5.12507600 | -4.65872300 | 3.59222900  |
| C | -5.28854300 | -2.46945800 | 5.39521200  |
| C | -5.36251700 | -1.10125900 | 5.81453800  |
| C | -5.46474000 | 1.72169600  | 5.53002200  |
| C | -4.89176400 | -2.12544600 | -4.72307600 |
| C | -4.98879700 | 0.69852500  | -5.02711000 |
| C | -5.05831200 | 2.07257000  | -4.62491100 |
| C | -5.21605600 | 4.26289300  | -2.82635100 |
| C | -5.29382700 | 4.92426000  | -1.55710200 |
| C | -5.42233200 | 5.18651000  | 1.27015100  |
| C | -5.46370700 | 4.77176800  | 2.64149600  |
| C | -5.48598700 | 2.98097500  | 4.84669100  |
| C | -3.62921300 | -3.89835200 | -3.53943800 |
| C | -3.63769600 | -4.81637400 | -2.44329800 |
| C | -3.71237700 | -5.65047200 | 0.27393100  |
| C | -3.77386600 | -5.50096300 | 1.69448800  |

|   |             |             |             |
|---|-------------|-------------|-------------|
| C | -3.92760600 | -4.14781300 | 4.19327000  |
| C | -4.00994700 | -3.04829200 | 5.10246600  |
| C | -4.15709700 | -0.33560400 | 5.94057400  |
| C | -4.20833900 | 1.08455800  | 5.79673700  |
| C | -3.67211900 | -1.38918900 | -4.88570700 |
| C | -3.71951500 | 0.03178900  | -5.03961700 |
| C | -3.85784300 | 2.75869200  | -4.24357800 |
| C | -3.93786700 | 3.85980300  | -3.33582500 |
| C | -4.09165600 | 5.16406400  | -0.81483000 |
| C | -4.15739000 | 5.30063400  | 0.60604000  |
| C | -4.23945200 | 4.48007200  | 3.32828700  |
| C | -4.24992700 | 3.58118600  | 4.43844500  |
| C | -2.39740300 | -3.28615800 | -3.93356400 |
| C | -2.41395600 | -5.11088500 | -1.76108400 |
| C | -2.45065900 | -5.53454300 | -0.39291900 |
| C | -2.57241600 | -5.23046400 | 2.42610300  |
| C | -2.65034600 | -4.54268900 | 3.68075700  |
| C | -2.81443700 | -2.36208900 | 5.48971000  |
| C | -2.88825400 | -0.99833900 | 5.91950000  |
| C | -2.98940300 | 1.81701300  | 5.63062400  |
| C | -2.41900500 | -2.02638900 | -4.61662500 |
| C | -2.51316100 | 0.79544400  | -4.91941000 |
| C | -2.58194700 | 2.17167600  | -4.52432300 |
| C | -2.74106200 | 4.35137000  | -2.72234500 |
| C | -2.81954600 | 4.99110800  | -1.44584300 |
| C | -2.94853800 | 5.26337700  | 1.37007100  |
| C | -2.98943800 | 4.85304500  | 2.73998600  |
| C | -3.01037800 | 3.07133700  | 4.94228600  |
| C | -1.16419600 | -3.77423600 | -3.41099000 |
| C | -1.17034900 | -4.70174000 | -2.32854700 |
| C | -1.24077700 | -5.53392200 | 0.36771100  |
| C | -1.30324000 | -5.37208600 | 1.78690000  |
| C | -1.45846900 | -4.01466900 | 4.26292300  |
| C | -1.53991600 | -2.92085200 | 5.17553500  |
| C | -1.68550800 | -0.23726600 | 6.02948500  |
| C | -1.73606000 | 1.18074300  | 5.87749600  |

|   |             |             |             |
|---|-------------|-------------|-------------|
| C | -1.20439000 | -1.29025100 | -4.75856500 |
| C | -1.25154700 | 0.12903000  | -4.90277400 |
| C | -1.38568700 | 2.84343200  | -4.12423600 |
| C | -1.46608200 | 3.94136600  | -3.21399600 |
| C | -1.62317200 | 5.21563700  | -0.70469300 |
| C | -1.68751400 | 5.35522900  | 0.70957400  |
| C | -1.76698100 | 4.54650700  | 3.40913600  |
| C | -1.77689000 | 3.64919200  | 4.51695600  |
| C | 0.06878200  | -3.16989700 | -3.80715200 |
| C | 0.05590200  | -4.98674100 | -1.65299500 |
| C | 0.02054700  | -5.39250600 | -0.29202500 |
| C | -0.10197000 | -5.07554100 | 2.50647500  |
| C | -0.17951500 | -4.39809200 | 3.75262500  |
| C | -0.34136600 | -2.24144200 | 5.56377300  |
| C | -0.41343400 | -0.89272100 | 6.00436400  |
| C | -0.51378500 | 1.90443100  | 5.70528400  |
| C | 0.04863900  | -1.92226000 | -4.48432500 |
| C | -0.04394200 | 0.88185900  | -4.76443000 |
| C | -0.11083100 | 2.24660900  | -4.37693400 |
| C | -0.27099300 | 4.42324100  | -2.59254300 |
| C | -0.35013700 | 5.07621900  | -1.33486900 |
| C | -0.47653300 | 5.33584300  | 1.46874900  |
| C | -0.51676300 | 4.92162800  | 2.82617000  |
| C | -0.53511600 | 3.14559500  | 5.01567200  |
| C | 1.30867400  | -3.68181600 | -3.32112600 |
| C | 1.30228600  | -4.59823700 | -2.23332000 |
| C | 1.23295500  | -5.38996300 | 0.46494900  |
| C | 1.17104500  | -5.23096700 | 1.87767100  |
| C | 1.01550300  | -3.90031400 | 4.35694100  |
| C | 0.93515700  | -2.81268800 | 5.27307000  |
| C | 0.79229200  | -0.13581700 | 6.14680400  |
| C | 0.74133500  | 1.28093500  | 5.98809800  |
| C | 1.26814800  | -1.19870400 | -4.65318700 |
| C | 1.21960900  | 0.21781000  | -4.77610200 |
| C | 1.08716500  | 2.91732600  | -3.97997900 |
| C | 1.00776100  | 4.02091000  | -3.08464900 |

|   |            |             |             |
|---|------------|-------------|-------------|
| C | 0.84757200 | 5.34954800  | -0.60317900 |
| C | 0.78442300 | 5.48133100  | 0.81473900  |
| C | 0.70745700 | 4.64627600  | 3.50908000  |
| C | 0.69805400 | 3.74689100  | 4.61510100  |
| C | 2.53964800 | -3.09918500 | -3.74568700 |
| C | 2.52686000 | -4.89313500 | -1.56578900 |
| C | 2.49073000 | -5.28231000 | -0.19494000 |
| C | 2.36842000 | -4.98291500 | 2.61128100  |
| C | 2.29078100 | -4.31210100 | 3.86875300  |
| C | 2.13108800 | -2.15242500 | 5.68798100  |
| C | 2.05874000 | -0.79447200 | 6.13072700  |
| C | 1.95620000 | 2.01641600  | 5.83578200  |
| C | 2.51946000 | -1.84171000 | -4.41885300 |
| C | 2.42431800 | 0.97019400  | -4.66707800 |
| C | 2.35733200 | 2.33566800  | -4.26097600 |
| C | 2.19799200 | 4.52949600  | -2.48764900 |
| C | 2.11825000 | 5.21186500  | -1.23577800 |
| C | 1.98954200 | 5.48516100  | 1.57793600  |
| C | 1.95116200 | 5.05760700  | 2.94314700  |
| C | 1.93391400 | 3.26769800  | 5.14205600  |
| C | 3.78160100 | -3.61963200 | -3.26261500 |
| C | 3.77398800 | -4.51994200 | -2.15699200 |
| C | 3.70019700 | -5.30334500 | 0.56548700  |
| C | 3.63957400 | -5.15811600 | 1.98161300  |
| C | 3.48652900 | -3.82836600 | 4.48700400  |
| C | 3.40614600 | -2.73738000 | 5.40395500  |
| C | 3.26439800 | -0.03247600 | 6.25578900  |
| C | 3.21234600 | 1.38718500  | 6.10937500  |
| C | 3.73885700 | -1.11344700 | -4.58968900 |
| C | 3.69037600 | 0.30702000  | -4.70961600 |
| C | 3.55543500 | 3.01898400  | -3.88352900 |
| C | 3.47512400 | 4.12338900  | -2.98633600 |
| C | 3.31666400 | 5.48373600  | -0.50202100 |
| C | 3.25222600 | 5.62239300  | 0.91841000  |
| C | 3.17364600 | 4.78319200  | 3.63507300  |
| C | 3.16484000 | 3.87989300  | 4.74194400  |

|   |            |             |             |
|---|------------|-------------|-------------|
| C | 5.01739100 | -3.02456500 | -3.67929000 |
| C | 5.00016900 | -4.81065700 | -1.47655100 |
| C | 4.96269700 | -5.20374800 | -0.10048700 |
| C | 4.84104800 | -4.91002700 | 2.72076300  |
| C | 4.76433100 | -4.23884000 | 3.98369500  |
| C | 4.60640100 | -2.06247300 | 5.80164300  |
| C | 4.53472300 | -0.69668300 | 6.22799300  |
| C | 4.43056900 | 2.12526100  | 5.94339100  |
| C | 4.99597300 | -1.75706700 | -4.34710200 |
| C | 4.89830300 | 1.06921700  | -4.59998800 |
| C | 4.83003000 | 2.43771500  | -4.17997300 |
| C | 4.67137200 | 4.63769400  | -2.39158600 |
| C | 4.59220200 | 5.32367700  | -1.13621800 |
| C | 4.46312500 | 5.60121500  | 1.68590800  |
| C | 4.42341100 | 5.17994300  | 3.05535800  |
| C | 4.40658800 | 3.38329600  | 5.25757000  |
| C | 6.25494700 | -3.52848100 | -3.17499200 |
| C | 6.24597500 | -4.43154400 | -2.06127500 |
| C | 6.16974900 | -5.22108400 | 0.66035400  |
| C | 6.10871000 | -5.07047500 | 2.08526600  |
| C | 5.95834000 | -3.73844800 | 4.58470800  |
| C | 5.87836700 | -2.63836400 | 5.50107200  |
| C | 5.73726300 | 0.06516500  | 6.33816200  |
| C | 5.68444400 | 1.49095500  | 6.19652000  |
| C | 6.21138000 | -1.02195900 | -4.49733600 |
| C | 6.16224700 | 0.40577400  | -4.62520200 |
| C | 6.02539800 | 3.11498400  | -3.79294900 |
| C | 5.94497200 | 4.22530800  | -2.88876100 |
| C | 5.78931400 | 5.57390300  | -0.40019000 |
| C | 5.72409100 | 5.71546500  | 1.02552200  |
| C | 5.64442400 | 4.89033400  | 3.73659400  |
| C | 5.63585600 | 3.98329900  | 4.84745700  |
| C | 7.48782400 | -2.91806400 | -3.57022800 |
| C | 7.46977900 | -4.70652900 | -1.37120300 |
| C | 7.43175300 | -5.10390900 | -0.00373100 |
| C | 7.30989700 | -4.80391000 | 2.81557000  |



|   |            |             |             |
|---|------------|-------------|-------------|
| C | 7.23440200 | -4.13374500 | 4.07036800  |
| C | 7.07737500 | -1.95453400 | 5.87878200  |
| C | 7.00625200 | -0.59572000 | 6.29902800  |
| C | 6.90191700 | 2.22316900  | 6.02328700  |
| C | 7.46613000 | -1.65808700 | -4.23452100 |
| C | 7.36800600 | 1.16558700  | -4.49067700 |
| C | 7.29934000 | 2.52583000  | -4.07198900 |
| C | 7.14137500 | 4.72054500  | -2.28013800 |
| C | 7.06302000 | 5.39742400  | -1.02926000 |
| C | 6.93434800 | 5.68213600  | 1.78865300  |
| C | 6.89427200 | 5.26997600  | 3.15136500  |
| C | 6.87745300 | 3.47654900  | 5.34768100  |
| C | 8.73642600 | -3.43095100 | -3.07604500 |
| C | 8.72735800 | -4.33842300 | -1.96154700 |
| C | 8.65092900 | -5.13411300 | 0.75708000  |
| C | 8.58936300 | -4.98120600 | 2.18521100  |
| C | 8.43969600 | -3.64426000 | 4.68127100  |
| C | 8.36005000 | -2.53914500 | 5.59679500  |
| C | 8.21864100 | 0.16457000  | 6.43185100  |
| C | 8.16555400 | 1.59395100  | 6.29409300  |
| C | 8.69287100 | -0.92693600 | -4.39989600 |
| C | 8.64331800 | 0.50388900  | -4.52948300 |
| C | 8.50590800 | 3.21075000  | -3.69662000 |
| C | 8.42576700 | 4.32203100  | -2.78807000 |
| C | 8.27061700 | 5.66724000  | -0.29834800 |
| C | 8.20525800 | 5.81381700  | 1.12988600  |
| C | 8.12521300 | 4.99882000  | 3.84212300  |
| C | 8.11673000 | 4.08982500  | 4.95514900  |
| C | 9.96975200 | -2.86845000 | -3.52887200 |
| C | 9.95146600 | -4.67939100 | -1.30719000 |
| C | 9.91235200 | -5.08795200 | 0.08683900  |
| C | 9.78917900 | -4.78439000 | 2.93653300  |
| C | 9.71258000 | -4.09762600 | 4.21510500  |
| C | 9.55386200 | -1.89049900 | 6.04022200  |
| C | 9.48126700 | -0.50390800 | 6.46885000  |
| C | 9.37541800 | 2.34820400  | 6.19634900  |

|   |             |             |             |
|---|-------------|-------------|-------------|
| C | 9.94751300  | -1.58400200 | -4.20805100 |
| C | 9.84841200  | 1.27027600  | -4.46844400 |
| C | 9.77810300  | 2.65753500  | -4.04076400 |
| C | 9.61841300  | 4.87378200  | -2.22610000 |
| C | 9.53875800  | 5.56381300  | -0.94952900 |
| C | 9.40840600  | 5.85886500  | 1.89980300  |
| C | 9.36701600  | 5.44305700  | 3.29150300  |
| C | 9.34999500  | 3.62955300  | 5.51176500  |
| C | 11.17379700 | -3.46915200 | -3.05197700 |
| C | 11.16498700 | -4.34338900 | -1.97977600 |
| C | 11.08410200 | -5.18987200 | 0.89575600  |
| C | 11.02474700 | -5.04343700 | 2.27027100  |
| C | 10.86666300 | -3.62267800 | 4.90798500  |
| C | 10.79020200 | -2.55790300 | 5.78815700  |
| C | 10.64023900 | 0.30421400  | 6.67256000  |
| C | 10.58907700 | 1.68055500  | 6.54154600  |
| C | 11.12775700 | -0.81981000 | -4.45465300 |
| C | 11.07992200 | 0.55719600  | -4.58025200 |
| C | 10.93450900 | 3.42043100  | -3.69677700 |
| C | 10.85749200 | 4.48914900  | -2.82133900 |
| C | 10.69315700 | 5.91329900  | -0.18615300 |
| C | 10.63023000 | 6.05634800  | 1.18854100  |
| C | 10.54450000 | 5.20251800  | 4.06186700  |
| C | 10.53637100 | 4.32738000  | 5.13333400  |
| H | 12.13354200 | -3.15945100 | -3.46276700 |
| H | 12.11808400 | -4.69123100 | -1.58433400 |
| H | 12.06146300 | -5.28118400 | 0.42441100  |
| H | 11.95748000 | -5.02568300 | 2.83185900  |
| H | 11.84779100 | -4.03045700 | 4.66974000  |
| H | 11.71374000 | -2.16519200 | 6.21072200  |
| H | 11.60876700 | -0.16757300 | 6.83097700  |
| H | 11.51918200 | 2.24363500  | 6.60110900  |
| H | 12.10145200 | -1.30711700 | -4.44094900 |
| H | 12.01769100 | 1.10463300  | -4.66171000 |
| H | 11.91671900 | 3.10134300  | -4.04195800 |
| H | 11.78181200 | 4.97258700  | -2.50883700 |

|   |             |            |             |
|---|-------------|------------|-------------|
| H | 11.66684000 | 5.96865300 | -0.67053500 |
| H | 11.55660100 | 6.21890600 | 1.73725700  |
| H | 11.49520500 | 5.62935400 | 3.74611300  |
| H | 11.48087900 | 4.09583600 | 5.62325100  |

**(9,9)@Cycle-9**

|   |             |             |             |
|---|-------------|-------------|-------------|
| C | 0.47749600  | 0.08470100  | -8.32268000 |
| C | -1.85440100 | 0.58361900  | -8.29670300 |
| C | 0.20745600  | -1.30435100 | -8.28399000 |
| H | 1.52469500  | 0.39315700  | -8.30820900 |
| C | -2.12453100 | -0.80534000 | -8.25965100 |
| H | -2.69447700 | 1.27749900  | -8.26745200 |
| H | 1.04834400  | -1.99631800 | -8.24328300 |
| H | -3.17050300 | -1.11123800 | -8.19982200 |
| C | -1.15078000 | -8.48696100 | -2.43946600 |
| C | -3.39005700 | -8.99884500 | -3.45911000 |
| C | -2.21073600 | -8.27193400 | -3.48491700 |
| C | -1.86284300 | -7.33965600 | -4.61655400 |
| C | -2.80393300 | -6.60125300 | -5.37108500 |
| C | -0.14814200 | -6.11284100 | -5.90979100 |
| C | -2.46431800 | -5.63873000 | -6.34438100 |
| H | -3.86159900 | -6.67721700 | -5.13547800 |
| H | 0.89762500  | -5.84933600 | -6.05191100 |
| H | -3.27390300 | -5.09081000 | -6.82217800 |
| C | -1.11094100 | -1.79321100 | -8.17160500 |
| C | -1.11691800 | -5.30055000 | -6.56472100 |
| C | -1.57183600 | -3.28041800 | -7.97314300 |
| H | -1.79393000 | -3.72768200 | -8.95737500 |
| H | -2.50911000 | -3.22881200 | -7.40260100 |
| O | -0.64356600 | -4.19632900 | -7.28924900 |
| C | -0.48817300 | -7.13421400 | -4.97701500 |
| C | 0.49992600  | -8.03626700 | -4.32038600 |
| C | 1.55330200  | -8.58291700 | -5.03293500 |
| S | 1.93161100  | -8.17806800 | -6.74478700 |
| S | 2.61811300  | -9.90042100 | -4.42260400 |
| C | 3.05863600  | -9.50018400 | -7.01807500 |

|   |             |              |             |
|---|-------------|--------------|-------------|
| H | 3.46607100  | -9.60807300  | -8.02130600 |
| C | 3.37020700  | -10.27996000 | -5.96550800 |
| H | 4.06950100  | -11.11345900 | -5.98643300 |
| S | -4.63816000 | -8.97908400  | -4.75518100 |
| C | -5.19829000 | -10.89409900 | -2.99649000 |
| H | -5.69743200 | -11.72693800 | -2.50518900 |
| S | -3.80654700 | -10.19865400 | -2.18140900 |
| C | -5.57635200 | -10.34205300 | -4.16469900 |
| H | -6.42787700 | -10.65738100 | -4.76422800 |
| C | -0.35177500 | -8.92694000  | -0.10250000 |
| C | 0.19731200  | -8.43217500  | -2.91110600 |
| C | 1.21748500  | -8.69843700  | -1.96763200 |
| H | 2.25923800  | -8.59453100  | -2.26170000 |
| C | 0.96130800  | -8.97321400  | -0.62699100 |
| H | 1.78932200  | -9.10808800  | 0.06675300  |
| C | -1.40286700 | -8.71945300  | -1.03747100 |
| H | -2.41945900 | -8.62114700  | -0.66564700 |
| O | -0.33525300 | -8.99529100  | 1.29231500  |
| C | -0.56244200 | 8.88237200   | -0.73686700 |
| C | -1.45949600 | 8.12267800   | -3.40026600 |
| C | 0.35170700  | 8.59287300   | -1.79530400 |
| H | 1.40402900  | 8.53382000   | -1.52783400 |
| C | -1.92614800 | 8.90104000   | -1.07516900 |
| H | -2.68400100 | 9.11123400   | -0.32216400 |
| C | -2.34150800 | 8.49797700   | -2.36022000 |
| H | -3.41279200 | 8.37938200   | -2.50076000 |
| C | -0.05735500 | 8.23451400   | -3.11290100 |
| C | 0.87848200  | 7.95291500   | -4.25014600 |
| C | -1.90610400 | 7.59718900   | -4.73422100 |
| C | -0.96186400 | 6.66984500   | -5.43993100 |
| C | 0.43790200  | 6.91434600   | -5.23999600 |
| C | -1.36244800 | 5.57919600   | -6.26738500 |
| H | -2.41157600 | 5.29774300   | -6.30624100 |
| C | 1.32500300  | 6.10757600   | -5.98772800 |
| H | 2.39651500  | 6.20840800   | -5.83568200 |
| C | 0.91617900  | 5.06740600   | -6.84567800 |

|   |             |             |             |
|---|-------------|-------------|-------------|
| H | 1.68773600  | 4.47721800  | -7.33572400 |
| C | -0.44330800 | 4.72187200  | -6.93912000 |
| O | -0.96172400 | 3.55590200  | -7.53237400 |
| C | -0.53414100 | 1.07845700  | -8.25655700 |
| C | -0.07011800 | 2.57977900  | -8.18784500 |
| C | -3.06157500 | 8.04202500  | -5.35486200 |
| C | 2.01602200  | 8.71901200  | -4.44166100 |
| S | -3.60101400 | 7.51080500  | -6.98794100 |
| S | -4.13852700 | 9.32799100  | -4.70324000 |
| S | 2.54046500  | 10.04017800 | -3.33765900 |
| S | 3.07524000  | 8.62771900  | -5.89402400 |
| C | -5.08707500 | 9.56061600  | -6.16437800 |
| H | -5.84025700 | 10.34581600 | -6.14922800 |
| C | -4.84251400 | 8.73621700  | -7.20038000 |
| H | -5.36729700 | 8.75283800  | -8.15350500 |
| C | 3.99525800  | 10.08954200 | -5.56790000 |
| H | 4.73188300  | 10.39022700 | -6.31020500 |
| C | 3.75150600  | 10.72955900 | -4.40873900 |
| H | 4.26097500  | 11.62934000 | -4.06962400 |
| H | 0.10411600  | 2.94535900  | -9.21442200 |
| H | 0.89408900  | 2.56861300  | -7.66234700 |
| O | -0.03507700 | 9.03731400  | 0.54419300  |
| C | -0.89341700 | 9.14670600  | 1.75544400  |
| H | -1.74698900 | 8.46623200  | 1.64869200  |
| H | -1.27763500 | 10.17865400 | 1.79956600  |
| C | -0.07527400 | 8.79410900  | 3.06445700  |
| H | 0.60937300  | 9.62915400  | 3.27972800  |
| H | 0.55879700  | 7.93722500  | 2.82693200  |
| C | -0.91847000 | 8.45604600  | 4.37818000  |
| H | -1.37756900 | 9.38569200  | 4.75321900  |
| H | -1.75333700 | 7.80337400  | 4.09447500  |
| C | -0.11694700 | 7.76655300  | 5.58295400  |
| H | 0.46865200  | 8.54785100  | 6.09506100  |
| H | 0.62154700  | 7.07693400  | 5.15834200  |
| C | -0.97526800 | 6.97538700  | 6.67775400  |
| H | -1.48668900 | 7.71315300  | 7.31841900  |

|   |             |             |             |
|---|-------------|-------------|-------------|
| H | -1.77291200 | 6.43175500  | 6.15855800  |
| C | -0.19455700 | 5.94487800  | 7.62000900  |
| H | 0.39404400  | 6.52126800  | 8.35350500  |
| H | 0.54139300  | 5.40657400  | 7.01140600  |
| C | -1.06105200 | 4.85807100  | 8.40976500  |
| H | -1.61836400 | 5.36658900  | 9.21427300  |
| H | -1.82376500 | 4.46455800  | 7.72716400  |
| C | -1.39463400 | -8.87793500 | 2.31220500  |
| H | -2.12256600 | -8.11422700 | 2.01877200  |
| H | -1.91691300 | -9.84658100 | 2.37810600  |
| C | -0.68093300 | -8.52933400 | 3.69588400  |
| H | -0.15355200 | -9.43938800 | 4.02168900  |
| H | 0.09919200  | -7.79832300 | 3.46276500  |
| C | -1.54732000 | -7.97062600 | 4.91690200  |
| H | -2.11456600 | -8.80520800 | 5.36058300  |
| H | -2.29738700 | -7.27225100 | 4.53108500  |
| C | -0.72634600 | -7.24214100 | 6.08587800  |
| H | -0.22378400 | -8.01772100 | 6.68768600  |
| H | 0.07947800  | -6.65513500 | 5.62839500  |
| C | -1.53787400 | -6.28092500 | 7.07094200  |
| H | -2.18477400 | -6.90082100 | 7.71436000  |
| H | -2.21988800 | -5.66956900 | 6.46891100  |
| C | -0.67304100 | -5.31017900 | 8.00231900  |
| H | -0.18026700 | -5.92170200 | 8.77673300  |
| H | 0.14047600  | -4.89439100 | 7.39505500  |
| C | -1.43040800 | -4.09699600 | 8.72910600  |
| H | -1.98613000 | -4.50349900 | 9.59038400  |
| H | -2.19270800 | -3.70355300 | 8.04860600  |
| C | -0.51642600 | -2.88859200 | 9.23889800  |
| H | 0.26826900  | -2.71841900 | 8.49408900  |
| H | 0.01203800  | -3.21852500 | 10.14903500 |
| C | -0.24170200 | 3.64212200  | 9.04795200  |
| H | 0.55606700  | 3.36542300  | 8.35017200  |
| H | 0.27472500  | 4.01654900  | 9.94761500  |
| C | -1.01439800 | 2.29512000  | 9.47381500  |
| H | -1.81232500 | 2.06696000  | 8.76019900  |

|   |              |             |             |
|---|--------------|-------------|-------------|
| H | -1.53216900  | 2.50022100  | 10.42834500 |
| C | -0.08228100  | 1.06301200  | 9.69583800  |
| H | 0.93711500   | 1.41361300  | 9.90346500  |
| C | -0.14506700  | -0.31055800 | 9.74008200  |
| H | 0.83740500   | -0.73798300 | 9.97848100  |
| C | -1.18458400  | -1.46365200 | 9.58603900  |
| H | -1.71320300  | -1.57620200 | 10.55038500 |
| H | -1.96389900  | -1.20411200 | 8.85935400  |
| C | -10.97776700 | -5.98453500 | 1.98107300  |
| C | -9.76234200  | -5.71966300 | 2.67900900  |
| C | -8.54309200  | -5.87085000 | 1.94810600  |
| C | -8.57178500  | -6.01135600 | 0.51743300  |
| C | -9.81973100  | -5.99422000 | -0.17945000 |
| C | -11.00551800 | -6.11601000 | 0.60381000  |
| C | -7.28078200  | -5.68127800 | 2.60938900  |
| C | -6.05954300  | -5.90439400 | 1.89747600  |
| C | -6.08808100  | -6.05468800 | 0.47167400  |
| C | -7.33794900  | -5.96516000 | -0.21893200 |
| C | -4.80798300  | -5.71440000 | 2.55667800  |
| C | -3.58302500  | -5.89598400 | 1.83729300  |
| C | -3.61043500  | -6.06199400 | 0.42655600  |
| C | -4.86518700  | -6.01998500 | -0.26407100 |
| C | -2.32900000  | -5.65918500 | 2.47629900  |
| C | -1.10390400  | -5.84441600 | 1.77689400  |
| C | -1.13099800  | -6.01202900 | 0.37900300  |
| C | -2.38285800  | -5.98520900 | -0.29834400 |
| C | -4.77504200  | -5.08928500 | 3.84051200  |
| C | -3.51926700  | -4.66089800 | 4.37561100  |
| C | -2.29680700  | -5.04318100 | 3.74898800  |
| C | -5.99238600  | -4.66851400 | 4.45514300  |
| C | -5.95736500  | -3.65809900 | 5.47112800  |
| C | -4.70590400  | -3.09014600 | 5.85574300  |
| C | -3.48420000  | -3.66337300 | 5.38246400  |
| C | -7.24723200  | -5.06284200 | 3.89346700  |
| C | -8.47509800  | -4.64376800 | 4.51296000  |
| C | -8.43997300  | -3.62754500 | 5.52997800  |

|   |              |             |             |
|---|--------------|-------------|-------------|
| C | -7.17754300  | -3.05367800 | 5.90853600  |
| C | -9.72751100  | -5.09388300 | 3.99100600  |
| C | -10.90552300 | -4.69887300 | 4.69114700  |
| C | -10.87170100 | -3.72009200 | 5.66892700  |
| C | -9.65706900  | -3.06163800 | 6.02232000  |
| C | -7.14443900  | -1.77110100 | 6.52973800  |
| C | -8.37439700  | -1.06441100 | 6.76139900  |
| C | -9.62382000  | -1.74986300 | 6.64901000  |
| C | -5.89158200  | -1.10563400 | 6.71501600  |
| C | -4.67205400  | -1.81030600 | 6.48704800  |
| C | -3.41665700  | -1.13860900 | 6.63551600  |
| C | -2.19328700  | -1.82027500 | 6.36318100  |
| C | -2.22814000  | -3.08482600 | 5.73234500  |
| C | -1.00638500  | -3.66377900 | 5.29413000  |
| C | -1.04191700  | -4.65211900 | 4.29087600  |
| C | -0.93802400  | -1.17188800 | 6.52851500  |
| C | 0.28846200   | -1.87143900 | 6.32806800  |
| C | 0.25332500   | -3.13412000 | 5.70298700  |
| C | 1.47502700   | -3.76781900 | 5.32086300  |
| C | 1.43918700   | -4.76345200 | 4.30559600  |
| C | 0.18342400   | -5.08937400 | 3.70801500  |
| C | 0.15168300   | -5.69083800 | 2.43497300  |
| C | 0.09992700   | -5.99028000 | -0.34105800 |
| C | 1.34933300   | -6.09488100 | 0.34033600  |
| C | 1.37580200   | -5.95781100 | 1.75233500  |
| C | 2.62336200   | -5.83794400 | 2.43335100  |
| C | 2.65597200   | -5.23202800 | 3.72826200  |
| C | 3.84544100   | -6.06559900 | 1.72615300  |
| C | 3.81871100   | -6.19776600 | 0.30385900  |
| C | 2.57245500   | -6.09897900 | -0.38937500 |
| C | 2.55384400   | -5.75586800 | -1.77555700 |
| C | 1.31271900   | -5.41228100 | -2.38712500 |
| C | 0.07958000   | -5.66168300 | -1.71036900 |
| C | -1.17089400  | -5.33291400 | -2.31486100 |
| C | -2.40240500  | -5.63878000 | -1.67151100 |
| C | 5.04756400   | -6.16966600 | -0.43334900 |



|   |             |             |             |
|---|-------------|-------------|-------------|
| C | 5.03039900  | -5.81367500 | -1.82078500 |
| C | 3.78471100  | -5.49351800 | -2.45477100 |
| C | 3.77785400  | -4.67878200 | -3.62750100 |
| C | 2.53890400  | -4.13819400 | -4.09879600 |
| C | 1.30548900  | -4.58990800 | -3.54306500 |
| C | 0.06432600  | -4.02647900 | -3.97388500 |
| C | -1.17725500 | -4.48985500 | -3.44396600 |
| C | 0.07206700  | -2.86456400 | -4.76889900 |
| C | 1.31760200  | -2.26242900 | -5.12010600 |
| C | 2.54596100  | -2.95338100 | -4.89975000 |
| C | 3.78915100  | -2.32392800 | -5.22573800 |
| C | 5.02406700  | -3.00125200 | -4.95751700 |
| C | 5.01802000  | -4.18618900 | -4.15216100 |
| C | 6.25419300  | -4.70694700 | -3.66191100 |
| C | 6.26039700  | -5.52878200 | -2.48693400 |
| C | 3.80725600  | -0.93535800 | -5.56242400 |
| C | 2.58214800  | -0.19703500 | -5.55943100 |
| C | 1.33705500  | -0.87806500 | -5.42781800 |
| C | 0.11083400  | -0.14724500 | -5.39680300 |
| C | -1.14215000 | -0.81692400 | -5.32402100 |
| C | -1.16112100 | -2.19183100 | -5.01309100 |
| C | -2.40645700 | -2.81482400 | -4.72635300 |
| C | -2.41356200 | -3.97126700 | -3.91220000 |
| C | 0.13881800  | 1.25299900  | -5.26788300 |
| C | 1.39489000  | 1.91918500  | -5.15303300 |
| C | 2.61207000  | 1.22459700  | -5.41784700 |
| C | 3.86472900  | 1.89965100  | -5.27537700 |
| C | 5.08739400  | 1.18629100  | -5.49913300 |
| C | 5.05850400  | -0.23916300 | -5.64361300 |
| C | 6.28285100  | -0.97301200 | -5.61189900 |
| C | 6.26521800  | -2.36427400 | -5.26337700 |
| C | 3.89961800  | 3.19131300  | -4.66580800 |
| C | 2.68286000  | 3.78548000  | -4.20671900 |
| C | 1.43035600  | 3.19687900  | -4.54127100 |
| C | 0.20878800  | 3.77718500  | -4.08889500 |
| C | -1.04959400 | 3.22349500  | -4.46113800 |

|   |             |             |             |
|---|-------------|-------------|-------------|
| C | -1.08470700 | 1.95354300  | -5.06729500 |
| C | -2.33898000 | 1.31304500  | -5.26314400 |
| C | -2.36731100 | -0.09511000 | -5.37360800 |
| C | 0.24505700  | 4.80167200  | -3.12609000 |
| C | 1.50392900  | 5.21928900  | -2.59637900 |
| C | 2.72071200  | 4.81320400  | -3.21709800 |
| C | 3.97707700  | 5.22087000  | -2.66980200 |
| C | 5.19707600  | 4.78195400  | -3.28157700 |
| C | 5.15824300  | 3.76327100  | -4.28830100 |
| C | 6.37429300  | 3.15100500  | -4.71943500 |
| C | 6.33873000  | 1.85315400  | -5.32942100 |
| C | 4.01251700  | 5.83009000  | -1.37892400 |
| C | 2.79057800  | 6.01976200  | -0.65887600 |
| C | 1.53903700  | 5.80871000  | -1.30781800 |
| C | 0.31209000  | 5.96231200  | -0.59253600 |
| C | -0.94570300 | 5.78634700  | -1.24116400 |
| C | -0.98041800 | 5.21970900  | -2.52978900 |
| C | -2.23523100 | 4.85929100  | -3.09605200 |
| C | -2.27130200 | 3.84472500  | -4.08041800 |
| C | 0.34253900  | 6.09682000  | 0.80816500  |
| C | 1.59702000  | 6.05354500  | 1.48996000  |
| C | 2.82059900  | 6.14071000  | 0.76524000  |
| C | 4.07006000  | 6.06484500  | 1.45812300  |
| C | 5.29809600  | 6.10908900  | 0.71967200  |
| C | 5.26900600  | 5.99137500  | -0.70792800 |
| C | 6.48770500  | 5.77251300  | -1.41942700 |
| C | 6.45161900  | 5.16400500  | -2.71755000 |
| C | 4.08840900  | 5.68563600  | 2.83536700  |
| C | 2.85683600  | 5.38572000  | 3.49886600  |
| C | 1.61518000  | 5.66944100  | 2.85764200  |
| C | 0.37844100  | 5.34613300  | 3.49535500  |
| C | -0.86975500 | 5.66877100  | 2.88720300  |
| C | -0.88690200 | 6.04139700  | 1.52740100  |
| C | -2.13832000 | 6.14309100  | 0.85612600  |
| C | -2.16721700 | 6.00111400  | -0.54951600 |
| C | 5.33385600  | 5.35744500  | 3.46442300  |

|   |             |             |            |
|---|-------------|-------------|------------|
| C | 6.56303400  | 5.63269300  | 2.79191500 |
| C | 6.54489200  | 6.01057000  | 1.40862600 |
| C | -2.10219600 | 5.41880600  | 3.55496600 |
| C | 0.38321000  | 4.53340100  | 4.64570000 |
| C | 1.62522500  | 4.04919700  | 5.15856400 |
| C | 2.86177700  | 4.56192500  | 4.66675100 |
| C | 4.09940500  | 4.04418100  | 5.16472800 |
| C | 5.33928700  | 4.53182800  | 4.63524300 |
| C | 4.09176000  | 2.87519400  | 5.98568900 |
| C | 2.84689700  | 2.24347300  | 6.30275700 |
| C | 1.61769100  | 2.89138400  | 5.98205600 |
| C | 0.36797300  | 2.25613600  | 6.26151000 |
| C | -0.86810200 | 2.90838100  | 5.97196000 |
| C | -0.85955600 | 4.06029300  | 5.15974700 |
| C | -2.09734100 | 4.60147100  | 4.71044200 |
| C | 2.82610700  | 0.86195400  | 6.67324600 |
| C | 1.57690400  | 0.17581900  | 6.71780700 |
| C | 0.34840300  | 0.90019700  | 6.64023000 |
| C | -0.90825500 | 0.22643700  | 6.69818200 |
| C | -2.13512500 | 0.94588600  | 6.68184700 |
| C | -2.11506600 | 2.31293300  | 6.31030600 |
| C | -3.34503300 | 2.99973000  | 6.08103700 |
| C | -3.33634500 | 4.16433900  | 5.26891300 |
| C | -4.57419300 | 4.72223200  | 4.81309300 |
| C | 6.57425700  | 3.99740600  | 5.11273600 |
| C | 6.56665700  | 2.82128100  | 5.93271500 |
| C | 5.32477400  | 2.19974600  | 6.26523900 |
| C | 5.30439300  | 0.81448300  | 6.62997300 |
| C | 4.05153900  | 0.12252100  | 6.71409200 |
| C | 4.02063200  | -1.29876000 | 6.57213200 |
| C | 2.76437300  | -1.95943700 | 6.38556700 |
| C | 1.54641300  | -1.23746200 | 6.56677900 |
| C | -3.38733700 | 0.27068700  | 6.79717900 |
| C | -4.61446200 | 1.00862400  | 6.79162800 |
| C | -4.59294100 | 2.39116100  | 6.43266400 |
| C | -5.82012000 | 3.06812300  | 6.16134800 |

|   |             |             |             |
|---|-------------|-------------|-------------|
| C | -5.81078200 | 4.24624400  | 5.34456900  |
| C | 7.81247600  | 4.47433400  | 4.57747900  |
| C | 9.05838200  | 3.95554300  | 5.07175900  |
| C | 9.05082800  | 2.77566000  | 5.89195200  |
| C | 7.79766000  | 2.14283000  | 6.19973600  |
| C | 7.77752200  | 0.76523900  | 6.56092900  |
| C | 6.52669100  | 0.07673500  | 6.65323600  |
| C | 6.49582600  | -1.34979800 | 6.51402900  |
| C | 5.24300300  | -2.01531300 | 6.35140700  |
| C | 2.72835500  | -3.24415200 | 5.75668700  |
| C | 3.94734900  | -3.86123800 | 5.32794000  |
| C | 5.20636200  | -3.30472100 | 5.72804200  |
| C | 9.01071800  | 0.02894300  | 6.61147300  |
| C | 8.97989200  | -1.40103700 | 6.47410700  |
| C | 7.71671100  | -2.06077400 | 6.28759100  |
| C | 7.68031900  | -3.34442400 | 5.67152400  |
| C | 6.42304900  | -3.90665800 | 5.28386100  |
| C | 6.38606100  | -4.91174200 | 4.26204200  |
| C | 5.13263600  | -5.29892500 | 3.69860900  |
| C | 3.91093800  | -4.86174600 | 4.30842500  |
| C | -5.86237300 | 0.31936100  | 6.86640600  |
| C | 7.80683700  | 5.29481700  | 3.41298800  |
| C | -4.57929600 | 5.54497100  | 3.64469500  |
| C | -3.34585900 | 5.79356600  | 2.96122000  |
| C | -3.36420800 | 6.15882300  | 1.58906600  |
| C | 9.04716100  | 5.59152000  | 2.74996600  |
| C | 9.02894000  | 5.96767300  | 1.36309400  |
| C | 7.77093500  | 6.04021800  | 0.67181100  |
| C | 7.74212300  | 5.91973300  | -0.74736400 |
| C | -5.81998900 | 5.87919900  | 3.02206000  |
| C | -5.83793900 | 6.24713300  | 1.63643400  |
| C | -4.61493000 | 6.27350700  | 0.90198500  |
| C | -4.64259400 | 6.13853800  | -0.52065000 |
| C | -3.42145500 | 5.88628800  | -1.22028600 |
| C | -3.45597000 | 5.31095600  | -2.51487500 |
| C | 8.97165600  | 5.72532300  | -1.46606700 |

|   |             |             |             |
|---|-------------|-------------|-------------|
| C | 8.93518600  | 5.11816700  | -2.76813600 |
| C | 7.67005600  | 4.71791500  | -3.32036900 |
| C | 7.63137900  | 3.70934200  | -4.32615200 |
| C | -5.89326500 | 5.99285200  | -1.19257200 |
| C | -5.92877600 | 5.39272600  | -2.49415100 |
| C | -4.71279500 | 4.95608600  | -3.09951900 |
| C | -4.74882200 | 3.94962400  | -4.11341000 |
| C | -3.52621500 | 3.32200500  | -4.51495800 |
| C | -3.56085200 | 2.03440900  | -5.11362500 |
| C | 8.85801600  | 3.11104900  | -4.77739400 |
| C | 8.82219700  | 1.81177000  | -5.39098600 |
| C | 7.56054800  | 1.13876400  | -5.53789800 |
| C | 7.53244300  | -0.27893400 | -5.67855800 |
| C | -6.00227700 | 3.39106900  | -4.50684500 |
| C | -6.03703500 | 2.09144000  | -5.11164500 |
| C | -4.81703100 | 1.37701400  | -5.31182100 |
| C | -4.84588900 | -0.04687900 | -5.43887400 |
| C | -3.61845500 | -0.78009400 | -5.36591300 |
| C | -3.63882600 | -2.15939900 | -5.02978900 |
| C | 8.76673900  | -1.01549700 | -5.66786300 |
| C | 8.74941300  | -2.40797100 | -5.31274000 |
| C | 7.49818500  | -3.03285800 | -4.98112600 |
| C | 7.49255900  | -4.20781800 | -4.17578800 |
| C | -6.09386700 | -0.73733100 | -5.37582700 |
| C | -6.11393000 | -2.12696300 | -5.02155000 |
| C | -4.88638400 | -2.80019600 | -4.74429800 |
| C | -4.89282600 | -3.97887200 | -3.93551000 |
| C | -3.65407900 | -4.48455100 | -3.42886600 |
| C | -3.64857000 | -5.33537900 | -2.29577500 |
| C | 8.73841500  | -4.74714200 | -3.70352300 |
| C | 8.74435500  | -5.57271900 | -2.52738800 |
| C | 7.50431300  | -5.83810500 | -1.85105400 |
| C | 7.52098300  | -6.19852800 | -0.47294900 |
| C | 6.29343900  | -6.24322000 | 0.26027600  |
| C | 6.31983200  | -6.10940400 | 1.68792700  |
| C | 5.09961400  | -5.90410300 | 2.40033500  |

|   |             |             |             |
|---|-------------|-------------|-------------|
| C | -6.12895100 | -4.47988600 | -3.42956000 |
| C | -6.12416100 | -5.32173000 | -2.26879200 |
| C | -4.88379600 | -5.65018100 | -1.64409900 |
| C | 8.77721800  | -6.29706700 | 0.21848300  |
| C | 8.80357300  | -6.16695900 | 1.64955000  |
| C | 7.57307100  | -5.93784500 | 2.35631000  |
| C | 7.60629900  | -5.33765000 | 3.64789200  |
| C | 8.86992700  | -4.97100600 | 4.22607400  |
| C | 8.90733600  | -3.96252000 | 5.24914800  |
| C | 10.25953800 | 0.72412000  | 6.59939100  |
| C | 10.28004500 | 2.12991300  | 6.23128700  |
| C | 10.19809700 | -2.13384700 | 6.32637300  |
| C | 10.16087100 | -3.44515100 | 5.70101000  |
| C | 10.28951100 | 5.32567000  | 3.40498000  |
| C | 10.29525900 | 4.48842800  | 4.59300000  |
| C | 10.15090400 | 4.73952400  | -3.41756200 |
| C | 10.11125300 | 3.71421100  | -4.44708000 |
| C | 10.22380600 | 5.95127300  | -0.81471600 |
| C | 10.25306900 | 6.07582700  | 0.63311300  |
| C | 10.05221100 | -6.07281500 | 2.33890900  |
| C | 10.08606200 | -5.46172900 | 3.65720500  |
| C | 9.99973900  | -6.32895000 | -0.52152700 |
| C | 9.98318200  | -5.95623500 | -1.92630300 |
| C | 9.97682100  | -3.10940200 | -5.10131100 |
| C | 9.97141200  | -4.30574700 | -4.27592300 |
| C | 10.01131100 | -0.32806400 | -5.81521700 |
| C | 10.03959300 | 1.11838100  | -5.67483300 |
| C | -7.08753000 | 1.05625100  | 6.82431900  |
| C | -7.06621500 | 2.43698500  | 6.47224200  |
| C | -7.35598700 | -5.59702900 | -1.59558200 |
| C | -7.31922000 | 0.00084000  | -5.40459600 |
| C | -7.29054800 | 1.42008800  | -5.27130400 |
| C | -7.35830200 | -2.75637000 | -4.70171000 |
| C | -7.36558500 | -3.93783000 | -3.90398900 |
| C | -7.04753900 | 4.77550500  | 4.85678000  |
| C | -7.05224400 | 5.59487900  | 3.69065700  |

|   |             |             |             |
|---|-------------|-------------|-------------|
| C | -7.11474600 | 6.20010100  | -0.47690600 |
| C | -7.08700600 | 6.32628400  | 0.94276200  |
| C | -7.18487200 | 5.00114400  | -3.05564600 |
| C | -7.22174700 | 3.99538300  | -4.06506900 |
| C | 11.33747000 | -4.14722700 | 5.30495000  |
| C | 11.30132700 | -5.11881000 | 4.32038400  |
| C | 11.41434500 | -1.43783100 | 6.59263400  |
| C | 11.44404300 | -0.06068700 | 6.72392700  |
| C | 11.23146800 | -6.37913700 | 1.59729900  |
| C | 11.20622600 | -6.50188700 | 0.21923400  |
| C | 11.49373700 | 3.97882500  | 5.17477300  |
| C | 11.48647800 | 2.84233100  | 5.96413100  |
| C | 11.46433600 | 6.06888800  | 1.38619900  |
| C | 11.48191400 | 5.70772500  | 2.72188300  |
| C | 11.40396500 | 5.81033200  | -1.60313400 |
| C | 11.36874000 | 5.22663300  | -2.85731900 |
| C | 11.17220800 | -5.72681800 | -2.68003400 |
| C | 11.16654600 | -4.93128200 | -3.81229900 |
| C | 11.17760000 | -2.46372700 | -5.52013700 |
| C | 11.19408300 | -1.12366000 | -5.86472800 |
| C | 11.25220600 | 1.86289700  | -5.57826000 |
| C | 11.28677700 | 3.11330600  | -4.98653500 |
| C | -8.48569100 | 3.43975100  | -4.46525800 |
| C | -8.52060700 | 2.13831600  | -5.07605000 |
| C | -8.41154400 | 5.44747300  | -2.45395500 |
| C | -8.37620200 | 6.05540100  | -1.15106100 |
| C | -8.57731800 | -0.69231100 | -5.34416300 |
| C | -8.59705200 | -2.08592300 | -4.98910500 |
| C | -8.30297100 | 5.93722200  | 3.06964400  |
| C | -8.32050400 | 6.30712100  | 1.68025200  |
| C | -8.30388300 | 3.11923400  | 6.20974100  |
| C | -8.29436200 | 4.30295400  | 5.39409700  |
| C | -8.34549700 | 0.36548500  | 6.90937900  |
| C | -8.61261800 | -4.43997100 | -3.39521600 |
| C | -8.60763200 | -5.27778500 | -2.22650800 |
| C | -9.56641500 | 1.10798000  | 6.94195800  |

|   |              |             |             |
|---|--------------|-------------|-------------|
| C | -9.54483200  | 2.51731700  | 6.58569900  |
| C | -9.83801600  | -5.61851800 | -1.58381300 |
| C | -9.80113700  | 0.03974500  | -5.44458700 |
| C | -9.77218200  | 1.48690900  | -5.30656400 |
| C | -9.84021100  | -2.74475800 | -4.73596200 |
| C | -9.84812600  | -3.94800900 | -3.91984100 |
| C | -9.52587700  | 4.88321000  | 4.95813500  |
| C | -9.53029300  | 5.71983300  | 3.76928100  |
| C | -9.59375900  | 6.33014800  | -0.45399000 |
| C | -9.56517400  | 6.45948100  | 0.99385200  |
| C | -9.66445900  | 5.11359800  | -3.05582600 |
| C | -9.70248600  | 4.08620600  | -4.08387400 |
| C | -10.91956200 | 3.52503100  | -4.57169300 |
| C | -10.95311400 | 2.27337100  | -5.16095900 |
| C | -10.84101800 | 5.64640700  | -2.45058600 |
| C | -10.80706800 | 6.23285000  | -1.19765200 |
| C | -11.01270300 | -0.71304100 | -5.44840900 |
| C | -11.03158900 | -2.05403700 | -5.10737800 |
| C | -10.73102700 | 6.14521800  | 3.12741100  |
| C | -10.74770600 | 6.50141800  | 1.79038300  |
| C | -10.73135300 | 3.27711300  | 6.36380100  |
| C | -10.72212400 | 4.41736300  | 5.57988300  |
| C | -10.77566700 | 0.36766600  | 7.09658900  |
| C | -10.80323700 | -1.00877200 | 6.95568800  |
| C | -11.04824000 | -4.53473100 | -3.41939200 |
| C | -11.04345300 | -5.33940000 | -2.29362900 |
| H | 12.31052500  | 5.05721100  | -3.37670900 |
| H | 12.37205300  | 6.07804400  | -1.18295100 |
| H | 12.25289200  | 3.59770900  | -4.85462000 |
| H | 12.41360600  | 6.25945800  | 0.88817200  |
| H | 12.12375000  | -3.00118800 | -5.48263800 |
| H | 12.15265100  | -0.65710600 | -6.08581000 |
| H | 12.11704600  | -4.70961000 | -4.29485700 |
| H | 12.19240200  | 1.41071600  | -5.88966300 |
| H | 12.19366700  | -6.42835400 | 2.10435700  |
| H | 12.14951500  | -6.64268000 | -0.30594600 |



|   |              |             |             |
|---|--------------|-------------|-------------|
| H | 12.24157500  | -5.55777000 | 3.99084100  |
| H | 12.12688700  | -6.10142600 | -2.31436100 |
| H | 12.44429600  | 5.62780800  | 3.22470800  |
| H | 12.45250900  | 4.42977800  | 4.92419800  |
| H | 12.41038100  | 0.42925700  | 6.83131900  |
| H | 12.35847500  | -1.97997100 | 6.60179600  |
| H | 12.43968100  | 2.44143900  | 6.30489300  |
| H | 12.30463500  | -3.85786000 | 5.71269500  |
| H | -11.76730800 | -1.51343400 | 6.99045700  |
| H | -11.71904100 | 0.89297700  | 7.23601900  |
| H | -11.81332800 | -3.39263400 | 6.10648100  |
| H | -11.68706500 | 2.91127600  | 6.73553800  |
| H | -11.97157800 | -6.22016200 | 0.11252700  |
| H | -11.92304200 | -5.99145300 | 2.52123300  |
| H | -11.99796100 | -5.68152100 | -1.89687900 |
| H | -11.87247800 | -5.10349900 | 4.39680300  |
| H | -11.96172500 | -0.21217900 | -5.63253900 |
| H | -11.99465600 | -2.55686300 | -5.03583300 |
| H | -11.92092800 | 1.85364600  | -5.43028900 |
| H | -12.00642600 | -4.27474700 | -3.86629300 |
| H | -11.67105300 | 4.90559500  | 5.36415800  |
| H | -11.67720400 | 6.10344500  | 3.66443100  |
| H | -11.74803500 | 6.53769700  | -0.74260900 |
| H | -11.80757200 | 5.51245100  | -2.93359300 |
| H | -11.70643700 | 6.72678400  | 1.32619900  |
| H | -11.86225600 | 4.04196600  | -4.39974000 |

**(9,9)@Cycle-10**

|   |            |             |             |
|---|------------|-------------|-------------|
| C | 1.06809100 | -0.47973600 | -8.79897500 |
| C | 3.40985100 | -0.68724500 | -8.63097800 |
| C | 1.16529400 | 0.94526700  | -8.76573300 |
| H | 0.05714900 | -0.88834400 | -8.85406300 |
| C | 3.50910700 | 0.73903000  | -8.59513300 |
| H | 4.34310700 | -1.24607600 | -8.55348400 |
| H | 0.23014200 | 1.50401400  | -8.80718600 |
| H | 4.51571900 | 1.14678800  | -8.48634300 |

|   |             |             |             |
|---|-------------|-------------|-------------|
| C | 1.86584500  | 8.77554300  | -2.90281400 |
| C | 4.19994400  | 9.18825400  | -3.76939800 |
| C | 3.00020100  | 8.49856900  | -3.88032300 |
| C | 2.73506400  | 7.55641000  | -5.05575800 |
| C | 3.72852100  | 6.81622300  | -5.75417400 |
| C | 1.14208100  | 6.23177900  | -6.43292500 |
| C | 3.47693900  | 5.81117900  | -6.71943700 |
| H | 4.77154800  | 6.92116700  | -5.47192300 |
| H | 0.11029300  | 5.95159700  | -6.62961900 |
| H | 4.33419200  | 5.27138100  | -7.11938100 |
| C | 2.39221900  | 1.62763900  | -8.55733800 |
| C | 2.16159400  | 5.40466200  | -7.01755700 |
| C | 2.70766100  | 3.23246900  | -8.38760500 |
| H | 2.84065300  | 3.63327100  | -9.40352000 |
| H | 3.66829500  | 3.27217400  | -7.86007100 |
| O | 1.76077500  | 4.21347400  | -7.70827200 |
| C | 1.39499300  | 7.29886800  | -5.49533100 |
| C | 0.35331100  | 8.20822000  | -4.90020600 |
| C | -0.66289300 | 8.71392600  | -5.69634000 |
| S | -0.94245000 | 8.22191900  | -7.40498200 |
| S | -1.77388200 | 10.04813600 | -5.21804400 |
| C | -2.07810800 | 9.50201600  | -7.80463700 |
| H | -2.43538600 | 9.54766000  | -8.83147100 |
| C | -2.45538700 | 10.33045600 | -6.81268400 |
| H | -3.16657200 | 11.14810400 | -6.91174500 |
| S | 5.51970600  | 9.17189800  | -4.99561200 |
| C | 6.06320500  | 10.97966900 | -3.12400400 |
| H | 6.57056400  | 11.76424700 | -2.56629800 |
| S | 4.58535100  | 10.33187300 | -2.43344900 |
| C | 6.48815400  | 10.45278700 | -4.28761800 |
| H | 7.39338200  | 10.74229100 | -4.81748500 |
| C | 0.87100100  | 9.33640100  | -0.60176400 |
| C | 0.56103700  | 8.69087100  | -3.48128900 |
| C | -0.51489300 | 9.04709400  | -2.62604300 |
| H | -1.53610000 | 8.94670600  | -2.98515800 |
| C | -0.37706700 | 9.38576400  | -1.27443300 |

|   |             |              |             |
|---|-------------|--------------|-------------|
| H | -1.27382600 | 9.57221800   | -0.68539600 |
| C | 1.99209300  | 9.08046800   | -1.47148400 |
| H | 2.97602600  | 8.97920700   | -1.01936200 |
| O | 0.66813500  | 9.49086000   | 0.81578100  |
| C | 1.70344300  | -9.28593100  | -0.75425000 |
| C | 2.77680200  | -8.55395800  | -3.41707000 |
| C | 0.87095600  | -9.01115200  | -1.90223800 |
| H | -0.19748400 | -8.94965700  | -1.71163900 |
| C | 3.08300700  | -9.31158000  | -1.03293900 |
| H | 3.80541200  | -9.51001400  | -0.24175300 |
| C | 3.57565700  | -8.93531700  | -2.30708400 |
| H | 4.65547500  | -8.83187300  | -2.37206100 |
| C | 1.35979300  | -8.65817300  | -3.21504400 |
| C | 0.51063400  | -8.36397200  | -4.43614500 |
| C | 3.32652200  | -8.03336800  | -4.73488800 |
| C | 2.44859600  | -7.11638800  | -5.56029700 |
| C | 1.03857400  | -7.36362900  | -5.45267700 |
| C | 2.90662600  | -6.04366000  | -6.41032300 |
| H | 3.95853500  | -5.77250000  | -6.38151200 |
| C | 0.22539400  | -6.58630500  | -6.31794300 |
| H | -0.85518100 | -6.68236900  | -6.26082500 |
| C | 0.69118300  | -5.56152200  | -7.17808800 |
| H | -0.05267400 | -4.99254600  | -7.73446000 |
| C | 2.04581700  | -5.18487800  | -7.18284900 |
| O | 2.60565900  | -3.99796000  | -7.76024700 |
| C | 2.16683800  | -1.37425800  | -8.63282600 |
| C | 1.81644100  | -2.97835000  | -8.57342400 |
| C | 4.52826300  | -8.49509000  | -5.24797300 |
| C | -0.64348000 | -9.09459300  | -4.67601900 |
| S | 5.21202300  | -7.98572800  | -6.83355900 |
| S | 5.54105700  | -9.77716700  | -4.49206100 |
| S | -1.29429900 | -10.34761800 | -3.55902600 |
| S | -1.60972900 | -9.02336900  | -6.19371800 |
| C | 6.62453600  | -10.01730700 | -5.85397500 |
| H | 7.37578900  | -10.79889800 | -5.76020400 |
| C | 6.47442900  | -9.20425000  | -6.91645800 |

|   |             |              |             |
|---|-------------|--------------|-------------|
| H | 7.08532400  | -9.22700900  | -7.81667600 |
| C | -2.63245900 | -10.41146700 | -5.85838700 |
| H | -3.34558600 | -10.70124200 | -6.62747400 |
| C | -2.48811400 | -11.01213000 | -4.66231800 |
| H | -3.06642100 | -11.86541500 | -4.31364500 |
| H | 1.87004800  | -3.35209400  | -9.60665000 |
| H | 0.77458500  | -3.01681300  | -8.23319000 |
| O | 1.08625800  | -9.42229400  | 0.51951500  |
| C | 1.81362000  | -9.51308400  | 1.87781700  |
| H | 2.65532600  | -8.81427800  | 1.85835700  |
| H | 2.20749000  | -10.53779000 | 1.92961900  |
| C | 0.84795900  | -9.24964100  | 3.19840000  |
| H | 0.34474600  | -10.20778900 | 3.39473100  |
| H | 0.06432000  | -8.55902400  | 2.88411700  |
| C | 1.48826700  | -8.73482600  | 4.65883000  |
| H | 1.98860100  | -9.61281100  | 5.09612900  |
| H | 2.28179500  | -8.01529000  | 4.45406800  |
| C | 0.52147500  | -8.10114700  | 5.86785400  |
| H | 0.02229300  | -8.95865200  | 6.34540600  |
| H | -0.27812200 | -7.51908700  | 5.40134500  |
| C | 1.19317000  | -7.20436300  | 7.12282700  |
| H | 1.61947700  | -7.94395200  | 7.81844700  |
| H | 2.04717400  | -6.64354800  | 6.73339300  |
| C | 0.25995000  | -6.17126900  | 8.05617300  |
| H | -0.28695200 | -6.81471300  | 8.76297700  |
| H | -0.50348700 | -5.72997700  | 7.41235100  |
| C | 0.94187600  | -4.94860100  | 8.98192400  |
| H | 1.37662600  | -5.44292300  | 9.86478800  |
| H | 1.78890600  | -4.52774900  | 8.43791700  |
| C | 1.49234000  | 9.41172600   | 2.10602400  |
| H | 2.24684200  | 8.63571000   | 1.99935300  |
| H | 1.99586900  | 10.38455500  | 2.19568500  |
| C | 0.57184900  | 9.17341400   | 3.47316900  |
| H | 0.12938500  | 10.15304500  | 3.70603700  |
| H | -0.26162400 | 8.52787400   | 3.18946700  |
| C | 1.25532200  | 8.61517000   | 4.90934000  |

|   |              |             |             |
|---|--------------|-------------|-------------|
| H | 1.70757800   | 9.50219100  | 5.37825600  |
| H | 2.09257200   | 7.95488200  | 4.66971900  |
| C | 0.32461900   | 7.89343800  | 6.11535100  |
| H | -0.14920300  | 8.72527100  | 6.65926800  |
| H | -0.49387600  | 7.34574200  | 5.64136800  |
| C | 1.02400000   | 6.90790900  | 7.27860000  |
| H | 1.56369400   | 7.58199300  | 7.96239200  |
| H | 1.79465500   | 6.30858400  | 6.79490400  |
| C | 0.11683000   | 5.88884900  | 8.25113200  |
| H | -0.37046900  | 6.53041000  | 9.00183200  |
| H | -0.69568100  | 5.47043700  | 7.65071300  |
| C | 0.84518200   | 4.64170800  | 9.12523800  |
| H | 1.25443900   | 5.12113700  | 10.02773800 |
| H | 1.71623800   | 4.28823900  | 8.56802500  |
| C | -0.02748600  | 3.31446500  | 9.67829800  |
| H | -0.82880500  | 3.10349400  | 8.96684800  |
| H | -0.53027800  | 3.65494100  | 10.59663300 |
| C | 0.01873600   | -3.68523500 | 9.56495600  |
| H | -0.75617300  | -3.45416800 | 8.82979800  |
| H | -0.51970700  | -4.07819500 | 10.44141000 |
| C | 0.70823900   | -2.22923600 | 10.10542900 |
| H | 1.65414200   | -2.04053800 | 9.59021900  |
| H | 0.98455500   | -2.43867800 | 11.15352600 |
| C | -0.20697400  | -0.89529700 | 10.19628700 |
| H | -1.23054900  | -1.24548000 | 10.38248300 |
| C | -0.21239900  | 0.50796000  | 10.21437800 |
| H | -1.23894200  | 0.84652100  | 10.40453800 |
| C | 0.69919300   | 1.84241900  | 10.10265600 |
| H | 1.09479000   | 2.01036000  | 11.11926300 |
| H | 1.57858900   | 1.66433100  | 9.48136000  |
| C | -11.65839200 | 6.76017700  | 1.36834200  |
| C | -10.52177300 | 6.44294000  | 2.16799800  |
| C | -9.23453800  | 6.58787300  | 1.56324000  |
| C | -9.12114000  | 6.80061500  | 0.14642300  |
| C | -10.29502400 | 6.86790100  | -0.66649800 |
| C | -11.54915900 | 6.96456500  | 0.00410600  |

|   |              |            |             |
|---|--------------|------------|-------------|
| C | -8.04648400  | 6.35375200 | 2.33733200  |
| C | -6.75796700  | 6.57789800 | 1.75780300  |
| C | -6.64482400  | 6.79002600 | 0.34423900  |
| C | -7.82205400  | 6.77531400 | -0.46791900 |
| C | -5.58036800  | 6.37368400 | 2.53921100  |
| C | -4.29019000  | 6.59208200 | 1.95476200  |
| C | -4.17721300  | 6.80353700 | 0.54594100  |
| C | -5.35553200  | 6.79500100 | -0.27012000 |
| C | -3.11030600  | 6.35903000 | 2.73003000  |
| C | -1.82392200  | 6.52158300 | 2.13587500  |
| C | -1.71149600  | 6.73729600 | 0.73776500  |
| C | -2.88601100  | 6.77945300 | -0.07012400 |
| C | -5.68212300  | 5.73728400 | 3.81865200  |
| C | -4.49251300  | 5.32181900 | 4.50200600  |
| C | -3.21113300  | 5.71941400 | 4.00390000  |
| C | -6.96021100  | 5.31707900 | 4.29743100  |
| C | -7.04155900  | 4.31957200 | 5.32405000  |
| C | -5.84398600  | 3.75558800 | 5.86007900  |
| C | -4.57349100  | 4.32862000 | 5.52563300  |
| C | -8.14796900  | 5.72208400 | 3.61053800  |
| C | -9.43736000  | 5.32535900 | 4.10608100  |
| C | -9.51901300  | 4.32393900 | 5.13366400  |
| C | -8.30964200  | 3.74086300 | 5.64656600  |
| C | -10.62532000 | 5.79761100 | 3.46625700  |
| C | -11.87240800 | 5.42636300 | 4.04854200  |
| C | -11.95111000 | 4.46135900 | 5.03708900  |
| C | -10.78866100 | 3.79286700 | 5.52067400  |
| C | -8.36177400  | 2.48298200 | 6.31362900  |
| C | -9.62275500  | 1.80949600 | 6.46211300  |
| C | -10.84165400 | 2.50765600 | 6.19736000  |
| C | -7.14603200  | 1.81218800 | 6.65792700  |
| C | -5.89681100  | 2.49303600 | 6.53492000  |
| C | -4.67946700  | 1.81656100 | 6.87407300  |
| C | -3.42537400  | 2.48835200 | 6.71895200  |
| C | -3.37239100  | 3.74417100 | 6.03994000  |
| C | -2.10314100  | 4.27225000 | 5.66130500  |

|   |             |            |             |
|---|-------------|------------|-------------|
| C | -2.02310000 | 5.25901400 | 4.64523300  |
| C | -2.20839000 | 1.80156100 | 7.00362900  |
| C | -0.94796300 | 2.43054600 | 6.78081000  |
| C | -0.89545700 | 3.65860200 | 6.10995200  |
| C | 0.38308900  | 4.17980400 | 5.75497900  |
| C | 0.46134100  | 5.14843200 | 4.75168000  |
| C | -0.73852400 | 5.58843600 | 4.12003800  |
| C | -0.64019000 | 6.22090000 | 2.87345300  |
| C | -0.42253600 | 6.64047400 | 0.13874600  |
| C | 0.76169300  | 6.61194000 | 0.92637700  |
| C | 0.65450600  | 6.38547600 | 2.30072700  |
| C | 1.84093100  | 6.18487200 | 3.05138500  |
| C | 1.74293000  | 5.55299000 | 4.29827400  |
| C | 3.13025000  | 6.46409800 | 2.51637100  |
| C | 3.23927900  | 6.68818800 | 1.12991100  |
| C | 2.05523400  | 6.61282400 | 0.34241700  |
| C | 2.16360100  | 6.37584800 | -1.03160300 |
| C | 0.97683100  | 6.14973400 | -1.77980400 |
| C | -0.31240900 | 6.39785900 | -1.23743400 |
| C | -1.49138300 | 6.25163000 | -2.02713800 |
| C | -2.77339900 | 6.53699100 | -1.47448400 |
| C | 4.53037600  | 6.77359500 | 0.52749600  |
| C | 4.63998500  | 6.54223800 | -0.86991100 |
| C | 3.45662900  | 6.23507300 | -1.60824700 |
| C | 3.55828500  | 5.57710400 | -2.84362000 |
| C | 2.36410100  | 5.12851100 | -3.47667900 |
| C | 1.07848400  | 5.53374800 | -3.03059800 |
| C | -0.10957100 | 5.16537200 | -3.72091300 |
| C | -1.38758400 | 5.63222900 | -3.29754200 |
| C | -0.02860400 | 4.16152900 | -4.70206400 |
| C | 1.23747400  | 3.56007300 | -4.94208700 |
| C | 2.44243700  | 4.11964300 | -4.44173500 |
| C | 3.71823600  | 3.58416500 | -4.77845300 |
| C | 4.92425100  | 4.19484500 | -4.32484100 |
| C | 4.84291700  | 5.21296800 | -3.34111800 |
| C | 6.02953300  | 5.68456400 | -2.70934600 |

|   |             |             |             |
|---|-------------|-------------|-------------|
| C | 5.92758700  | 6.35890500  | -1.45402200 |
| C | 3.77083100  | 2.33485500  | -5.41462800 |
| C | 2.54399800  | 1.65328400  | -5.65833600 |
| C | 1.29056300  | 2.31173300  | -5.57063700 |
| C | 0.07458400  | 1.66260000  | -5.92201600 |
| C | -1.17150400 | 2.35804500  | -5.89961100 |
| C | -1.22327700 | 3.63561000  | -5.27957400 |
| C | -2.48707000 | 4.24117900  | -5.00761600 |
| C | -2.57018300 | 5.25500200  | -4.00234000 |
| C | 0.09007300  | 0.26783400  | -6.08375800 |
| C | 1.32656800  | -0.42134700 | -5.92313600 |
| C | 2.56232200  | 0.26505800  | -5.82511500 |
| C | 3.80795600  | -0.42407700 | -5.78279200 |
| C | 5.04960600  | 0.28026500  | -5.78227200 |
| C | 5.03058300  | 1.68572000  | -5.58979400 |
| C | 6.24769600  | 2.37925200  | -5.32395200 |
| C | 6.19257700  | 3.65509500  | -4.68217400 |
| C | 3.79806100  | -1.81339700 | -5.59579600 |
| C | 2.54069800  | -2.45825900 | -5.42870600 |
| C | 1.31750600  | -1.80812300 | -5.73452500 |
| C | 0.06770000  | -2.48894000 | -5.67262200 |
| C | -1.14692500 | -1.84443400 | -6.05870200 |
| C | -1.13293700 | -0.43960700 | -6.27854200 |
| C | -2.36086800 | 0.26840000  | -6.44282000 |
| C | -2.38081200 | 1.68648600  | -6.25027700 |
| C | 0.01808800  | -3.71915200 | -4.99588700 |
| C | 1.22313700  | -4.23683100 | -4.44152600 |
| C | 2.49171200  | -3.68405100 | -4.75591500 |
| C | 3.70500700  | -4.26342600 | -4.28912900 |
| C | 4.97741000  | -3.75327100 | -4.68679100 |
| C | 5.02540300  | -2.50019500 | -5.35095100 |
| C | 6.27553700  | -1.83636900 | -5.51657700 |
| C | 6.28746400  | -0.42404700 | -5.74069900 |
| C | 3.62968700  | -5.24475400 | -3.28969800 |
| C | 2.34602100  | -5.60609600 | -2.79298800 |
| C | 1.14978000  | -5.22801900 | -3.45725800 |



|   |             |             |             |
|---|-------------|-------------|-------------|
| C | -0.13083400 | -5.67130200 | -3.01437700 |
| C | -1.31895000 | -5.32708300 | -3.72415800 |
| C | -1.24323200 | -4.33008900 | -4.73209400 |
| C | -2.43848700 | -3.80022800 | -5.30139500 |
| C | -2.39104900 | -2.53692300 | -5.97178100 |
| C | -0.22986800 | -6.26347700 | -1.74627700 |
| C | 0.95788200  | -6.39755500 | -0.96848800 |
| C | 2.24764600  | -6.17825200 | -1.52074100 |
| C | 3.43472900  | -6.39809900 | -0.77270700 |
| C | 4.72583500  | -6.27050500 | -1.36513100 |
| C | 4.82547400  | -5.68483700 | -2.65007500 |
| C | 6.10409000  | -5.32463500 | -3.16511000 |
| C | 6.18117600  | -4.34235000 | -4.20024000 |
| C | 3.32436300  | -6.62137600 | 0.60649000  |
| C | 2.02926400  | -6.57455700 | 1.19274600  |
| C | 0.84613200  | -6.60075300 | 0.41048100  |
| C | -0.44669400 | -6.67576000 | 1.00151700  |
| C | -1.62341800 | -6.77393800 | 0.20225400  |
| C | -1.51184800 | -6.56807100 | -1.20100100 |
| C | -2.68918000 | -6.41577700 | -1.99241500 |
| C | -2.59109900 | -5.78492200 | -3.27190900 |
| C | -0.55986600 | -6.42132900 | 2.38031200  |
| C | 0.62742700  | -6.13441100 | 3.11645000  |
| C | 1.91880600  | -6.34764500 | 2.56891000  |
| C | 3.10409300  | -6.17250200 | 3.33973100  |
| C | 4.39241900  | -6.46858500 | 2.80316200  |
| C | 4.50477900  | -6.69266100 | 1.40694400  |
| C | 5.79324700  | -6.74232400 | 0.80014400  |
| C | 5.90438400  | -6.53017100 | -0.60871200 |
| C | 3.00054300  | -5.53504700 | 4.58821200  |
| C | 1.71749300  | -5.08035600 | 5.00558500  |
| C | 0.52592400  | -5.48538800 | 4.35052900  |
| C | -0.76422100 | -5.12875800 | 4.83862700  |
| C | -1.95382100 | -5.62583200 | 4.22712100  |
| C | -1.84982100 | -6.28822600 | 2.97382800  |
| C | -3.02650200 | -6.57340100 | 2.21839500  |

|   |             |             |            |
|---|-------------|-------------|------------|
| C | -2.91168500 | -6.82036600 | 0.81389800 |
| C | -0.84850700 | -4.13586400 | 5.82805200 |
| C | 0.36077800  | -3.54644800 | 6.29970700 |
| C | 1.63339500  | -4.09904100 | 6.00027100 |
| C | 2.83324000  | -3.57828000 | 6.56579600 |
| C | 4.09923300  | -4.18865800 | 6.31418300 |
| C | 4.18449600  | -5.18495900 | 5.30501000 |
| C | 5.46229400  | -5.63452200 | 4.85820100 |
| C | 5.56800800  | -6.28352800 | 3.58898400 |
| C | 2.77490300  | -2.33665300 | 7.22770000 |
| C | 1.52169900  | -1.66157100 | 7.28326900 |
| C | 0.30456600  | -2.30954100 | 6.94846200 |
| C | -0.96240000 | -1.67442300 | 7.10891600 |
| C | -2.18361000 | -2.37239600 | 6.86534800 |
| C | -2.12551800 | -3.63385000 | 6.21632200 |
| C | -3.32286200 | -4.24698100 | 5.73912100 |
| C | -3.23624500 | -5.25840600 | 4.73262400 |
| C | 1.49811400  | -0.27709900 | 7.51085100 |
| C | 0.26072500  | 0.40285900  | 7.35600500 |
| C | -0.98498200 | -0.28895600 | 7.30830500 |
| C | -2.22633400 | 0.40803100  | 7.26837800 |
| C | -3.46164500 | -0.30389200 | 7.23068800 |
| C | -3.44044700 | -1.71792900 | 7.02763300 |
| C | -4.65417100 | -2.41032700 | 6.71742400 |
| C | -4.59556900 | -3.68442000 | 6.07361300 |
| C | -4.31616500 | -6.36615400 | 2.80308700 |
| C | -4.42157900 | -5.70599200 | 4.06644000 |
| C | -5.70674600 | -5.28821000 | 4.54430100 |
| C | -5.79391400 | -4.27190700 | 5.55014300 |
| C | 5.29300700  | -3.63788300 | 6.86764800 |
| C | 5.23620500  | -2.36776300 | 7.52356700 |
| C | 3.98632300  | -1.68517600 | 7.61608600 |
| C | 3.96468100  | -0.27930300 | 7.83302800 |
| C | 2.73064500  | 0.42067800  | 7.65640100 |
| C | 2.75010600  | 1.80366100  | 7.37490200 |
| C | 1.53595000  | 2.42229100  | 6.96252800 |

|   |             |             |             |
|---|-------------|-------------|-------------|
| C | 0.28062600  | 1.76969300  | 7.07845600  |
| C | -4.69726000 | 0.41082800  | 7.12803700  |
| C | -5.93173600 | -0.31113300 | 7.03272500  |
| C | -5.91010700 | -1.72852800 | 6.82669400  |
| C | -7.12047900 | -2.41080800 | 6.49742000  |
| C | -7.06233300 | -3.69218300 | 5.85734900  |
| C | 6.64687300  | -5.22316900 | 5.54483600  |
| C | 6.56153700  | -4.21964800 | 6.55393800  |
| C | 7.76595000  | -3.65191000 | 7.09519700  |
| C | 7.70985100  | -2.37015100 | 7.74568600  |
| C | 6.45028400  | -1.68447000 | 7.84631600  |
| C | 6.42926300  | -0.27428000 | 8.05374300  |
| C | 5.19403400  | 0.43744700  | 7.94065800  |
| C | 5.21075700  | 1.84389900  | 7.67562000  |
| C | 3.99829600  | 2.49500400  | 7.30014400  |
| C | 1.58823700  | 3.64550900  | 6.27934400  |
| C | 2.85449600  | 4.23929800  | 6.01444600  |
| C | 4.05096300  | 3.73589500  | 6.60842100  |
| C | 7.66821800  | 0.44765100  | 8.15660200  |
| C | 7.68405800  | 1.86252900  | 7.89800100  |
| C | 6.46068300  | 2.52571200  | 7.53785300  |
| C | 6.51200900  | 3.77526200  | 6.85265600  |
| C | 5.31294000  | 4.32910100  | 6.30625100  |
| C | 5.39354300  | 5.31807200  | 5.27581100  |
| C | 4.21004700  | 5.68982400  | 4.57308700  |
| C | 2.93400900  | 5.21204700  | 4.99891200  |
| C | -7.16328200 | 0.40034800  | 6.90638400  |
| C | 7.93511700  | -5.66088900 | 5.07965900  |
| C | 8.04087000  | -6.31389300 | 3.80168400  |
| C | 6.85593000  | -6.51842000 | 3.01491300  |
| C | 6.96902200  | -6.74901100 | 1.61240900  |
| C | -6.88979100 | -5.71213600 | 3.86585800  |
| C | -6.78382000 | -6.37343200 | 2.59822000  |
| C | -5.49631700 | -6.60234700 | 2.02447600  |
| C | -5.38174500 | -6.84481900 | 0.61700700  |
| C | -4.08827300 | -6.85113500 | -0.00086800 |

|   |             |             |             |
|---|-------------|-------------|-------------|
| C | -3.97621600 | -6.65008200 | -1.41172700 |
| C | 8.26704400  | -6.78012100 | 0.99546600  |
| C | 8.37908500  | -6.58003900 | -0.42554000 |
| C | 7.19133300  | -6.34797100 | -1.20154400 |
| C | 7.29165600  | -5.73747600 | -2.48599200 |
| C | -6.55703000 | -6.85231300 | -0.19416300 |
| C | -6.44488400 | -6.64785400 | -1.60878800 |
| C | -5.15894400 | -6.44105800 | -2.19449500 |
| C | -5.06022700 | -5.80704200 | -3.47557000 |
| C | -3.77950000 | -5.38851200 | -3.96376000 |
| C | -3.70278200 | -4.39018000 | -4.98370000 |
| C | 8.57982400  | -5.34929900 | -2.99130300 |
| C | 8.65851800  | -4.35683100 | -4.03020600 |
| C | 7.44797300  | -3.77614800 | -4.54434500 |
| C | 7.49554400  | -2.51441500 | -5.20573100 |
| C | -6.24844000 | -5.39060700 | -4.14951100 |
| C | -6.17160200 | -4.38829600 | -5.17202900 |
| C | -4.90729700 | -3.81666000 | -5.50873500 |
| C | -4.85977800 | -2.54745000 | -6.17209900 |
| C | -3.60762700 | -1.86304300 | -6.30824500 |
| C | -3.59218000 | -0.45406500 | -6.55054600 |
| C | 8.75402100  | -1.83638100 | -5.35741900 |
| C | 8.76748100  | -0.41691300 | -5.59422500 |
| C | 7.52166800  | 0.29623300  | -5.66984900 |
| C | 7.50130900  | 1.70536500  | -5.45684300 |
| C | -6.07672800 | -1.87109300 | -6.48890600 |
| C | -6.06184100 | -0.45821600 | -6.73331600 |
| C | -4.83015600 | 0.26093100  | -6.65687400 |
| C | -4.85049900 | 1.67962400  | -6.45671000 |
| C | -3.63289800 | 2.37283700  | -6.15251000 |
| C | -3.68593400 | 3.65781400  | -5.52805600 |
| C | 8.72490300  | 2.40255600  | -5.16776300 |
| C | 8.66991100  | 3.69064000  | -4.52773100 |
| C | 7.39267200  | 4.25481700  | -4.18711400 |
| C | 7.31042400  | 5.27526200  | -3.19553100 |
| C | -6.10265300 | 2.35527200  | -6.33428000 |

|   |             |             |             |
|---|-------------|-------------|-------------|
| C | -6.15633200 | 3.64219500  | -5.70432300 |
| C | -4.95736800 | 4.23682300  | -5.20576300 |
| C | -5.03932500 | 5.25776300  | -4.20430900 |
| C | -3.84912300 | 5.68718000  | -3.53031300 |
| C | -3.95128200 | 6.33583800  | -2.26043000 |
| C | 8.50608600  | 5.73045000  | -2.54116900 |
| C | 8.40339100  | 6.39686400  | -1.26979300 |
| C | 7.10718200  | 6.60097000  | -0.68275600 |
| C | 6.99577400  | 6.82894400  | 0.72024100  |
| C | 5.70529900  | 6.81531800  | 1.33574600  |
| C | 5.59388700  | 6.58975000  | 2.74390600  |
| C | 4.31009500  | 6.32836900  | 3.30768000  |
| C | -6.31828400 | 5.67035600  | -3.72120900 |
| C | -6.42038500 | 6.32906600  | -2.45147200 |
| C | -5.24208600 | 6.56258500  | -1.67933500 |
| C | 8.17967400  | 6.85302400  | 1.53535300  |
| C | 8.06707500  | 6.63046300  | 2.95280700  |
| C | 6.77241300  | 6.38479000  | 3.52730600  |
| C | 6.67166900  | 5.74752100  | 4.79920000  |
| C | 7.86530700  | 5.36032800  | 5.49983500  |
| C | 7.78463800  | 4.36518900  | 6.53628300  |
| C | 8.89532600  | -0.26425900 | 8.33383900  |
| C | 8.91641500  | -1.70354900 | 8.12520600  |
| C | 8.92657700  | 2.56590900  | 7.82042700  |
| C | 8.97768000  | 3.84404800  | 7.12740400  |
| C | 9.32545600  | -6.59949300 | 3.24166100  |
| C | 9.44082200  | -6.83814800 | 1.81041100  |
| C | 9.11487200  | -5.29376100 | 5.79936500  |
| C | 9.02825900  | -4.26852500 | 6.82794700  |
| C | 9.92615100  | -3.81952400 | -4.41627100 |
| C | 9.97474900  | -2.53331700 | -5.09523200 |
| C | 9.76813900  | -5.80841800 | -2.34182300 |
| C | 9.66564700  | -6.43801300 | -1.03327100 |
| C | 9.24184700  | 6.48106000  | 3.75435100  |
| C | 9.13861800  | 5.83540000  | 5.05427200  |
| C | 9.46766600  | 6.92108100  | 0.91779700  |

|   |             |             |             |
|---|-------------|-------------|-------------|
| C | 9.58166200  | 6.68909100  | -0.51406300 |
| C | 9.87058700  | 4.32095900  | -4.07368100 |
| C | 9.78682100  | 5.36100700  | -3.05943600 |
| C | 9.98019200  | 1.74379800  | -5.35381800 |
| C | 10.00186800 | 0.30513900  | -5.57131600 |
| C | -8.39536800 | -0.31903300 | 6.80239100  |
| C | -8.37389600 | -1.72868000 | 6.59745600  |
| C | -7.70946300 | 6.54357300  | -1.86939500 |
| C | -7.31921000 | 1.66383100  | -6.63161200 |
| C | -7.29882000 | 0.25328400  | -6.83204300 |
| C | -7.42575500 | 4.21590500  | -5.38000800 |
| C | -7.50691300 | 5.23387600  | -4.38640600 |
| C | -8.17285000 | -5.28753900 | 4.33519500  |
| C | -8.25928700 | -4.27362200 | 5.33226200  |
| C | -7.96259300 | -6.60186200 | 1.82048600  |
| C | -7.84880900 | -6.84097000 | 0.42055000  |
| C | -7.52805800 | -5.80101900 | -3.65942100 |
| C | -7.62649800 | -6.43246900 | -2.38601500 |
| C | -7.37519800 | -3.81234500 | -5.68809000 |
| C | -7.32773500 | -2.55045700 | -6.34812100 |
| C | 10.20015300 | 4.51282300  | 6.82658500  |
| C | 10.27751300 | 5.47008000  | 5.82977300  |
| C | 10.09551100 | 1.87252000  | 8.25089600  |
| C | 10.08062800 | 0.51070300  | 8.49756800  |
| C | 10.49094900 | 6.79710800  | 3.14403900  |
| C | 10.59952600 | 7.00808300  | 1.78029100  |
| C | 10.17749900 | -3.69368000 | 7.44538800  |
| C | 10.12389200 | -2.45926300 | 8.06906200  |
| C | 10.35567400 | -5.80937500 | 5.32314000  |
| C | 10.45688300 | -6.43680500 | 4.09323800  |
| C | 10.80265700 | -6.73880300 | -0.22776600 |
| C | 10.69485800 | -6.93095000 | 1.13916100  |
| C | 11.01412500 | -5.43514000 | -2.92519200 |
| C | 11.09019600 | -4.47807200 | -3.92267500 |
| C | 10.83515900 | 6.52945400  | -1.17454200 |
| C | 10.93373200 | 5.89156400  | -2.39904100 |

|   |              |             |             |
|---|--------------|-------------|-------------|
| C | 11.10615100  | 3.74708200  | -4.49453600 |
| C | 11.15887800  | 2.50822400  | -5.10990500 |
| C | 11.20410500  | -0.46123500 | -5.55626300 |
| C | 11.19095500  | -1.82625000 | -5.32693400 |
| C | -8.55247800  | -1.88348000 | -6.69561900 |
| C | -8.53785300  | -0.46721100 | -6.93966700 |
| C | -8.64753500  | -4.40358700 | -5.37666000 |
| C | -8.72466100  | -5.40866100 | -4.35227700 |
| C | -8.57878100  | 2.34965300  | -6.53820200 |
| C | -8.63256500  | 3.63901200  | -5.90585100 |
| C | -9.03356500  | -6.87871600 | -0.39220600 |
| C | -8.92128400  | -6.67092800 | -1.80975700 |
| C | -9.26068200  | -6.40190400 | 2.40406100  |
| C | -9.36696300  | -5.73725200 | 3.67379000  |
| C | -9.59688100  | -2.42171400 | 6.29889000  |
| C | -9.53905300  | -3.70833700 | 5.66139900  |
| C | -9.63964100  | 0.39361100  | 6.70752100  |
| C | -8.79463900  | 5.67275400  | -3.92296400 |
| C | -8.89691500  | 6.33569100  | -2.65203900 |
| C | -10.87505900 | -0.32528300 | 6.68624800  |
| C | -10.85321400 | -1.76352900 | 6.47765500  |
| C | -10.18061100 | 6.62953100  | -2.09577100 |
| C | -9.78584500  | 1.68261600  | -6.91463600 |
| C | -9.76486900  | 0.24378000  | -7.11994800 |
| C | -9.89342000  | 4.26191200  | -5.64954000 |
| C | -9.97603700  | 5.30171600  | -4.63717200 |
| C | -10.64989600 | -5.37686800 | 4.19145200  |
| C | -10.73793800 | -4.33880100 | 5.20485500  |
| C | -10.43733700 | -6.70816600 | 1.65225200  |
| C | -10.32139800 | -6.95125200 | 0.22405200  |
| C | -9.99664200  | -5.88784600 | -3.90967800 |
| C | -10.09691700 | -6.53372900 | -2.61146000 |
| C | -9.84226200  | -3.87695500 | -5.95886700 |
| C | -9.79380200  | -2.58972700 | -6.63234700 |
| C | -10.96306700 | -1.89438600 | -7.05830900 |
| C | -10.94909700 | -0.53066800 | -7.29280400 |

|   |              |             |             |
|---|--------------|-------------|-------------|
| C | -11.06315600 | -4.55290300 | -5.66785900 |
| C | -11.13745800 | -5.52081600 | -4.68172200 |
| C | -10.99237300 | 2.44029400  | -6.86788800 |
| C | -11.04414900 | 3.68188300  | -6.25896100 |
| C | -11.45244500 | -7.05796900 | -0.63708700 |
| C | -11.34439000 | -6.85657900 | -2.00181700 |
| C | -11.69185700 | -6.55692700 | 2.31219300  |
| C | -11.79424300 | -5.91595900 | 3.53417000  |
| C | -12.03137200 | -2.52862800 | 6.23513500  |
| C | -11.97579200 | -3.76832900 | 5.62290400  |
| C | -12.07643200 | 0.44192500  | 6.66559900  |
| C | -12.06028000 | 1.80548400  | 6.43068300  |
| C | -11.21464200 | 5.83035500  | -4.16988400 |
| C | -11.31309000 | 6.46991600  | -2.94668000 |
| H | 12.07556200  | -4.16948200 | -4.26784200 |
| H | 11.94286500  | -5.84088600 | -2.52757500 |
| H | 12.14449100  | -2.34444800 | -5.24008200 |
| H | 11.79679700  | -6.73918600 | -0.67155400 |
| H | 12.04442200  | 4.24594600  | -4.25774300 |
| H | 12.13636300  | 2.08342200  | -5.33193900 |
| H | 11.92575800  | 5.72232400  | -2.81439500 |
| H | 12.16747100  | 0.03881500  | -5.64055800 |
| H | 11.40223900  | 6.79345900  | 3.73956000  |
| H | 11.59185200  | 7.16051700  | 1.35922900  |
| H | 11.25402700  | 5.88691700  | 5.58934000  |
| H | 11.75360200  | 6.83575100  | -0.67661400 |
| H | 11.44474500  | -6.73432000 | 3.74567300  |
| H | 11.26808000  | -5.63901400 | 5.89200300  |
| H | 11.60841300  | -7.07496600 | 1.71351800  |
| H | 11.14438100  | -4.18610700 | 7.35719500  |
| H | 11.02160300  | 0.01863800  | 8.73761100  |
| H | 11.04765900  | 2.39718800  | 8.30789700  |
| H | 11.05068200  | -2.02981600 | 8.44566500  |
| H | 11.11903400  | 4.21547300  | 7.32892000  |
| H | -13.01219100 | 2.32600300  | 6.34125300  |
| H | -13.04034700 | -0.05663300 | 6.75173800  |



|   |              |             |             |
|---|--------------|-------------|-------------|
| H | -12.93655400 | 4.15702500  | 5.38547200  |
| H | -13.00921200 | -2.10369700 | 6.45509600  |
| H | -12.46093200 | 7.12007600  | -0.57000200 |
| H | -12.65175300 | 6.76315200  | 1.81364000  |
| H | -12.29876100 | 6.77778800  | -2.60203800 |
| H | -12.79915100 | 5.84319400  | 3.65807500  |
| H | -11.91938600 | 2.00819100  | -7.24083000 |
| H | -12.00992400 | 4.17752100  | -6.17668300 |
| H | -11.88943700 | -0.03763200 | -7.53327700 |
| H | -12.12674800 | 5.66024800  | -4.73934000 |
| H | -12.78648100 | -5.75405700 | 3.95171600  |
| H | -12.60763000 | -6.87407600 | 1.81633800  |
| H | -12.91222000 | -4.27005600 | 5.38528000  |
| H | -12.44302300 | -7.21784900 | -0.21485200 |
| H | -12.11237600 | -5.94281600 | -4.44383000 |
| H | -11.98253700 | -4.25186100 | -6.16708600 |
| H | -12.25425000 | -6.86590400 | -2.59947600 |
| H | -11.91386500 | -2.42054500 | -7.12367900 |
